# Supplementary material for: Prolonged partner separation erodes nucleus accumbens transcriptional signatures of pair bonding in male prairie voles
Source: eLife journal article supplement (doi:10.7554/elife.80517), 2023-02-28

## Opposite-sex Baseline

## Same-sex Baseline

48 hours

|                      | Raw partner huddle | Raw novel huddle | Raw total huddle | Partner preference | Partner chamber time | Novel chamber time | Empty chamber time |
|----------------------|--------------------|------------------|------------------|--------------------|----------------------|--------------------|--------------------|
| Raw partner huddle   | 0.16               | **<br>-0.52      | -0.27            | ***<br>0.59        | *<br>0.28            | *<br>-0.26         | 0.16               |
| Raw novel huddle     | -0.14              | ***<br>0.46      | *<br>0.24        | ***<br>-0.56       | ***<br>-0.32         | ***<br>0.41        | **<br>-0.44        |
| Raw total huddle     | 0.15               | *<br>-0.5        | -0.26            | **<br>0.53         | *<br>0.25            | -0.2               | 0.06               |
| Partner Preference   | 0.13               | ***<br>-0.4      | -0.21            | ***<br>0.56        | **<br>0.26           | **<br>-0.33        | **<br>0.36         |
| Partner chamber time | **<br>0.38         | *<br>-0.22       | 0.09             | **<br>0.37         | *<br>0.42            | *<br>-0.38         | 0.22               |
| Novel chamber time   | **<br>-0.41        | 0.14             | -0.16            | *<br>-0.3          | *<br>-0.34           | 0.32               | -0.19              |
| Empty chamber time   | 0.03               | ***<br>0.56      | **<br>0.42       | ***<br>-0.6        | ***<br>-0.63         | ***<br>0.54        | **<br>-0.25        |

|                      | Raw partner huddle | Raw novel huddle | Raw total huddle | Partner preference | Partner chamber time | Novel chamber time | Empty chamber time |
|----------------------|--------------------|------------------|------------------|--------------------|----------------------|--------------------|--------------------|
| Raw partner huddle   | ***<br>0.43        | ***<br>-0.83     | 0.04             | ***<br>0.8         | ***<br>0.8           | ***<br>-0.57       | -0.43              |
| Raw novel huddle     | **<br>-0.35        | ***<br>0.82      | 0.03             | ***<br>-0.85       | ***<br>-0.79         | ***<br>0.7         | 0.18               |
| Raw total huddle     | ***<br>0.34        | ***<br>-0.51     | 0.1              | ***<br>0.44        | ***<br>0.5           | ***<br>-0.22       | **<br>-0.5         |
| Partner Preference   | **<br>0.35         | ***<br>-0.87     | -0.06            | ***<br>0.88        | ***<br>0.81          | ***<br>-0.73       | -0.17              |
| Partner chamber time | **<br>0.41         | ***<br>-0.91     | -0.02            | ***<br>0.91        | ***<br>0.83          | ***<br>-0.68       | -0.29              |
| Novel chamber time   | *<br>-0.33         | ***<br>0.88      | 0.07             | ***<br>-0.93       | ***<br>-0.77         | ***<br>0.7         | 0.17               |
| Empty chamber time   | ***<br>-0.4        | *<br>0.37        | **<br>-0.22      | *<br>-0.21         | ***<br>-0.46         | *<br>0.14          | ***<br>0.55        |

4 weeks

|                      | Raw partner huddle | Raw novel huddle | Raw total huddle | Partner preference | Partner chamber time | Novel chamber time | Empty chamber time |
|----------------------|--------------------|------------------|------------------|--------------------|----------------------|--------------------|--------------------|
| Raw partner huddle   | *<br>0.31          | -0.04            | 0.17             | 0.11               | -0.42                | 0.41               | -0.27              |
| Raw novel huddle     | 0.2                | ***<br>0.58      | ***<br>0.55      | ***<br>-0.67       | **<br>-0.29          | ***<br>0.4         | ***<br>-0.47       |
| Raw total huddle     | *<br>0.34          | 0.12             | 0.31             | -0.08              | -0.47                | 0.48               | *<br>-0.38         |
| Partner Preference   | -0.09              | ***<br>-0.56     | ***<br>-0.46     | ***<br>0.68        | **<br>0.12           | ***<br>-0.27       | ***<br>0.44        |
| Partner chamber time | ***<br>0.51        | 0.25             | 0.51             | -0.15              | -0.02                | 0.14               | -0.3               |
| Novel chamber time   | ***<br>-0.53       | -0.12            | -0.43            | -0.01              | -0.05                | -0.01              | 0.12               |
| Empty chamber time   | **<br>-0.35        | *<br>-0.47       | ***<br>-0.56     | 0.43               | 0.18                 | *<br>-0.37         | **<br>0.58         |

|                      | Raw partner huddle | Raw novel huddle | Raw total huddle | Partner preference | Partner chamber time | Novel chamber time | Empty chamber time |
|----------------------|--------------------|------------------|------------------|--------------------|----------------------|--------------------|--------------------|
| Raw partner huddle   | ***<br>0.7         | -0.02            | 0.67             | 0.06               | 0.49                 | -0.09              | ***<br>-0.69       |
| Raw novel huddle     | *<br>-0.17         | ***<br>0.81      | 0.2              | ***<br>-0.71       | ***<br>-0.7          | ***<br>0.77        | -0.08              |
| Raw total huddle     | ***<br>0.7         | 0.09             | 0.72             | -0.03              | 0.4                  | 0.02               | ***<br>-0.72       |
| Partner Preference   | *<br>0.17          | ***<br>-0.82     | -0.2             | ***<br>0.69        | ***<br>0.68          | ***<br>-0.73       | 0.04               |
| Partner chamber time | **<br>0.47         | 0.11             | 0.51             | -0.07              | 0.25                 | 0.01               | ***<br>-0.45       |
| Novel chamber time   | -0.19              | 0.49             | 0.04             | -0.59              | -0.36                | 0.61               | ***<br>-0.39       |
| Empty chamber time   | -0.32              | *<br>-0.43       | ***<br>-0.5      | *<br>0.46          | 0.01                 | *<br>-0.42         | ***<br>0.68        |

48 hours sep

|                      | Raw partner huddle | Raw novel huddle | Raw total huddle | Partner preference | Partner chamber time | Novel chamber time | Empty chamber time |
|----------------------|--------------------|------------------|------------------|--------------------|----------------------|--------------------|--------------------|
| Raw partner huddle   | ***<br>0.86        | 0.22             | ***<br>0.85      | -0.03              | ***<br>0.89          | ***<br>-0.86       | **<br>-0.43        |
| Raw novel huddle     | 0.25               | 0.12             | 0.25             | -0.01              | -0.06                | 0.18               | -0.19              |
| Raw total huddle     | ***<br>0.89        | 0.24             | ***<br>0.88      | -0.03              | ***<br>0.87          | ***<br>-0.82       | **<br>-0.45        |
| Partner Preference   | -0.05              | 0                | -0.05            | -0.08              | 0.28                 | -0.42              | 0.13               |
| Partner chamber time | -0.23              | **<br>-0.61      | -0.25            | **<br>0.55         | 0                    | -0.16              | *<br>0.3           |
| Novel chamber time   | 0.12               | *<br>0.47        | 0.14             | -0.44              | -0.06                | 0.23               | -0.27              |
| Empty chamber time   | *<br>0.38          | *<br>0.45        | *<br>0.39        | -0.32              | 0.27                 | -0.29              | -0.07              |

|                      | Raw partner huddle | Raw novel huddle | Raw total huddle | Partner preference | Partner chamber time | Novel chamber time | Empty chamber time |
|----------------------|--------------------|------------------|------------------|--------------------|----------------------|--------------------|--------------------|
| Raw partner huddle   | ***<br>0.76        | -0.2             | ***<br>0.75      | ***<br>0.76        | ***<br>0.64          | ***<br>-0.49       | ***<br>-0.68       |
| Raw novel huddle     | -0.36              | -0.35            | *<br>-0.4        | 0.25               | -0.27                | 0.25               | 0.25               |
| Raw total huddle     | ***<br>0.74        | -0.24            | ***<br>0.72      | ***<br>0.79        | ***<br>0.63          | ***<br>-0.47       | ***<br>-0.67       |
| Partner Preference   | *<br>0.42          | 0.32             | *<br>0.45        | -0.22              | 0.31                 | -0.3               | -0.29              |
| Partner chamber time | ***<br>0.66        | 0.39             | ***<br>0.71      | 0.05               | ***<br>0.46          | *<br>-0.26         | **<br>-0.55        |
| Novel chamber time   | -0.37              | -0.47            | *<br>-0.43       | 0.27               | -0.2                 | 0.14               | 0.22               |
| Empty chamber time   | -0.37              | 0.24             | -0.35            | ***<br>-0.59       | *<br>-0.37           | *<br>0.16          | *<br>0.48          |

4 weeks sep

|                      | Raw partner huddle | Raw novel huddle | Raw total huddle | Partner preference | Partner chamber time | Novel chamber time | Empty chamber time |
|----------------------|--------------------|------------------|------------------|--------------------|----------------------|--------------------|--------------------|
| Raw partner huddle   | 0.28               | **<br>0.55       | 0.48             | -0.21              | 0.15                 | *<br>0.49          | ***<br>-0.86       |
| Raw novel huddle     | -0.21              | 0.08             | -0.2             | -0.16              | -0.02                | 0.04               | -0.02              |
| Raw total huddle     | 0.2                | **<br>0.57       | 0.39             | -0.26              | 0.14                 | ***<br>0.49        | ***<br>-0.84       |
| Partner Preference   | 0.53               | 0.22             | 0.65             | 0.16               | 0.41                 | 0.14               | -0.76              |
| Partner chamber time | *<br>-0.37         | ***<br>0.68      | -0.19            | ***<br>-0.6        | **<br>-0.51          | ***<br>0.73        | -0.25              |
| Novel chamber time   | 0.24               | ***<br>-0.55     | 0.1              | 0.43               | 0.36                 | -0.6               | 0.29               |
| Empty chamber time   | ***<br>0.58        | ***<br>-0.7      | **<br>0.42       | ***<br>0.83        | ***<br>0.72          | ***<br>-0.71       | -0.07              |

|                      | Raw partner huddle | Raw novel huddle | Raw total huddle | Partner preference | Partner chamber time | Novel chamber time | Empty chamber time |
|----------------------|--------------------|------------------|------------------|--------------------|----------------------|--------------------|--------------------|
| Raw partner huddle   | ***<br>0.86        | **<br>0.48       | ***<br>0.88      | 0.49               | **<br>0.61           | -0.41              | **<br>-0.35        |
| Raw novel huddle     | ***<br>-0.56       | **<br>-0.35      | ***<br>-0.57     | -0.12              | 0.02                 | -0.17              | 0.3                |
| Raw total huddle     | ***<br>0.86        | **<br>0.48       | ***<br>0.87      | 0.5                | **<br>0.63           | -0.43              | **<br>-0.34        |
| Partner Preference   | ***<br>0.82        | *<br>0.24        | ***<br>0.81      | 0.56               | **<br>0.38           | -0.27              | *<br>-0.18         |
| Partner chamber time | ***<br>0.54        | ***<br>0.82      | ***<br>0.6       | -0.14              | 0.17                 | 0.13               | ***<br>-0.59       |
| Novel chamber time   | *<br>-0.24         | **<br>-0.4       | *<br>-0.27       | 0.3                | 0.19                 | -0.35              | **<br>0.33         |
| Empty chamber time   | ***<br>-0.54       | ***<br>-0.77     | ***<br>-0.59     | -0.13              | **<br>-0.47          | 0.2                | ***<br>0.5         |

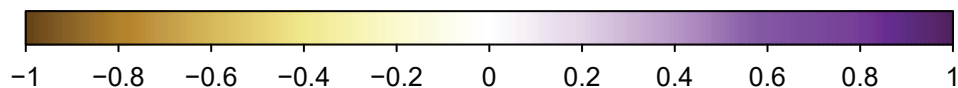

Supplement: supp [file elife-80517-supp-v1.zip]
