# Supplementary material for: Prolonged partner separation erodes nucleus accumbens transcriptional signatures of pair bonding in male prairie voles
Source: eLife journal article supplement (doi:10.7554/elife.80517), 2023-02-28

## Observed correlated gene expression

A

*All genes*

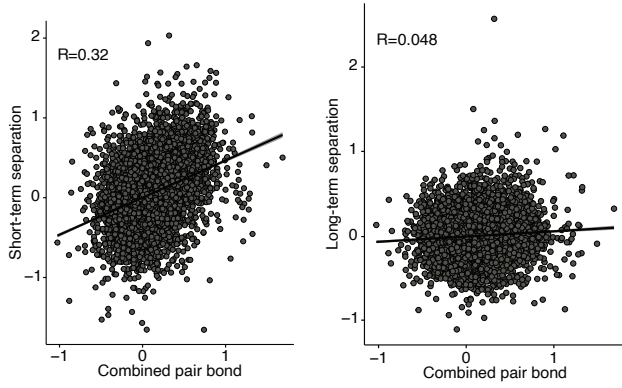

B

*Quartile 1 and 4 genes*

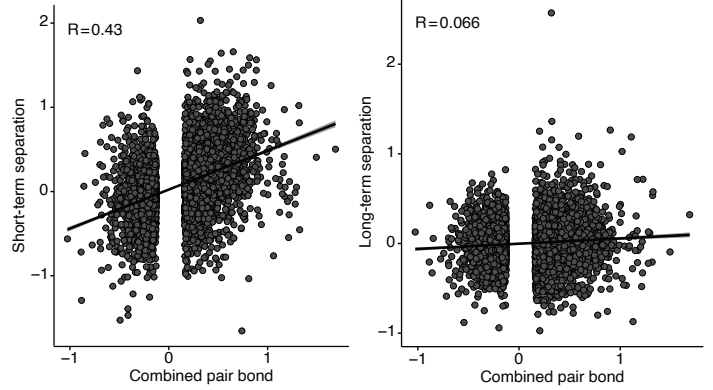

C

*Observed expression data*

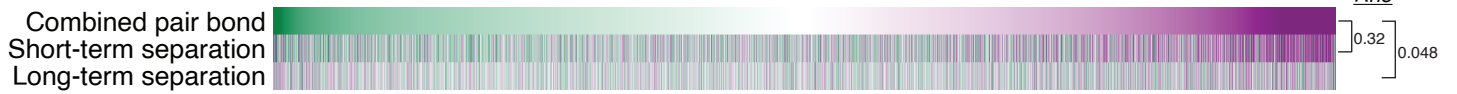

*Representative heatmap of observed combined pair bond and cohort shuffled ST and LT separation*

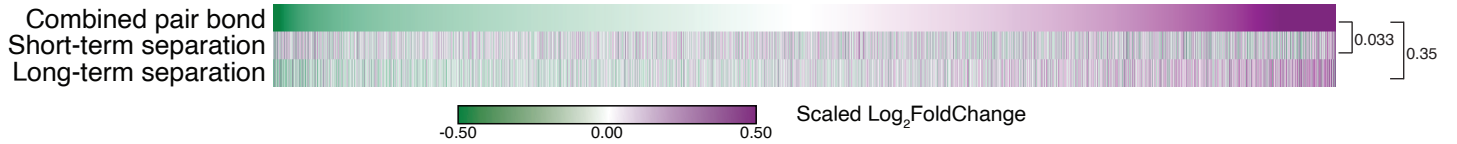

D

**Distributions of the correlation between observed combined pair bond and shuffled partner separation**

*Short-term separation*

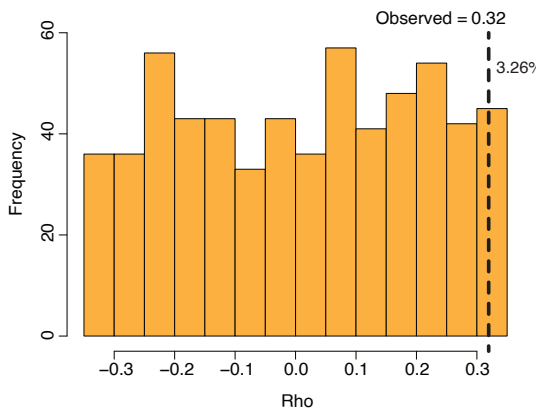

*Long-term separation*

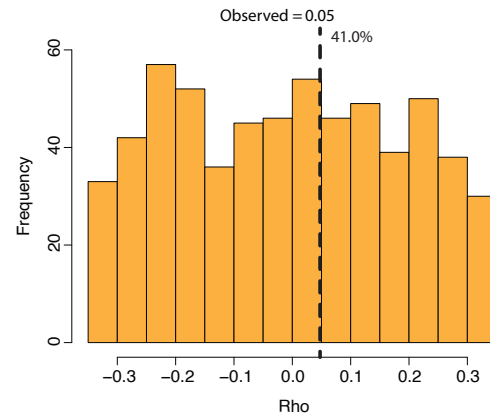

E

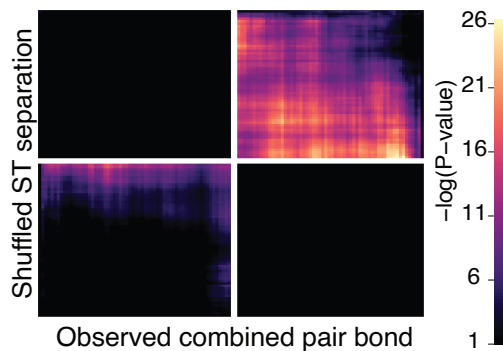

F

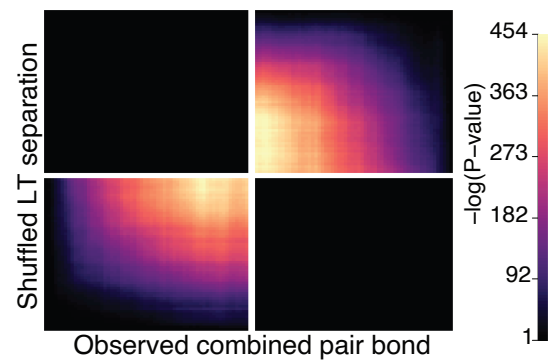

Supplement: supp [file elife-80517-supp-v1.zip]
