# Supplementary material for: Prolonged partner separation erodes nucleus accumbens transcriptional signatures of pair bonding in male prairie voles
Source: eLife journal article supplement (doi:10.7554/elife.80517), 2023-02-28

A

Representative Morpheus plots

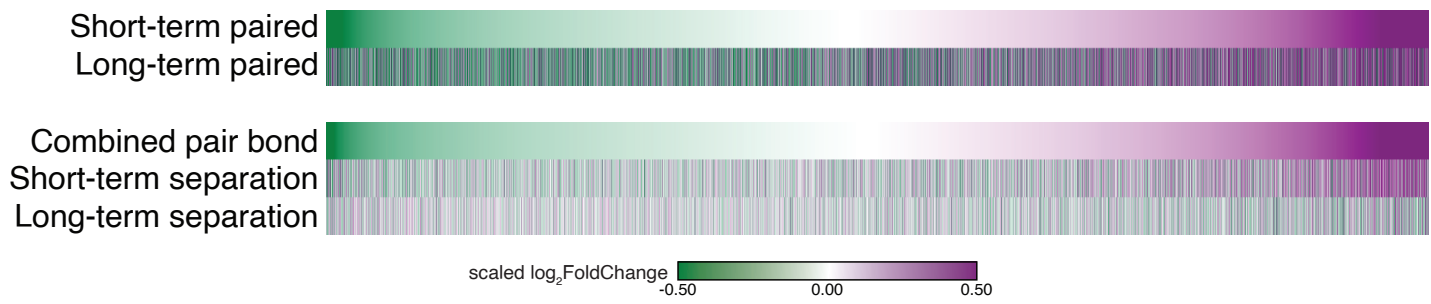

B

Representative RRHOs with differential expression used above

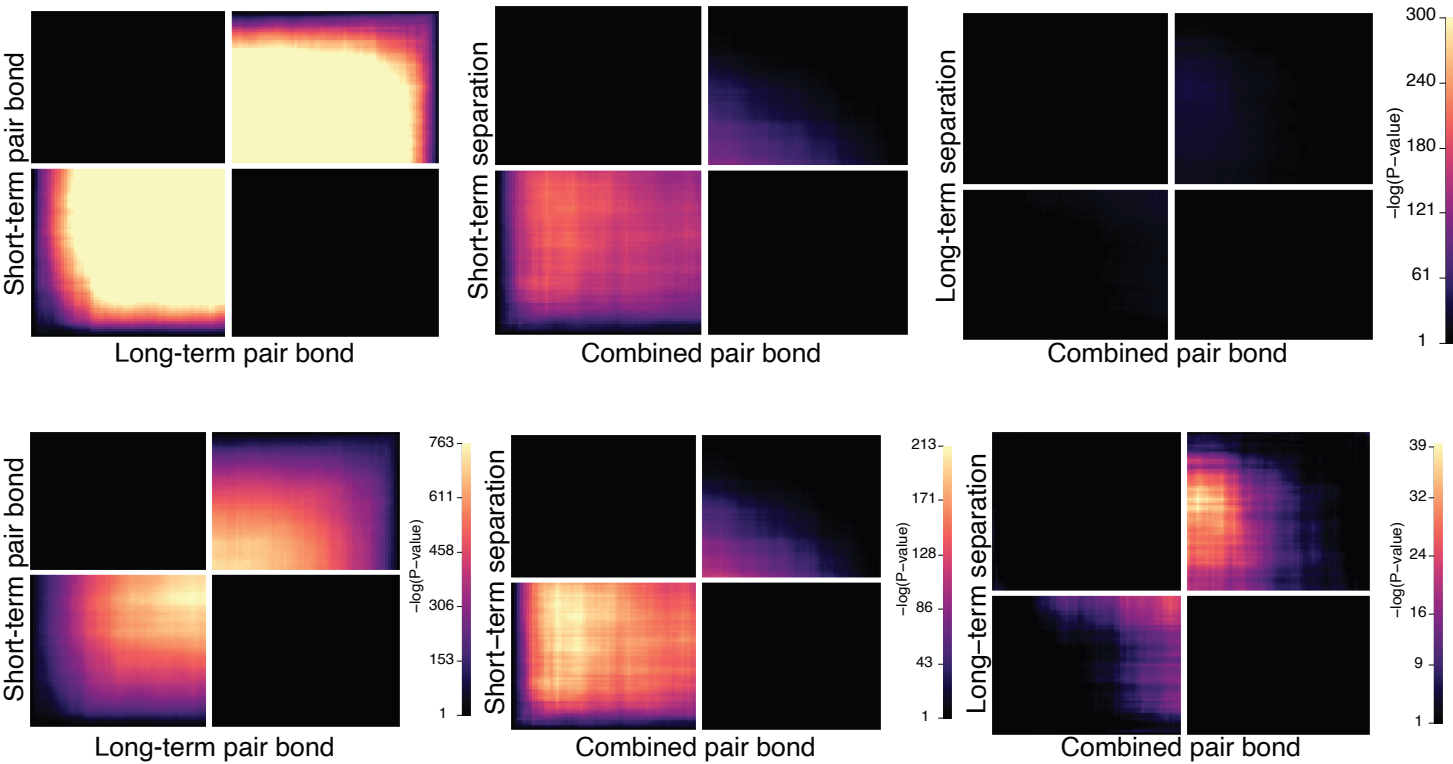

Supplement: supp [file elife-80517-supp-v1.zip]
