# Supplementary material for: Prolonged partner separation erodes nucleus accumbens transcriptional signatures of pair bonding in male prairie voles
Source: eLife journal article supplement (doi:10.7554/elife.80517), 2023-02-28

# Observed correlated gene expression

A

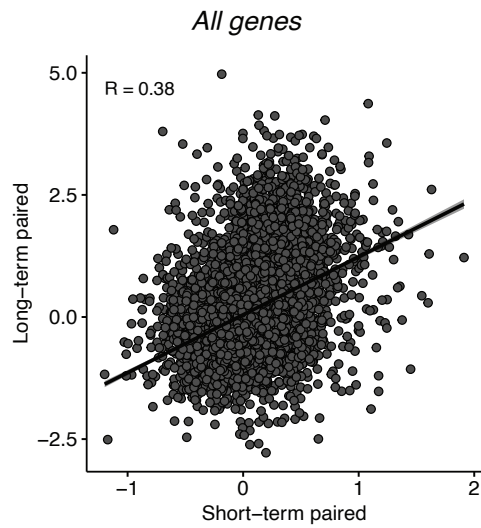

B

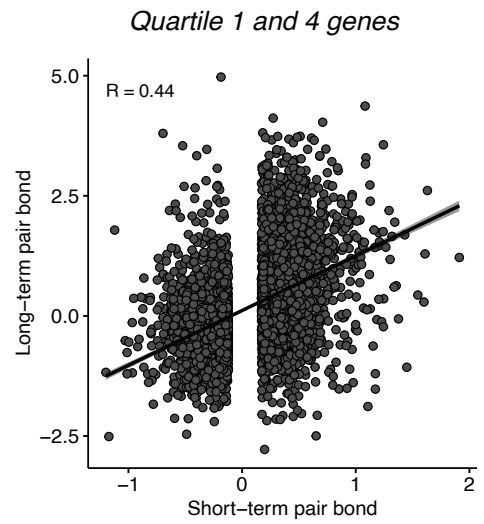

C

## Observed expression data

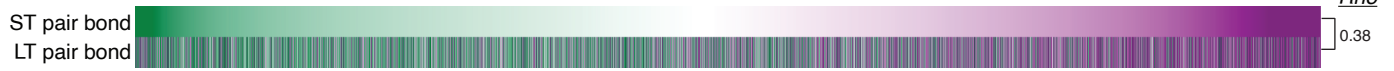

## Representative heatmap of observed ST pair bond and cohort shuffled LT pair bond

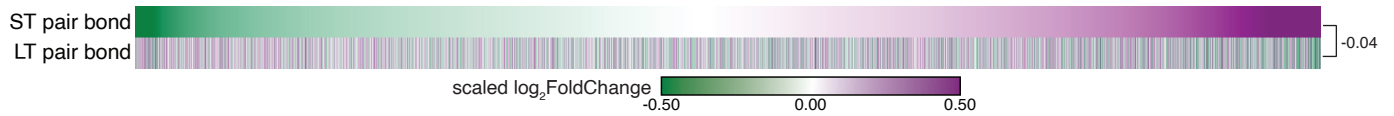

D

## Remain paired

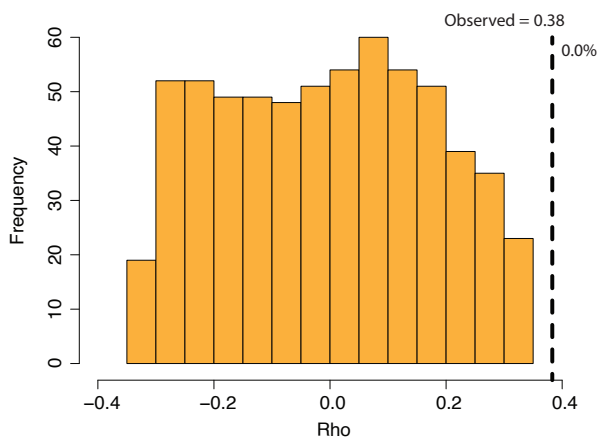

E

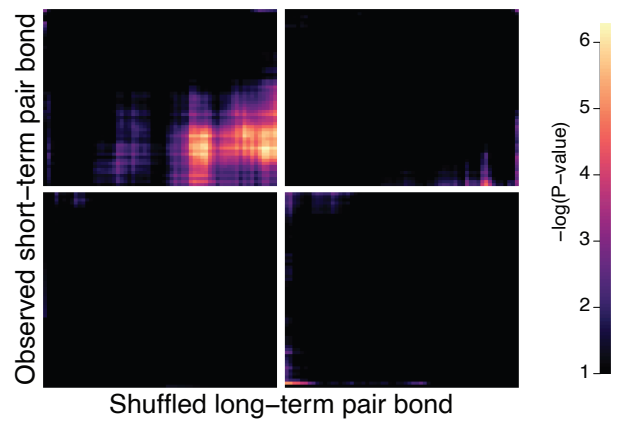

Supplement: supp [file elife-80517-supp-v1.zip]
