# Supplementary material for: Prolonged partner separation erodes nucleus accumbens transcriptional signatures of pair bonding in male prairie voles
Source: eLife journal article supplement (doi:10.7554/elife.80517), 2023-02-28
Supplement: supp [file elife-80517-supp-v1.zip]

A

|           |     |                                                               |
|-----------|-----|---------------------------------------------------------------|
| Mouse     | 5   | CAGCCATGAGCAGCAAAGTCTCACGCGACACCCTGTACGAGGCGGTGCGGGAAGTCCTGC  |
| Vole      | 53  | CAGCCATGAGCAGCAAAGTCTCTCGCGACACCCTGTACGAGGCGGTGCGGGAGGTCCTGC  |
| consensus |     | *****                                                         |
| Mouse     | 113 | ACGGGAACCAGCGCAAGCGCCGCAAGTTTCTGGAGACGGTGGAGCTGCAGATCAGCCTGA  |
| Vole      | 65  | ACGGGAACCAGCGCAAGCGCCGCAAGTTTCTGGAAACGGTGGAGCTGCAGATCAGCCTGA  |
| consensus |     | *****                                                         |
| Mouse     | 125 | AGAACTACGACCCTCAGAAGGACAAACGTTTCTCGGGCACCGTCAGGCTCAAGTCCACCC  |
| Vole      | 173 | AGAACTACGACCCCCAGAAGGACAAGCGTTTCTCGGGCACCGTCAGGCTCAAGTCCACCC  |
| consensus |     | *****                                                         |
| Mouse     | 185 | CACGCCCCAAGTTCTCGGTGTGCGTTCTGGGGGACCAGCAGCACTGTGATGAAGCCAAGG  |
| Vole      | 233 | CTCGCCCCAAGTTCTCAGTGTGTGTCCTGGGGGACCAGCAGCACTGCGATGAGGCCAAGG  |
| consensus |     | * *****                                                       |
| Mouse     | 245 | CCGTGGATATCCCCACATGGACATCGAGGCGCTCAAGAAGCTTAACAAAAACAAGAAGT   |
| Vole      | 293 | CCGTGGATATCCCCACATGGACATCGAGGCGCTGAAGAAGCTCAATAAGAACAAGAAGT   |
| consensus |     | ***** ** *                                                    |
| Mouse     | 305 | TGGTCAAGAAGCTGGCTAAGAAGTACGATGCCTTTTGGCCTCTGAGTCTCTGATTAAGC   |
| Vole      | 353 | TGGTCAAAAAGCTGGCCAAGAAGTATGACGCCTTTCTGGCCTCTGAGTCTCTGATCAAGC  |
| consensus |     | ***** ***** *                                                 |
| Mouse     | 365 | AGATCCCACGTATCCTGGGCCCAGGCCTAAACAAGGCTGGCAAGTTCCCCTCCCTGCTGA  |
| Vole      | 413 | AGATCCCGCGTATCCTGGGCCCAGGCCTGAACAAGGCTGGCAAGTTCCCTTCCCTGCTGA  |
| consensus |     | ***** *****                                                   |
| Mouse     | 425 | CACACAATGAAAACATGGTGGCCAAAGTGGATGAGGTGAAATCGACAATCAAGTTCCAGA  |
| Vole      | 473 | CACACAATGAAAACATGGTGGCCAAAGTGGACGAGGTGAAAGTCCACGATCAAGTTCCAGA |
| consensus |     | ***** ***** ** *                                              |
| Mouse     | 485 | TGAAGAAGGTGCTGTGTTTGGCCGTCGCTGTTGGCCACGTGAAGATGACCGATGATGAGC  |
| Vole      | 533 | TGAAGAAGGTGCTGTGCTGGCTGTGCTGTCGGCCACGTGAAGATGACCGACGACGAGC    |
| consensus |     | ***** ***** ***** *                                           |
| Mouse     | 545 | TAGTCTACAACATTTCATCTGGCTGTCAATTTCTTGGTGTCTTGTCTTAAGAAAACTGGC  |
| Vole      | 593 | TGGTCTACAACATCCACTTGGCTGTCAATTTCTTGGTGTCTTGTCTAAGAAGAAGTGGC   |
| consensus |     | * ***** *****                                                 |
| Mouse     | 605 | AAAACGTGCGGGCTCTGTACATCAAGAGCACCATGGGCAAGCCCCAGCGTCTGTATTAGG  |
| Vole      | 653 | AAAATGTCCGGGCTTTGTATATCAAGAGCACCATGGGCAAGCCCCAGCGTCTTTACTAGG  |
| consensus |     | **** * ***** ***** *                                          |
| Mouse     | 665 | ATGCTCCAATAAACCT                                              |
| Vole      | 713 | ATGCCCCAATAAACCT                                              |
| consensus |     | **** *****                                                    |

B

|           |     |                                                              |
|-----------|-----|--------------------------------------------------------------|
| Mouse     | 10  | MSSKVSRTLYEAVREVLHGNQRKRKFLETVELQISLKNYDPQDKRFSGTVRLKSTPR    |
| Vole      | 1   | MSSKVSRTLYEAVREVLHGNQRKRKFLETVELQISLKNYDPQDKRFSGTVRLKSTPR    |
| consensus |     | *****                                                        |
| Mouse     | 61  | PKFSVCVLGDQQHCDEAKAVDIPHMDIEALKKLNKNKKLVKKLAKKYDAFLASESLIKQI |
| Vole      | 190 | PKFSVCVLGDQQHCDEAKAVDIPHMDIEALKKLNKNKKLVKKLAKKYDAFLASESLIKQI |
| consensus |     | *****                                                        |
| Mouse     | 370 | PRILGPGLNKAGKFPSLLTHNENMVAKVDEVKSTIKFQMKKVLCLAVAVGHVKMTDDELV |
| Vole      | 121 | PRILGPGLNKAGKFPSLLTHNENMVAKVDEVKSTIKFQMKKVLCLAVAVGHVKMTDDELV |
| consensus |     | *****                                                        |
| Mouse     | 550 | YNIHLAVNFLVSLKKNWQNVRALYIKSTMGKQPRLY                         |
| Vole      | 181 | YNIHLAVNFLVSLKKNWQNVRALYIKSTMGKQPRLY                         |
| consensus |     | *****                                                        |
