# Supplementary material for: Prolonged partner separation erodes nucleus accumbens transcriptional signatures of pair bonding in male prairie voles
Source: eLife journal article supplement (doi:10.7554/elife.80517), 2023-02-28
Supplement: supp [file elife-80517-supp-v1.zip]

Archive with 15 entries (15 files):
- elife_poa_e80517_Figure_1_figure_supplement_1.pdf
- elife_poa_e80517_Figure_1_figure_supplement_2.pdf
- elife_poa_e80517_Figure_1_figure_supplement_3.pdf
- elife_poa_e80517_Figure_2_figure_supplement_1.pdf
- elife_poa_e80517_Figure_2_figure_supplement_2.pdf
- elife_poa_e80517_Figure_3_figure_supplement_1.pdf
- elife_poa_e80517_Figure_3_figure_supplement_2.tif
- elife_poa_e80517_Figure_3_figure_supplement_3.pdf
- elife_poa_e80517_Figure_3_figure_supplement_4.pdf
- elife_poa_e80517_Figure_3_figure_supplement_5.pdf
- elife_poa_e80517_Figure_4_figure_supplement_1.pdf
- elife_poa_e80517_Figure_4_figure_supplement_2.pdf
- elife_poa_e80517_Supplementary_file_1.xlsx
- elife_poa_e80517_Supplementary_file_2.xlsx
- elife_poa_e80517_Supplementary_file_3.xlsx
