# Supplementary material for: Prolonged partner separation erodes nucleus accumbens transcriptional signatures of pair bonding in male prairie voles
Source: eLife journal article supplement (doi:10.7554/elife.80517), 2023-02-28

A

Pair bond over time

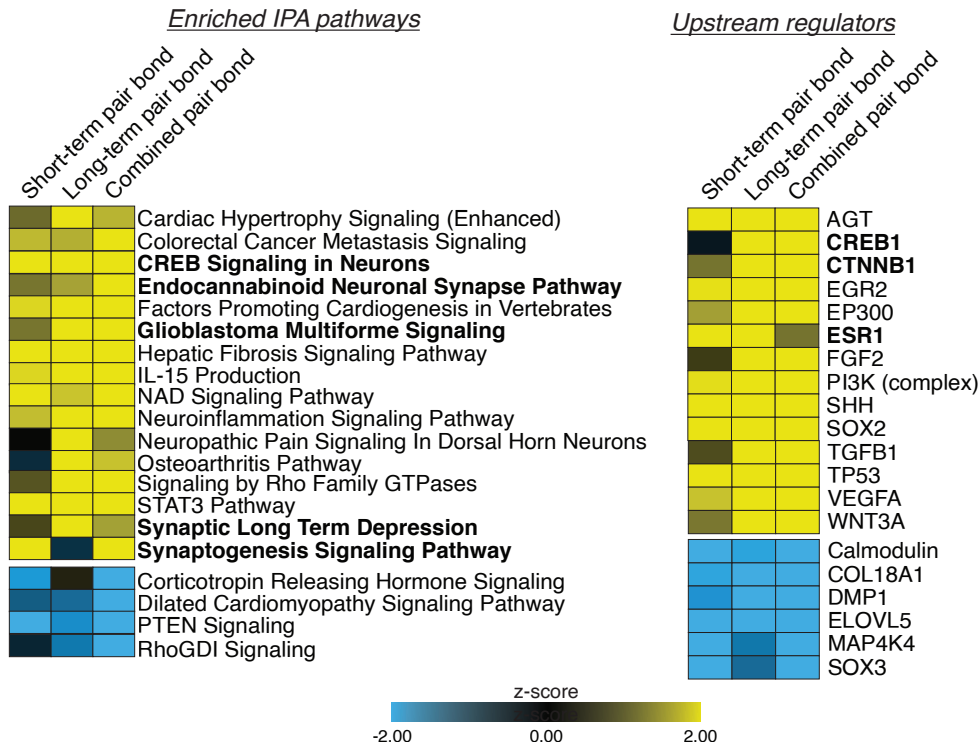

B

Partner loss over time

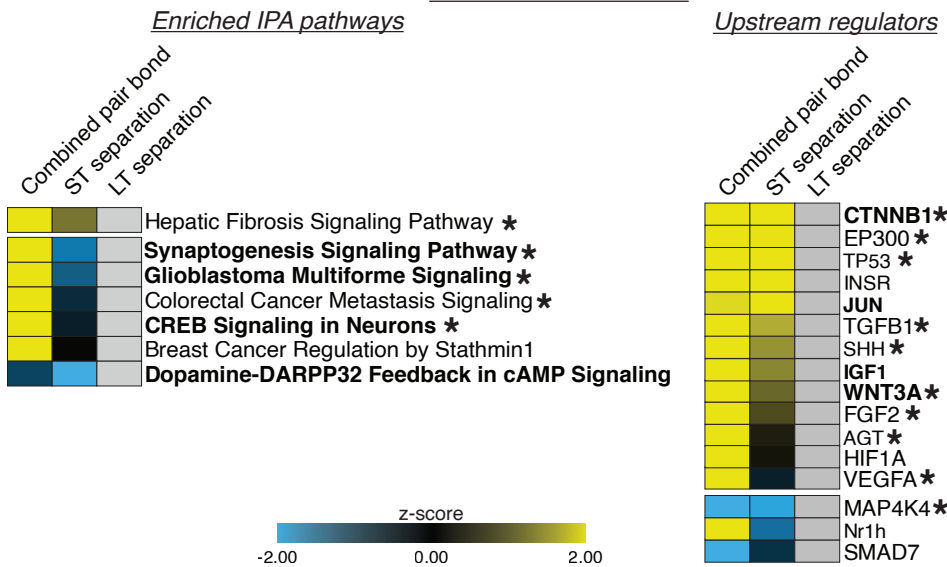

C

Eroded genes from RRHO

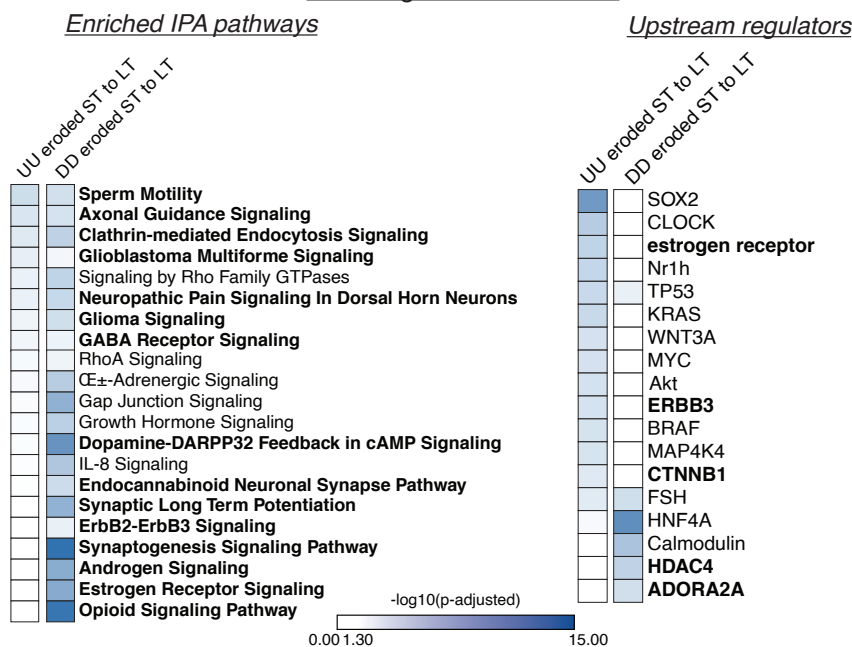

D

Neuronal enriched clusters

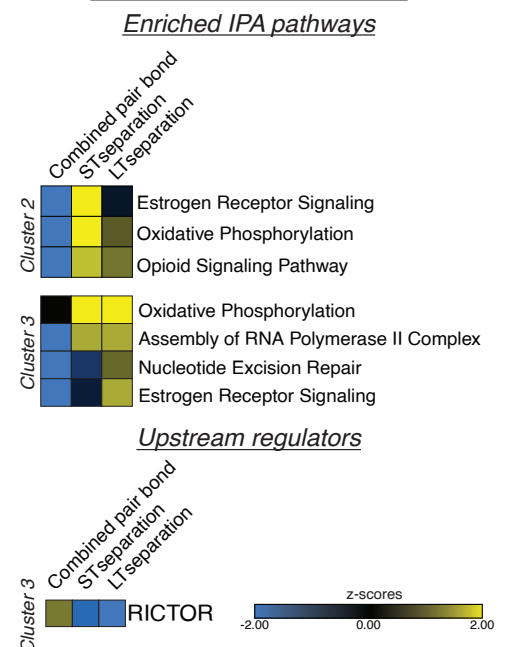

Supplement: supp [file elife-80517-supp-v1.zip › elife_poa_e80517_Figure_2_figure_supplement_2.pdf]
