# Supplementary material for: Prolonged partner separation erodes nucleus accumbens transcriptional signatures of pair bonding in male prairie voles
Source: eLife journal article supplement (doi:10.7554/elife.80517), 2023-02-28
Supplement: supp [file elife-80517-supp-v1.zip › elife_poa_e80517_Supplementary_file_1.xlsx]

## Sheet: Behavior stats
Experiment	Pairing Type (OS or SS)	Condition	Measurement	Statistical Test	Comparison	° of freedom, error	F or T or Chi Sq	p	*	Eta or correlation	Group Size	Residuals	Fig.	Notes		Signif. codes: 0 ‘***’ 0.001 ‘**’ 0.01 ‘*’ 0.05 ‘.’ 0.1 ‘ ’ 1
Partner Preference Test (PPT)	Both	Remain Paired	% partner huddle	2-way RM-ANOVA	Timepoint (RM)	2	1.79	0.179		0.07827	16	42
					Pairing Type	1	0.003	0.956		6.827e-05							Signif. codes: 0 ‘***’ 0.001 ‘**’ 0.01 ‘*’ 0.05 ‘.’ 0.1 ‘ ’ 1
					Timepoint*PairingType	2	0.078	0.925		0.003418
	Both	Separated 48 hours	% partner huddle	2-way RM-ANOVA	Timepoint (RM)	1	0.22	0.643		0.00723		28
					Pairing Type	1	0.381	0.542		0.0125							Signif. codes: 0 ‘***’ 0.001 ‘**’ 0.01 ‘*’ 0.05 ‘.’ 0.1 ‘ ’ 1
					Timepoint*PairingType	1	1.866	0.183		0.0612
	Both	Separated 4 weeks	% partner huddle	2-way RM-ANOVA	Timepoint (RM)	1	0.157	0.695		0.00564		26
					Pairing Type	1	1.702	0.203		0.061							Signif. codes: 0 ‘***’ 0.001 ‘**’ 0.01 ‘*’ 0.05 ‘.’ 0.1 ‘ ’ 1
					Timepoint*PairingType	1	0.057	0.813		0.00204
	OS	Remain Paired	% partner huddle, Baseline	one-tailed, t-test	mu = 50%	7	3.935	0.00564	***		8		Fig. 1B
	OS		% partner huddle, Short-term (48hrs)	one-tailed, t-test	mu = 50%	7	3.449	0.0107	**
	OS		% partner huddle, Long-term (4wks)	one-tailed, t-test	mu = 50%	7	16.785	6.519e-07	***
	SS		% partner huddle, Baseline	one-tailed, t-test	mu = 50%	7	3.56	0.00922	***
	SS		% partner huddle, Short-term (48hrs)	one-tailed, t-test	mu = 50%	7	3.214	0.01478	**
	SS		% partner huddle, Long-term (4wks)	one-tailed, t-test	mu = 50%	7	16.797	6.486e-07	***
	OS	Separated 48 hours	% partner huddle, Baseline	one-tailed, t-test	mu = 50%	7	96.839	3.299e-12	***
	OS		% partner huddle, Short-term (48hrs)	one-tailed, t-test	mu = 50%	7	17.961	4.097e-07	***
	SS	Separated 48 hours	% partner huddle, Baseline	one-tailed, t-test	mu = 50%	7	8.21	7.722e-05	***
	SS		% partner huddle, Short-term (48hrs)	one-tailed, t-test	mu = 50%	7	25.481	3.663e-08	***
	OS	Separated 4 weeks	% partner huddle, Baseline	one-tailed, t-test	mu = 50%	7	5.0354	0.001504	***
	OS		% partner huddle, Long-term (4wks)	one-tailed, t-test	mu = 50%	7	4.855	0.001846	***
	SS	Separated 4 weeks	% partner huddle, Baseline	one-tailed, t-test	mu = 50%	7	9.4783	3.042e-05	***
	SS		% partner huddle, Long-term (4wks)	one-tailed, t-test	mu = 50%	7	26.039	3.141e-08	***
	Both	Remain Paired	partner huddle duration	2-way RM-ANOVA	Timepoint (RM)	2	4.923	0.012	*	0.1699	16	42	Fig. 1C	post-hoc avaliable
					Pairing Type	1	2.683	0.109		0.0463
					Timepoint*PairingType	2	1.712	0.193		0.05907
	Both	Separated 48 hours	partner huddle duration	2-way RM-ANOVA	Timepoint (RM)	1	0.669	0.42		0.0215		28	Fig. 1D
					Pairing Type	1	2.029	0.165		0.0653
					Timepoint*PairingType	1	0.363	0.552		0.0117
	Both	Separated 4 weeks	partner huddle duration	2-way RM-ANOVA	Timepoint (RM)	1	0.818	0.374		0.0296		26
					Pairing Type	1	0.523	0.476		0.0189
					Timepoint*PairingType	1	0.274	0.605		0.0099
	Both	Remain Paired	novel huddle duration	2-way RM-ANOVA	Timepoint (RM)	2	1.053	0.358		0.0457		42	Fig. 1C
					Pairing Type	1	0.42	0.52		0.00913
					Timepoint*PairingType	2	0.76	0.474		0.033
	Both	Separated 48 hours	novel huddle duration	2-way RM-ANOVA	Timepoint (RM)	1	0.043	0.837		0.00149		28	Fig. 1E
					Pairing Type	1	0.057	0.813		0.00194
					Timepoint*PairingType	1	1.098	0.304		0.0376
	Both	Separated 4 weeks	novel huddle duration	2-way RM-ANOVA	Timepoint (RM)	1	0.046	0.8313		0.00158		26
					Pairing Type	1	3.011	0.0945	.	0.103
					Timepoint*PairingType	1	0.288	0.5962		0.0098
	OS	Remain paired vs Separated 48hrs	% partner huddle change score (ST - Base)	Levene's test	pHuddle_ChangeScore ~ Condition	1	1.8026	0.2008			8
	OS	Remain paired vs Separated 4wks	% partner huddle change score (LT - Base)		pHuddle_ChangeScore ~ Condition	1	0.1479	0.7068
	SS	Remain paired vs Separated 48hrs	% partner huddle change score (ST - Base)	Levene's test	pHuddle_ChangeScore ~ Condition	1	0	0.9952
	SS	Remain paired vs Separated 4wks	% partner huddle change score (LT - Base)		pHuddle_ChangeScore ~ Condition	1	1.6428	0.2208
	OS	Remain paired vs Separated 48hrs	raw partner huddle change score (ST - Base)	Levene's test	abspHuddle_ChangeScore ~ Condition	1	3.6963	0.0751	.
	OS	Remain paired vs Separated 4wks	raw partner huddle change score (LT - Base)		abspHuddle_ChangeScore ~ Condition	1	4.2826	0.059	.
	SS	Remain paired vs Separated 48hrs	raw partner huddle change score (ST - Base)	Levene's test	abspHuddle_ChangeScore ~ Condition	1	0.4981	0.4919
	SS	Remain paired vs Separated 4wks	raw partner huddle change score (LT - Base)		abspHuddle_ChangeScore ~ Condition	1	0.4738	0.5025
	OS	Remain paired	% partner huddle change score (ST - Base)	t-test	mu = 0	7	0.175	0.8661					Fig. S2A
	OS	Remain paired	% partner huddle change score (LT - Base)	t-test	mu = 0	7	1.599	0.154
	SS	Remain paired	% partner huddle change score (ST - Base)	t-test	mu = 0	7	0.906	0.395
	SS	Remain paired	% partner huddle change score (LT - Base)	t-test	mu = 0	7	2.578	0.0366	*
	OS	Remain paired	raw partner huddle change score (ST - Base)	t-test	mu = 0	7	1.255	0.2496					Fig. S2B
	OS	Remain paired	raw partner huddle change score (LT - Base)	t-test	mu = 0	7	6.0248	0.000529	***
	SS	Remain paired	raw partner huddle change score (ST - Base)	t-test	mu = 0	7	2.2206	0.0618	.
	SS	Remain paired	raw partner huddle change score (LT - Base)	t-test	mu = 0	7	2.2458	0.05956	.
	OS	Separated 48 hours	% partner huddle change score (ST - Base)	t-test	mu = 0	7	-1.036	0.335					Fig. S2A
	OS	Separated 4 weeks	% partner huddle change score (LT - Base)	t-test	mu = 0	6	0.0755	0.9422
	SS	Separated 48 hours	% partner huddle change score (ST - Base)	t-test	mu = 0	7	0.94907	0.3742
	SS	Separated 4 weeks	% partner huddle change score (LT - Base)	t-test	mu = 0	7	0.866	0.415
	OS	Separated 48 hours	raw partner huddle change score (ST - Base)	t-test	mu = 0	7	0.47999	0.6459					Fig. S2B
	OS	Separated 4 weeks	raw partner huddle change score (LT - Base)	t-test	mu = 0	6	0.25016	0.8108
	SS	Separated 48 hours	raw partner huddle change score (ST - Base)	t-test	mu = 0	7	1.7038	0.1322
	SS	Separated 4 weeks	raw partner huddle change score (LT - Base)	t-test	mu = 0	7	2.4213	0.046	*
	OS	Remain Paired	latency to huddle with partner	log-rank test	Timepoint	2	5	0.08					Fig. S1A
	OS	Remain Paired	latency to huddle with novel	log-rank test	Timepoint	2	3.8	0.1					Fig. S1D
	SS	Remain Paired	latency to huddle with partner	log-rank test	Timepoint	2	1.4	0.5					Fig. S1A
	SS	Remain Paired	latency to huddle with novel	log-rank test	Timepoint	2	0.9	0.6					Fig. S1D
	OS	Separated 48 hours	latency to huddle with partner	log-rank test	Timepoint	1	0	0.8					Fig. S1B
	OS	Separated 48 hours	latency to huddle with novel	log-rank test	Timepoint	1	0.1	0.7					Fig. S1E
	SS	Separated 48 hours	latency to huddle with partner	log-rank test	Timepoint	1	4	0.05	*				Fig. S1B
	SS	Separated 48 hours	latency to huddle with novel	log-rank test	Timepoint	1	0.4	0.5					Fig. S1E
	OS	Separated 4 weeks	latency to huddle with partner	log-rank test	Timepoint	1	0	0.9					Fig. S1D
	OS	Separated 4 weeks	latency to huddle with novel	log-rank test	Timepoint	1	1.4	0.2					Fig. S1E
	SS	Separated 4 weeks	latency to huddle with partner	log-rank test	Timepoint	1	0.3	0.6					Fig. S1D
	SS	Separated 4 weeks	latency to huddle with novel	log-rank test	Timepoint	1	1.7	0.2					Fig. S1E

## Sheet: Behavior post hocs
Experiment	Pairing Type (OS or SS)	Measurement	Statistical Test	Significant comparison	Post-hoc comparison(s)	Adjusted p-value	*	Notes
PPT	Both	Remain paired; partner huddle duration	2-way RM-ANOVA	Timepoint (RM)	4wks:Baseline	0.0107	*	Only significant comparison is shown

## Sheet: Transcription stats
Analysis	Measurement	Statistical Test	Comparison	Set comparison	Set size	Expected overlap	p	*	Fig.	Notes		Experiment	Pairing Type (OS or SS)	Measurement	Statistical Test	Comparison	° of freedom, error	F or T or Chi Sq	p	*	Group Size	Fig.	Notes
DESeq2	upregulated and downregulated DEGs	Fisher's Exact Test	Upreg ST paired: Upreg LT paired: Downreg ST paired: Downreg LT paired	Upreg ST:Upreg LT	104	30.2436	5.35976e-31	*	S4E			PPT	OS	Baseline partner huddle %; Paired	one-tailed, t-test	mu = 50%	14	11.758	1.214e-08	***	n = 15	2B
				Downreg ST:Downreg LT	46	13.3205	7.05118e-14	*					OS	Baseline partner huddle %; Separated			11	11.559	1.708e-07	***	n = 12	3B
				Upreg ST:Downreg LT	5	19.0423	0.999981						SS	Baseline partner huddle %; Paired			10	7.7822	1.498e-05	***	n = 11	2B
	up/downregulated DEGs	Fisher's Exact Test	DEGs combined pair bond: DEGs ST sep: DEGs LT sep	combined PBond:ST	87	31.8626	6.78097e-19	*	S4F				SS	Baseline partner huddle %; Separated			9	6.0673	0.0001865	***	n = 10	3B
				combined PBond:LT	18	17.9589	0.532764						Both	Baseline partner huddle %; Paired	two-tailed, t-test	OS vs SS	21.016	1.3735	0.184		n = 26	2B
				ST:LT	7	5.06102	0.243731							Baseline partner huddle %; Separated			14.332	0.329	0.747		n = 22	3B
				combined PBond:ST:LT	3	0.488658	0.0132968	*
	upregulated DEGs	Fisher's Exact Test	DEGs combined pair bond: DEGs ST: DEGs LT	combined PBond:ST	84	17.2629	8.92657e-37	*
				combined PBond:LT	13	5.77836	0.00456427	*
				ST:LT	4	1.57652	0.073052	.
				combined PBond:ST:LT	3	0.113871	0.000215183	*
	downregulated DEGs	Fisher's Exact Test	DEGs combined pair bond: DEGs ST: DEGs LT	combined PBond:ST	2	2.21347	0.65341
				combined PBond:LT	3	2.57833	0.478534
				ST:LT	2	0.79535	0.188919
				combined PBond:ST:LT	N/A
RRHO	UU quadrants	Fisher's Exact Test	(1) ST vs LT Paired UU:(2) Collapsed Pbond vs ST sep UU:(3) Collapsed Pbond vs LT sep UU	1:2	1701	603.11	0	*	3F	Very significant
				2:3	1169	300.09	0	*
				1:3	1120	390.46	0	*
				1:2:3	900	76.33	0	*
	DD quadrants	Fisher's Exact Test	(1) ST vs LT Paired DD:(2) Collapsed Pbond vs ST sep DD:(3) Collapsed Pbond vs LT sep DD	1:2	2078	1064.45	0	*	3G
				2:3	1191	454.12	3.04e-102	*
				1:3	830	455.39	0	*
				1:2:3	665	134.72	0	*

## Sheet: Behavior animals
Experimental Vole	Experimental sex	Condition	Cohort	PairingType	Experimental Parents	Partner	Partner sex	Partner manipulation	Partner Parents	Notes
5226	M	Remain paired	1	OS	parents: x87	5294	F	tubal ligation	parents: x95
5231	M	Remain paired	1	OS	parents: x94	5292	F	tubal ligation	parents: x95
5293	M	Remain paired	1	OS	parents: x95	5288	F	tubal ligation	parents: x104
5281	M	Remain paired	1	OS	parents: x90	5295	F	tubal ligation	parents: x95
5290	M	Remain paired	1	SS	parents: x95	5291	M	none	parents: x95
5262	M	Remain paired	1	SS	parents: x101	5265	M	none	parents: x101
5266	M	Remain paired	1	SS	parents: x101	5263	M	none	parents: x101
5238	M	Remain paired	1	SS	parents: x79	5240	M	none	parents: x79
5424	M	Remain paired	2	OS	parents: x95	5405	F	tubal ligation	parents: x101
5425	M	Remain paired	2	OS	parents: x95	5406	F	tubal ligation	parents: x101
5428	M	Remain paired	2	OS	parents: x95	5407	F	tubal ligation	parents: x101
5430	M	Remain paired	2	OS	parents: x98	5408	F	tubal ligation	parents: x101
5447	M	Remain paired	2	SS	parents: x99	5448	M	none	parents: x99
5454	M	Remain paired	2	SS	Parents: OXT #5	5457	M	none	Parents: OXT #5
5461	M	Remain paired	2	SS	Parents: x101	5465	M	none	Parents: x101
5467	M	Remain paired	2	SS	parents: x97	5469	M	none	parents: x97
5269	M	48 hours separated	1	OS	parents: x89	5183	F	tubal ligation	parents: x95
5247	M	48 hours separated	1	OS	parents: X103	5186	F	tubal ligation	parents: x95
5190	M	48 hours separated	1	OS	parents: x104	5189	F	tubal ligation	parents: x95
5188	M	48 hours separated	1	OS	parents: x95	5192	F	tubal ligation	parents: x104
5191	M	48 hours separated	1	SS	parents: x104	5194_1	M	none	parents: x104
5210	M	48 hours separated	1	SS	parents: x99	5213	M	none	parents: x99
5197	M	48 hours separated	1	SS	parents: x91	5199	M	none	parents: x91
5249	M	48 hours separated	1	SS	parents: X103	5253	M	none	parents: X103
5401	M	48 hours separated	2	OS	parents: x103	5411	F	tubal ligation	parents: x97
5402	M	48 hours separated	2	OS	parents: x103	5410	F	tubal ligation	parents: x97
5404	M	48 hours separated	2	OS	parents: x103	5413	F	tubal ligation	parents: x97
5409	M	48 hours separated	2	OS	parents: x101	5414	F	tubal ligation	parents: x97
5391	M	48 hours separated	2	SS	parents: x87	5393	M	none	parents: x87
5420	M	48 hours separated	2	SS	Parents: x102	5422	M	none	Parents: x102
5380	M	48 hours separated	2	SS	parents: x91	5383	M	none	parents: x91
5369	M	48 hours separated	2	SS	parents: x95	5370	M	none	parents: x95
5315	M	4 weeks separated	1	OS	parents: x86	5306	F	tubal ligation	parents: x91
5316	M	4 weeks separated	1	OS	parents: x86	5308	F	tubal ligation	parents: x91
5318	M	4 weeks separated	1	OS	parents: x86	5309	F	tubal ligation	parents: x91
5320	M	4 weeks separated	1	OS	parents: x86	5279	F	tubal ligation	parents: x90
5307	M	4 weeks separated	1	SS	parents: x91	5350	M	none	parents: x91
5296	M	4 weeks separated	1	SS	parents: x102	5297	M	none	parents: x102
5285	M	4 weeks separated	1	SS	parents: x104	5286	M	none	parents: x104
5287	M	4 weeks separated	1	SS	parents: x104	5289	M	none	parents: x104
5477	M	4 weeks separated	2	OS	parents: x95	5453	F	tubal ligation	Parents: OXT #5
5480	M	4 weeks separated	2	OS	parents: x98	5455	F	tubal ligation	Parents: OXT #5
5471	M	4 weeks separated	2	OS	parents: x97	5456	F	tubal ligation	Parents: OXT #5
5474	M	4 weeks separated	2	OS	parents: x102	5459	F	tubal ligation	Parents: x103
5491	M	4 weeks separated	2	SS	parents: x103	5493	M	none	parents: x103
5497	M	4 weeks separated	2	SS	parents: x101	5499	M	none	parents: x101
5502	M	4 weeks separated	2	SS	parents: x102	5504	M	none	parents: x102
5503	M	4 weeks separated	2	SS	parents: x102	5506	M	none	parents: x102

## Sheet: Transcription animals
Animal	IorP	Cohort	Pairing	Timepoint	Separation	ProcessingGroup	PartnerPreference	DissectionOrder	Parentage	ParentCode	AgeAtPairing	PairingAgeCat	RIN	InputRNA	Notes		Column descriptions
2756	Input	SS48P	SS	48	Paired	11	92.6457	1	2136 and 2147	12	143	high	3.7	150			Animal	Experimental animal number
2766	Input	SS48P	SS	48	Paired	11	90.1296	3	1743 and 1740	13	140	med	9	150			IorP	If this animal was part of the TRAP portion of the study they will have both input and pulldown samples associated
2887	Input	SS48P	SS	48	Paired	13	63.7464	5	1750 and 1767	7	145	high	9.3	150			Cohort	Which experimental cohort the animal was a part of
2911	Input	SS48P	SS	48	Paired	13	94.9268	3	2126 and 2125	14	113	med	9.4	150			ProcessingGroup	Refers to animals that were processed together. As in, all manipulations/harvesting was done on the same day for all animals in the same processing group
2919	Input	SS48P	SS	48	Paired	14	68.5325	3	2029 and 2146	17	112	med	9.2	150			DissectionOrder	Which animal was dissected first to last when collecting tissue for RNA isolation
2920	Input	SS48P	SS	48	Paired	14	99.2347	1	2029 and 2146	17	112	med	9.2	150			Parentage	Parents of the experimental animal
2723	Input	SS48I	SS	48	Isolated	12	87.3908	2	2142 and 2103	2	163	high	8.7	150			Parent code	For ease with data processing, assigning a numeric identifer to each parent pair. As in, parent code 1 and 2 are from two different sets of parents
2750	Input	SS48I	SS	48	Isolated	13	98.8026	1	2126 and 2125	14	158	high	9.1	150			Age at pairing	Age of experimental animal at first pairing
2780	Input	SS48I	SS	48	Isolated	12	100	1	2080 and 2117	15	152	high	8.8	150			PairingAgeCat	If animals age at pairing was categorized as "high," "med," or "low" based on distribution in a histogram.
2921	Input	SS48I	SS	48	Isolated	14	64.2783	4	2080 and 2117	15	112	med	9.1	150			RIN	RNA integrity value
2939	Input	SS48I	SS	48	Isolated	11	90.8371	8	2096 and 2151	10	74	low	9.1	150			Input RNA	Amount of RNA used to make libraries
2945	Input	SS48I	SS	48	Isolated	11	20.0838	6	2126 and 2125	14	74	low	9.2	150	Excluded for Partner preference < 50%		Partner preference	Partner preference score calculated as: ((time with partner)/(time with partner + time with novel))*100
2728	Input	OS48P	OS	48	Paired	13	76.3456	2	2142 and 2103	2	166	high	8.3	150
2736	Input	OS48P	OS	48	Paired	14	79.5306	5	1772 and 1739	6	168	high	8.8	150			Abbreviations
2737	Input	OS48P	OS	48	Paired	14	98.1115	2	1772 and 1739	6	168	high	8.9	150			OS4I	Opposite-sex, 4 weeks, Isolated
2758	Input	OS48P	OS	48	Paired	11	61.0861	7	2136 and 2147	12	143	high	8.6	150			OS4P	Opposite-sex, 4 weeks, Paired
2762	Input	OS48P	OS	48	Paired	12	94.7139	3	2096 and 2151	10	154	high	8.7	150			OS48I	Opposite-sex, 48 hrs, Isolated
2801	Input	OS48P	OS	48	Paired	12	86.4026	5	1649 and 1651	3	142	high	9.2	150			OS48P	Opposite-sex, 48 hrs, Paired
2898	Input	OS48I	OS	48	Isolated	11	59.4453	4	2136 and 2147	12	107	med	9	150			SS4I	Sibling, 4 weeks, Isolated
2906	Input	OS48I	OS	48	Isolated	12	94.182	4	2142 and 2103	2	110	med	9.3	150			SS4P	Sibling, 4 weeks, Paired
2909	Input	OS48I	OS	48	Isolated	13	88.6548	4	2126 and 2125	14	113	med	9.1	150			SS48I	Sibling, 48 hrs, Isolated
2910	Input	OS48I	OS	48	Isolated	11	84.617	2	2126 and 2125	14	98	low	9.2	150			SS48P	Sibling, 48 hrs, Paired
2913	Input	OS48I	OS	48	Isolated	14	93.2916	7	2024 and 2034	16	114	med	9	150
2917	Input	OS48I	OS	48	Isolated	14	93.4642	6	2024 and 2034	16	114	med	9.2	150
2954	Input	SS4P	SS	4	Paired	15	72.1327	3	2029 and 2146	17	70	low	8.6	20
2959	Input	SS4P	SS	4	Paired	15	62.4844	2	2080 and 2117	15	70	low	8.8	20
2973	Input	SS4P	SS	4	Paired	15	89.9018	5	2142 and 2103	2	59	low	8.9	40
2977	Input	SS4P	SS	4	Paired	15	74.3493	1	2084 and 2114	8	55	low	8.6	20
2984	Input	SS4P	SS	4	Paired	15	83.1881	4	2126 and 2125	14	52	low	8.6	20
2594	Input	SS4I	SS	4	Isolated	1	100	1	1668 and 1592	1	110	med	9	150
2599	Input	SS4I	SS	4	Isolated	2	56.43	1	2142 and 2103	2	113	med	8.6	150
2647	Input	SS4I	SS	4	Isolated	7	58.57	3	1776 and 1732	9	123	med	8.5	150
2660	Input	SS4I	SS	4	Isolated	9	84.31	1	2126 and 2125	11	124	med	8.9	150
2665	Input	SS4I	SS	4	Isolated	10	99.69	3	2136 and 2147	12	125	med	8.6	150
2601	Input	OS4P	OS	4	Paired	1	97.87	2	2142 and 2103	2	107	med	8.7	150
2604	Input	OS4P	OS	4	Paired	2	99.03	2	2142 and 2103	2	113	med	8.6	150
2611	Input	OS4P	OS	4	Paired	3	71.48	2	1649 and 1651	3	111	med	8.9	150
2615	Input	OS4P	OS	4	Paired	4	98.24	2	1770 and 1774	5	112	med	8.8	150
2638	Input	OS4P	OS	4	Paired	5	93.44	1	1750 and 1767	7	119	med	7.3	150
2644	Input	OS4P	OS	4	Paired	7	93.82	2	2084 and 2114	8	125	med	8.6	150
2656	Input	OS4P	OS	4	Paired	8	98.66	2	2096 and 2151	10	125	med	8.4	150
2662	Input	OS4P	OS	4	Paired	9	99.28	2	2126 and 2125	11	124	med	8.7	150
2669	Input	OS4P	OS	4	Paired	10	73.18	4	2136 and 2147	12	125	med	9.2	150
2612	Input	OS4I	OS	4	Isolated	3	87.21	1	1666 and 1660	4	111	med	8.8	150
2617	Input	OS4I	OS	4	Isolated	4	98.29	1	1770 and 1774	5	112	med	9	150
2639	Input	OS4I	OS	4	Isolated	5	85.52	3	1750 and 1767	7	119	med	8.4	150
2658	Input	OS4I	OS	4	Isolated	8	95	3	2096 and 2151	10	123	med	8.9	150
2659	Input	OS4I	OS	4	Isolated	7	75.21	1	2096 and 2151	10	121	med	9	150
2664	Input	OS4I	OS	4	Isolated	9	78.86	3	2136 and 2147	12	124	med	8.6	150
2594P	Pulldown	SS4I	SS	4	Isolated	1	100	1	1668 and 1592	1	110	med	7.8	10
2599P	Pulldown	SS4I	SS	4	Isolated	2	56.43	1	2142 and 2103	2	113	med	7.3	70
2647P	Pulldown	SS4I	SS	4	Isolated	7	58.57	3	1776 and 1732	9	123	med	7.3	10
2660P	Pulldown	SS4I	SS	4	Isolated	9	84.31	1	2126 and 2125	11	124	med	7.4	20
2665P	Pulldown	SS4I	SS	4	Isolated	10	99.69	3	2136 and 2147	12	125	med	7.5	70
2601P	Pulldown	OS4P	OS	4	Paired	1	97.87	2	2142 and 2103	2	107	med	7.2	20
2604P	Pulldown	OS4P	OS	4	Paired	2	99.03	2	2142 and 2103	2	113	med	7.4	20
2611P	Pulldown	OS4P	OS	4	Paired	3	71.48	2	1649 and 1651	3	111	med	8.3	20
2615P	Pulldown	OS4P	OS	4	Paired	4	98.24	2	1770 and 1774	5	112	med	7.5	70
2638P	Pulldown	OS4P	OS	4	Paired	5	93.44	1	1750 and 1767	7	119	med	6.6	70
2644P	Pulldown	OS4P	OS	4	Paired	7	93.82	2	2084 and 2114	8	125	med	7.6	10
2656P	Pulldown	OS4P	OS	4	Paired	8	98.66	2	2096 and 2151	10	125	med	7.5	10
2662P	Pulldown	OS4P	OS	4	Paired	9	99.28	2	2126 and 2125	11	124	med	7.7	40
2669P	Pulldown	OS4P	OS	4	Paired	10	73.18	4	2136 and 2147	12	125	med	7.9	20
2612P	Pulldown	OS4I	OS	4	Isolated	3	87.21	1	1666 and 1660	4	111	med	7.8	40
2617P	Pulldown	OS4I	OS	4	Isolated	4	98.29	1	1770 and 1774	5	112	med	7.6	20
2639P	Pulldown	OS4I	OS	4	Isolated	5	85.52	3	1750 and 1767	7	119	med	6.5	70
2658P	Pulldown	OS4I	OS	4	Isolated	8	95	3	2096 and 2151	10	123	med	7.2	40
2659P	Pulldown	OS4I	OS	4	Isolated	7	75.21	1	2096 and 2151	10	121	med	7.6	10
2664P	Pulldown	OS4I	OS	4	Isolated	9	78.86	3	2136 and 2147	12	124	med	7.4	40

## Sheet: Excluded animals
Behavior experiments				Transcriptional experiments
Animal	Cohort	Reason		Animal	Cohort	TRAP?	Sample Type	Reason
				2629	SS4I	Yes	Pulldown	fastQC: Low base sequence quality and quality of the tile was poor.
				2629	SS4I	Yes	Input	Since pulldown was removed I also removed the Input sample.
				2602	OS4I	Yes	Never collected	Baseline partner preference < 50%
				2607	SS4I	Yes	Never collected	Baseline partner preference < 50%
				2645	OS4I	Yes	Never collected	Baseline partner preference < 50%
				2653	SS4I	Yes	Never collected	Baseline partner preference < 50%
				2670	OS4I	Yes	Never collected	Baseline partner preference < 50%
				2764	SS48P	No	Never collected	Baseline partner preference < 50%
				2951	SS48P	No	Never collected	Baseline partner preference < 50%
				2989	SS4P	No	Never collected	Baseline partner preference < 50%
				2930	SS48I	No	Never collected	Baseline partner preference < 50%
				2912	OS48I	No	Never collected	Baseline partner preference < 50%
				2972	SS4P	No	Never collected	Baseline partner preference < 50%
				2902	OS48P	No	Never collected	Baseline partner preference < 50%
				2988	SS4P	No	Never collected	Baseline partner preference < 50%
				2731	OS48P	No	Never collected	Baseline partner preference < 50%
				2748	SS48I	No	Never collected	Baseline partner preference < 50%
				2722	OS48P	No	Never collected	Baseline partner preference < 50%
				2945	SS48I	No	Input	Baseline partner preference < 50%
