# Supplementary material for: Prolonged partner separation erodes nucleus accumbens transcriptional signatures of pair bonding in male prairie voles
Source: eLife journal article supplement (doi:10.7554/elife.80517), 2023-02-28
Supplement: supp [file elife-80517-supp-v1.zip › elife_poa_e80517_Supplementary_file_2.xlsx]

## Sheet: Res_ST_RP
genes	baseMean	log2FoldChange	lfcSE	stat	pvalue	padj
ENSMOCG00000000002	14430.048744173035	0.4720007667894822	0.6109354186186922	0.7725870074068757	0.43976683616809026	0.9827898691553396
ENSMOCG00000000004	35063.164797280784	0.6946698704691678	0.7085853063358596	0.9803616646545362	0.3269076257546013	0.9808680905137676
ND1	93023.29274790283	0.5030883211192679	0.7970087693846041	0.6312205592263664	0.5278963210354037	0.9827898691553396
ND2	65806.17229115787	0.19821754446624634	0.9068593432630007	0.21857584193049523	0.8269804731133353	0.9932301794244984
ENSMOCG00000000014	201.85459272638667	1.6004484622552544	0.6121927928735641	2.6142883106201387	0.008941354975814839	0.8015758669640056
COX1	101424.29191296597	0.6512910775154825	0.6675740774815383	0.9756086994457839	0.32925841183840154	0.9808680905137676
COX2	29618.927956533877	0.6672958718729317	0.7449003829860373	0.8958189405111902	0.37034947232079946	0.9827898691553396
ATP8	5024.172330062967	0.27129266974876837	1.1785706480699052	0.23018787222730583	0.8179457854095149	0.9932301794244984
ATP6	83763.12501572452	0.5344110637166769	0.776802498321461	0.6879625965048374	0.4914763357923051	0.9827898691553396
COX3	72797.96649693025	0.6613780003201494	0.7149042544737032	0.9251280799930912	0.3548992883065104	0.9827898691553396
ND3	8848.454946896338	0.34442487952975476	0.7836018869728025	0.4395406459016212	0.6602698372181439	0.9905110955795501
ND4L	5752.450089093122	0.4416391075028778	0.6620847088945482	0.6670432069640484	0.5047445351977866	0.9827898691553396
ND4	97402.99898054237	0.5884962669563438	0.8086772932886455	0.7277269583805276	0.46678074442402384	0.9827898691553396
ND5	28070.575483603956	0.6605957538876244	0.7270595289162353	0.9085855113849031	0.3635689573066071	0.9827898691553396
ND6	10439.137462888717	0.6538265759653296	0.6855701021560143	0.953697621744507	0.34023672436211116	0.9808680905137676
CYTB	54815.09124700645	0.598263704324925	0.7041541237542169	0.8496203943751203	0.3955361695458715	0.9827898691553396
ENSMOCG00000000037	180.05910022584257	0.968067110170627	0.879337584695115	1.1009049618938742	0.27093802229650477	0.9790994683758689
Atp6v1b2	10007.758594125055	-0.2509737924468501	0.19221785627554291	-1.3056736627375605	0.19166355811875385	0.9672440546260765
Leng1	274.91000816686477	-0.09972869488258063	0.11933298582019404	-0.8357177539565436	0.4033137050017443	0.9827898691553396
Klhl13	2159.8265495204037	-0.24170002745543345	0.2232940513097006	-1.0824293170273689	0.27906180725608315	0.9790994683758689
Zfp282	242.07937632690994	-0.15821217530163484	0.1480926935248063	-1.0683320799694516	0.28537074264491397	0.9790994683758689
ENSMOCG00000000053	44.41476991716866	0.46838329806352835	0.38317309777503955	1.2223804353261658	0.22156379434989448	0.9790994683758689
Nck1	406.36820040523804	-0.06365299624182219	0.17717378420662586	-0.3592687062979249	0.7193940824502578	0.9905110955795501
Tmem185a	189.47259912818492	-0.0930846111668275	0.19636342546870655	-0.4740425104351315	0.6354695932100489	0.9905110955795501
ENSMOCG00000000057	160.13790978535746	0.01687976230599038	0.24313540887081697	0.06942535595446304	0.9446510464757264	0.9969498598140254
Magel2	778.8057111738498	-0.07868911038216539	0.4261290525020593	-0.1846602805420903	0.8534955018529922	0.9937217263181438
Comtd1	54.91816627529032	0.17109303205206483	0.32989125271398956	0.5186346429148874	0.6040155461439354	0.9858063125051496
Aasdhppt	831.7921258243636	0.01929643814654269	0.1733200055776385	0.11133416527556522	0.9113513638342218	0.9967185265324758
Etv6	58.229970141869025	-0.30483858510941936	0.273646271485815	-1.1139877165299557	0.2652844563446117	0.9790994683758689
Rps6ka6	250.3283802634466	-0.19550990223846249	0.2332872946040677	-0.8380649386426272	0.40199423305017273	0.9827898691553396
ENSMOCG00000000071	7528.140285889058	0.008672995580206119	0.16782865724780888	0.05167767961939856	0.9587855225536889	0.9983627149610678
Cpsf7	1547.9966467142813	0.04389184539682094	0.09837249917193888	0.44618003777768467	0.6554672013613189	0.9905110955795501
Strip1	1109.2852947199574	-0.04332208541027369	0.1759944090946463	-0.24615603207585948	0.8055614498030061	0.9932301794244984
Rasa2	438.08217341442446	0.4229577783277724	0.2505203273659528	1.6883172027391136	0.09135035470406702	0.9261428818578334
Aldh9a1	336.93896341649776	0.0893058884506036	0.22746540835314127	0.3926130531107206	0.6946052972026697	0.9905110955795501
Slc16a4	30.867800744318583	1.1206482101952935	0.428166584267892	2.6173182386744474	0.008862367314835307	0.8015758669640056
1700109H08Rik	96.26387649824963	0.20992877256720702	0.23994793869556685	0.8748930026590204	0.3816321267531261	0.9827898691553396
Mpp1	767.5863819149391	0.15240335192404053	0.12027416605920492	1.2671328924369347	0.2051077760998619	0.970731939942315
Wdr83os	476.09709262785145	-0.24749811021306609	0.16226037475940955	-1.5253145481763013	0.12718066083134316	0.9511334148555968
Ankib1	1194.5346031525546	0.1756539126764207	0.11600925128471873	1.5141371117491096	0.12999106781476674	0.952587112058907
B3gnt2	444.2489890541815	-0.3579469831303594	0.241837460596539	-1.4801138841245427	0.13884285690232867	0.9564021971810307
Ankrd52	1127.7429370508676	0.20156624135893447	0.15612973631454932	1.291017624937544	0.19669756601798427	0.9672440546260765
Hgsnat	401.46235979657956	0.2512815137443929	0.21270621310243568	1.1813548371686726	0.23746179128965467	0.9790994683758689
Ttc25	41.7864311164038	-0.2314393149499116	0.4658035461284798	-0.4968603542706287	0.6192875307433683	0.9870832312028577
ENSMOCG00000000091	307.475578967904	0.034091227400329785	0.24121180398000755	0.14133316379141786	0.8876067516397994	0.9954333909839311
Tmem47	1161.2174439059527	0.3659221574635653	0.29499542970081055	1.240433310559048	0.2148151666503628	0.9757596783279401
Socs4	195.00231640350154	0.0650200538115073	0.19147645542712366	0.3395720568696973	0.7341788243481304	0.9909445947637578
Zc3h12b	563.8561739807516	-0.036414815085831255	0.25717830139775383	-0.1415936526834425	0.8874009808422798	0.9954333909839311
ENSMOCG00000000095	53.79469772598602	-0.12738205620028403	0.2674829270365777	-0.4762249972794144	0.6339140925953122	0.9902831134386583
Amigo1	345.8748941166274	0.19503341251206902	0.23725703500674214	0.8220342655235776	0.411057395387978	0.9827898691553396
Thtpa	1138.5104899303574	0.09099519296602174	0.11486155419444954	0.7922162781462598	0.42823457862326236	0.9827898691553396
Serpinb8	221.7686406303867	-0.6024380636858099	0.23569859853364666	-2.5559679498892316	0.010589287179352378	0.8278134354129378
Zdhhc13	245.42611687864408	0.0748610047254242	0.18377334124197822	0.40735508327539816	0.683747211566902	0.9905110955795501
ENSMOCG00000000103	1257.1816481189946	-0.05982283033377859	0.08764128197824833	-0.6825873490602979	0.49486763034959136	0.9827898691553396
Rgs7	1036.215240425535	-0.11394729562637199	0.22046057554474663	-0.5168601930064554	0.6052537574227209	0.9858063125051496
Mapk1ip1l	776.3969332812824	0.006685897920158641	0.09998264103168968	0.0668705872456353	0.9466847285877141	0.9969498598140254
ENSMOCG00000000106	1092.9971372687255	-0.1333212699075946	0.1867461352957289	-0.7139171565530321	0.4752784077932018	0.9827898691553396
Cfap99	41.354497600185866	0.15010905394425808	0.2937032248178166	0.5110909287338278	0.6092873875705513	0.9867397952499977
Tmem237	259.65813430209687	-0.002067831953997268	0.15055953395663257	-0.013734314258656578	0.989041947206338	0.9991581039407021
Pygb	2348.782159616095	0.21881696390736086	0.19707569705836073	1.1103193705440089	0.2668614288978655	0.9790994683758689
Pls3	1387.2714088611033	0.12954415136030822	0.26180905155990564	0.494803944280997	0.6207385198891396	0.987131271738163
Mogs	107.7572135162554	-0.019110980657890297	0.21002593305421755	-0.09099343295361939	0.9274978091537097	0.9969498598140254
ENSMOCG00000000120	80.99223018784271	0.21535497568559514	0.41770635946325074	0.515565470351767	0.6061579320714774	0.9860648191800567
Polr1a	406.14992280812294	0.18056335963138795	0.17439990628605906	1.0353409211999192	0.3005097255566195	0.9790994683758689
ENSMOCG00000000123	311.8956929349157	-0.02894067354245279	0.38283601264142236	-0.07559548367138501	0.9397409296924634	0.9969498598140254
Mfsd14b	298.76992767056527	-0.01566193307288697	0.17100198894626958	-0.09158918659015186	0.9270244431880169	0.9969498598140254
Aktip	1902.3303486863158	-0.06711482671501201	0.10193462308165646	-0.6584105055379322	0.5102743866139374	0.9827898691553396
ENSMOCG00000000129	70.40181793210003	0.0034324828301063796	0.35023136672683	0.009800615125325466	0.9921803656873254	0.9991581039407021
Borcs5	279.06367814704424	-0.2551091418839919	0.16178810164913074	-1.5768102801357184	0.11483918551226606	0.9402330488920683
Oprl1	451.6399919660569	0.12025606881903135	0.22152029790966185	0.54286704177363	0.5872213496834265	0.9852153260815123
Zxdb	305.04158572813515	-0.17706533305117572	0.22561153482646953	-0.7848239372484505	0.4325568033658834	0.9827898691553396
Psrc1	40.210098077363924	-0.2643057182281742	0.5021130763205862	-0.5263868452998063	0.5986194537017493	0.9858063125051496
Rnf150	94.19189500900382	-0.0686870726937894	0.30090622558890134	-0.22826736987366228	0.8194383900056085	0.9932301794244984
ENSMOCG00000000138	211.74052324204317	-0.3641639382264145	0.19987030440196005	-1.822001218820595	0.06845480071554287	0.9035269408723644
Ccdc74a	44.6961412156084	0.1923374829137618	0.35481702592550807	0.5420751228385021	0.5877667555480749	0.9852153260815123
Gpank1	1050.4442791928193	-0.035980002099026465	0.10398308132017912	-0.3460178486944311	0.7293293010193689	0.990650758600675
Rtl5	1134.8070843570522	-0.2904860906689162	0.2252505206186182	-1.2896134040939744	0.19718491940795735	0.9672440546260765
Atg14	402.42842203144914	-0.23504920827626105	0.12639996500561806	-1.8595670360020582	0.06294680671850982	0.8939331052483455
Thap2	160.37042274981243	-0.02231497045290249	0.20901063098932107	-0.10676476286051986	0.9149756028105483	0.9967783847173113
Gen1	98.30589022836818	-0.08804242859915787	0.31511022060567506	-0.27940200870010196	0.7799363297228334	0.9932301794244984
Erbin	1471.034877266192	0.2848327334697373	0.18544183317991086	1.5359680638693858	0.12454621317053377	0.9494006746274252
Ints1	1000.5399347425275	0.05275675092767993	0.19425833000854761	0.27158037920617645	0.7859446877282293	0.9932301794244984
Zfp746	412.75580338803644	-0.09153090410214584	0.1401099955369067	-0.6532789024180325	0.5135764911175784	0.9827898691553396
Tnrc6a	1817.823760663073	0.09215627159361832	0.1467675307990939	0.6279063979060092	0.5300652595423884	0.9827898691553396
Plin3	190.8891356130698	0.3302899861074383	0.3007991205533239	1.0980417279806722	0.2721862686205269	0.9790994683758689
Bcan	1294.5865258269764	0.329776780558075	0.30920758894976513	1.0665222728787929	0.28618761579252977	0.9790994683758689
Lims1	257.0159448970577	0.35961273508882285	0.20193622864539648	1.7808232703023739	0.07494132662837898	0.9066875931076556
Mrpl32	187.39737002186476	-0.2627355708389693	0.18792701082720706	-1.3980724201511743	0.16209132095238402	0.9612067070935637
Cnksr2	3757.6236640589054	-0.46648727385352867	0.3947226167639713	-1.1818103499563843	0.23728096013866903	0.9790994683758689
ENSMOCG00000000160	572.99300345447	-0.1674450793872213	0.13782286359546878	-1.2149296206665556	0.2243929352806942	0.9790994683758689
Rundc3b	1019.347263712091	-0.336844129504451	0.1461862949757583	-2.304211414348445	0.02121077877509815	0.8838432118634834
ENSMOCG00000000164	47.74647785184789	0.13782311648427706	0.3020594815014441	0.4562780674826065	0.6481900334684896	0.9905110955795501
Elf1	170.29145603961942	0.3657193373891546	0.3090695575163318	1.183291361103493	0.23669369537604276	0.9790994683758689
Tpgs1	248.25664354128034	-0.06857674881328908	0.2357276711466186	-0.29091514152632303	0.7711162206571083	0.9932301794244984
Zmat1	108.16259766295563	-0.32343731725710495	0.19632798392875217	-1.6474335995549214	0.09946895392757754	0.9347323746186648
Stat5a	48.77257534522068	0.6961990227545243	0.32134730653283733	2.1665002587578317	0.03027298010637496	0.8841458178596813
ENSMOCG00000000172	31.42224811604983	0.2711669256413303	0.356875719682113	0.7598357374462802	0.4473527780930462	0.9827898691553396
Hdac11	3779.0477244822982	0.017736944756992397	0.11212277006088384	0.1581921740549315	0.8743053703077621	0.9937217263181438
Gpatch1	334.12323962944674	-0.14776896827772754	0.1749903815739525	-0.8444405169508077	0.3984232894371745	0.9827898691553396
Isoc2a	89.85211836398798	-0.34313377620938945	0.3025567161876942	-1.1341138961745039	0.25674677535522283	0.9790994683758689
Sft2d2	215.59824201021488	0.18221606563212242	0.255916754693658	0.7120130366229516	0.4764567032682284	0.9827898691553396
ENSMOCG00000000177	196.7675298439265	-0.1816168795538641	0.22742802697321565	-0.7985685931982923	0.4245406048277996	0.9827898691553396
Daglb	268.5526069924142	-0.1159911781932183	0.1704295774433864	-0.6805812695965198	0.4961364819934881	0.9827898691553396
Parp10	43.14467739376493	0.5315650237829114	0.37020646419743136	1.4358609997134664	0.15104189801760914	0.9564021971810307
Ammecr1	77.43409799970696	0.1227585554539611	0.36250246401898134	0.338641989058406	0.7348794469197509	0.9909445947637578
B3galnt2	225.35026965307364	0.16944013304589983	0.19250367645769328	0.8801916730309193	0.3787554836736966	0.9827898691553396
Il17ra	40.689275608078006	0.3430881806621746	0.35609359458732825	0.9634775403915214	0.3353079299621843	0.9808680905137676
Parp3	37.194626209261926	0.5253349563864229	0.37387683953055473	1.4051016293120515	0.15999105969862837	0.9582181355369493
ENSMOCG00000000187	213.88295803636416	0.3906334831622185	0.3070426515113224	1.2722450162524528	0.2032860777397857	0.9698381137677526
ENSMOCG00000000188	29.566729075362	-0.06014930971763543	0.3409143075786008	-0.17643527531846834	0.8599519936328623	0.9937217263181438
Rala	1422.762980370159	-0.02797243082812235	0.17834232467065675	-0.1568468442910498	0.8753655533096765	0.9937217263181438
Gabrb2	489.746957910224	0.42340046810742643	0.3775078145713814	1.1215674265926154	0.2620464078129361	0.9790994683758689
Zscan25	287.8919732611554	-0.21287858108634397	0.1299779440450361	-1.6378054188377038	0.10146229083127464	0.9347323746186648
Fam160a2	761.7534786819682	0.001622736543446157	0.15017834742073585	0.010805396192701065	0.9913787089702314	0.9991581039407021
ENSMOCG00000000196	5195.680286729619	-0.25873519387966837	0.12324319956734896	-2.099387185564562	0.035782783389319596	0.8842741452865222
ENSMOCG00000000200	92.39738402053088	0.13012723640682844	0.35860241785948105	0.3628732822928679	0.7166995459807561	0.9905110955795501
Tnrc18	1174.1312637461328	-0.21743766464888223	0.40212140285057535	-0.5407264152256032	0.5886961686247325	0.9852153260815123
Sdha	3297.7858334209723	-0.12464762648214439	0.1418240386654274	-0.8788892747314626	0.3794613145086988	0.9827898691553396
Bloc1s3	218.17535845468487	0.2119657936818233	0.16329296464228654	1.2980705821966099	0.1942630820084176	0.9672440546260765
ENSMOCG00000000209	4896.065020782136	-0.11430516063088489	0.10542139264959582	-1.0842691199386572	0.27824549280399213	0.9790994683758689
Ankrd49	160.2850956202665	-0.16056236596385778	0.24716975938738842	-0.6496036018395311	0.515948305893301	0.9827898691553396
Smim18	129.12304328527782	0.03035835027084489	0.20437440580268001	0.14854281851786938	0.881914396458211	0.9950953535300727
Abhd14a	538.9897101525014	0.25359970978280205	0.17860513068540593	1.419890396259059	0.15563959228265134	0.957385388462856
Tbck	476.89229716202783	0.20885808580120935	0.24934375575652717	0.8376311055695727	0.4022379174212494	0.9827898691553396
ENSMOCG00000000215	247.71682978954334	-0.1658360859772204	0.1615748755544727	-1.0263729766656147	0.3047158107558369	0.9790994683758689
Hr	213.2458022472488	0.36637859861889466	0.23416142564109904	1.5646411342765134	0.11766707818881617	0.9446087516488444
ENSMOCG00000000217	711.2792881226832	0.03432297260443363	0.1873941313635476	0.18315927160945353	0.8546730502617601	0.9937217263181438
ENSMOCG00000000218	77.06195795269166	0.3487422335067564	0.31754227987065	1.0982544864539476	0.272093379957047	0.9790994683758689
Adap1	1918.913265871598	-0.07516533432579656	0.1414560555555353	-0.531368798816017	0.5951632385153779	0.9858063125051496
Plxdc2	125.98637358128427	0.5458281603602392	0.22698198856160562	2.404720144621056	0.016184854742863065	0.8796473849899012
Eif3k	1160.9869432365304	-0.2732063734648904	0.12513814559479486	-2.183238149856797	0.029018276671912573	0.8841458178596813
Cwc25	488.4801926530878	-0.06885739432845117	0.21438806179229605	-0.3211811038021406	0.7480731511490011	0.9923968896676919
Aplf	80.46459071411132	-0.5075688122279919	0.2625132179633999	-1.9334981155073043	0.0531748650051867	0.8896038645099562
Pot1b	285.72572265673676	0.07069615366302785	0.1729836894825998	0.4086868182455959	0.6827695086112131	0.9905110955795501
Diras1	1519.2691498183624	-0.05467509476855213	0.17568562605687324	-0.31120983540709596	0.7556411064721626	0.9923968896676919
ENSMOCG00000000233	534.5356482814615	0.1581498103398318	0.2925061683129033	0.540671710453141	0.5887338807573415	0.9852153260815123
Tmco1	387.70441304937447	0.18373557091286882	0.17712010580766488	1.037350164596151	0.2995726947795729	0.9790994683758689
Ipo11	997.483944240599	0.012571611573722141	0.15649812295848353	0.08033074989057339	0.9359742023568699	0.9969498598140254
Polr2f	281.27213465734025	-0.1176048725003037	0.2041766257865819	-0.5759957686010132	0.5646180416872132	0.9852153260815123
Brca2	299.9629982815265	0.17836763736135677	0.19633223117328472	0.9084990085195322	0.36361463735694444	0.9827898691553396
Immp1l	111.59760799769718	-0.3039674922003956	0.29342471354250604	-1.0359300978114863	0.300234754956665	0.9790994683758689
Prpf3	510.3889980726517	0.08294155339043988	0.16317546755922127	0.5082967104741888	0.6112452766385432	0.9867514538040189
Tapbpl	94.5299273834429	0.2291991818158803	0.3847339235086654	0.5957342667515463	0.5513527626120913	0.9848857854361492
Ocel1	255.56825665290094	0.0626719778547037	0.20789968665798994	0.3014529692764937	0.7630691079668452	0.9932301794244984
Lratd2	150.62968570209063	-0.11328683985577391	0.26860841728543483	-0.42175461588528873	0.6732041351632865	0.9905110955795501
ENSMOCG00000000248	198.89261808455447	-0.016141561277812258	0.2556019044880978	-0.06315117764924126	0.9496461217217347	0.9969498598140254
ENSMOCG00000000250	547.2045874745579	-0.040162895055972085	0.17429467377644237	-0.23043099473875314	0.8177568787730451	0.9932301794244984
Tmem127	650.2086806025737	0.15231378438901938	0.2014029023254686	0.7562640986319014	0.4494908685572664	0.9827898691553396
ENSMOCG00000000253	1466.987326669069	0.019994573080981723	0.1465975412581724	0.136390916992048	0.8915122537703571	0.9954333909839311
Asb4	237.41516182017736	0.9400451618787752	0.4323616705839517	2.174210217592002	0.029689351382013444	0.8841458178596813
ENSMOCG00000000256	55.61325199828285	-0.10050178578525305	0.3710886609535301	-0.2708295789125135	0.7865221090831159	0.9932301794244984
Ddx1	1953.788818329836	0.013195306420656394	0.17332018907564523	0.07613254111381872	0.939313651195151	0.9969498598140254
ENSMOCG00000000258	98.76336715308658	-0.070628620600617	0.20156650169540313	-0.3503986029749493	0.7260395746854421	0.9905110955795501
Nfatc2	38.13865656327147	-0.42258137121937334	0.3392946525358564	-1.2454701777969084	0.21295897105685369	0.9739863498546697
Trpc1	422.3762053440701	-0.09411229765889857	0.1233873359606079	-0.7627387116044425	0.4456192387808067	0.9827898691553396
Cep89	169.36111430805576	0.2170294057941449	0.2348610114100238	0.924075922568739	0.3554467881825606	0.9827898691553396
Slc1a3	8460.330425508138	0.17667216566299998	0.3057401691646124	0.5778506832966348	0.5633649334480351	0.9852153260815123
ENSMOCG00000000264	64.72675484374562	0.22924205503769027	0.2201995639429008	1.0410649818413549	0.29784539047738445	0.9790994683758689
Ash1l	2392.377892447601	-0.10222192538626806	0.16045969218523642	-0.6370567211874117	0.524087897726898	0.9827898691553396
Glyctk	52.169864167808896	-0.37654206137554547	0.34965003991953114	-1.076911249494504	0.28151991688658407	0.9790994683758689
Usp38	564.0637613225134	-0.030791417050755887	0.10994082048934971	-0.28007265102900286	0.7794217666716641	0.9932301794244984
Ccnc	434.0545277350864	0.16357091458098474	0.16769338461442823	0.9754166209780896	0.32935364232678077	0.9808680905137676
Armcx6	111.18192771239201	-0.8481033312449162	0.2404014630609481	-3.5278626030237583	4.1892954570803346e-4	0.5080777530347029
Trrap	2561.1428135210303	0.15967991527101155	0.2132022540703084	0.7489597892260247	0.45388144188871393	0.9827898691553396
Zfp882	115.2467331042462	-0.04671902316142327	0.21737514767780414	-0.21492347980216545	0.8298269783999103	0.9932301794244984
Stard8	217.789858970891	-0.08780347920428187	0.35320736741015046	-0.24858903665597373	0.8036786898192844	0.9932301794244984
ENSMOCG00000000275	297.5804374818558	0.21951436266448296	0.2566859421491333	0.855186539732457	0.39244788665695507	0.9827898691553396
Rbks	131.38433974868215	-0.4334090280403999	0.346423746117333	-1.2510950328838173	0.21089980754677007	0.9728716713013718
Arsb	2187.645543730317	0.10298911159606883	0.15861858456409306	0.6492877986466585	0.5161523707765396	0.9827898691553396
Mgll	2636.861378710447	0.005272659551428429	0.15019351704182335	0.03510577324026701	0.9719953978714164	0.9984120689781741
ENSMOCG00000000281	233.65982212610677	0.20112194511419829	0.1770471594749658	1.1359795080058126	0.2559651406369999	0.9790994683758689
ENSMOCG00000000283	543.5539879205535	-0.04348034333663603	0.1669264900527032	-0.260475993492154	0.794496630781764	0.9932301794244984
Adcy3	940.5621941015316	-0.10561888536137964	0.18176434555545284	-0.58107592574671	0.5611892831127827	0.9852153260815123
Zbtb24	123.8354804117745	0.08411720715824225	0.1972740080757055	0.42639782087238576	0.6698179890028841	0.9905110955795501
ENSMOCG00000000287	123.84853675674914	0.3382585519453863	0.268159595801578	1.2614075992107228	0.2071620318234782	0.970731939942315
Atg5	317.84430949697196	-0.07815015496066684	0.15678946154383117	-0.49844010044526893	0.6181738785484894	0.9870832312028577
B2m	317.95175921522014	0.566317384610411	0.3393904402696737	1.668630925963693	0.09519054599955112	0.9274490592602745
Pik3r4	748.1935176881766	0.12177457076570491	0.23216682958882864	0.5245132174194295	0.5999216291246717	0.9858063125051496
Ankrd42	315.4298578729913	0.2170366441769559	0.19572557222559173	1.108882409738474	0.26748091310638156	0.9790994683758689
ENSMOCG00000000295	249.48828259821093	0.09921973374614529	0.23386277256129098	0.42426476287559484	0.6713727343487615	0.9905110955795501
Gtf2f1	582.1747732443631	-0.009460255089343958	0.16066238992442905	-0.058882823128635076	0.9530454394682394	0.9969799977903769
ENSMOCG00000000297	192.4232381764721	-0.09534835141840806	0.1831843452596367	-0.5205049115046697	0.6027117055453145	0.9858063125051496
Ranbp3	742.1404706780935	-0.09484240168765685	0.1362378778134559	-0.6961529584123447	0.48633304404048594	0.9827898691553396
Ago2	322.8125483370609	0.3636335467108071	0.2504636160406788	1.4518417982584262	0.146545598770024	0.9564021971810307
Pla2g12a	496.4218542345209	0.12202950956623149	0.19660623246898812	0.6206797619474242	0.534810347805732	0.9827898691553396
Sv2b	3920.462289832123	0.003927385801926232	0.4887370436505997	0.008035784995118842	0.9935884402217107	0.9991581039407021
Rpp40	66.46382053971008	-0.29441475575229714	0.2295063754153661	-1.2828173301044832	0.1995560811280172	0.9672440546260765
Chkb	319.98245569275775	0.07315982827017622	0.2005332758193396	0.3648263759281821	0.7152410149943709	0.9905110955795501
ENSMOCG00000000309	281.26824316049834	0.22425136245249064	0.3094236095231156	0.7247390165156026	0.4686121543222829	0.9827898691553396
ENSMOCG00000000310	4182.559181610719	-0.004555053181828903	0.17547271025071776	-0.025958755497197155	0.979290235700476	0.9991581039407021
Wdr92	280.38664084584497	-0.11164775529992452	0.1764050827850432	-0.6329055463553274	0.5267953256679603	0.9827898691553396
Rnf144a	154.88895868814436	-0.25187626453172535	0.2641275177444805	-0.9536161422430542	0.3402779817169386	0.9808680905137676
Smim13	2892.858597921608	-0.06294421211496241	0.18552707350620778	-0.33927238178990776	0.734404546255428	0.9909445947637578
Gpr173	130.81707814261554	0.18285891170499569	0.22695135289480922	0.8057185355918537	0.420405159421939	0.9827898691553396
Wfdc3	101.46776895809413	-0.13272984338785446	0.25898368721721376	-0.5125027171172052	0.6082992191703471	0.9866862284469666
Phf10	568.2389862939798	0.13210382398794035	0.21511718600858618	0.6141016737856898	0.5391481422768505	0.9827898691553396
Rtl9	80.39161264970005	0.17518442562883474	0.39718865141738513	0.44106100464774467	0.6591688332239263	0.9905110955795501
Cox7b	1946.260200357238	-0.031943820327009625	0.14057221992088936	-0.22724134501814677	0.8202360798320213	0.9932301794244984
ENSMOCG00000000330	120.51364389297667	-0.041196749750473244	0.20163121697379058	-0.20431731935550576	0.8381055365499359	0.9932301794244984
Pex19	1468.8919930502775	-0.04858721913426753	0.11067197086754413	-0.43902009473038406	0.6606469759886655	0.9905110955795501
Retreg3	541.2980122461969	0.11963244768183337	0.13843056556854588	0.8642054389541278	0.38747504491829904	0.9827898691553396
Hdac3	1011.4496808594743	-0.09738875732334265	0.12087370055065826	-0.8057067573812465	0.42041195229157274	0.9827898691553396
Msl3	425.6071624944041	-0.1561598915175701	0.15084587377976322	-1.0352281279205913	0.3005623856738823	0.9790994683758689
ENSMOCG00000000344	85.97456242737356	0.095314634361153	0.2555304727304123	0.37300691906796996	0.7091432943347951	0.9905110955795501
ENSMOCG00000000346	1810.3392579955914	-0.0722911025207879	0.1028419162863243	-0.702934223041126	0.4820967422930468	0.9827898691553396
ENSMOCG00000000347	209.828078532618	0.08388913060476873	0.19617526403869104	0.4276233857303413	0.6689253371042209	0.9905110955795501
Efna3	402.46893821455023	-0.02091355531249888	0.17225560834073161	-0.12141001105247413	0.9033662878661037	0.9961191772170136
ENSMOCG00000000350	1543.4973490094205	-0.17955167932544105	0.0879556223019393	-2.04138944875025	0.041212132382656794	0.8842741452865222
Prrc2a	5908.3415422056805	-0.0541903099499672	0.15001587570446853	-0.3612305010752474	0.7179271427762737	0.9905110955795501
Pla2g7	678.978052394531	0.010483509539967161	0.19761438498176526	0.05305033609235745	0.9576918017461257	0.9983627149610678
Hapln4	1180.6012810201717	0.2761335898153269	0.1617003962886091	1.7076865372826482	0.08769452149421077	0.9224277161160348
Zc4h2	319.03388744362707	-0.09675555291767206	0.1656397032950608	-0.5841326143003132	0.5591310936795253	0.9852153260815123
Mrgbp	257.31401085668114	0.19615904553555685	0.25092656684431347	0.7817388489488364	0.4343680654799989	0.9827898691553396
Chst11	168.2737530814366	0.315596147124897	0.19824147085196706	1.5919784380562947	0.11138954943796793	0.9402330488920683
ENSMOCG00000000358	465.98401168315655	0.05398647302231176	0.20423232644839745	0.2643385303450103	0.7915190728864042	0.9932301794244984
Vsnl1	10368.831655436894	0.08450908996317454	0.26749320746203337	0.3159298539390737	0.7520557514018603	0.9923968896676919
Ninj1	191.09130946579717	-0.11642145057944031	0.15300962894691733	-0.760876628358008	0.44673075940511814	0.9827898691553396
Dmxl1	1735.385836694318	0.10718982449734316	0.18588522682721423	0.5766452037470371	0.5641791560098224	0.9852153260815123
Impa2	54.196031809905826	0.11496649460106545	0.32244376512176126	0.35654742636332815	0.7214306414527181	0.9905110955795501
Fbxl5	1234.7346369902978	0.05131427530284172	0.14675483518987614	0.34965986119946	0.7265939804420942	0.9905110955795501
ENSMOCG00000000365	50.74654633495718	-0.2696697084966783	0.276872297272783	-0.9739858814079602	0.33006354945064903	0.9808680905137676
Syn2	4245.077326976588	-0.2957300094240434	0.29052868140029797	-1.0179029760458622	0.3087240671873094	0.9790994683758689
Tecpr2	791.9470525824423	0.10334217329633562	0.13457464879047532	0.7679170945282064	0.4425364408135835	0.9827898691553396
ENSMOCG00000000370	149.01322740712888	-0.14251702727467888	0.6546678465962564	-0.21769364115811127	0.8276678184895536	0.9932301794244984
Ero1lb	173.3812550067224	0.23479307879971778	0.20267842323817056	1.158451279857298	0.24667992280523943	0.9790994683758689
Rxrb	661.5612530970715	-0.1160537869162586	0.19276001433260379	-0.6020635935210608	0.5471318072667057	0.9840745304064373
Sv2a	3605.312259118676	0.10983531042478094	0.2720711820027059	0.40370064045845383	0.6864328685824393	0.9905110955795501
ENSMOCG00000000376	729.2900261054976	-0.08014966354897593	0.17734540293316262	-0.451941027076876	0.651311467326386	0.9905110955795501
St3gal1	170.75698857079044	0.30786242235596195	0.3189273483160144	0.9653058101838022	0.33439166249588365	0.9808680905137676
Sncaip	195.00564312843144	0.13053424440521863	0.29819251757140025	0.437751575620817	0.6615663775362024	0.9905110955795501
Cdc25b	201.604980186954	-0.5004981481999091	0.45020953626353805	-1.1117004591989224	0.26626696231858743	0.9790994683758689
Tada2b	578.4979356944544	-0.08765231912860352	0.12921844677436195	-0.6783266732934797	0.49756459017379295	0.9827898691553396
Il6st	711.7816526610743	0.07429551237606266	0.22006241114259525	0.33761109855295063	0.7356562773611586	0.9910073677480985
Timm8a1	256.4984881661856	-0.025926799793298563	0.18697016193236463	-0.13866811434156767	0.8897124156896237	0.9954333909839311
ENSMOCG00000000389	418.1097385096815	-0.02833717235389151	0.14929501968709938	-0.18980654822432858	0.8494607244371147	0.9937217263181438
Eif3b	1967.959614484441	-0.10538062973138548	0.12534805395019516	-0.8407041546353533	0.4005136925059984	0.9827898691553396
ENSMOCG00000000392	102.86773852813239	0.02459134794432327	0.37420668656815576	0.06571595010727942	0.9476039735142059	0.9969498598140254
Mcl1	149.09123814888278	-0.19729629165901846	0.20404569183437488	-0.9669221137938313	0.33358297088597805	0.9808680905137676
Dusp10	114.69232801868684	0.29324201361140656	0.22733521565142376	1.2899102005429666	0.1970818386804619	0.9672440546260765
Cdv3	2162.0939965707844	-0.02025130353977839	0.11945895183264442	-0.1695252070196412	0.8653835469613421	0.9937217263181438
Vip	120.84516292267388	0.03253456414785198	0.7731274666102447	0.04208175954541992	0.966433521063081	0.9983627149610678
ENSMOCG00000000404	664.2761366673034	-0.14921624094541594	0.1385535862065206	-1.076956901880563	0.2814995202294815	0.9790994683758689
Rbm42	700.7766552518856	-0.007999299289142935	0.13131127268788392	-0.06091860299120404	0.9514240339160053	0.9969498598140254
Trappc2	384.8853142851744	-0.04011750903744962	0.22976997435120336	-0.17459857037773793	0.8613950720034282	0.9937217263181438
Atad2b	202.56614287222934	0.2190152454815113	0.20925668163240604	1.0466344193790083	0.2952682209027544	0.9790994683758689
ENSMOCG00000000409	472.50955298847884	-0.17564511674425934	0.17935358391296147	-0.9793231499042594	0.32742033551746624	0.9808680905137676
March4	140.55982248046513	-0.07783964313805651	0.18056570697702068	-0.4310876325367951	0.6664046528351222	0.9905110955795501
Ube3b	992.726492339599	0.1373897466814808	0.11659084650667945	1.178392222013842	0.23864027708996652	0.9790994683758689
ENSMOCG00000000414	331.73408087419693	-0.08456515313263684	0.1813821191169936	-0.46622651419179484	0.6410533726651644	0.9905110955795501
BDNF	84.83892064758544	0.38052968906735535	0.6186676892435802	0.6150792997329689	0.5385023518598551	0.9827898691553396
Crb3	41.26251984283853	0.20162340289748334	0.3002666221433168	0.6714812371028333	0.5019140083803186	0.9827898691553396
Trim45	185.83391194299574	0.11428844826095425	0.3325528894562148	0.34366999020166955	0.7310944823351662	0.990650758600675
Cmpk2	305.5962987355369	-0.19869772832407473	0.18502264172501573	-1.073910341305056	0.2828628679643753	0.9790994683758689
Pfkp	4520.971971555469	-0.07936809179064284	0.21311209391673633	-0.37242415637684195	0.7095770711949689	0.9905110955795501
Rassf2	70.2146320338811	0.31748711981633787	0.34139490917141524	0.9299702815923561	0.3523864717383876	0.9827898691553396
Commd5	212.17366830191176	-0.25170671819109686	0.13878221944995642	-1.8136813144270254	0.06972680345984107	0.9056038784335924
Hist1h2bc	286.86818533431443	0.031474849687769195	0.37518751747704604	0.08389098309939062	0.9331431087334005	0.9969498598140254
Sgcb	820.8026147095832	0.07456337216448551	0.1790519215628909	0.4164343588923483	0.6770921907736476	0.9905110955795501
Ung	128.5032180533502	0.03955276431942264	0.2993639530710299	0.13212266845647236	0.8948872662528448	0.9954333909839311
Adcy7	613.4530628687596	0.46011570815976927	0.20805985120239914	2.211458412090144	0.027004108730752617	0.8838432118634834
Adgrb2	3882.033439375267	0.034132129464610556	0.17162372709599888	0.19887768458447777	0.8423584259428604	0.9935929770312206
Spaca6	75.53088222477581	0.27964160764972656	0.3079055539689449	0.9082057924746981	0.36376950429695165	0.9827898691553396
Zfp954	123.95841098482283	-0.0491270211649625	0.19717056903378855	-0.24916001107925873	0.8032370106372181	0.9932301794244984
Trhde	237.6357618384025	0.4384648497467259	0.2746475398691309	1.596463780289653	0.11038528610981865	0.9402330488920683
Bsdc1	1350.0318689040969	-0.16306566887568202	0.09727993140492808	-1.6762518899907584	0.09368886411095685	0.9274490592602745
Iqsec1	2602.6733349481833	-0.03860685278766893	0.21540844035261397	-0.17922627694843915	0.8577600317512866	0.9937217263181438
Epc1	540.6832598193611	0.011906262311507727	0.1411957193625377	0.08432452743795232	0.9327984117735661	0.9969498598140254
Rab23	832.2598295341675	-0.033182608926820685	0.14373476277307598	-0.23086001108311124	0.8174235581085667	0.9932301794244984
Pir	133.05404624174324	0.4212222213709986	0.3198168297045652	1.317073344014159	0.18781404103204866	0.9672440546260765
Eed	226.3862457033194	-0.16022586043936893	0.18813357076409967	-0.8516601252430159	0.3944027581205394	0.9827898691553396
Sass6	58.01886203912446	0.543167856877743	0.3218628538645419	1.6875754699743601	0.09149275132873347	0.9261742870988364
Rab12	2406.3781725376834	-0.5943597536607189	0.27405139669969486	-2.1687893614788525	0.030098679289631093	0.8841458178596813
Lhfpl5	51.53108729517576	0.01013695016875421	0.30366607124728634	0.033381899160210504	0.9733700439954874	0.9986064803838273
Sf3b1	4802.421155869449	0.09908164611650663	0.1659744206283253	0.596969374807369	0.5505278276089562	0.9848857854361492
Nipbl	1100.1319101215201	0.007771053771006823	0.14992583546701235	0.05183265276995345	0.9586620373639875	0.9983627149610678
Tspo	67.31454266745924	0.1231967037806107	0.3729544523553121	0.33032640581869693	0.7411533427272268	0.9914566743662293
Hpca	12182.275072190012	-0.6619720849656943	0.26523859677821765	-2.495760771646707	0.01256873343437145	0.8666807996061601
Kcnn3	325.82241327321304	0.6271825138031559	0.3171791359000572	1.977376324023975	0.04799910814865523	0.8896038645099562
Twsg1	459.38141123413084	0.12355898434228314	0.193139422239412	0.6397398465297351	0.522341745616805	0.9827898691553396
Zswim9	217.1729060829616	-0.05732960772354438	0.19887499998313127	-0.2882695548882822	0.7731404101057451	0.9932301794244984
Gfm1	689.8498445630937	-0.1377053032884651	0.15983575928708485	-0.8615425227913441	0.3889393117229342	0.9827898691553396
Lzts1	957.4117169275167	-0.33304569625923003	0.2637184440650601	-1.2628835932956841	0.2066310169953373	0.970731939942315
Cenpc1	199.32153192751232	-0.09107248977023612	0.24730114609315684	-0.3682655386317121	0.7126752458552873	0.9905110955795501
Cadps	2511.448399539292	0.18256153125876062	0.24578231693196906	0.7427773223786985	0.4576165073599037	0.9827898691553396
ENSMOCG00000000471	6365.247167009042	-0.1449777173585972	0.2261696395806815	-0.6410131688204742	0.521514127106049	0.9827898691553396
Isy1	359.402718413335	0.04890311486731527	0.20540635394086515	0.23807985453747985	0.811819159301874	0.9932301794244984
Btbd2	1893.594956839837	-0.08722148194976136	0.1909189006840963	-0.4568509541864703	0.6477781785972903	0.9905110955795501
Galnt18	223.20646684415243	-0.4333212341743131	0.2242635228413336	-1.932196679532622	0.053335234875865244	0.8896038645099562
Ssr4	176.5766282225992	0.0016104844024873671	0.1924184720184916	0.008369697491063114	0.9933220255607764	0.9991581039407021
Jagn1	318.5786664758343	0.17005809493845062	0.1959680205079048	0.8677849298967173	0.3855120814997642	0.9827898691553396
Ryr1	971.1078081320965	-0.10558815178901036	0.48705095474955684	-0.2167907705741058	0.828371404937959	0.9932301794244984
Blzf1	379.21280981648783	-0.040476384395605615	0.15973718188604194	-0.25339363019739425	0.7999640494461918	0.9932301794244984
Utp15	536.4767786886508	-0.08116014540064065	0.13478092540761602	-0.6021634378543491	0.5470653505665433	0.9840745304064373
Gpi1	7244.349133530267	-0.002456251833827824	0.18763389710600412	-0.013090661504728861	0.9895554616009816	0.9991581039407021
Cacng8	429.0804195252767	0.07527905711674407	0.2114386458500665	0.35603262976875705	0.7218161291220462	0.9905110955795501
Necab3	504.9665861600824	0.020993531470420653	0.31442093738027593	0.06676887247184198	0.9467657042601815	0.9969498598140254
Kif3c	1717.7887925629266	-0.05038849948424746	0.19157131825543364	-0.26302736726518433	0.7925294855472101	0.9932301794244984
Sept6	702.9007560778792	-0.012323105282472803	0.2236059031752415	-0.05511082269064739	0.9560501739895306	0.9980182914567937
Atrn	1198.1616330093104	0.05164628544699379	0.25462077832838664	0.20283609918270348	0.8392631413126674	0.9932301794244984
Napb	5418.080868113826	-0.011057163781239549	0.24732830645624573	-0.04470642256710574	0.9643413143502982	0.9983627149610678
Cdpf1	74.96278721402756	0.34244389575562584	0.2881892709149149	1.1882603910564355	0.2347308375387412	0.9790994683758689
Mocs2	672.8889637422318	0.008380481478608965	0.20348768863582808	0.0411842187347614	0.9671490346239188	0.9983627149610678
ENSMOCG00000000507	55.78145772743956	-0.17290133521840478	0.25821337341920747	-0.6696064302513904	0.5031087138568615	0.9827898691553396
Mapre1	1027.801265704902	-0.07662937656612256	0.17789880069462202	-0.4307470104740235	0.6666523327673457	0.9905110955795501
Zfp398	289.8703743881958	0.37461367251923683	0.15025738560284194	2.4931464833909067	0.01266165984036958	0.8666807996061601
Sik1	456.59264403705725	-0.2719596492323349	0.36293195594789446	-0.7493405989065887	0.4536519436483267	0.9827898691553396
2410002F23Rik	684.561764769207	-0.24685916209530864	0.15505225491409289	-1.5921030121882562	0.11136156040400536	0.9402330488920683
Fam8a1	383.0199205636705	-0.012255049212986719	0.18652782772253856	-0.06570091638667551	0.9476159428205283	0.9969498598140254
ENSMOCG00000000514	73.81044091387348	0.028477190585961504	0.3486739947599629	0.08167282623289991	0.9349068876739893	0.9969498598140254
Sike1	543.0520802941206	0.053683200686658473	0.1524310606207592	0.35218019521768973	0.724703128629875	0.9905110955795501
Ccdc65	506.63641439097137	-0.08920290719430979	0.19526752727153632	-0.456824073314891	0.6477975011573892	0.9905110955795501
Tmem246	707.303683765258	0.2247837943997127	0.23710908724019664	0.9480184712279789	0.3431200508866309	0.9827898691553396
Pycr2	203.11770495801852	-0.06237160340993138	0.22398368337523386	-0.27846494204420197	0.7806554733439999	0.9932301794244984
Cars2	201.57103756419613	0.10328609808523796	0.15918266260297914	0.6488526853131362	0.5164335997211942	0.9827898691553396
Akr1e1	87.3386846082671	0.5027877544040005	0.4651913015369281	1.0808193376420816	0.27977748481347675	0.9790994683758689
Crocc	1171.1312920443886	0.012144153179084571	0.38261165307374995	0.03174015501494341	0.9746792719356986	0.9986064803838273
Wdr77	966.9102572038718	-0.1224293136332607	0.12772458585711777	-0.9585414805746112	0.33778978513763624	0.9808680905137676
ENSMOCG00000000534	31.678804831624248	-0.2603010308611712	0.4252685542750026	-0.6120862411398654	0.54048070017423	0.98348836184742106
Magohb	191.52247580961452	-0.07869454473089625	0.22418453058420545	-0.35102575778009787	0.7255690245436808	0.9905110955795501
Snx30	381.1320544559471	0.14974604828877375	0.18048695308428442	0.8296779669101335	0.4067208819432887	0.9827898691553396
Ago1	1723.5517507058444	-0.010723310046837475	0.12389014144360493	-0.08655499075137266	0.931025243745439	0.9969498598140254
Cdk20	74.59692603269254	0.4744999797144553	0.22092273801500703	2.147809609720766	0.0317288833077771	0.8841458178596813
Lgi4	438.32875235066706	0.4605353565794254	0.3079781683857495	1.4953506574615207	0.1348229508432156	0.9564021971810307
Kcnh3	1167.912210653232	-0.10816534578739705	0.2702108523964805	-0.4002997837728811	0.688935727196551	0.9905110955795501
Plekhm1	358.0037057743805	0.13065158593363063	0.17498276335888832	0.7466540328070213	0.4552724235773345	0.9827898691553396
Mmaa	334.43192839715834	-0.20459227327616444	0.16376118373452606	-1.2493331362811217	0.2115432529722344	0.9728716713013718
Zmym4	692.3051856799606	-0.05978396983178078	0.16796456406050397	-0.35593203939281787	0.721891461009867	0.9905110955795501
Snrnp35	274.3397166237625	-0.10389390253147529	0.17600945192396114	-0.5902745642112396	0.5550065893224365	0.9852153260815123
Upf3a	649.3499856822694	0.1342137333929524	0.22544457898402412	0.5953291669189495	0.5516234631454827	0.9848857854361492
Ppwd1	338.8148237954025	-0.06147858651410857	0.19479572226380665	-0.31560542397768754	0.7523020202258841	0.9923968896676919
Rmdn1	925.9337491013783	0.244330820186478	0.2586746056609213	0.9445489230077513	0.3448892139103344	0.9827898691553396
Bbs7	399.5946283243896	-0.28263449796566054	0.33558038738170987	-0.8422259124582707	0.39966151203404143	0.9827898691553396
Dpp6	1478.6675031666387	-0.11987092682853896	0.22320294220005865	-0.537049044457029	0.591233736991579	0.9852153260815123
Rcn3	26.687248832440503	0.0804495098148918	0.4323180686658688	0.18608870562167004	0.852375198826238	0.9937217263181438
D8Ertd738e	210.62555361447806	-0.3575553304452709	0.24251528901554698	-1.474362016088598	0.14038414574048086	0.9564021971810307
Isca2	391.872047648849	0.2708530952747748	0.1775831784588324	1.5252181970465428	0.1272046832862614	0.9511334148555968
Slc9a5	598.2468530454971	0.07522459563000564	0.30013068991257585	0.2506394652673393	0.8020928665330576	0.9932301794244984
Ust	235.78439780274923	-0.026342376603531434	0.31964523269048767	-0.08241129198707225	0.9343196568883372	0.9969498598140254
Fam219a	2360.4226483869897	0.023424920584983727	0.1199940572870268	0.1952173392133172	0.8452228054691154	0.9937217263181438
Por	900.3227795935181	0.12645445744159736	0.24318812658293804	0.5199861490707719	0.6030732290189598	0.9858063125051496
Hectd4	4018.2403765016966	0.02016996244739974	0.18139546521174096	0.11119331138656394	0.911463055483352	0.9967185265324758
Actn2	726.2805106871414	-0.31692967521641136	0.30605765395028167	-1.0355227883563918	0.30042482967397727	0.9790994683758689
Neto2	855.9087347167946	-0.15452418649376318	0.1981600945597456	-0.7797946747909624	0.43551174133246207	0.9827898691553396
Plppr4	2334.686572927133	-0.1636300730770222	0.2303331790446813	-0.7104060029722437	0.47745240167695835	0.9827898691553396
Ssr3	1084.708382576468	0.0631038334108356	0.2032078351566403	0.31053838727327016	0.7561515724790657	0.9923968896676919
Rem2	236.21937513202087	-0.5289327955519293	0.3014525454253542	-1.7546137976894405	0.07932538975759013	0.9066875931076556
Mras	6453.041768230898	-0.0459284219644366	0.11278561038532117	-0.40721880927475207	0.683847288066346	0.9905110955795501
Gcsh	554.8121364169089	0.1299800841693955	0.23549010703700624	0.5519556035913207	0.5809787710556211	0.9852153260815123
Ufd1	536.7428932753069	-0.08658037709128481	0.14649362952988365	-0.5910180351809976	0.5545083368972741	0.9852153260815123
Pde5a	49.040671265637094	0.46828823310517936	0.34615897897126874	1.3528126137211867	0.17611550202653842	0.9635979972442444
Adprh	61.70989395757459	0.33684637928623973	0.3197153760385698	1.0535820436912715	0.2920743137485382	0.9790994683758689
Frmpd4	955.0012910573224	-0.12848014791299764	0.325075286722009	-0.3952319759787478	0.6926716962437065	0.9905110955795501
ENSMOCG00000000589	413.5841813011165	-0.20156756374474438	0.35577451628270557	-0.5665598701413869	0.5710132459487085	0.9852153260815123
Ldb2	557.3961221360843	-0.6919026235194863	0.1856459065870903	-3.7270017757967673	1.9377109382279705e-4	0.4062687276562977
Aven	82.62258469760224	0.291599898194042	0.21871803626227734	1.3332229164876361	0.18245866106813102	0.9662432145671542
Cecr2	80.28014171470122	0.6693671006194868	0.3000406053723307	2.2309217107092763	0.025686315344338743	0.8838432118634834
Dctn2	2508.906622147522	-0.17623769755668767	0.08406418213068406	-2.0964659750417005	0.036040875169947965	0.8842741452865222
Slc35a5	356.6007770904446	0.1892759308300362	0.18125243422813894	1.0442669729433716	0.2963618887130279	0.9790994683758689
Ccdc97	227.79410946498209	0.01723120794252504	0.13460496728330387	0.1280131654150505	0.8981385542699506	0.9959426155422841
Chst15	559.3751599772756	-0.40399780437753896	0.2733951051568768	-1.4777067941495186	0.1394862750729773	0.9564021971810307
Slc4a7	269.80571501883986	0.3145725469429032	0.18953950845409775	1.6596674197827503	0.09698137707699706	0.9315521134395639
ENSMOCG00000000600	186.66129966023442	0.4039590545842552	0.16918941965229056	2.3876141629568277	0.016958134913414642	0.8796473849899012
Strn4	1765.115350839021	-0.07005715315210756	0.1253812055308784	-0.5587532266536882	0.5763301480214378	0.9852153260815123
Klhl5	951.310315269662	0.09854643406831759	0.1865646010286924	0.5282161434963849	0.5973493259239407	0.9858063125051496
Mesp1	122.89713869515485	-0.25145607670763936	0.2313862723622525	-1.086737230089286	0.2771529554292263	0.9790994683758689
Cdh7	175.38510387388095	0.11123814024788727	0.2173178532348354	0.5118683927347766	0.6087431203997795	0.9867397952499977
ENSMOCG00000000610	125.3349024472736	-0.19759898316614596	0.24917545134187166	-0.7930114387353424	0.4277711583470445	0.9827898691553396
Phkg2	374.6572085384799	0.13169703066026453	0.1770702708415791	0.7437557419115881	0.4570242598675743	0.9827898691553396
Rbm18	1119.601640498246	-0.028548073769433482	0.12558077020475722	-0.22732838573044548	0.8201684022215301	0.9932301794244984
Ice2	131.70759689798533	-0.011127439188657226	0.2202151573708669	-0.0505298514484967	0.9597001617659143	0.9983627149610678
Secisbp2	684.2921047786274	-0.19926157595893074	0.11812625963228236	-1.6868524964662062	0.09163171822590407	0.9261742870988364
Ldlrad3	29.53930331936147	0.70656758280302	0.37505677349318733	1.8838950066738478	0.05957917879769482	0.8906097992566931
Caml	277.5761876417707	-0.038308149479466425	0.12911625820784114	-0.2966950096850003	0.7666993672804145	0.9932301794244984
Fbxl6	122.04721715867704	0.12086082286960095	0.2724888267819067	0.44354414196342423	0.6573721982347361	0.9905110955795501
Rasl11a	60.54031747430901	0.26084236271614764	0.33044981997998196	0.7893554389950915	0.42990429265590624	0.9827898691553396
Eci1	169.53732564036076	0.21460768203207245	0.22492059241207116	0.9541486607811138	0.3400083975798626	0.9808680905137676
U2surp	1430.429226321831	0.22236704137574143	0.1901229883577357	1.1695957616515855	0.24216368377369493	0.9790994683758689
Ube3a	2833.253043145483	0.20259165416316405	0.18008294097601807	1.1249908129284911	0.2605929273455275	0.9790994683758689
Nalcn	2218.932238738736	0.16879935765386944	0.21468146788535541	0.7862781977250686	0.4317045224715304	0.9827898691553396
Rock1	968.8489610054877	0.4310984781498476	0.33487885777761006	1.2873266500333564	0.19798045845869439	0.9672440546260765
Ppp2r5e	1472.5657520574512	0.02246560165465461	0.10541298741420604	0.21311986507297315	0.8312334704743329	0.9932301794244984
Npepl1	224.57807660340552	0.01385829630565295	0.21360148056455877	0.06487921464319826	0.9482701700323065	0.9969498598140254
Wdr24	251.24935168608434	-0.038973829724194164	0.16276994927993316	-0.2394411861440507	0.810763496703936	0.9932301794244984
Kcna2	2983.7254791557875	0.29098573071975753	0.24148309204257576	1.2049942224048298	0.2282055323101376	0.9790994683758689
ENSMOCG00000000649	1066.5022039316514	-0.01269872724342474	0.17918503255116017	-0.07086935254929316	0.9435017351479713	0.9969498598140254
Invs	159.56347593152367	0.34899790887023935	0.3933075837475017	0.887340908977467	0.3748953869432366	0.9827898691553396
Khnyn	142.67255801746487	0.07262849857948059	0.21197549258137954	0.342626865469355	0.7318791884121081	0.990650758600675
Kdelr1	562.3723854036193	0.04485925554968422	0.15322328500929042	0.2927704855496621	0.7696975893501908	0.9932301794244984
Tmem198b	53.644388295032655	0.13244172070771454	0.2920664170843851	0.4534643935781528	0.6502143771421662	0.9905110955795501
Rsrp1	872.5514673655873	-0.30995263286732144	0.2062421784384019	-1.502857636658908	0.13287575929686926	0.9564021971810307
Kcnh5	155.75903595313613	0.9751365461721825	0.4664423111131449	2.090583386067744	0.03656542633676816	0.8842741452865222
Ranbp1	1096.5003671445338	-0.05737966205835704	0.14172205523735365	-0.4048746115222403	0.6855696812751404	0.9905110955795501
Rpusd4	186.7750673882247	-0.05653809095894096	0.17699665374768497	-0.3194302816568387	0.7494002511872312	0.9923968896676919
Cmbl	46.360836122030356	0.31251069265396614	0.37491074084175574	0.8335602547750753	0.4045288303263504	0.9827898691553396
Syndig1	700.3898735979202	-0.37647625631311965	0.20853193017185614	-1.8053650393148741	0.07101757817080447	0.9056038784335924
Mertk	231.91514413829861	0.19318835547096577	0.3328214517541455	0.5804564412923527	0.5616068528492089	0.9852153260815123
ENSMOCG00000000667	318.23008090421183	-0.0583454529401496	0.15220013271648755	-0.3833469255170311	0.7014625502373033	0.9905110955795501
Wdr34	274.14021979141796	-0.06778221360239518	0.16911303241376952	-0.40081011282768664	0.6885599327804747	0.9905110955795501
Nelfa	267.1477132109469	-0.10172233235293576	0.13840704683527594	-0.7349505294625627	0.4623696232253784	0.9827898691553396
ENSMOCG00000000670	271.1166679942517	0.1165062173509944	0.315489286286705	0.36928739711661035	0.7119135183702605	0.9905110955795501
Ssna1	276.0978662259115	-0.08772307748976411	0.16287173506606983	-0.5386022163647901	0.5901613579286984	0.9852153260815123
ENSMOCG00000000673	731.1852075754158	-0.08805651899081746	0.1636365686439675	-0.5381224974376391	0.5904924816185202	0.9852153260815123
Plec	3046.1908748909223	0.17692492178677963	0.22380611705727663	0.7905276411256483	0.4292196861501298	0.9827898691553396
Esyt2	531.8854106913408	0.06721935995781722	0.1783743371884304	0.37684434329142474	0.7062892847655904	0.9905110955795501
Tmem14c	413.7079113833641	-0.22092352537218804	0.17590481484356926	-1.2559265394108374	0.2091426053436116	0.9728716713013718
Scaf11	1029.1716887422035	0.08410721650174846	0.12222041350225328	0.6881601370150645	0.49135194376330793	0.9827898691553396
ENSMOCG00000000679	4486.407502522439	0.06348682490679038	0.2100739975056695	0.30221172377641353	0.7624906675670511	0.9932301794244984
Snrnp40	365.2540165782452	-0.07981974605366111	0.1061605611091615	-0.7518775825947739	0.4521246804448974	0.9827898691553396
Crnkl1	478.68404827525836	-0.09285772910250238	0.1298008738071343	-0.7153860091918627	0.4743705552045445	0.9827898691553396
Zfp612	539.5274565454594	0.28986684771499865	0.2562086132951108	1.1313704250103374	0.2578992140506762	0.9790994683758689
Vezt	862.7910441822573	0.042683317796076745	0.13365447543103098	0.3193556942887587	0.7494568039394955	0.9923968896676919
ENSMOCG00000000686	102.15463780920084	-0.11507023410584119	0.19987520634085523	-0.5757103955635562	0.5648109475836511	0.9852153260815123
Tmem43	190.91618082026474	0.19976626317834661	0.20848303175356497	0.9581895538361035	0.3379671837839857	0.9808680905137676
ENSMOCG00000000688	427.7959117718808	-0.06896273549347694	0.13201430212111812	-0.5223883653924576	0.6013999550423448	0.9858063125051496
Cers4	228.07828412226434	0.03799127717002809	0.21903355278350997	0.1734495774151013	0.862298058462599	0.9937217263181438
Nts	146.67545773203318	0.3732682543765071	0.46181740545857447	0.8082593898899502	0.4189412752090432	0.9827898691553396
Kcnk3	130.26723801854328	0.1441173672592762	0.3313267487793097	0.43497051714128276	0.663583827880418	0.9905110955795501
Adal	312.8431243731437	0.14338751489910248	0.20379585420831056	0.70358406188449	0.4816918397812183	0.9827898691553396
Wdr70	342.22322068696735	-0.17203532054717066	0.1787365653038119	-0.9625077009550305	0.3357946367090311	0.9808680905137676
Dgkz	4042.88979693413	-0.04743816842594303	0.1831799478725621	-0.258970312945747	0.7956581461301306	0.9932301794244984
Uhrf2	1133.6387830557762	-0.1398668121606978	0.09297468835876639	-1.504353653985763	0.13249033086053882	0.9564021971810307
Nipsnap1	1875.5392260244307	-0.15692279981904358	0.09872589412578049	-1.5894796518035892	0.11195214442877584	0.9402330488920683
ENSMOCG00000000698	2397.9277206394972	-0.03363730543894767	0.13903905405238787	-0.24192703027362103	0.8088367050259915	0.9932301794244984
Prkci	989.4348897345336	-0.06809703484866363	0.2604835450983203	-0.26142547631160423	0.7937644126929665	0.9932301794244984
ENSMOCG00000000700	3325.9618871090784	0.013265181286083361	0.20075416944049115	0.06607674113595689	0.9473167282584343	0.9969498598140254
Smarcc1	855.7733536840773	0.11990645733349778	0.18702184466167784	0.6411361065890904	0.5214342572442536	0.9827898691553396
Tbc1d1	187.900828626049	0.1275380366140659	0.2714245419316932	0.46988395266837063	0.6384379299175837	0.9905110955795501
Slc20a1	1347.4982314960855	0.3249143122255421	0.18352935349699617	1.7703670068824167	0.07666602223553445	0.9066875931076556
Hcn3	140.46169265234533	0.47746256307931967	0.2913312321632469	1.6388993364493596	0.10123422595226428	0.9347323746186648
Dscaml1	604.8245534194366	0.24397876083178754	0.18416449939914345	1.324787142081099	0.1852417606272415	0.9672440546260765
ENSMOCG00000000709	1472.5547937868334	0.14378733662332047	0.1613750274273239	0.8910135534327073	0.3729218991751075	0.9827898691553396
Slc25a37	614.4802293749605	0.05091340764706351	0.3684663074326674	0.13817656219861377	0.8901008780532541	0.9954333909839311
Cdh9	207.68693798146361	0.15337570074489373	0.253123525806797	0.6059322232338122	0.5445597607821011	0.9835123935726917
Hspa5	2325.70149533742	0.014537913592248585	0.27394391197504114	0.05306894205983714	0.9576769772145688	0.9983627149610678
Gm20503	85.62415778789695	-0.02916696877055606	0.2717173164678229	-0.10734306208272174	0.9145168232732936	0.9967783847173113
Kif17	146.2511548380994	-0.42724156562166016	0.22018334081259558	-1.940390058779687	0.052332303837910446	0.8896038645099562
ENSMOCG00000000716	1047.452545675241	0.0626685301028962	0.16004099961484425	0.3915779722303329	0.6953700663438112	0.9905110955795501
Acap2	926.93391518396	0.28922881742872386	0.22823237634840204	1.267255864642137	0.20506381627229142	0.970731939942315
2210408I21Rik	203.75685507217293	0.08951523595297864	0.2429227395595885	0.36849261668655237	0.7125059494789068	0.9905110955795501
Hspa12a	838.8107284202974	0.052067952708957255	0.3100369179704204	0.16794113762260046	0.8666295865690575	0.9937217263181438
Trp53inp2	1195.6925874652982	0.17474327507878404	0.19878982826289235	0.8790352937359168	0.3793821397076726	0.9827898691553396
Txnrd2	173.764798200757	-0.19876555969688708	0.2017281865332985	-0.9853137685549839	0.32446997165883773	0.9808680905137676
Sulf2	566.8629354823316	0.29907279083309	0.22432106109084868	1.33323545002298	0.18245454924506194	0.9662432145671542
Epb41l3	3897.1549267798728	0.24263152920922285	0.15568887253892744	1.5584384757398564	0.11912934182128726	0.9446087516488444
Rnf128	173.8223785869796	0.47227946711152063	0.23641710065851793	1.997653578341118	0.04575423025608966	0.8854355124960115
Zc3h3	420.5698011815836	0.18342508968701174	0.1434179343039254	1.278955038484272	0.2009128893261808	0.9680367321633409
Spsb3	512.0695165902315	-0.08046880362210253	0.1458936857685915	-0.5515578223840181	0.5812513403931376	0.9852153260815123
Aprt	183.82214392350645	0.007169331626482373	0.20490854593736996	0.03498795813364305	0.9720893430126462	0.9984120689781741
C030006K11Rik	147.27679439442292	-0.017287430936154487	0.24594547869848934	-0.07028968789195583	0.9439630900772409	0.9969498598140254
Wdr75	381.221752484015	0.006622363689536202	0.17092481782653873	0.038744307431451165	0.9690942476889675	0.9983627149610678
Zfp579	127.56044959262306	0.17756398329242506	0.22035887306888258	0.8057945696469407	0.42036130970913005	0.9827898691553396
Taf4b	232.26276991067826	0.01911341223989649	0.21513564357947404	0.08884354039099865	0.9292062542547607	0.9969498598140254
Hras	1457.030908549343	-0.07478335723769132	0.12626896591586245	-0.5922544521947076	0.5536802112801512	0.9852153260815123
ENSMOCG00000000745	454.7319822440863	-0.3293035140660588	0.1882211102263178	-1.7495567509409702	0.08019482807761308	0.9066875931076556
Gcn1	1125.018166422048	0.13260187555080646	0.178773023180804	0.7417331384316197	0.4582490376828469	0.9827898691553396
Adhfe1	410.64153460592337	0.18503473158626085	0.29783966583039356	0.6212561750980137	0.5344310837388759	0.9827898691553396
Brpf3	1169.74262809399	-0.24217276873506613	0.13148289559719298	-1.841857586381268	0.06549598402468593	0.8985693373884512
Tmem184c	775.2029262842298	-0.102014720107401	0.16383830077621367	-0.6226548958582196	0.5335113284829438	0.9827898691553396
Wdr13	3553.8804798320025	-0.04655262784731575	0.112282633025489	-0.41460221044823514	0.678433129754583	0.9905110955795501
Prdm4	537.4226408621776	-0.06335056578102442	0.14219263436985366	-0.44552635276624014	0.6559394198124832	0.9905110955795501
Rps27l	81.1019638892218	-0.3057322583051548	0.25588173700354566	-1.194818598174978	0.23215791230081104	0.9790994683758689
Mbnl2	4958.865410338756	-0.04618334868151337	0.190078255872018	-0.2429701833575808	0.8080284956463515	0.9932301794244984
Clock	1536.974632206897	0.36956106891012463	0.1530372320680211	2.414844178218437	0.01574194253059347	0.8796473849899012
Slc45a4	220.87959243613554	-0.06272729958630391	0.23375930313380028	-0.26834140393719325	0.7884365387221696	0.9932301794244984
Stkld1	62.80313712103587	0.1747539635087402	0.2973086105848752	0.5877864188492843	0.5566756610453114	0.9852153260815123
Jakmip1	1930.353082514571	-0.25697600651633223	0.15484960882199006	-1.659519894633659	0.09701107513804166	0.9315521134395639
Rnf145	1008.9329707370396	0.020415235856006964	0.180329339479681	0.11321083920626956	0.9098634024728287	0.9967185265324758
Cyp4f17	116.40126451654703	-0.02277979887872957	0.3427689242943723	-0.06645818002791327	0.9470130515693577	0.9969498598140254
Dscam	481.6292423345691	0.24169538445775812	0.2879451620258627	0.8393799109430757	0.40125615332079156	0.9827898691553396
Yipf4	596.5168598650382	0.06698498344669686	0.21068639457499105	0.31793692033044135	0.7505327861476637	0.9923968896676919
Dalrd3	126.0859428048512	-0.20041460709941428	0.20772468441034567	-0.9648088173455069	0.3346405787356386	0.9808680905137676
Ctsz	98.5591222270241	0.6016953933603002	0.2849054952974804	2.111912207000598	0.03469398017060507	0.8842741452865222
Meis2	4394.229906128532	-0.48112008527610173	0.19521756635465326	-2.464532748052228	0.013719202613763542	0.8703434731000946
Idi1	585.4320710829106	0.26777370780777454	0.2441956279781032	1.0965540621054262	0.2728363782275822	0.9790994683758689
Mrps25	640.6432323044892	-0.15803931288494055	0.13533224793303764	-1.1677875399153819	0.24289247534814692	0.9790994683758689
Ubl4a	286.9443410794632	-0.04347335806097251	0.13616692864330757	-0.31926517322610676	0.7495254395587166	0.9923968896676919
Susd1	58.62911006104623	-0.07896417025423495	0.3989611201014485	-0.1979244750319425	0.8431041546595153	0.9937217263181438
Tefm	95.87855878336028	0.1958456536709355	0.2179622390376679	0.8985301974122673	0.36890295356379676	0.9827898691553396
Bod1l	2270.7781453554335	0.05760601662199317	0.16645635311929508	0.3460728025244455	0.7292880024300703	0.990650758600675
Slc35c2	231.63251303347292	7.2559332877048e-5	0.21480910028635167	3.377851905730374e-4	0.9997304864166991	0.9998258828401971
Zkscan4	104.52717900926835	-0.09043378140543534	0.2309236539536322	-0.39161766175583634	0.6953407360314205	0.9905110955795501
ENSMOCG00000000801	110.70838595651686	0.3312453198692295	0.33858180045450803	0.978331733792454	0.32791027966608866	0.9808680905137676
Nrros	44.905311581479985	0.1550923005649407	0.28051590132105525	0.5528823850432454	0.5803439500811504	0.9852153260815123
ENSMOCG00000000803	34.75619909747257	-0.3003941704146833	0.46030219217654794	-0.652602085152503	0.5140128409592206	0.9827898691553396
Zfp317	231.69182768015685	0.2252157048753843	0.2737171113139051	0.8228046240671514	0.41061910669254703	0.9827898691553396
Fa2h	244.2108917742243	0.6423750515689255	0.37518545120913005	1.71215341506103	0.08686839983959872	0.9208099655702215
Cyth3	432.83377314178347	-0.09193149832850728	0.18592702009752618	-0.4944493720185776	0.6209888531431773	0.987131271738163
ENSMOCG00000000809	43.453912890039256	0.2905641927606683	0.3959569488171848	0.7338277396788992	0.46305373181934784	0.9827898691553396
Chic2	134.14402859743518	-0.030880039147577813	0.1761235343058264	-0.17533170265568684	0.8608190024690583	0.9937217263181438
Foxred2	214.42102356706735	0.21416465985245128	0.1570754537509681	1.3634508431342431	0.17274046668683193	0.9616795126262409
Rhoq	487.9347777371423	0.12368953142151126	0.1633781487841001	0.7570751189313799	0.449004859494595	0.9827898691553396
Zfp146	1420.255554679705	-0.015245162136561206	0.12587993235243272	-0.12110875698501741	0.9036048931634414	0.9961191772170136
Emb	70.85109613276326	0.1364429325944634	0.33618911697845977	0.40585172363924427	0.6848515514503638	0.9905110955795501
Kctd16	219.00295632177568	-0.14950593626434946	0.29611670085176184	-0.5048885653335481	0.6136371058495806	0.9867514538040189
Asic4	279.9705816493543	-0.058654900941223435	0.32191695903204565	-0.1822050665413516	0.8554217970258455	0.9937217263181438
ENSMOCG00000000825	111.81786484805605	-0.016803505692881297	0.26441782568448796	-0.0635490653831024	0.9493292896435833	0.9969498598140254
Immt	1854.4436428280546	-0.15720545493798857	0.12294961288151401	-1.2786169167485444	0.20103198984799006	0.9680367321633409
Cmtr2	65.16829253329618	-0.3964905978730526	0.3030896838295866	-1.308162629830651	0.19081815431209184	0.9672440546260765
Card6	70.5120870797589	0.15784631102140378	0.30737683313613173	0.5135270261291828	0.6075827107383766	0.9862180397819569
Stx6	313.34812817618774	-0.19720339556606423	0.17716001766819406	-1.1131371409965072	0.2656495344184901	0.9790994683758689
Esco1	591.5226772933762	0.17900171716867325	0.26273014293062735	0.681313971712556	0.49567284447652377	0.9827898691553396
Paip1	1316.897499637829	0.05867121216007696	0.17515432572710032	0.3349686735769792	0.7376487173100239	0.9912761673515791
Rtl6	2141.5509006411903	-0.19740532421181123	0.21279407557155522	-0.9276824257517015	0.3535723272734429	0.9827898691553396
ENSMOCG00000000836	708.7546646183151	-0.06546432470392091	0.15776110707908478	-0.41495857829587873	0.6781722262218852	0.9905110955795501
Rgp1	254.79847163468352	-0.022338041814096998	0.18556144864754978	-0.12038083328679573	0.9041814738016465	0.9961191772170136
Atp8b2	1263.1298631869586	-0.015260017449034192	0.14991150476083043	-0.10179350459712949	0.9189205814501613	0.9969498598140254
ENSMOCG00000000841	219.3031007856208	-0.0138284707626327	0.1855064434400426	-0.07454442285775476	0.9405771951406849	0.9969498598140254
Slc35c1	97.49757160348719	0.20187280391415438	0.21746959288055487	0.9282805988652997	0.35326203520773813	0.9827898691553396
ENSMOCG00000000843	2529.325592546768	-0.16178953474890298	0.1488625171173906	-1.0868386339411307	0.2771081304426548	0.9790994683758689
8030462N17Rik	1263.9311091231868	0.05270765089975682	0.14589480969352456	0.361271597053231	0.7178964241943924	0.9905110955795501
Gsg1l	125.52848258916855	-0.21681655734374386	0.29916287412876685	-0.7247441982069635	0.4686089748508428	0.9827898691553396
Smyd2	366.68064019112296	0.08724518484804102	0.1743374498269874	0.5004385743546392	0.6167662976718807	0.9870832312028577
Setx	1193.9929008800366	0.1225841779999256	0.18394498223814665	0.6664176239459496	0.5051442007023729	0.9827898691553396
Map3k8	27.220967768734734	0.27075353493035953	0.37751263934956286	0.717203893879833	0.47324829699119897	0.9827898691553396
Vps13c	2140.06646195955	0.26535309797195944	0.2072858500793418	1.2801312673797633	0.20049897372443573	0.9672440546260765
Akr1b3	885.6381293345114	-0.07706172786099197	0.1842893287494497	-0.4181562132974131	0.6758329075109775	0.9905110955795501
Stxbp5l	1047.1542351315693	0.12905530282556635	0.2786064353458846	0.4632172356871321	0.6432086631098239	0.9905110955795501
Zfp346	232.35525114771104	-0.1278427833617606	0.1688511039437264	-0.7571332397350936	0.4489700416878063	0.9827898691553396
Fgf13	2797.6227277835683	-0.1667510608595709	0.1345915812643709	-1.2389412420382437	0.21536725888873862	0.9771695158258967
Prpf40b	691.9846089236977	0.036940321200216945	0.17223061424954766	0.2144817363694327	0.8301714078496756	0.9932301794244984
Acad11	162.21021208679315	0.013560408419492074	0.2279833453285911	0.059479820334891284	0.9525699380560525	0.9969498598140254
Slc5a6	181.16323796779758	0.10313174869883987	0.29917449058288004	0.34472106394468605	0.7303040809812483	0.990650758600675
Aptx	194.58016637401764	0.06512581128680114	0.20956454421358903	0.31076731768339905	0.7559775169954959	0.9923968896676919
ENSMOCG00000000871	493.9556668090849	-0.09019201976013712	0.12922040887036035	-0.6979703945266243	0.48519570897303904	0.9827898691553396
Whamm	219.59220516827162	-0.09799604097154652	0.24403279298148506	-0.40156914886017614	0.6880011385417921	0.9905110955795501
Isg20l2	170.303659423947	-0.22291786437933453	0.1710472841519079	-1.3032528723540568	0.19248844476719612	0.9672440546260765
Shb	298.155610292688	-0.1265182108415402	0.1704748902689515	-0.7421515898437442	0.45799549550496893	0.9827898691553396
Ptprn	2889.5099597269964	0.06379839906482856	0.24535732613274022	0.26002239293361523	0.7948465004825983	0.9932301794244984
Parg	863.0556816516449	-0.1779254167969316	0.15866466490575815	-1.1213928249406617	0.2621206889404909	0.9790994683758689
Hdac5	1493.5039758448147	0.10823423457178372	0.16941257989216446	0.6388795604238932	0.522901285716501	0.9827898691553396
Pdrg1	708.6806184990505	-0.32039695807526214	0.17645985325160896	-1.8156932139029804	0.06941744561880742	0.9056038784335924
Parm1	651.2521394528541	0.3360889909829957	0.18325282135483562	1.8340180985929857	0.06665130762650047	0.9002990712532849
Tac2	147.42301821149513	0.24597216078026538	0.36223778085778463	0.6790350807632476	0.49711563447339246	0.9827898691553396
Dstn	2726.3897027950884	0.1616558821960278	0.24352652476991457	0.6638122165491472	0.506810505725962	0.9827898691553396
Ppm1k	1635.9348541114723	0.16031722673140503	0.1564086768353715	1.02498934186463	0.3053682166860224	0.9790994683758689
ENSMOCG00000000894	121.714367609707	1.127058488345263	0.3939404997607252	2.8609865932287364	0.004223249108403126	0.7243824912673226
Tmem267	52.01042640758894	0.9414254243531094	0.35159531340711425	2.677582403560162	0.007415560904527607	0.7793618429923805
Lrch2	658.0423556538899	0.25143796215681524	0.21986793436286517	1.1435863209677841	0.2527952372488466	0.9790994683758689
Jam3	290.3203917480087	0.3470452431159654	0.27908607345925013	1.243506129898804	0.2136813835021592	0.9747781114269546
Lig1	420.25307498569015	0.13281938926170436	0.1749428606761758	0.7592158305194108	0.4477234577684835	0.9827898691553396
Egfr	156.81654675030694	0.30899698205047654	0.32277644318268106	0.9573095824579559	0.3384110201320977	0.9808680905137676
Utp14b	130.56420003139024	-0.5626637614181699	0.2328147313928876	-2.416787623583166	0.01565815000475626	0.8796473849899012
Faim	256.9324499779067	-0.013907127858372226	0.22050217133567496	-0.06307025356771259	0.9497105613388107	0.9969498598140254
Brinp3	159.66958903316797	0.15910701524468046	0.25232459937506974	0.6305648186452668	0.5283251083814569	0.9827898691553396
Ano7	51.25450841442284	-0.27459805012565885	0.32619833299781553	-0.8418131619559741	0.3998925434022749	0.9827898691553396
ENSMOCG00000000908	200.03329298033196	-0.19009656326176994	0.18879509534033098	-1.006893547309017	0.3139859331876983	0.9790994683758689
Prkn	46.23210884946486	0.18607521549181535	0.2683710362799017	0.693350586826163	0.48808956393528535	0.9827898691553396
Tab2	1545.627661138119	0.014278220547262533	0.1563595416696533	0.09131659248163229	0.9272410341778748	0.9969498598140254
Mmp9	43.61479591839893	-0.06355869989623458	0.3560167203366732	-0.1785272889321862	0.8583088919565527	0.9937217263181438
Ercc5	727.7264883110819	0.17288753012597224	0.16988489678015314	1.017674516114901	0.30883266187822667	0.9790994683758689
Sncb	7016.627263213108	0.14586764670187843	0.2528694483600307	0.5768496259547925	0.5640410422963023	0.9852153260815123
ENSMOCG00000000918	1893.1422409294012	0.01615171497668735	0.21484143811199366	0.07517970052065887	0.94007173527793	0.9969498598140254
Rngtt	201.75014701883504	0.047109035362866605	0.19810341927327738	0.23780021332131168	0.8120360532086441	0.9932301794244984
Arfgap1	955.3689334458381	-0.18092161713306054	0.19132479841320144	-0.9456255468897801	0.34433960932161567	0.9827898691553396
9330159F19Rik	2855.1042185672236	0.07589739669870965	0.19313170767964788	0.3929825796632133	0.6943323478712746	0.9905110955795501
Cep76	105.48151028633524	-0.258619127875821	0.18255199518670434	-1.4166874901110738	0.15657431615730405	0.957385388462856
Mical2	3589.4586350268864	0.17852239625944125	0.46930711377013073	0.3803956748605403	0.7036517247201071	0.9905110955795501
Mrps35	364.9335923606767	-0.04529454335159131	0.14792098134176962	-0.306207699142685	0.7594465107193906	0.9931869895855268
Etfrf1	108.02408451466853	-0.12981597331647574	0.32815753332942293	-0.39559041049397203	0.6924072125454565	0.9905110955795501
ENSMOCG00000000927	694.1274895152444	-0.08994539752591695	0.11704658397086047	-0.7684581170545691	0.4422150642728173	0.9827898691553396
ENSMOCG00000000929	205.72409432694897	-0.032517358980701946	0.2607832858250529	-0.12469111614199192	0.9007680908005449	0.9961191772170136
ENSMOCG00000000934	28.89233460324626	-0.2660348811922794	0.37069236005477446	-0.7176702566866212	0.47296062682976525	0.9827898691553396
Scly	188.77827725470027	0.2758620824435439	0.27492017256970785	1.0034261213538167	0.31565530605159203	0.9808680905137676
Syt14	115.89403840698704	0.041245426275991814	0.2430596971729576	0.1696925765798276	0.8652519124326097	0.9937217263181438
Ndufaf5	333.0495394356514	0.04834284784750167	0.15782154252856256	0.3063133655454709	0.7593660637760649	0.9931869895855268
Nxf1	1878.412979537068	0.1565085121859572	0.24713495076223088	0.6332916963110347	0.5265431748249572	0.9827898691553396
Samd12	71.3545650920917	-0.2122788301567755	0.33955773041111414	-0.6251627076779029	0.5318642749091358	0.9827898691553396
Nkrf	395.79972943633516	0.06368735931133833	0.25681108263603153	0.24799303307949516	0.8041397972629309	0.9932301794244984
Pknox1	389.77114879564147	-0.18910335530375047	0.1971463340916878	-0.9592030010347707	0.33745648894173325	0.9808680905137676
Vps35l	988.4617862646944	0.11033374478895204	0.12659695084935943	0.8715355626553807	0.38346179693840854	0.9827898691553396
Psmd6	1025.8227743509133	-0.1128155988732316	0.1049845741418827	-1.0745921464687334	0.2825573695109648	0.9790994683758689
ENSMOCG00000000948	1582.7572429454754	-0.06018323586366881	0.1188534835096489	-0.506364930050897	0.612600489219149	0.9867514538040189
Galnt7	344.5229187542386	0.07288630567327214	0.24175401012238915	0.3014895415235226	0.763041223888334	0.9932301794244984
Fam162a	673.2539598528288	-0.07030265312968594	0.19113892470711988	-0.3678091902913545	0.7130155158182325	0.9905110955795501
Prps2	1571.8081322156725	-0.00926164091762228	0.28794069033101793	-0.032165099371593	0.9743403884360478	0.9986064803838273
Gpc1	991.8466467837623	0.07743807956014771	0.18144821923216212	0.4267778426696272	0.6695411465269301	0.9905110955795501
Sfrp4	60.75676140085367	0.3087445714706237	0.47281625947131267	0.6529905968459112	0.5137623405934832	0.9827898691553396
Thy1	5419.596952421603	0.06383440664291995	0.20382914769862293	0.31317604652551473	0.754146915825933	0.9923968896676919
ENSMOCG00000000955	2273.906704526151	0.14207085660026342	0.23071841195432785	0.6157759816255464	0.5380423815444091	0.9827898691553396
Hs6st1	697.9697924128079	0.07868785939217537	0.22426091549058288	0.3508763853034374	0.7256810883433622	0.9905110955795501
Rfx4	264.85818770442086	0.14864080278133607	0.20733577607395468	0.7169086088081457	0.4734304897145314	0.9827898691553396
Tmem91	242.30461937487	-0.20144019284986436	0.24394993244897176	-0.8257439993019905	0.40894932730387584	0.9827898691553396
Sin3b	1975.0225917691353	-0.15105324059338976	0.14857253564282413	-1.016696928135691	0.30929762753395185	0.9790994683758689
Tspan4	139.61263170257726	0.06916498930847684	0.26778954216376694	0.25828114402682284	0.7961899375802781	0.9932301794244984
Fli1	50.49665988950728	0.08630344518225974	0.3506307623613257	0.24613768797993793	0.8055756495235383	0.9932301794244984
Fos	364.41715577051565	-0.42393800938825527	0.5775355874964024	-0.7340465567256426	0.46292036374856843	0.9827898691553396
Nos1	449.0967519308624	0.26041149327813307	0.30545749519331217	0.8525293940269129	0.39392033176457647	0.9827898691553396
2410004B18Rik	286.2441613072638	-0.16634471376069382	0.17390753464250158	-0.9565124024249179	0.33881342143759385	0.9808680905137676
Jmy	264.80667877172914	0.3035028390909759	0.22754504526935196	1.3338143167727974	0.18226471777791697	0.9662432145671542
Nars	2978.3000473129346	0.09398338879752353	0.19280317613079523	0.48745767929552364	0.6259340269366869	0.9895369891543592
ENSMOCG00000000975	82.86636356497036	0.15180728690640993	0.23968441983362077	0.6333631823536482	0.5264965021419616	0.9827898691553396
Acot5	255.7312491943672	-0.42073126029987046	0.23759789296922496	-1.7707701656864692	0.07659892903929619	0.9066875931076556
ENSMOCG00000000983	1270.7724896611721	0.025784132213632086	0.16929234383630412	0.1523053649641938	0.8789460936581461	0.9947670066976839
Tram1l1	267.9322723552826	0.014848993181564792	0.1680783410577215	0.08834566719376026	0.9296019436530667	0.9969498598140254
ENSMOCG00000000987	78.05439525618134	0.22174609482507943	0.4823980839339973	0.4596744933493956	0.6457498803425719	0.9905110955795501
Igsf9	47.68922258526814	-0.16849786755959703	0.43437215353330455	-0.38791130183873035	0.698081674111634	0.9905110955795501
Syt7	4225.557622913127	0.14498107775353888	0.21190234487838333	0.684188170908385	0.4938563508831258	0.9827898691553396
Sec61a2	895.9914266203097	0.2499077027048969	0.17322979320645893	1.4426369626098416	0.14912276532038388	0.9564021971810307
Gtf2h5	291.32574759893294	-0.048654196406825584	0.17658940522392816	-0.27552160530315245	0.7829155292744711	0.9932301794244984
ENSMOCG00000000994	247.67661447968578	-0.036944186294723964	0.30383751459838165	-0.12159191844218943	0.9032222141460159	0.9961191772170136
4932438A13Rik	2651.3408496177985	0.1401097884802291	0.22959341924490104	0.6102517613136716	0.5416950462872481	0.9835123935726917
Rasip1	40.64791469547419	0.06439164203062457	0.3165047529572499	0.20344605074326297	0.8387864090546173	0.9932301794244984
Polr3c	258.19551108581874	-0.1292730034351661	0.15173705532399392	-0.8519540804264202	0.39423957903296347	0.9827898691553396
Sgsm3	735.4613719608127	-0.186825630691366	0.1566624199817551	-1.1925363511755003	0.23305100603915027	0.9790994683758689
BC024978	100.49765136860724	0.26698918176979275	0.17108748385801847	1.5605418686931	0.11863188382442129	0.9446087516488444
Ankrd16	115.77693363328655	0.19029121744493666	0.2821003436326923	0.6745515265756096	0.49996073864567414	0.9827898691553396
ENSMOCG00000001006	570.9761137813327	0.024469958373414626	0.14818016648477517	0.16513652909094823	0.8688365216362034	0.9937217263181438
Clstn2	192.74504122758358	0.5670990254217387	0.38124386233384916	1.487496800473444	0.13688364762993102	0.9564021971810307
Tmem183a	529.8051202582044	-0.07148269256896538	0.12010448356700712	-0.5951708915936073	0.5517292454688979	0.9848857854361492
Prkch	480.5223783292449	-0.8641779276182778	0.3612779182323598	-2.392003175412654	0.016756697401496403	0.8796473849899012
Caps2	48.850322832333354	0.3222971679280337	0.497962289260014	0.6472320793748787	0.5174817523720392	0.9827898691553396
Zfp869	379.1172174097429	-0.002910489041173949	0.15094189672531572	-0.01928218145072379	0.9846159984295373	0.9991581039407021
Snx27	4101.230508661103	-0.08933647422164785	0.10958535121800689	-0.8152227759340176	0.4149448030087765	0.9827898691553396
Ankmy1	131.4182408683736	0.13108220949725696	0.6974196067425995	0.1879531464701654	0.8509133802084416	0.9937217263181438
Rbx1	852.0419638044967	-0.09253910887091699	0.14992533652542453	-0.6172346250176606	0.5370799804545037	0.9827898691553396
Ric8b	1785.5320070331425	-0.36050794295378874	0.19930769494546144	-1.8088009248836987	0.07048193656657398	0.9056038784335924
Atp6ap1	2432.0445492433973	0.09723238241520805	0.23148680706500158	0.42003422850748107	0.6744604490839923	0.9905110955795501
Ash2l	2757.273777650516	-0.246359911752594	0.1264968943034127	-1.9475569982112009	0.051467993371629675	0.8896038645099562
Mafb	63.33571065861341	-0.19010726261361915	0.2514528310776782	-0.7560354830719392	0.4496279217623473	0.9827898691553396
Vapa	3177.534888597127	-0.060547892345526926	0.1871958288897976	-0.32344680276595017	0.7463568892382418	0.9920885963044056
Plekhn1	283.9780009172961	0.18637024135200253	0.2705677919687373	0.6888116283017774	0.49094181701463624	0.9827898691553396
Fahd1	155.2548352568283	-0.03850418103427514	0.16553047758160044	-0.23261082549160164	0.8160636203534439	0.9932301794244984
Lrpap1	977.7355505290689	-0.13370367387609425	0.18793231504330768	-0.7114458939394387	0.4768079679938844	0.9827898691553396
Rhpn1	469.3490977856894	0.06988766759490012	0.3572807806840798	0.19560992746681563	0.8449154894000952	0.9937217263181438
Tiam1	1528.787219006478	-0.021501815895922326	0.26839362756154245	-0.08011298960886087	0.9361473917413613	0.9969498598140254
Stau2	1746.3835248763373	0.08316559587140322	0.21622217754483233	0.384630276208181	0.700511359478385	0.9905110955795501
Ndufaf4	1046.2344836655207	0.25095993157948854	0.22002067970285552	1.1406197450095028	0.2540281969027317	0.9790994683758689
Cmtm5	218.62470787456328	0.4357686479298443	0.34005457647128967	1.2814667941004336	0.2000297561103654	0.9672440546260765
ENSMOCG00000001041	559.4810126358495	-0.08974028652951235	0.09156714731445918	-0.980048949448288	0.3270619568581342	0.9808680905137676
Prmt3	393.1671386541869	-0.004520590166639151	0.1048572583703372	-0.04311184782910526	0.965612374879396	0.9983627149610678
Gtf3c6	466.93720837260827	-0.13575058918478877	0.22231867285067938	-0.6106126284586353	0.5414560603326626	0.9835123935726917
Inhba	58.767269717424966	0.419640964552234	0.3877297318108652	1.0823027746475091	0.2791180134964671	0.9790994683758689
Fam122a	182.46936868698862	-0.05085196065273299	0.18521419691713437	-0.27455757441468903	0.7836561647435125	0.9932301794244984
Atxn7l1	268.55048408875	0.2848928109859425	0.22549458329386848	1.263413102099509	0.2064407579439774	0.970731939942315
ENSMOCG00000001053	593.876905102218	0.075940325268028	0.24469349732332035	0.3103487673302815	0.756295749637091	0.9923968896676919
Ggct	359.77003304442627	0.22097681283968132	0.31967497415132945	0.6912546514669432	0.48940552470172305	0.9827898691553396
Golga1	851.7688677274451	0.0657183932454004	0.1951169607078132	0.33681537989828264	0.7362560783494864	0.9912648443852765
Gatad2a	463.07282041816006	0.22168276071236642	0.1337873316639302	1.6569787135692857	0.0975237787782313	0.9331295853423318
Dtd1	370.0285467964552	-0.27540795935612034	0.1281336871734266	-2.149379803481037	0.03160430509706414	0.8841458178596813
Pou3f4	136.1493528209302	-0.6239229693083304	0.38198453999719645	-1.6333723069339654	0.10239071771648182	0.9379113477836039
ENSMOCG00000001064	28.59624174548678	0.3453674121329603	0.5078965367041012	0.6799956037781967	0.496507244536589	0.9827898691553396
Tfeb	111.40034568826906	0.4333285314401824	0.2977762756290721	1.4552150957115277	0.14560972302228062	0.9564021971810307
Cuedc2	670.2113882665323	0.026736520543880385	0.11453820517938075	0.23342884151194568	0.8154284193937602	0.9932301794244984
Tspan6	353.4668258052891	0.41160507370611515	0.20667212810769653	1.9915848231437787	0.04641662994176349	0.8854355124960115
Inafm2	61.85085702806964	0.1455222546657061	0.4139670889714331	0.35153097563209484	0.7251900382200892	0.9905110955795501
Cast	340.28041317258857	0.10117449612679602	0.18804308390613572	0.5380389112172753	0.5905501853535489	0.9852153260815123
Dlg1	3554.6598504721637	-0.14411299536895097	0.16237155051737495	-0.8875507741950757	0.37478244272082833	0.9827898691553396
ENSMOCG00000001074	3601.431755553034	0.14015487172298885	0.1479935045201067	0.9470339402899073	0.3436214843937808	0.9827898691553396
Npy1r	140.8861520064722	-0.17752818075818302	0.2988948010669057	-0.5939487074532437	0.5525464200401905	0.9852153260815123
Nsg1	2272.280281466108	-0.16705044463094323	0.20575665518234623	-0.8118835547890265	0.4168584516506642	0.9827898691553396
ENSMOCG00000001081	609.2480028617588	-0.058731391416997125	0.15090973421818982	-0.38918225998649975	0.6971413255358807	0.9905110955795501
ENSMOCG00000001089	1699.9387766765756	-0.1290446679539924	0.13101243612306257	-0.9849802947926117	0.32463375025608154	0.9808680905137676
ENSMOCG00000001091	522.2709634107009	-0.1409767279125407	0.15344602304782815	-0.9187382319357938	0.35823250732728923	0.9827898691553396
Abcg1	549.2215492793486	0.12580699475024046	0.1983668090552557	0.6342139360380422	0.5259412139162448	0.9827898691553396
Ier5	121.31697631458991	-0.05024715553202814	0.4563571341888351	-0.11010489760687397	0.9123261840477234	0.9967185265324758
Rnf122	48.64489229001299	0.30165729045645046	0.39594161422530916	0.7618731641700927	0.44613570797409335	0.9827898691553396
Hilpda	125.05324739097603	-0.21688827872661204	0.19308179146856314	-1.123297422698323	0.2613111980558674	0.9790994683758689
ENSMOCG00000001098	227.7374492629618	-0.27374627683322156	0.19823657865187164	-1.3809069884824559	0.16730756091563212	0.9616795126262409
Stk4	1020.9684013859868	-0.14826887837622446	0.16801225126315764	-0.882488492723015	0.37751269988914404	0.9827898691553396
ENSMOCG00000001103	675.8071193698491	-0.20180363836248572	0.11076876200697797	-1.8218461117203146	0.0684783388435911	0.9035269408723644
Slc30a4	325.45545907656447	0.08117111263661111	0.24461360227969503	0.33183401037444676	0.740014601443634	0.9914566743662293
Thop1	528.5992973568274	-0.0628257662089113	0.14582684434475665	-0.4308244239337835	0.6665960391508905	0.9905110955795501
Ap3m2	1662.7383848510597	-0.0874502107002784	0.16129711821037815	-0.5421684632097271	0.5877024585241791	0.9852153260815123
Katnbl1	201.2776656882219	0.16094715090327766	0.23972574243352548	0.6713803418417083	0.5019782648204847	0.9827898691553396
Zbtb5	183.03156608028775	0.03322705770276834	0.14418408792844553	0.23044885313043686	0.8177430031871119	0.9932301794244984
Fscn1	2540.7546932370046	-0.16677293444743063	0.2608114309944196	-0.6394387462679845	0.5225375497258669	0.9827898691553396
Rrp1b	312.10971156129557	-0.00435786927624412	0.14767577619727354	-0.029509709638652144	0.9764580751432494	0.9989651020729368
Pkn1	500.3770057320923	0.004133712641742353	0.1406942686365273	0.02938081758270821	0.9765608715515119	0.9989651020729368
Igsf10	61.623034067972	0.26233755279826687	0.23704670883361223	1.1066913946584545	0.2684273771723306	0.9790994683758689
Iqca	64.42443097726343	-0.020707730781052907	0.5449371032028957	-0.03800022178585778	0.9696875051977276	0.9983627149610678
Med27	356.7426369504823	-0.3017840726748603	0.14940130725047124	-2.01995603806143	0.04338794778451558	0.8854355124960115
Rnf144b	326.8030153769516	-0.2026457315671627	0.1789770542374202	-1.1322441998533794	0.25753178233787977	0.9790994683758689
ENSMOCG00000001129	74.42155612933931	-0.299473822131421	0.24652927403598263	-1.2147596803765817	0.22445776291873376	0.9790994683758689
Plod3	323.2652766644338	0.24008298071532658	0.257417374372434	0.9326603586903662	0.3509953584565425	0.9827898691553396
Sin3a	867.7831560363354	-0.18102778862449448	0.1277635574826188	-1.4168969007388654	0.15651307278493334	0.957385388462856
ENSMOCG00000001133	675.1751166832436	-0.018925175072644927	0.1893306295369426	-0.09995833806147149	0.9203774011400958	0.9969498598140254
Mro	166.15859616714155	0.15125967139414698	0.19130085946783837	0.7906899729301888	0.42912492875205843	0.9827898691553396
Plpp6	55.40786733656726	0.3373083370555842	0.32060058001085134	1.05211393268274	0.2927472805768794	0.9790994683758689
Marf1	3409.4210991728064	0.07302497307909883	0.1550182642518301	0.4710733501729085	0.6375883553801944	0.9905110955795501
Tril	201.35504811853968	0.5303851350837134	0.3567013437465061	1.4869165602601087	0.13703684988669187	0.9564021971810307
Prim1	134.15272744902535	0.08394091793902171	0.22730904304688024	0.3692810317348867	0.7119182624498307	0.9905110955795501
Lpl	37.764377856987224	-0.4009623778439727	0.4714282677644721	-0.8505268038875757	0.39503226478670117	0.9827898691553396
Cfl2	702.9987647953935	0.11652079106235048	0.1533774692048738	0.7596995286622441	0.4474342105643802	0.9827898691553396
Cers2	434.66701742189986	0.21100018817662494	0.2823337499716148	0.7473431291789892	0.45485646472942565	0.9827898691553396
Ist1	963.2819544688534	0.008115193622954521	0.08553668709387295	0.09487383599564049	0.9244150386088076	0.9969498598140254
Csk	469.7173368486856	-0.060636241687347346	0.15942209020289488	-0.38035031161726846	0.7036853934327486	0.9905110955795501
Qpct	101.3704039253658	0.2829444889603512	0.2872447738436385	0.9850291971347469	0.3246097295367278	0.9808680905137676
Klhl24	2432.374291927481	0.11138554505280968	0.13845954123622725	0.8044627626114523	0.4211297666330088	0.9827898691553396
ENSMOCG00000001151	98.25166357172056	0.2678140274213394	0.4768759144961439	0.5616010775136453	0.5743878461134275	0.9852153260815123
Pcdhb18	36.627420429038025	-0.21585569524062137	0.32811761462413275	-0.6578607353582333	0.510627623087197	0.9827898691553396
ENSMOCG00000001154	132.0954498931636	0.20374098071465013	0.22796377291623818	0.8937428000435476	0.3714595198508776	0.9827898691553396
Stard4	143.4051207874321	0.06896814809630122	0.3203455043253196	0.21529301071839668	0.8295388785069144	0.9932301794244984
Sh3bgrl3	1717.307817782848	-0.13720829199954343	0.15132176014430107	-0.9067320646330113	0.3645485027964265	0.9827898691553396
Ppp1r13l	51.818254986363854	0.19036746364277016	0.3150158822168582	0.604310685236246	0.5456371036162816	0.9835123935726917
Lum	67.2523382567147	-0.2148507147583422	0.5953799369393984	-0.36086320923543497	0.7182017077585547	0.9905110955795501
Dock4	1471.9945038092287	-0.1646637051711635	0.24576575574175855	-0.6700026400105389	0.5028561072532992	0.9827898691553396
Dennd5a	4574.598223849353	0.013497902779715343	0.11401141655213012	0.11839079969279757	0.905758015292685	0.9961191772170136
ENSMOCG00000001163	158.2679383281872	-0.12985514735605347	0.3487085142119819	-0.3723888063057554	0.7096033868959601	0.9905110955795501
Gucy1a2	167.0418349238453	0.20628086940141058	0.2878262546288	0.7166853825320563	0.4735682473157593	0.9827898691553396
ENSMOCG00000001169	128.4485832598666	-0.1893623515142839	0.20539549685318972	-0.921940132161876	0.35655980424302897	0.9827898691553396
Epha3	45.08956444499318	0.7201228275375152	0.34892880849732455	2.0638101813339866	0.039035717360925405	0.8842741452865222
Kirrel3	288.7867563719494	-0.24852463965479665	0.26133189425157194	-0.9509923783568249	0.34160824489806524	0.9826737213166676
Slc1a4	608.2291225790714	0.078931801276490507	0.23480198524870804	0.33616326196255963	0.736747755119302	0.9912761673515791
ENSMOCG00000001177	73.18316357265726	0.23211458252128667	0.44332911915762796	0.5235717043859623	0.600576466263331	0.9858063125051496
Maml1	245.66154808748408	-0.06326257982562228	0.12392118702524045	-0.51050656747451	0.6096966147049012	0.9867514538040189
Kcns2	108.64346112616828	0.26308809587008886	0.32246155589992576	0.8158742989869368	0.41457203296933853	0.9827898691553396
Dixdc1	1986.1006338380575	0.11054999874363668	0.13122047257599262	0.8424752370832591	0.3995219949355791	0.9827898691553396
Rbm46	50.74712970563992	0.4500620565726487	0.39175734871197154	1.1488286258123113	0.2506266531228641	0.9790994683758689
ENSMOCG00000001189	34.10612353024728	0.315602998416262	0.38631922580995753	0.81694872357069	0.41395773181961526	0.9827898691553396
Ints13	543.6739574705764	0.19844399559025777	0.18833882429409202	1.0536542124760557	0.29204125915063717	0.9790994683758689
Mtf2	611.7056418344149	0.15120293397856835	0.17603132443361655	0.858954702892034	0.39036550738128467	0.9827898691553396
Aox1	180.09945301558878	0.4982707908883114	0.3125168825996789	1.5943803955275448	0.11085086066580013	0.9402330488920683
Kcnb1	638.4607673280223	0.011235243407933184	0.2943782242436881	0.03816601393258144	0.9695553180955245	0.9983627149610678
Lmf2	62.02516930416152	0.35465975858532134	0.2693877709689769	1.3165399353861704	0.18799288371978115	0.9672440546260765
Ncaph2	782.054852342826	-0.09764896766940553	0.09870528987737302	-0.9892982209030557	0.3225172542577641	0.9808680905137676
Rfesd	195.86788420534418	-0.24312174322265542	0.20514656598010023	-1.1851124198015526	0.23597300114484787	0.9790994683758689
Ptrhd1	116.3408187539224	-0.22215307849501548	0.19658103367354632	-1.1300839879799165	0.2584408360516225	0.9790994683758689
Tmem125	130.2003497941346	0.5715838348447866	0.4829597670964812	1.1835019680440604	0.23661026701011711	0.9790994683758689
Itpr2	304.66546596349866	0.12511443289668567	0.28419671133768076	0.4402388483237073	0.6597641257933473	0.9905110955795501
Ubqln1	4673.503751919432	-0.022342182289291496	0.13023625857135426	-0.17155116811844368	0.863790400369404	0.9937217263181438
Nudt17	51.5656200856146	0.7153338451626797	0.2908723493728486	2.459270696252204	0.013921960126643772	0.8722013868111674
Bccip	572.7138747493979	-0.22032408559595187	0.14592885952988038	-1.5098047521630793	0.13109325211265122	0.9558200103771892
ENSMOCG00000001215	588.5143066289853	-0.03211343841060025	0.15430643109054934	-0.2081147116399549	0.8351394004191212	0.9932301794244984
ENSMOCG00000001218	209.52491490783697	0.0476986265350802	0.18640121108578508	0.2558922565858677	0.7980340339614896	0.9932301794244984
1810010H24Rik	253.66977168565558	-0.14364217493980014	0.14811687205717083	-0.9697894165923007	0.332151469264249	0.9808680905137676
ENSMOCG00000001220	624.5073268442328	-0.013782361477154196	0.2313148623891508	-0.05958268887179218	0.9524880061495299	0.9969498598140254
C1qtnf12	29.023400213126365	-0.17885641262192223	0.3305005231633987	-0.5411683192207718	0.5883915717233912	0.9852153260815123
Amer1	69.91307467112883	0.1902225013921447	0.32981077555987365	0.5767625423069654	0.5640998766036948	0.9852153260815123
Ralgps1	1373.1681316469808	0.056604577755780455	0.15708254812833394	0.36034924585979733	0.7185859765253917	0.9905110955795501
Psma1	1011.3085810908074	-0.11389202230548588	0.09449741366581575	-1.205239570981889	0.2281108302983252	0.9790994683758689
Has1	98.05511837757163	-0.07372035722713798	0.2671540348981884	-0.2759470103277032	0.7825887661069378	0.9932301794244984
ENSMOCG00000001232	282.13434768551406	0.14676794737078483	0.19347214622657882	0.7585998823773948	0.44809194307914413	0.9827898691553396
Zfp69	32.021240218795796	-0.21073720174049923	0.33335903685993473	-0.6321628587769267	0.527280464132687	0.9827898691553396
Pnma3	972.2749318211565	-0.04126942098340451	0.2097153813966777	-0.196787764009275	0.8439936267948298	0.9937217263181438
Apln	104.48034018764756	0.4473341505178239	0.35906322291424936	1.2458367272680977	0.21282434299436093	0.9739863498546697
Gclm	417.0580689165484	0.18132358080769354	0.13990363548395057	1.296060536100183	0.19495462973262104	0.9672440546260765
Aip	888.88696967353	-0.340741493121668	0.10254553502406157	-3.322831101731689	8.910885010019572e-4	0.5486873934413619
Efcab1	114.75212342777276	-0.21873934723230729	0.511662787075044	-0.4275068516957155	0.6690101956798407	0.9905110955795501
Pcmt1	1557.5516714833948	-0.17451398285273795	0.15867118271546085	-1.0998467388100799	0.2713989040894185	0.9790994683758689
Trim32	1004.8465065259812	-0.3516927796525997	0.23864974115521895	-1.4736776078204796	0.14056841463793268	0.9564021971810307
Scmh1	1375.1931984135142	0.11047834980893641	0.2135329490974662	0.517383149888072	0.6048887198658575	0.9858063125051496
Abcb8	393.57297425857263	0.002696500863657878	0.20958714633186246	0.012865774026944433	0.9897348807362558	0.9991581039407021
Arl6ip4	1130.8752100593108	-0.13819740631348268	0.13551379222707374	-1.0198032542836093	0.3078217794997462	0.9790994683758689
Nfyb	881.593970019169	-0.05875565994840186	0.21370051341204882	-0.2749439344355319	0.7833593125694887	0.9932301794244984
Kif20b	102.32118604910347	-0.18787306561291256	0.3440020578097517	-0.5461393655872101	0.5849701419492939	0.9852153260815123
Gna11	1814.406161510603	-0.18521795996368534	0.16943469038783962	-1.0931525270280689	0.27432683658921714	0.9790994683758689
Cript	730.6660892033146	-0.025220980932776207	0.2840387188127816	-0.08879416523984573	0.9292454948395505	0.9969498598140254
Slx4ip	31.203355331941363	0.11709657416258479	0.3244381856021828	0.36092106095724935	0.7181584589235255	0.9905110955795501
Smad7	163.1659178329706	0.0767525586851622	0.22688443048661056	0.3382892273416342	0.7351452410238968	0.9909445947637578
Neurl2	152.94329861978827	-0.22625042987010804	0.2615058949729306	-0.8651829049342388	0.3869384067206136	0.9827898691553396
Gspt2	311.88682649979614	-0.09834155273059561	0.261010683901464	-0.37677213538017945	0.7063429500348042	0.9905110955795501
Papss2	52.07250004792576	-0.1112288477803094	0.3317482113878758	-0.3352809268058481	0.7374131801206849	0.9912761673515791
Zfand2b	253.61163753544383	-0.09279162667896425	0.1424835151327811	-0.6512446481439714	0.5148885730514694	0.9827898691553396
Gnb1l	44.6668086471308	0.235393605580076	0.3665398897555171	0.6422046062628655	0.5207403425974271	0.9827898691553396
Dll1	108.02396353207453	-0.08823257972665698	0.2240598405575371	-0.39379024597671897	0.6937359063595059	0.9905110955795501
4931406P16Rik	476.2127850744843	0.20636332293803494	0.11483611617472923	1.7970245756486767	0.0723317183496896	0.9066875931076556
Prkag2	1391.3349749080949	-0.03857251330821395	0.14653421585116577	-0.26323212694154585	0.7923716699895054	0.9932301794244984
ENSMOCG00000001288	66.4127753358451	-0.3135183404059611	0.2711278566450362	-1.1563486846592197	0.2475385621849622	0.9790994683758689
ENSMOCG00000001290	89.72888182349844	0.41869771549099855	0.2392815715485638	1.7498117919457956	0.08015079524886884	0.9066875931076556
Tmem192	257.60312317585596	0.12511267417233987	0.18939803608967823	0.660580630905276	0.5088812938673092	0.9827898691553396
Phf21b	108.34298058111064	0.21228377930747702	0.25203366780242853	0.8422834185545727	0.3996293301672323	0.9827898691553396
ENSMOCG00000001293	144.2693528898601	0.10565914468578773	0.3623280671322376	0.29161181335484476	0.7705834420919665	0.9932301794244984
Polr2j	469.87759470965926	0.04605616455997743	0.20576787098626578	0.22382583023883015	0.8228928301972547	0.9932301794244984
Zdhhc24	109.34006357247154	0.18290670104846238	0.31470232690548133	0.5812054294196469	0.5611020088464556	0.9852153260815123
ENSMOCG00000001296	54.95029937652401	0.16836097157313337	0.26599418371826894	0.632949823261756	0.5267664103016007	0.9827898691553396
Taf1	1789.7900222872192	0.2547892873394053	0.20899979384633044	1.2190887017177736	0.2228105276665833	0.9790994683758689
Kcnj4	1057.4724709355974	-0.13492735645015913	0.35996912590020763	-0.37483035833346534	0.7077866349027077	0.9905110955795501
Idh2	511.1821064377481	0.2069775927702963	0.2302394770978941	0.8989665689793621	0.36867046793390357	0.9827898691553396
ENSMOCG00000001310	39.92417798229526	0.40618042773126795	0.3377855479597632	1.20248018360943	0.22917753926477957	0.9790994683758689
Tasor2	819.465185298747	0.13716782361633054	0.12595670577588808	1.08900770920756	0.2761504860791968	0.9790994683758689
ENSMOCG00000001313	2431.591697415578	-0.15925267756331926	0.1330128975060057	-1.1972724491332039	0.23120037928928433	0.9790994683758689
Mdh1b	32.05569786470564	0.07978841295277117	0.4150026824916783	0.19225999329382912	0.847538554471844	0.9937217263181438
Ufm1	1094.4748556366021	0.07971230550346342	0.12779708249007135	0.6237411993318105	0.5327975614554361	0.9827898691553396
Polr3gl	669.0129447999518	-0.07995560554536199	0.15431049659602777	-0.5181475486705173	0.6043553272486641	0.9858063125051496
ENSMOCG00000001318	68.68427073362213	-0.40447658649959584	0.3064835426082539	-1.3197334612403522	0.18692402402661115	0.9672440546260765
Fras1	470.92203323837964	0.41027633054700374	0.36301871112209355	1.1301795691986138	0.25840056688529445	0.9790994683758689
ENSMOCG00000001320	56.92804638023909	0.18663372360799138	0.3980750232968253	0.4688405769905027	0.6391835936397691	0.9905110955795501
Atf5	109.22343359407635	0.42983830019529984	0.3402415514385308	1.2633327657305722	0.20646961560470367	0.970731939942315
Cdk5r2	951.5297250767215	0.013074937517401604	0.23462154926419795	0.05572777759931352	0.9555586705577678	0.9980182914567937
Acvr2a	918.6148220354465	0.12729314497906757	0.2107461045149739	0.6040118524232232	0.5458357621597246	0.9835123935726917
Zgpat	336.5061264359364	0.20986244414733332	0.15312451941629285	1.3705345489234784	0.17052009827058281	0.9616795126262409
Pbx4	73.58200160369779	0.3265599605878623	0.3178117356056288	1.0275264378313869	0.30417264300241126	0.9790994683758689
Mysm1	991.536630142096	0.2797029346048391	0.2756328863626946	1.014766192437534	0.310217292789363	0.9790994683758689
Mecp2	397.01375531133107	0.32379847697455316	0.23584514464830117	1.3729283147101055	0.16977463315098607	0.9616795126262409
Mcat	217.135984829933	-0.4032974075630474	0.20057758990773272	-2.010680294586087	0.044359236740770865	0.8854355124960115
Gprin3	312.85525216281917	-0.2548914124327477	0.44346095000387364	-0.574777581725113	0.5654417302972171	0.9852153260815123
Slc43a3	44.37317983274228	0.6903825733926694	0.532924458505379	1.2954604773233562	0.19516142693697835	0.9672440546260765
Prkacb	13373.200472500243	-0.2366514663624641	0.1596066802321172	-1.482716550574826	0.13814973546525536	0.9564021971810307
Actr10	1851.5343748987784	-0.16807915366213508	0.11006167891718967	-1.5271360142397765	0.12672719314557737	0.9509305823165412
Gar1	141.02239599738795	-0.25538036824675064	0.20904532198851739	-1.2216507206067897	0.22183973927091744	0.9790994683758689
Psma4	1368.269048547145	0.029156831293522482	0.12883081814039818	0.22631876219048566	0.8209535068141051	0.9932301794244984
Notch3	118.35713704238523	0.7375180894962335	0.3889512133871745	1.8961712011991705	0.05793740996891473	0.8906097992566931
Lrrtm3	348.15966843617525	-0.224374256467295	0.2603883836341447	-0.8616907303459018	0.38885772792165607	0.9827898691553396
ENSMOCG00000001346	312.3079347819932	0.2001823651295958	0.1899572298749771	1.0538286184808472	0.29196138844847735	0.9790994683758689
Hps6	71.59562591133493	0.3671835489512745	0.2504088134305517	1.4663363638081732	0.14255667347072432	0.9564021971810307
Spin2c	95.50351871901601	0.04910820134960263	0.30893010074851857	0.15896217697989445	0.8736986732553947	0.9937217263181438
Sem1	722.6258679497765	-0.10850109841771538	0.22698119729400823	-0.4780180019809048	0.6326373922453645	0.9902831134386583
Kif5c	12659.726364497441	0.07591081981345092	0.1616306253726854	0.4696561659550405	0.6386006898673731	0.9905110955795501
Trim21	210.9297487849144	0.3303102478939461	0.33640314879355887	0.981888097892473	0.3261549799762588	0.9808680905137676
Pcgf1	197.67412347331464	-0.1392598738438483	0.21129047858511343	-0.6590920460608958	0.5098366629856773	0.9827898691553396
Atp2b4	2048.6505810765734	-0.020974866804982804	0.3434378591880346	-0.06107325166355326	0.9513008714545109	0.9969498598140254
Fam53c	1125.4448026682717	-0.08750581698602493	0.13855800505064184	-0.6315464556092754	0.5276832840981566	0.9827898691553396
Sdhaf2	240.60696727111343	0.10445126526856667	0.17264549787504907	0.6050042807612772	0.5451761523739431	0.9835123935726917
Pkp2	126.67311359958514	-0.05926345471835552	0.26645561299907644	-0.2224139850210659	0.8239916259784437	0.9932301794244984
Scamp1	2846.3878927139463	0.0543141334671428	0.17566730682845103	0.30918748882615704	0.7571789104330177	0.9923968896676919
Tmx2	938.072493170079	0.03540094531019105	0.18456656977736657	0.19180583652225558	0.8478942989692079	0.9937217263181438
Nr4a1	746.1075082636412	-0.4697461387527095	0.53355578033753	-0.8804068029317305	0.37863897248505657	0.9827898691553396
Zfp786	195.66224557727767	-0.2433072606652512	0.18060559471235288	-1.3471745493419631	0.1779240227170837	0.9642282064302609
Brd3os	82.69492941018184	-0.31600305871777334	0.22396135813561857	-1.4109713450050585	0.15825306342623696	0.957385388462856
Bbof1	51.00406757995347	0.01347993602120356	0.3068476061794887	0.04393039329535636	0.9649598883339018	0.9983627149610678
Dnase2a	119.41919203504592	0.08809705739492675	0.22586688414476963	0.3900397250730251	0.6965071722370899	0.9905110955795501
Ldhb	8187.338566161484	-0.24823905882458813	0.1419395012660168	-1.748907503622613	0.08030700932977988	0.9066875931076556
ENSMOCG00000001381	1143.8726564235033	-0.2089180769593605	0.26026189529536964	-0.8027224912131706	0.4221351501973176	0.9827898691553396
Chdh	54.224644883892225	0.2280861777313899	0.3512714152804324	0.6493160781366187	0.516134095503443	0.9827898691553396
Appbp2	1772.5949097787561	-0.054412603830613165	0.13239174600493678	-0.4109969501314996	0.6810747710567928	0.9905110955795501
Carhsp1	266.5826567535595	-0.2753790511646752	0.42505158974645124	-0.647872064962614	0.5170677000070547	0.9827898691553396
Zbtb45	243.67996330746007	-0.28442456148959144	0.19916863470078755	-1.428059000941009	0.15327487696357592	0.9564021971810307
Tubb4b	3682.5739365001236	0.11595989253729297	0.1835121041246906	0.6318923380579949	0.5274572303216889	0.9827898691553396
Bmyc	473.25971253262577	-0.4071543090315959	0.18866143621232895	-2.1581215388043806	0.03091838355240004	0.8841458178596813
Mcub	54.69933713130384	0.5368724009200294	0.34861986130968964	1.53999373100292	0.12356188153084771	0.9488269863812795
Baz1b	4222.949635833392	-0.06874795255508123	0.1730870340826338	-0.397187189204826	0.6912294284220182	0.9905110955795501
Wdr35	647.9302796603245	-0.03002303970388109	0.13156545972395228	-0.22819849348662455	0.8194919325691261	0.9932301794244984
Nudcd1	231.76359802898492	0.041725692213261084	0.20555923163542536	0.2029862238795712	0.8391457998184013	0.9932301794244984
ENSMOCG00000001396	701.1476746425727	-0.05657123633039783	0.24236444559851852	-0.2334139241863437	0.8154400018227315	0.9932301794244984
Jarid2	1034.848305852862	0.185145981878029	0.1333691941991943	1.388221492899651	0.1650696094869801	0.9612067070935637
Fut9	218.02480729347235	0.5128070867294416	0.26556283837345995	1.9310197536309017	0.05348060961317713	0.8896038645099562
Zbtb16	197.4144220735378	0.3154115256678493	0.38784338182286193	0.8132445735838438	0.4160778482165599	0.9827898691553396
Neurod1	75.72791992704161	0.13956732217839726	0.5991583120005097	0.2329389735283828	0.8158087942400217	0.9932301794244984
ENSMOCG00000001406	509.4716394490824	0.10391625426605905	0.3259740248908025	0.3187869165368921	0.7498881001639941	0.9923968896676919
ENSMOCG00000001407	53.74736634994185	-0.11442871778749561	0.34858669237195583	-0.32826473382809357	0.7427115064120968	0.9918085388423157
Tbc1d32	117.19446776776036	-0.12055943969815669	0.234560293788738	-0.5139805964207278	0.6072655567552314	0.9862180397819569
ENSMOCG00000001409	30.849918292674037	0.23379370344295214	0.36784461742436536	0.6355773399104414	0.5250519428817552	0.9827898691553396
Otub1	2195.345059650657	-0.1083688402311825	0.1223828083796473	-0.8854907128377733	0.37589202637942026	0.9827898691553396
ENSMOCG00000001411	85.9238493257203	-0.03730304035389258	0.24804951722999094	-0.1503854583974267	0.8804605133171094	0.9947879893448605
ENSMOCG00000001415	711.5625030357031	0.5236444660604752	0.3362075370465079	1.5575036498602914	0.11935095469996186	0.9446087516488444
Spry1	58.69375572523274	0.03513875307626769	0.3079396629911766	0.1141092145615374	0.9091512177752024	0.9967138849505954
Rad21l	351.92166170136886	0.39432328397550015	0.3666834779158204	1.0753778332658475	0.28220560198380884	0.9790994683758689
Lrtm2	282.4685815212619	-0.07835888919923426	0.18514868459169095	-0.423221419974111	0.6721337201289177	0.9905110955795501
ENSMOCG00000001422	61.475667552969156	-0.28781887648122806	0.25319144708365615	-1.1367638196172194	0.25563703199453175	0.9790994683758689
March1	809.9994799248808	-0.0815686512378371	0.1606501262397286	-0.5077409719312456	0.6116350108522366	0.9867514538040189
Chgb	3134.605632188697	0.3170191457806851	0.3272014381110652	0.9688806614385238	0.33260473525828393	0.9808680905137676
Spata2l	1453.9451680187776	-0.3309936348985547	0.22105486516945133	-1.4973370282749894	0.13430558464169726	0.9564021971810307
Zscan29	153.1355937516536	-0.11028669705008114	0.2112406673466812	-0.5220902700003416	0.6016074807522684	0.9858063125051496
Ube4b	2669.673432490132	-0.14739866147360944	0.15504469742195498	-0.950684956819021	0.34176432688932257	0.9826737213166676
ENSMOCG00000001430	67.30445282897095	-0.16548565515511562	0.33378078345457957	-0.49579143964599953	0.6200415651179572	0.9870832312028577
Aqr	814.8364746195858	-0.2200475735538937	0.15952365548582617	-1.3794040318581162	0.16777021684575333	0.9616795126262409
ENSMOCG00000001432	546.4194657104385	0.11602784946239508	0.22790698864273595	0.5091017618783023	0.6106808969101074	0.9867514538040189
5330417C22Rik	475.6969016186411	0.06630183134485325	0.24099467932307359	0.27511740728503836	0.7832260383493214	0.9932301794244984
Abraxas2	474.5021615202023	-0.08513077051783603	0.1253651251599121	-0.6790626213569818	0.4970981848855621	0.9827898691553396
Wdr54	387.31726163348463	-0.2840698393845544	0.18429406625604408	-1.5413943875430556	0.12322082916520555	0.9488269863812795
Matk	860.632738421739	-0.09251235979552923	0.13603588603774186	-0.6800584940495963	0.4964674240412645	0.9827898691553396
Slc2a12	430.9905319741094	0.08243308640748041	0.2590372563145001	0.3182286887234378	0.7503114725650233	0.9923968896676919
ENSMOCG00000001441	39.38029953533169	-0.5320111562684334	0.33769465171396584	-1.575420734584383	0.11515936148251191	0.9402330488920683
Kif1bp	1756.4912599627528	-0.11468450828742685	0.15345247680631738	-0.7473617283621811	0.4548452406829189	0.9827898691553396
Pan3	749.258885626371	0.14170965594219934	0.1810285582280617	0.7828027650956155	0.43374294357502724	0.9827898691553396
Prelid3b	680.0436119202684	0.1756915549049799	0.1549572380823781	1.1338067009917863	0.2568756395361894	0.9790994683758689
ENSMOCG00000001446	4155.113346415609	-0.22483156359811488	0.11502927362029784	-1.9545595353428498	0.050635081357532634	0.8896038645099562
Gabra5	1520.4074591468573	-0.34016640511002716	0.1795857987816967	-1.8941720749508215	0.05820217342221508	0.8906097992566931
Kcnc3	338.9266125658724	0.34190268009167046	0.20792213911624008	1.6443784271598312	0.10009805838384055	0.9347323746186648
1700123O20Rik	106.84663275469634	0.22212384215638556	0.22008583085931638	1.0092600749857992	0.31284992220503716	0.9790994683758689
Vasp	144.43637249924376	0.09545596248950426	0.22574520283704982	0.4228482434614899	0.6724059865129389	0.9905110955795501
Lrch3	529.1666099177403	0.31377379402844696	0.2136593700952332	1.468570247532745	0.1419493896779463	0.9564021971810307
Rab6b	15421.79785304231	0.07692377036104556	0.21210640331073458	0.3626659504869012	0.7168544379940722	0.9905110955795501
Rnf220	958.0376095791501	0.03351097387147572	0.09857547429407143	0.33995244873491975	0.7338923378541966	0.9909445947637578
ENSMOCG00000001459	1097.536883231653	0.06312384245941753	0.305114885673948	0.20688548944436935	0.8360992891076354	0.9932301794244984
Crmp1	2888.5851414794292	-0.1834212035634951	0.20649278036266933	-0.8882693295201268	0.3743958934976913	0.9827898691553396
Psmc3	1438.3874124858228	-0.20926965253031823	0.11085832533986234	-1.8877215751613852	0.059063338366274934	0.8906097992566931
Atp6v1d	3499.0277764532875	-0.15426954594051662	0.1476381884779807	-1.0449162749211391	0.29606166715643123	0.9790994683758689
ENSMOCG00000001467	1529.5600603510484	-0.17477058694072573	0.17483839941838855	-0.9996121419671627	0.31749824484193406	0.9808680905137676
Supt3	107.2357774100122	-0.22869679979136512	0.22483757928536474	-1.0171644816594572	0.30907518952531915	0.9790994683758689
Dlc1	823.9875432535732	-0.006289351774861569	0.20808503508847837	-0.030224911523249708	0.9758876810823602	0.9989505229715451
Uqcrh	1131.4195615068081	-0.11519941503294115	0.15529855104957443	-0.7417932379560139	0.45821261818590403	0.9827898691553396
Hao1	149.09195571259932	0.5404608817087386	0.4546709895496905	1.1886856521108045	0.23456338870826926	0.9790994683758689
Tshz1	741.9127644038136	-0.09755302442340727	0.20117337551571157	-0.48492015493267104	0.6277329848430919	0.9895860424483812
Sh2b2	114.75209134870856	-0.007043597896137147	0.1903287231461345	-0.03700754032132643	0.9704789935533719	0.9983627149610678
Qser1	482.6513588392502	0.25154710255179524	0.2310464941786541	1.0887293635249418	0.2762732490104147	0.9790994683758689
Igf1r	209.3925932374903	0.26183868091665796	0.20544114574309333	1.2745191814890404	0.20247947915209227	0.9683245753771983
Basp1	9341.496333134139	0.06486313938152001	0.27728358713790724	0.233923471818259	0.815044390807877	0.9932301794244984
Oscp1	221.3336110926134	0.09996688068441413	0.18271210801505802	0.5471278382720836	0.5842909080932126	0.9852153260815123
ENSMOCG00000001485	2906.066451855104	-0.12046580421164965	0.167477238645876	-0.7192965753774448	0.47195820552992096	0.9827898691553396
ENSMOCG00000001486	4285.742357297953	0.08486539785972981	0.20800854203201338	0.4079899653672332	0.6832810419795352	0.9905110955795501
Pls1	130.71576845263027	0.08946490411940261	0.21847898551179884	0.4094897452486162	0.6821802908561378	0.9905110955795501
Larp1b	63.11258141547444	-0.030929996664724256	0.33906625023200165	-0.09122110101952291	0.9273169086648022	0.9969498598140254
ENSMOCG00000001491	1670.334279724297	0.09014486659498046	0.10957772412010167	0.8226568613177072	0.41070315348130493	0.9827898691553396
Psph	184.7194815897941	0.011573264339042192	0.2700701514729868	0.0428528079683022	0.9658188679502974	0.9983627149610678
Haus2	303.42541290678935	0.16342366556224505	0.1630498232876171	1.0022928100570123	0.31620219407520517	0.9808680905137676
Snx1	1212.5391717383861	0.06934283388446266	0.1464154730381631	0.47360318172375465	0.6357829061509783	0.9905110955795501
Atp13a1	396.4241171120955	0.1061729648004923	0.19378408815478274	0.5478931000551909	0.583765306893999	0.9852153260815123
Tmem121b	56.827925375716156	0.25396806753292284	0.4064732920590634	0.6248087451118917	0.5320965903778365	0.9827898691553396
Sgta	1688.2082415663099	0.04314552695820305	0.1064939202638738	0.40514544728277235	0.6853706016899606	0.9905110955795501
Nsdhl	579.6093119350207	-0.06782721130479347	0.18093764570755655	-0.3748651146617676	0.7077607847915931	0.9905110955795501
ENSMOCG00000001505	1042.8657966752896	-0.06645703703333712	0.1379901962083056	-0.48160694643129354	0.6300851906349036	0.9900085491220915
Cdkl4	185.94941852522783	-0.4951771130330685	0.2562935947882975	-1.9320697945732608	0.05335089190669611	0.8896038645099562
ENSMOCG00000001510	149.3509112399183	-0.3357006739394369	0.205733909525317	-1.631722620320529	0.10273793259796689	0.938964315409301
Rbm3	496.7249609450234	0.1435106177278286	0.3664290019743253	0.39164644980225666	0.6953194621294919	0.9905110955795501
H13	752.1423526959417	0.05702813326593663	0.17202863285807476	0.3315037288762585	0.7402640248399925	0.9914566743662293
C2cd4c	130.83649279953556	-0.07018738856595384	0.29323448971083965	-0.2393558432883051	0.8108296668610884	0.9932301794244984
ENSMOCG00000001515	2627.44881181816	-0.14158970630842277	0.3287586603057977	-0.43067977639500626	0.6667012256521454	0.9905110955795501
Suds3	672.5064176755955	-0.13413786306835332	0.14794338195793713	-0.9066837684330553	0.3645740493369209	0.9827898691553396
Cbx1	857.3612309580723	-0.08036962294066682	0.1453854251769157	-0.552803851162296	0.5803977311231934	0.9852153260815123
Mgrn1	1893.5827162647538	-0.17582152576880716	0.12673131878328908	-1.3873565544556707	0.16533306587145585	0.9612067070935637
Cdkl2	1369.2527684306283	-0.029686494157529445	0.24661535082404268	-0.12037569461241863	0.9041855442710568	0.9961191772170136
Moap1	2624.140314047143	-0.07776917505074202	0.1777766114321455	-0.43745447966548334	0.6617817815950903	0.9905110955795501
Atxn1	440.63690843025546	0.12132987234008537	0.22754408489205588	0.5332147939492374	0.5938849018316772	0.9857501336742809
ENSMOCG00000001528	354.0193275695742	0.10419863725832086	0.2384422311112847	0.43699740927893654	0.6621132268905568	0.9905110955795501
ENSMOCG00000001529	79.25614710954574	0.03762214141482674	0.3733721888543904	0.1007631059245787	0.9197385149384009	0.9969498598140254
Fbrs	994.1604240673942	0.08515055830109226	0.12465565106271767	0.6830862265381831	0.49455235823154003	0.9827898691553396
Syp	7826.369526268233	0.1829674665031045	0.29695052893932855	0.6161547081820067	0.5377924176591762	0.9827898691553396
ENSMOCG00000001535	5156.298282268184	-0.19848159274899163	0.09990636714302693	-1.9866761090896583	0.046958300988953074	0.8884715669173523
ENSMOCG00000001536	2391.904125209875	0.24069888212488705	0.22353495538539433	1.0767840837684672	0.28157673751090706	0.9790994683758689
Spata13	1126.5354365153987	-0.5970254392837304	0.2687227817779866	-2.2217150155024106	0.02630257114126378	0.8838432118634834
ENSMOCG00000001541	75.82757181332266	-0.030650470234877904	0.35013080915427985	-0.08754005484096727	0.9302422484588807	0.9969498598140254
Mlec	1744.8946011818416	0.05353411480536624	0.1956675937773369	0.2735972460840207	0.784394150582102	0.9932301794244984
Ube2a	507.9301271904272	-0.03618517038452937	0.13417057885213693	-0.2696952692170117	0.7873947003529123	0.9932301794244984
Phtf2	235.04995487229849	0.6841925153055368	0.2475936917720163	2.763368123027705	0.0057208204982087665	0.762152403329134
Lrp6	360.87879987450987	0.21685943216569567	0.16584123556970598	1.3076327574425592	0.1909979006579781	0.9672440546260765
Fam76b	295.0142939831956	0.12768514879059015	0.3268702323074232	0.3906294797456551	0.6960711319130173	0.9905110955795501
ENSMOCG00000001552	79.89079906242787	-0.3187922177966126	0.21916166750293622	-1.4545984315087472	0.1457804655017804	0.9564021971810307
Dynlrb1	920.0786041719448	0.010899459545505039	0.25089713948791215	0.043441944247555514	0.9653492425690429	0.9983627149610678
Olig2	554.8318926358197	0.6247302401357047	0.2791862242420766	2.237682900836876	0.025241741103344505	0.8838432118634834
ENSMOCG00000001558	2043.3051439233413	0.14165932470169343	0.2512758490811246	0.5637602070382761	0.5729173366645262	0.9852153260815123
Pcf11	854.6342167338581	0.04218870764895285	0.18946584710350536	0.22267183396860502	0.8237909242414887	0.9932301794244984
Ccng2	546.8212007551392	-0.12328625212535485	0.1544908888406353	-0.7980163299631895	0.42486101373768276	0.9827898691553396
Lrrc36	49.422445863598604	-0.2148095942883807	0.36259479915916065	-0.5924232636168899	0.553567192021795	0.9852153260815123
Ednrb	171.6404405223719	0.16198309719134227	0.35615722724100757	0.45480783429878324	0.6492474935704546	0.9905110955795501
Fbxo45	1098.2379336755287	0.039186568525270256	0.19363534527423612	0.20237301443996325	0.83962512328217	0.9932301794244984
Atp1a2	6186.370241404392	0.5766785084047555	0.3069580395781129	1.8786884005297595	0.060287052569298685	0.8906097992566931
Enpp2	1377.5341896741986	0.7879727120463519	0.5783979534331334	1.3623366185327395	0.17309167623485777	0.9616795126262409
Pcdhga10	59.710184266020576	-0.24982702411360516	0.4410039540966073	-0.5664961091457187	0.5710565771654406	0.9852153260815123
Kat6a	1098.3521725284165	0.1406365651267956	0.14718936070574593	0.9554805079149004	0.33933475796243134	0.9808680905137676
Mtch2	788.6907930998866	-0.16548288340322553	0.12142725941401124	-1.3628149412398811	0.17294084102705773	0.9616795126262409
Rimbp3	86.42248472757555	-0.23517743902510566	0.2275868256031204	-1.033352604667997	0.3014389177892869	0.9790994683758689
Gmppb	105.56722265286813	0.05628345960669346	0.19062946549849946	0.2952505766068808	0.7678024685313344	0.9932301794244984
Ttc30b	189.4397264155704	-0.0635264774960354	0.1481968801780568	-0.4286627182684892	0.6681686957490236	0.9905110955795501
Epsti1	33.28843983525853	0.38786308006708947	0.40445497060868757	0.9589771624845456	0.3375702502105183	0.9808680905137676
Tatdn1	190.62026857268944	0.04521898674183562	0.24713675406434904	0.18297151677431833	0.8548203676289463	0.9937217263181438
Akap8	526.1495041176718	0.20005425030858706	0.22255906328917396	0.8988816152980205	0.36871572154943305	0.9827898691553396
Zbed4	164.45755483883949	-0.014317832734344112	0.16465776082399794	-0.08695510410619751	0.9307071986075892	0.9969498598140254
Plcb4	1145.486339563786	0.4616719391707284	0.4146126207881357	1.1135018955600962	0.2654929346707547	0.9790994683758689
ENSMOCG00000001594	583.081170162464	0.200666943172855	0.18604690616782216	1.0785825322558438	0.28077387166517304	0.9790994683758689
Lekr1	80.07715856116575	-0.45236104641708885	0.34298927750790886	-1.3188780993500826	0.18720986895113811	0.9672440546260765
Fosb	333.92103250376687	-0.6361410461434046	0.4360100891454767	-1.4590053349227736	0.14456363934128263	0.9564021971810307
Alg1	73.31916771699366	0.16768884739773576	0.2536441320997901	0.6611185758942086	0.5085362733639521	0.9827898691553396
Ppp2r1b	1169.734326284776	-0.10965404720294505	0.16860243159887836	-0.650370496813609	0.5154529299715361	0.9827898691553396
Zfp664	870.0950617525062	-0.05600969586359968	0.13176651964435923	-0.4250677335545562	0.6707872987911874	0.9905110955795501
Trim26	301.0123384005772	0.10929168569409006	0.11985939925910281	0.9118324167288017	0.36185694282987363	0.9827898691553396
Zfp397	167.66576194842156	0.2302049100128	0.1818279038588136	1.2660593073302455	0.20549184990310526	0.970731939942315
Smarca2	4441.926398130561	-0.18530015261303703	0.17344623918684415	-1.0683434445264812	0.2853656181327136	0.9790994683758689
ENSMOCG00000001614	183.79640948874925	0.33383560957013103	0.3771156557573106	0.8852340242935126	0.3760304251063769	0.9827898691553396
Krtcap2	240.02575719492998	-0.0078077980334128666	0.19810079964977398	-0.039413258539170035	0.9685609093378167	0.9983627149610678
Zmpste24	352.95051356165044	0.3143927542802002	0.21367236413456897	1.4713777121041185	0.14118899748375457	0.9564021971810307
ENSMOCG00000001623	1906.8854992907084	-0.12882800790198892	0.17574879386872175	-0.733023567707776	0.4635440552230226	0.9827898691553396
Myo10	825.2951220261282	0.03895086040234393	0.2295207527368772	0.16970517889071773	0.8652420009891569	0.9937217263181438
ENSMOCG00000001626	50.54253060675063	-0.16949345111086725	0.30468572309520137	-0.556289442738043	0.5780130030940629	0.9852153260815123
Arnt	398.89128525021584	0.12002796962727022	0.16117212626506439	0.7447191546624613	0.45644151709837094	0.9827898691553396
Trip13	71.36136573387368	-0.37843589566293595	0.2529505765036266	-1.4960863141480534	0.1346311638526063	0.9564021971810307
ENSMOCG00000001630	396.34344943627394	-0.034878245245615225	0.16875501814084684	-0.20667975168895442	0.8362599717807175	0.9932301794244984
Apoe	5381.341928107059	0.2857838430631645	0.379943902395353	0.7521737847651793	0.45194655651193527	0.9827898691553396
Ptpn1	296.8541472018918	-0.057177494032597635	0.1254215740983931	-0.45588244641023196	0.6484745128866372	0.9905110955795501
Ccne2	53.39265609879577	-0.21452494818350998	0.2929316555221959	-0.7323378820260519	0.46396236299107463	0.9827898691553396
ENSMOCG00000001639	349.9719112165267	-0.20773059426794485	0.23721142883517712	-0.8757191644938972	0.3811827242403836	0.9827898691553396
Kif26a	206.97744555796174	0.3722280368886731	0.2700497672524437	1.378368293651269	0.16808960746247387	0.9616795126262409
Phtf1	548.1101715734417	0.15870138995948105	0.12447581873490106	1.2749575907387358	0.20232425309147306	0.9681356118033208
Nlrx1	251.69803830732747	-0.007772671882640647	0.18388265396596376	-0.04226973950506147	0.9662836680938195	0.9983627149610678
Dpysl5	1206.8306134546747	-0.3435127375932688	0.21176714092553717	-1.6221248305659317	0.10477662251144967	0.9402330488920683
Pex6	524.1114293923889	-0.2672271635387938	0.23113143585920215	-1.156169702945903	0.2476117496838791	0.9790994683758689
Rbm15b	341.5319754244384	-0.1706259161315492	0.1813117528999882	-0.9410637391259832	0.34667219638332886	0.9827898691553396
Klc4	727.6767366632919	0.02416614478154692	0.10743430642700671	0.2249388075862522	0.8220268787130209	0.9932301794244984
ENSMOCG00000001649	62.16444832589992	-0.029165625176734523	0.24732970488131026	-0.11792204737692409	0.9061294238487254	0.9961191772170136
Cdh12	254.33487507510378	0.7165881298755127	0.48228529492028316	1.4858179119766806	0.13732729098550497	0.9564021971810307
Zmym5	339.3645929651831	-0.11417503109495496	0.20257895927457806	-0.5636075508720562	0.573021246858006	0.9852153260815123
Gnaz	1320.8769419654302	-0.14313401352583222	0.16673129666891753	-0.8584711831879829	0.3906323360474153	0.9827898691553396
Pcdha3	40.40852065427856	-0.11232238452053257	0.3284278417814179	-0.3420001907002991	0.732350748745099	0.9908467069143866
Gpatch8	1981.8037649522203	0.15974923261326057	0.18037323114543563	0.8856593165116289	0.37580113747506005	0.9827898691553396
Elovl6	424.88347075308246	0.40047079702914196	0.1970411131271352	2.0324225268193117	0.042110899487121704	0.8854355124960115
Pcdhb13	38.173275646676046	0.3567169205053377	0.4315482097767067	0.8265980773965242	0.40846490745812347	0.9827898691553396
Adgrd1	53.71951732121154	0.28387912521531944	0.5319452225248968	0.5336623268611702	0.5935751782047629	0.9857501336742809
Notch1	355.11800164456787	0.2754105376048531	0.3193568848632822	0.862391107436927	0.3884723323519333	0.9827898691553396
ENSMOCG00000001664	32.4567479827039	-0.05134381061717916	0.31110201128491605	-0.16503850426783978	0.868913675560746	0.9937217263181438
Lrig2	331.47102124129236	0.2253757141614197	0.17043243828170415	1.3223756958103303	0.1860430778500055	0.9672440546260765
Sema5b	271.59746257282137	0.057076601720517976	0.24589508520853146	0.23211770040915675	0.8164465973481023	0.9932301794244984
Grk5	442.2219806150841	0.03933696893222125	0.15509818947582538	0.2536262290692476	0.7997843311878952	0.9932301794244984
Plbd2	317.99329495531236	0.3219618293164252	0.1718218397368751	1.8738120241843053	0.06095633851115357	0.8911089989335398
Abcc1	663.4958260864582	0.2271985662965418	0.29926281816824063	0.7591941013160363	0.4477364541333231	0.9827898691553396
Ddx50	1258.914105350003	-0.11775212171285158	0.10225385400527344	-1.151566587473357	0.24949921805044906	0.9790994683758689
Mid1	88.74851698952418	0.16651024872316736	0.27493752733724525	0.6056293963789153	0.5447608773452961	0.9835123935726917
Ptprm	349.3471846833505	-0.5534000500969841	0.2527107171999574	-2.1898558803863715	0.028534690564002176	0.8841458178596813
N6amt1	89.08867146479008	-0.20876050417451475	0.23827032770638232	-0.8761498176632713	0.3809485931710398	0.9827898691553396
Rnpepl1	282.8429312854596	0.27554516476778435	0.20088710410051858	1.371641878166101	0.17017495018622997	0.9616795126262409
Lsm8	65.11747697867852	-0.3059038721994204	0.29521567680161603	-1.0362047013004219	0.3001066539562969	0.9790994683758689
Gpr153	185.53151975360197	0.1183542563342093	0.3046464480682585	0.38849708271567	0.697648212526246	0.9905110955795501
Cdk5r1	835.5902222932842	-0.20546258325559225	0.25955566497796995	-0.7915935230041351	0.42859772477198005	0.9827898691553396
Fam98a	424.6012997104387	0.22975019078755451	0.19862738084044443	1.1566894242647783	0.24739927205094625	0.9790994683758689
H2-Ke6	151.40303326270646	-0.15623935008834738	0.2980391081012784	-0.5242243243972358	0.6001225244082431	0.9858063125051496
Copa	2152.1599534286433	0.009682508137644322	0.17975470751143482	0.0538651158108245	0.9570426298477501	0.9983454252037803
Rfc3	111.98520378028617	0.178387724528007	0.21262887817097553	0.8389628260398613	0.4014901704134569	0.9827898691553396
Zbtb39	159.56722194842624	-0.25030991340468217	0.22339035605533122	-1.1205045635125057	0.26249880900228656	0.9790994683758689
Fam222a	276.1325236762551	-0.20503527027468973	0.32186868623604037	-0.6370152768583658	0.5241148927433517	0.9827898691553396
Prpf6	896.4108041890156	-0.21745652759283193	0.11923423938828914	-1.8237758609310164	0.06818596467167781	0.9033574391290687
Lrrn1	506.2370588207483	0.2461278019384021	0.29347621270232715	0.838663548476583	0.40165813888841745	0.9827898691553396
Htr1f	100.64674298334538	0.6366532653830781	0.3168055094497194	2.0096028837658904	0.04447323580538599	0.8854355124960115
Tmem39b	131.45292477914592	-0.0777325223069762	0.23135827436982986	-0.33598332507753553	0.7368834409530506	0.9912761673515791
Ppp1r18	72.75947175124287	0.16327531534035528	0.2517478133863761	0.6485669652660081	0.5166183137616427	0.9827898691553396
Zfpm1	73.71458441562845	0.19434047115698372	0.24355409843453243	0.7979355404245952	0.424907897590895	0.9827898691553396
Mrps5	301.1011910992159	0.23144227598837522	0.274256998444291	0.8438883138852239	0.39873181901488597	0.9827898691553396
Kif7	76.98878842811895	-0.13426414375051587	0.3337718020756995	-0.402263291612827	0.6874902671182063	0.9905110955795501
Sf3b5	324.7434357761204	-0.12087787060505575	0.16204939692718884	-0.7459322459519423	0.45570834490831225	0.9827898691553396
Usp12	1546.4614035987331	-0.08814296232815895	0.10375503978905191	-0.8495294542546132	0.39558674777072306	0.9827898691553396
ENSMOCG00000001716	169.73351128102513	-0.3538108322915762	0.25815390357857787	-1.3705422516839143	0.17051769555484086	0.9616795126262409
Kcnh1	289.6432335889715	0.1493737765706782	0.3617836386430797	0.41288151429657105	0.6796934253954473	0.9905110955795501
Plekhg5	471.87738570922056	-0.1468278559317365	0.3268022593134346	-0.4492865387167185	0.6532249671826964	0.9905110955795501
Ube2g2	780.2373467170579	-0.18558328275409794	0.10627884132256869	-1.7461921906998497	0.08077756135484372	0.9066875931076556
Tmem259	571.2006716327	0.281639882731062	0.17379796319482024	1.6205016304785775	0.10512456436306293	0.9402330488920683
Ttc17	547.2624456666017	0.11928486523698435	0.12976108463892616	0.9192653218713993	0.357956811632496	0.9827898691553396
Nfasc	2220.6558959522035	0.39976946264330043	0.19562101867680684	2.0435915595745633	0.040993913806505036	0.8842741452865222
Ankrd13d	621.0930989455247	0.062330985595062526	0.1249386990271509	0.49889254554761403	0.6178550858558816	0.9870832312028577
Grin1	4672.425909452827	-0.006405036609979632	0.1709241273349286	-0.03747298119842882	0.9701078828911566	0.9983627149610678
Igf2bp3	357.33614719026724	0.1605749054391706	0.1712843445500138	0.9374756686667526	0.3485139338055817	0.9827898691553396
Erich1	150.51648808922988	0.0666359769064889	0.1819912596345714	0.3661493251944644	0.7142536530186185	0.9905110955795501
Relt	71.91176947283027	0.41278000746577037	0.32212565082391453	1.2814254512485588	0.20004426927440633	0.9672440546260765
2310011J03Rik	192.2232328928741	-0.28202683471756307	0.17310228863676488	-1.629249601138225	0.10326019054410704	0.9393916095833892
Map3k20	1268.563467274828	-0.09093068795872909	0.15984286011669144	-0.5688755061836743	0.5694406287966909	0.9852153260815123
Ikbkb	337.2684477998834	-0.05109340869902973	0.19519149908826763	-0.26176041957608387	0.7935061559118746	0.9932301794244984
Zfp11	150.69706791356936	-0.17496109879602675	0.21903325273112512	-0.7987878398117054	0.4244134427615947	0.9827898691553396
Msantd2	331.3662867514107	0.251124101468854	0.3265752566796659	0.7689624254515365	0.441915616841061	0.9827898691553396
ENSMOCG00000001762	195.28996201110456	0.03368555511028093	0.21927945621852257	0.15361929334917562	0.8779099236228793	0.9945974584303666
Tmem150c	713.7217324290184	-0.05019135605163679	0.18510809537765346	-0.2711461967626942	0.7862785920350832	0.9932301794244984
Flcn	519.0634075635859	-0.16958412647012724	0.14176654050913762	-1.1962210960434394	0.23161029047616732	0.9790994683758689
Rcor2	425.3598126102462	0.16021976378931968	0.16187298640987105	0.9897869146840516	0.3222782819975851	0.9808680905137676
Rdh13	111.19498685923722	0.3916140981205722	0.2702842013456726	1.4488974796559715	0.14736621511333703	0.9564021971810307
Rad54l	37.841999911164194	-0.4638651584443644	0.36372656994616726	-1.2753128222472665	0.20219854110524774	0.9681356118033208
Cox15	661.262166059979	-0.12982370192579187	0.17880239224151884	-0.7260736296549736	0.4677936340279854	0.9827898691553396
ENSMOCG00000001781	1342.9683730043887	-0.01809204582755913	0.12442619758837521	-0.14540383117236252	0.8843920399735778	0.995162396455763
Grem2	175.05217143436698	-0.076577123054172	0.38415272391895805	-0.1993403099500784	0.8419965490701351	0.99354362392301
Vps26c	445.3302926162256	0.15375433964084506	0.14706026693581545	1.0455192476153417	0.2957830494882764	0.9790994683758689
Olig1	172.25259723538636	0.7192003744715494	0.33253444354914324	2.1627846029888422	0.030557750381090293	0.8841458178596813
ENSMOCG00000001794	572.5182519278799	0.07510027992925412	0.21944125150588573	0.3422341032685909	0.7321747223457713	0.9908467069143866
Tef	6700.03581473688	-0.3307535071922286	0.21470139131465277	-1.5405280104007208	0.1234317005285083	0.9488269863812795
ENSMOCG00000001801	244.22178789170627	0.012320821369598074	0.3025029883168062	0.04072958564195964	0.9675114752276294	0.9983627149610678
Pmm2	310.66240624378526	0.008966286011092504	0.18017195072507533	0.04976516030941006	0.9603095303112489	0.9983627149610678
Cacna2d2	848.8249399807451	0.17524958962283305	0.27810217181841135	0.6301626070624987	0.5285882014160967	0.9827898691553396
2810459M11Rik	60.50557588330874	0.1154679032733892	0.3256653733022151	0.3545599647348317	0.7229192734108743	0.9905110955795501
Senp2	1434.3517001439116	-0.04026532880839472	0.12829826078407222	-0.313841579475203	0.7536413628204048	0.9923968896676919
Dennd1b	85.77290275434201	-0.018004234301483898	0.24527874216633064	-0.07340315814761764	0.9414853045388126	0.9969498598140254
Ccn2	162.5335815275308	0.2654288086720219	0.33417391182042955	0.7942834532656509	0.42703043466637963	0.9827898691553396
Cmtm6	123.64202675470207	-0.0017061838168666269	0.23532153496426894	-0.007250436374748671	0.9942150394423147	0.9991581039407021
ENSMOCG00000001816	1644.9592799434536	0.12314639958469778	0.15415367790976225	0.7988547613945652	0.42437463297521943	0.9827898691553396
Timm9	644.5177260044624	-0.125931478042581	0.16448475836897594	-0.765611837177574	0.44390729906165804	0.9827898691553396
Ncapd3	519.8400072640869	0.07549288480168846	0.17132788579761327	0.44063396014159034	0.6594780132226787	0.9905110955795501
Sigmar1	243.0862235667832	0.20427258166740572	0.19874538413702525	1.0278104447777752	0.3040390021318234	0.9790994683758689
ENSMOCG00000001823	819.1496941189656	-0.028867999320084582	0.18007216638683987	-0.16031350041110146	0.8726341246281919	0.9937217263181438
Setd4	63.79798296247257	0.0615581087572912	0.47138004902430275	0.1305912477303796	0.8960986667304092	0.9954333909839311
Tmem222	156.8352859329109	-0.12963559406850322	0.20041165305459258	-0.6468465884725286	0.5177312367468068	0.9827898691553396
Fam161b	107.66366909999152	0.13489319722940904	0.2850858518287751	0.4731669297655185	0.6360940893795232	0.9905110955795501
ENSMOCG00000001829	132.52577218804117	0.13530083791859948	0.32181810626090873	0.4204264312241852	0.6741739627836865	0.9905110955795501
Zswim5	654.5250542963612	0.01795077015360411	0.1583799253012528	0.11333993319835287	0.9097610590805514	0.9967185265324758
Cpt1c	391.77636547123126	-0.035233458853008555	0.16738469898813027	-0.21049390455639594	0.8332822085584559	0.9932301794244984
Shisal1	105.570031250995	0.5650089711102066	0.32014555735299255	1.7648502630546508	0.07758893459400804	0.9066875931076556
Cwc27	239.56567255610477	0.029794142366633757	0.22233181346504802	0.1340075534053861	0.8933966015585323	0.9954333909839311
ENSMOCG00000001834	2569.811290340013	-0.05609148380508812	0.17692222135670732	-0.31704035465391034	0.7512129819143689	0.9923968896676919
Rbm4b	206.75982103060653	0.048382287406360636	0.19352995403340434	0.2499989608740856	0.8025881522279779	0.9932301794244984
Zfp580	78.83123954000163	-0.11062538541933324	0.2501689249180254	-0.44220274542724536	0.6583424995765746	0.9905110955795501
Ppp1r1c	71.90257629340798	0.22833604941377336	0.37646357837262895	0.6065289247921963	0.5441635810529697	0.9835123935726917
Abcc12	293.40306334038536	0.48797635491648156	0.602851466217598	0.8094470732204332	0.41825803481910256	0.9827898691553396
ENSMOCG00000001841	1489.8509022446733	-0.10155359224502329	0.22054904727705568	-0.46045808630245755	0.6451874496998381	0.9905110955795501
Caprin2	174.41065239578566	0.04549301479881716	0.28413757413107754	0.16010911241830497	0.8727951231087245	0.9937217263181438
Hook3	572.7436309995688	0.4726336785955435	0.21277113751484475	2.221324208329565	0.026329010354384428	0.8838432118634834
Mnt	370.95475235400625	0.05317485190797164	0.19531256078881162	0.27225515703246944	0.7854258337538829	0.9932301794244984
Pdia3	1770.376424663976	0.009641720482820994	0.24474019122599738	0.039395738127529945	0.9685748777550703	0.9983627149610678
Sstr3	151.5310129956163	0.01564764469856476	0.3010776873503801	0.05197211668613212	0.958550911038663	0.9983627149610678
Spns1	168.70267979359733	0.3180788150010249	0.286248245618784	1.1111991771807463	0.2664826253508809	0.9790994683758689
Prxl2c	127.42073113371069	0.1022106907030473	0.19696799030567788	0.5189203105764791	0.6038163135965241	0.9858063125051496
Clcn2	258.0116279189038	0.19031957007017872	0.2776465091134211	0.6854743849577142	0.4930446190686201	0.9827898691553396
ENSMOCG00000001860	323.0716353242116	-0.20563354196067007	0.15170187200201327	-1.3555109060087345	0.17525483626580537	0.9635979972442444
ENSMOCG00000001861	454.18566363120135	-0.23719972482616694	0.18914318825483145	-1.254074899628895	0.2098147826944228	0.9728716713013718
Ap3d1	4720.548550642583	-0.1397337814873114	0.130626739546519	-1.0697180529224584	0.2847462378374883	0.9790994683758689
Cct2	1761.334971105321	-0.03410149994618278	0.12109758470732788	-0.2816034690419323	0.7782475799091818	0.9932301794244984
Wdfy3	2686.8005255226594	0.17864776386558479	0.2090063833519055	0.8547478837753693	0.39269073559298406	0.9827898691553396
Filip1	605.5040765140296	-0.9662309373697422	0.31216583887043436	-3.0952487974533947	0.001966478682189231	0.6814129559311713
Emp2	36.41799910514837	0.01301079675385975	0.30490054309231246	0.042672264935653355	0.9659627887989213	0.9983627149610678
Colgalt1	217.82114700778564	0.04639027194317797	0.18950537253207883	0.24479660562301567	0.8066139222929184	0.9932301794244984
Rasd1	601.3061165223583	-0.5809489541908162	0.3659450135146597	-1.5875307293059848	0.11239249292563891	0.9402330488920683
Proser1	469.6817143061115	-0.0392931658805261	0.15833306853404147	-0.24816777849586175	0.8040045956824617	0.9932301794244984
Zbtb41	255.33913499805465	0.1841907087781292	0.1682084622163995	1.0950145215712668	0.2735102746050812	0.9790994683758689
Hmg20b	78.09388378698014	0.33168350342578073	0.24503616975268575	1.3536103823388517	0.17586071281222262	0.9635979972442444
Phyh	876.394190720503	-0.30093916773086793	0.17133611420513384	-1.7564257782253982	0.07901573443570764	0.9066875931076556
Celf3	2437.143345749683	-0.18912025530435772	0.15704814814748108	-1.2042183084308533	0.2285052113956334	0.9790994683758689
Rras2	213.18489511861654	-0.01405530966924417	0.21569311326622218	-0.06516346051297527	0.9480438535556024	0.9969498598140254
ENSMOCG00000001884	40.29029562194597	0.6984362781482877	0.34723488313328477	2.0114231376926366	0.04428078143768658	0.8854355124960115
Sh3tc2	129.9998098452765	0.6998042331823764	0.34542754102079964	2.02590746271803	0.04277426835777474	0.8854355124960115
ENSMOCG00000001887	114.3921766176515	-0.0768055126163213	0.18534630964060597	-0.41438921964645703	0.6785890826918473	0.9905110955795501
Ssr2	311.3736296554581	0.0569319762754243	0.23568624719362904	0.24155832999730184	0.8091224137759072	0.9932301794244984
ENSMOCG00000001891	124.0202563249237	-0.1550272893660232	0.22892493200916195	-0.6771970532236251	0.4982809371697361	0.9827898691553396
ENSMOCG00000001895	1105.7362762480298	0.24091020143251024	0.15862571082230686	1.5187336288905824	0.12882955820265884	0.9516499481088331
ENSMOCG00000001900	30.03610113830174	-0.11342124351155015	0.34262598215113793	-0.33103515033929387	0.7406179348390861	0.9914566743662293
Ckmt1	1963.2511971814051	0.10559245880842445	0.24731589163242157	0.4269537962621644	0.6694129811145461	0.9905110955795501
Cldn10	204.27330502248154	0.4999879908396722	0.2649479824231605	1.887117562726402	0.05914451497673347	0.8906097992566931
Cep95	189.09172707428502	0.14749103999469113	0.2526651179579853	0.5837412033235899	0.5593944414778816	0.9852153260815123
Tssc4	192.81727270286433	0.01652266753593883	0.20380608726048813	0.0810705301202359	0.935385862079692	0.9969498598140254
Scrn1	5934.654369812406	-0.14802932638044755	0.14027212745609777	-1.0553010713178042	0.2912876513068785	0.9790994683758689
ENSMOCG00000001913	170.95648951002383	-0.14939439750910574	0.26078107156107627	-0.5728728569708205	0.5667307839762027	0.9852153260815123
Grik5	2316.845404304972	0.027819394387243443	0.2115424735286569	0.13150737023728168	0.8953739566040553	0.9954333909839311
Srgap3	4305.501713568057	0.12530520883100962	0.10477047069519432	1.1959973836097044	0.2316975800861429	0.9790994683758689
Cog8	438.02893088348213	-0.15130801847670763	0.1579495803585355	-0.9579513800115711	0.3380872759982211	0.9808680905137676
ENSMOCG00000001921	205.57892923409466	-0.15164175652018652	0.26150325227183446	-0.5798847823221481	0.5619923185734446	0.9852153260815123
Prkcg	3859.740687255944	-0.3387363480147763	0.24722987836418264	-1.3701270665829468	0.170647240069144	0.9616795126262409
Bmi1	844.3594395081175	0.1420772977182976	0.24464551114985042	0.5807476174425793	0.5614105639208542	0.9852153260815123
Cdkl1	879.0546009638341	-0.13852642608086424	0.19809811446342143	-0.6992819010725262	0.4843758755689083	0.9827898691553396
Snx12	1388.7062712335426	-0.0597379696995339	0.10616509251237675	-0.5626893763839524	0.5736464195845783	0.9852153260815123
Ppp2r3c	669.0606091574833	-0.02363371814911992	0.14218563503570789	-0.16621734075446265	0.8679859133241332	0.9937217263181438
Tomm22	1033.9404782729368	-0.10447154884679241	0.10954424186395574	-0.9536927461375545	0.3402391930480368	0.9808680905137676
Rbm25	2935.9943160567136	0.04271846230487267	0.26073785322426646	0.16383682605582228	0.869859600371574	0.9937217263181438
Acss2	773.6220860397184	0.2242556890062813	0.16247350336156138	1.3802600692817741	0.16750658475765728	0.9616795126262409
ENSMOCG00000001937	126.5686218993874	-0.13225591084847121	0.25442972566073635	-0.5198131252353151	0.6031938303344728	0.9858063125051496
ENSMOCG00000001939	451.0006896049378	0.29267346090685165	0.32324972025145726	0.905409788689623	0.3652483318546151	0.9827898691553396
ENSMOCG00000001940	902.3569514663483	-0.01263058857434211	0.24922587151713754	-0.050679283404466265	0.9595810848804869	0.9983627149610678
Dennd4c	498.43505255195345	-0.10771398839277382	0.3344053744990318	-0.322106032398967	0.7473723684408611	0.9922421548386167
Rin1	558.8899743548097	-0.4087704093634293	0.25604575938823165	-1.596474045655361	0.11038299593574624	0.9402330488920683
Ddit4	718.6681524624142	-0.1165419143664414	0.24486657493440478	-0.4759404765540614	0.6341167845491631	0.9904144704458789
Cldn11	1011.5343258652517	0.6979821668902412	0.38797356280274276	1.7990456923094937	0.0720114531838396	0.9066875931076556
Slc9a2	111.07501308742292	0.24316956473609372	0.33672596363332136	0.7221586423341381	0.47019694737186996	0.9827898691553396
Slc9a1	527.6163999615377	0.1932876482630079	0.21167685618288926	0.9131260344116551	0.36117625932688596	0.9827898691553396
Ngrn	1057.29038942167	-0.1553896843046604	0.13179967318861127	-1.1789838361912384	0.23840461225303797	0.9790994683758689
Pigm	50.14986134018562	0.40147626719357077	0.2760516421260157	1.4543520339223326	0.14584873110217134	0.9564021971810307
Mtmr10	360.8304528229987	0.4456260191302779	0.20065598029815104	2.220845939742889	0.02636139782709468	0.8838432118634834
ENSMOCG00000001957	96.28084700818225	-0.48510554423514857	0.3094129389494457	-1.5678256568139475	0.11692182546779026	0.9435113400847259
Prpsap2	1054.277415117692	-0.2988122391350535	0.1495970436921163	-1.9974474880000639	0.0457765935110378	0.8854355124960115
Abcc4	63.87254065756749	0.2930268758759964	0.268939563852703	1.0895640331910625	0.2759052337430804	0.9790994683758689
Incenp	231.46403724697768	0.05844079540314135	0.2626335220696367	0.22251841631871314	0.8239103384617861	0.9932301794244984
Nifk	380.2534793782298	-0.1789551038708945	0.20415463299631534	-0.8765664596704222	0.38072216354176697	0.9827898691553396
Rasl10b	2011.0171605923783	-8.614522814397849e-4	0.2568693965978979	-0.003353658679660847	0.9973241725331474	0.9995554716927965
Hecw1	1271.1717501406383	0.24882564791145637	0.3330895682068532	0.7470232383769287	0.4550495336032438	0.9827898691553396
Champ1	254.33706588557254	-0.21549837780694742	0.18866532132477837	-1.1422256951820904	0.25336021797003283	0.9790994683758689
Srrt	1711.5552302884194	-0.022612824377564764	0.09118136717811709	-0.24799830357217642	0.8041357193653056	0.9932301794244984
ENSMOCG00000001972	458.5435209010234	0.22497127634340536	0.24877598950438423	0.9043126581130155	0.36582963663907	0.9827898691553396
Edil3	1219.2949755409725	0.40875143436865136	0.21812099675247842	1.8739664702362353	0.06093504668923805	0.8911089989335398
Emc9	335.242088848357	-0.16500043349750695	0.15936928249860702	-1.0353339797394718	0.30051296615831363	0.9790994683758689
ENSMOCG00000001976	125.18175312154898	0.5592892622966503	0.19537726416495704	2.8626118022844373	0.004201649960809671	0.7243824912673226
Ecsit	822.1713160587514	-0.02587647784915702	0.10667640051442685	-0.24256984416771263	0.8083386444405873	0.9932301794244984
Ppl	175.1004122247841	-0.17588083878450472	0.37742990860144104	-0.4659960293984853	0.6412183426709748	0.9905110955795501
Abtb1	285.8878611940487	0.0757195886066912	0.16276399895836371	0.46521091329330666	0.6417804242189391	0.9905110955795501
Cdc25a	106.56825609831033	-0.11711588874089167	0.23709579533836056	-0.49396020951681163	0.621334281133876	0.987131271738163
Prkcq	151.21263034206476	0.24290081220389076	0.342883622543549	0.7084059903533024	0.47869317349578655	0.9827898691553396
ENSMOCG00000001987	41.50750098862678	-0.6233360117491501	0.29155235248603606	-2.137989991965525	0.03251755551111686	0.8841458178596813
Rims2	1858.1982899130087	-0.3224763709845669	0.16258314460245055	-1.983455122442664	0.0473166151594343	0.8896038645099562
Ptprd	2665.585139561332	0.6554672869647611	0.26285656200806046	2.4936310585415833	0.012644389554484698	0.8666807996061601
Cdk7	369.6699483696934	0.0435266072238888	0.14295269284892712	0.3044825973994618	0.7607602490168792	0.9932301794244984
Srsf1	2489.386217814389	0.08006116950127588	0.19164513152310225	0.4177573876517951	0.6761245092725983	0.9905110955795501
Lhfpl2	263.5516114518324	-0.3406602326064767	0.26437637832111643	-1.288542625365359	0.19755714089093138	0.9672440546260765
Mta2	699.931481552238	-0.04893412593702893	0.11367374168554539	-0.43047871224644774	0.6668474487331062	0.9905110955795501
ENSMOCG00000002001	231.686015344775	-0.4963432940558023	0.2049763556583456	-2.421466087938	0.015458043268362214	0.8796473849899012
Kcnf1	281.5061178733117	-0.12964332290170297	0.34960763606141526	-0.3708252038262935	0.7107677277275831	0.9905110955795501
Pa2g4	1196.9120204821581	-0.03408532600854649	0.12694367535797532	-0.2685074771344649	0.7883087202022507	0.9932301794244984
Uba6	396.1614576860257	0.06260102954761247	0.22102599849601612	0.2832292579768204	0.7770011015766609	0.9932301794244984
Ttc5	362.6438500560474	-0.011196765761220008	0.13785960003797998	-0.0812186148671208	0.9352680958977638	0.9969498598140254
Rrp36	181.29069899512862	0.05026243080091327	0.17404453402175643	0.288790630992354	0.7727416021712249	0.9932301794244984
Spint2	277.36716851603944	-0.23267417313802052	0.286731049876532	-0.8114718417772032	0.4170947570032016	0.9827898691553396
Efs	142.8716328663081	0.09371968541063636	0.2805124753692688	0.33410166619956216	0.7383028428011261	0.9912761673515791
Usp37	354.18782514212296	0.10441160179502935	0.16680418676651146	0.6259531239535506	0.5313456883182641	0.9827898691553396
Tnik	3567.6898686887853	0.006816351577291658	0.135191234889134	0.050420070375727606	0.959787642879128	0.9983627149610678
ENSMOCG00000002022	160.88322612692903	0.10589964966735832	0.22175268416763275	0.4775574648165433	0.6329652112491171	0.9902831134386583
Chst12	133.6390336514274	-0.01785312551608826	0.2620300901705799	-0.06813387540517195	0.9456790643284085	0.9969498598140254
Rsph9	100.63502453764512	-0.11816326572003034	0.30070834229247845	-0.3929497426616153	0.694356601189025	0.9905110955795501
Stx4a	746.741664802969	0.11760425487917155	0.16066817961594956	0.7319697973816898	0.46418700250247763	0.9827898691553396
Atp7a	181.80792973519098	0.4199300562864583	0.19239950141049825	2.182594306159386	0.029065699469455596	0.8841458178596813
Kbtbd2	1169.833597745031	-0.1183642471072511	0.11276466070013585	-1.0496572806795001	0.2938757112054253	0.9790994683758689
Pbx2	939.1188049093245	-0.15245930466094543	0.11273931937177663	-1.352317057708904	0.1762739099068777	0.9635979972442444
Osbpl11	182.1608936475079	-0.10832024286697389	0.16556419341512293	-0.6542492107298832	0.5129512616238386	0.9827898691553396
Klhdc3	3379.4357813684687	-0.048014152906966756	0.11473657263317764	-0.41847295770697274	0.6756013541686621	0.9905110955795501
ENSMOCG00000002036	775.2547669354287	-0.2035137412058492	0.10219618725192747	-1.991402484558061	0.04643665632336954	0.8854355124960115
Tctn2	376.27863837967647	0.0570788355152683	0.1465073507361005	0.3895970763820771	0.6968345143629497	0.9905110955795501
Bms1	747.1485090484957	-0.15961149375411052	0.16460821929934577	-0.9696447384796227	0.33222360462787287	0.9808680905137676
Zfp810	99.6527818726136	-0.2840675214452106	0.20545760210558991	-1.3826089593862827	0.1667848004170194	0.9612067070935637
Kctd5	332.1299841142793	-0.09644267721641771	0.12834987814460105	-0.7514045093814878	0.4524092497063735	0.9827898691553396
ENSMOCG00000002043	232.64588307578308	0.31156779111901783	0.2619350612352551	1.1894848656369277	0.23424892303169195	0.9790994683758689
ENSMOCG00000002044	4848.981709027069	-0.1597812813961643	0.1306671399370151	-1.2228115000694357	0.22140090086890998	0.9790994683758689
Elavl3	1932.4279726324569	-0.12284016322141612	0.1002832214595167	-1.224932360903518	0.22060070636451626	0.9790994683758689
Plcb1	2436.3970352976303	-0.1745698523704803	0.30273279510855955	-0.57664665074651	0.564178178316791	0.9852153260815123
Kcns1	176.34632703977806	7.997038155158132e-4	0.3146583811731061	0.0025414985373482368	0.9979721797387682	0.9995554716927965
Flot2	956.7098452516691	-0.16086626536574647	0.13047413151682807	-1.2329360885226397	0.21759960983845883	0.9772502793407158
Zc3h6	1047.8445815325713	-0.06013245701751563	0.1386119231378067	-0.43381879174804094	0.6644200344568272	0.9905110955795501
Tmem69	275.5587197877129	0.10464768968465908	0.13909934661551737	0.7523233734081753	0.451856615068378	0.9827898691553396
Tubgcp3	618.8258899061352	-0.16519241490919978	0.11002263609386771	-1.501440256060244	0.13324172836711742	0.9564021971810307
Pdia4	689.3975059067013	0.12237416043954949	0.19198961781778148	0.6373998856318135	0.5238644028590533	0.9827898691553396
Lhfpl4	452.5351418237321	0.03688667672512963	0.2879419844843765	0.1281045443622379	0.8980662398014537	0.9959426155422841
Hist3h2ba	97.1320320319533	-0.5516216451590519	0.2828595074763077	-1.9501612305015261	0.051156905095250844	0.8896038645099562
Cpped1	379.2543638236633	-0.10852284711858524	0.19648214749689652	-0.5523293006571978	0.5807227592691032	0.9852153260815123
Tbl1x	2080.7792936200244	-0.032423150956239745	0.11788643988962408	-0.27503715428676295	0.7832876936382116	0.9932301794244984
Ddx6	3756.796364045381	-0.09586151554619855	0.14263420072222052	-0.6720794526194207	0.5015331165945394	0.9827898691553396
Def8	949.2957389135713	-0.012452704055317983	0.16938377707192978	-0.07351769024509279	0.9413941673864358	0.9969498598140254
Fam20b	552.3572502680822	-0.07791335711610536	0.1435794089833425	-0.5426499361419196	0.5873708501142334	0.9852153260815123
B4galt4	261.36243135157093	-0.2892536302832508	0.206243780416221	-1.4024841364889038	0.16077072435247325	0.9596086924017089
Eloa	431.9171943858386	0.017823425083942763	0.13509532116558554	0.13193221593586277	0.8950379067148029	0.9954333909839311
Rnh1	219.15317090618782	0.07499328430563963	0.20224018158360219	0.370812979490126	0.7107768332763349	0.9905110955795501
Tafa2	94.86731191383957	0.07545905886031841	0.35154908227627507	0.21464729298032048	0.8300423187479656	0.9932301794244984
Gpam	660.4874658311167	0.21293335306865882	0.19255436373482673	1.105834990901046	0.2687979468431658	0.9790994683758689
Ppp6c	336.94678390905125	0.060882128412896495	0.19631739913086813	0.31012089953530586	0.7564690196998356	0.9923968896676919
Lars	786.0306587228874	-0.14026296991567744	0.1628466559256838	-0.861319313671921	0.38906220128967206	0.9827898691553396
Ppm1e	906.4182930468463	0.20942563388463137	0.36320265170001836	0.5766082183166528	0.5642041462043011	0.9852153260815123
Kat2b	409.7876340995456	0.42134893567331233	0.17368737068985543	2.4259042784733804	0.015270297312681157	0.8796473849899012
Fhit	40.74784634848613	-0.5884138518300104	0.3279783217696398	-1.7940632437386856	0.07280307494487825	0.9066875931076556
Sugt1	949.8882089299508	-0.030042908588204142	0.11034746348714006	-0.27225735543713114	0.7854241434998105	0.9932301794244984
Fam102b	1501.6316253739549	0.04918501627247299	0.20205682783228698	0.24342169873763422	0.8076787360877031	0.9932301794244984
Mdm4	549.827198521672	0.6001117138149092	0.26854950774031605	2.234640900534473	0.025440933413147713	0.8838432118634834
Ctxn1	985.5801722756424	-0.2586930339996237	0.26144612058602534	-0.989469774574468	0.3224333509976108	0.9808680905137676
ENSMOCG00000002104	28.84173658504295	0.9510214574981691	0.3859185019272252	2.4643064604285505	0.013727867974264344	0.8703434731000946
Tert	117.42985427706928	0.27895398279838857	0.3048573572841613	0.9150311650126001	0.360175269494912	0.9827898691553396
Ablim2	1162.9222671480713	-0.3809553825492977	0.18479443259700615	-2.0615089816048364	0.03925450749495084	0.8842741452865222
ENSMOCG00000002108	559.093682666865	-0.09078781229807376	0.17134905363577466	-0.5298413406534208	0.5962219395628099	0.9858063125051496
Ptpn5	4997.185352614687	-0.3523059021028535	0.2819321256410179	-1.2496124778324909	0.2114411427609295	0.9728716713013718
Hlf	4644.982189604838	-0.3886408002712425	0.2999341679985079	-1.2957536744302365	0.19506036284346398	0.9672440546260765
ENSMOCG00000002113	29.236365396209145	0.435574297441219	0.368752247307083	1.1812112349744925	0.2375188191985839	0.9790994683758689
Adamts10	246.29124903934007	0.26979001043865863	0.42089133745164486	0.6409968237221183	0.5215247466173976	0.9827898691553396
ENSMOCG00000002115	29.0898528985197	-0.5936504398842478	0.4823955937860274	-1.2306298969794671	0.21846131817067432	0.9772502793407158
Chsy3	106.25490907771646	-0.14577116688880876	0.3133937210267896	-0.46513748396493215	0.641833004362761	0.9905110955795501
Irak2	121.47951637417933	-0.05520914439077312	0.18762939247526447	-0.2942457131179564	0.7685701518893179	0.9932301794244984
Senp6	1613.8625280155588	0.10222411839015463	0.14202837154922893	0.7197443530127527	0.4716824125384056	0.9827898691553396
Rpp25	82.76649901428569	-0.1473502508108508	0.20312785175731363	-0.7254064350904328	0.46820272642725885	0.9827898691553396
Prpf31	406.2229625902466	-0.1093944704811915	0.1484186529887924	-0.7370668597123857	0.4610816913466615	0.9827898691553396
Naa38	376.8992127058533	-0.02861388610257019	0.17372107992989252	-0.16471165223079265	0.8691709451009111	0.9937217263181438
Zbtb8os	366.16947021747256	-0.19022983004680274	0.17157440415600336	-1.1087308213749472	0.26754632154655306	0.9790994683758689
Arl4d	365.7822264919852	-0.5721895526506608	0.24604251637216065	-2.3255718608615372	0.020041402183011703	0.8838432118634834
Plaat1	268.2820183545	-0.0830596149582968	0.18131451186382613	-0.4580968953035465	0.6468828293693647	0.9905110955795501
Mrpl45	357.69186593697214	-0.08859656495906182	0.12699338410653443	-0.6976470906920503	0.48539792421207145	0.9827898691553396
ENSMOCG00000002141	84.55300611672259	-0.02744854549596419	0.2836248075205294	-0.09677766107951402	0.9229029645229904	0.9969498598140254
Pgm2	152.59302131473143	0.6559544117238901	0.305868272811958	2.144565062905882	0.03198763817392727	0.8841458178596813
Prkcsh	887.3976977972522	0.17949311267840162	0.18154961555402116	0.9886725021733378	0.32282340070735843	0.9808680905137676
Nrbp2	1120.005090590555	0.19320351799365376	0.22130609531719872	0.8730148969314856	0.3826549580228168	0.9827898691553396
Vstm2l	843.2506105900112	0.09041584646744928	0.3130321015896205	0.28883889546249425	0.772704665777469	0.9932301794244984
Pigb	93.20069386540057	-0.02100229183333543	0.2391411654525484	-0.08782382486758772	0.9300167014217794	0.9969498598140254
Yif1a	81.4527267419854	0.14634311353182497	0.2599640286777293	0.5629360118635597	0.5734784570347606	0.9852153260815123
Dnah5	214.51786350466057	0.27017765476379135	0.3506353430222737	0.7705374262474979	0.44098116304084994	0.9827898691553396
ENSMOCG00000002156	669.8050155350934	-0.14586350827294248	0.13132651631447825	-1.1106935017118214	0.26670030029392294	0.9790994683758689
Mvk	215.9974521589535	-0.07759147182531377	0.1686874931743923	-0.45997169301163454	0.6455365388395626	0.9905110955795501
Shisa7	1769.2629030315195	0.1271126877550071	0.27333227765251233	0.46504821474690816	0.6418969293098398	0.9905110955795501
Rwdd4a	191.76119391604172	-0.03707446153112293	0.1808381425852083	-0.20501461141503366	0.837560709232367	0.9932301794244984
Hadh	147.0203102773272	0.19264902023778885	0.19384826574472735	0.9938134834359686	0.32031368053670556	0.9808680905137676
Zfp712	179.18325888175485	0.060611018652776925	0.2511341971866187	0.2413491246185666	0.8092845399909767	0.9932301794244984
Rfx7	1087.0334850090226	0.16786335310647676	0.17043224667065657	0.9849271859383281	0.3246598385152729	0.9808680905137676
Leprotl1	785.6525526245938	-0.026083854375117666	0.1433863478486813	-0.181913095399044	0.8556509273308267	0.9937217263181438
Rprm	131.60781766914974	1.1726719973997177	0.4513508730615519	2.5981383163067404	0.009373073000059323	0.8178174773001401
Sertad2	104.60797261226922	-0.0707141200626481	0.24982415899577762	-0.28305557135426307	0.7771342382857708	0.9932301794244984
Jdp2	250.6570328689535	0.20234586903909002	0.19853769025405324	1.019181137748524	0.30811697974093283	0.9790994683758689
Gabpa	426.90692415421455	0.13386985701311174	0.20013308710929256	0.6689041724520318	0.50355660843093	0.9827898691553396
Tmem65	336.67281318099333	0.3076675192797592	0.20397938988362266	1.5083265003160087	0.13147098402435542	0.9564021971810307
Mtch1	5619.889554753013	-0.19400632888006245	0.2532232038410838	-0.7661475170411938	0.4435885323525672	0.9827898691553396
Nkapl	29.31225987258627	-0.1495915532202825	0.43468742564876595	-0.34413591098711643	0.7307440773272246	0.990650758600675
Naga	250.64630964323638	0.027917370237035364	0.2517543463262493	0.11089131387172617	0.9117025336461343	0.9967185265324758
Col5a2	226.10501743552243	0.7247703664466764	0.7810572132005414	0.9279350528968061	0.3534412602547379	0.9827898691553396
Creb1	200.65470864671047	0.11396602826264716	0.19769676920007268	0.5764688453118397	0.5642983220877396	0.9852153260815123
Id4	1006.4545747825659	-0.005674939656264916	0.2828444597959496	-0.020063817620323717	0.9839924636875564	0.9991581039407021
ENSMOCG00000002196	45.22447154687334	-0.28962561745214954	0.3068880280661248	-0.9437501334843347	0.345297348486956	0.9827898691553396
Slc7a2	340.7817194186174	0.5526811311449257	0.31437208073262835	1.758047756203191	0.07873938393073035	0.9066875931076556
Slc5a3	738.8869761458374	0.27597783059294845	0.22143971304664037	1.246288783506602	0.21265839423694413	0.9739863498546697
Tmem44	348.5920454039303	0.14435918360707012	0.38460151656006814	0.37534741125890414	0.7074021101967718	0.9905110955795501
Hipk3	1254.8280950442097	-0.0289708935541202	0.23597886378089647	-0.12276901875847374	0.9022900080799757	0.9961191772170136
Arhgap21	2944.7453280933937	0.22446937900696434	0.18953979292824433	1.1842862943927748	0.23629975232493255	0.9790994683758689
Ppp1r11	2615.9750267464165	0.035925757391690724	0.10015936958168484	0.3586859376385304	0.7198300494592951	0.9905110955795501
Rita1	344.3430620903708	-0.001073660621752182	0.26738778811683045	-0.004015368949022701	0.996796207718874	0.9995554716927965
Gtpbp4	597.3550832530457	0.050854360986909077	0.13796173780247148	0.3686120644531201	0.7124169017586288	0.9905110955795501
Bysl	240.77921829447737	-0.06413015194707089	0.14010314693691656	-0.4577352711138345	0.647142644565976	0.9905110955795501
Plppr5	330.0230546687352	-0.01914073080982454	0.19994572985446496	-0.09572963035397933	0.9237353073457726	0.9969498598140254
Cabp7	178.45642564323597	0.08256321967360375	0.23450685465449367	0.3520716688441655	0.7247845148138299	0.9905110955795501
Drap1	965.625434638198	-0.026216714172237976	0.12969292397733675	-0.20214452237054373	0.8398037424246015	0.9932301794244984
Trappc12	746.9276888513638	-0.20451912123720667	0.1685021624698789	-1.213747753971799	0.2248440627169868	0.9790994683758689
Mlxip	221.5482571550333	0.2874498919238465	0.26304073978679443	1.0927960899016507	0.2744833387927119	0.9790994683758689
Nln	300.7464258240947	0.08134442749936464	0.1595758381802397	0.5097540356171385	0.6102237912532145	0.9867514538040189
Parp12	87.40063485711505	0.20198967372337362	0.2512735544642666	0.8038636383921509	0.4214757318945906	0.9827898691553396
Slitrk2	601.1161308939601	0.12182373646305218	0.19390716467148725	0.628258046418465	0.5298349101766524	0.9827898691553396
ENSMOCG00000002231	644.2100567532751	0.14754228824113966	0.23694942033796496	0.6226741894143383	0.5334986472365361	0.9827898691553396
Zfp748	178.14776832909297	-0.005789643206562596	0.1968273246674942	-0.029414834634079384	0.9765337415972433	0.9989651020729368
S100a16	627.0615463909596	-0.12208337568111237	0.25779650576723306	-0.4735648969243308	0.6358102125388196	0.9905110955795501
Zscan26	2869.3561560520657	0.16008113140278332	0.17826006598396008	0.8980201511716455	0.3691748064037714	0.9827898691553396
Tmem203	55.64789637714853	-0.11125190779197565	0.28715406683868433	-0.3874293302433849	0.6984383935848795	0.9905110955795501
Txn1	1110.4959995354304	-0.11570966160227292	0.14497495657452591	-0.7981355148245286	0.4247918537970393	0.9827898691553396
H2afy	1330.5480582349671	-0.034654542642422445	0.11895024584181409	-0.2913364524568345	0.7707940109367106	0.9932301794244984
Mapkapk2	380.15767326764444	0.03357213117654283	0.13657854940212066	0.24580822774518024	0.8058306876267047	0.9932301794244984
Itpr1	5804.42487802112	-0.3017449985029622	0.3056528282580141	-0.9872148091109658	0.32353734338995555	0.9808680905137676
Ttc9b	955.0180049185839	-0.01170433157777443	0.2024470762373174	-0.05781427815758671	0.9538965648779294	0.9974872856388627
C330007P06Rik	102.58840443430508	-0.2422854753279733	0.2153738065215998	-1.124953304401362	0.260608822206985	0.9790994683758689
Rras	45.115910405205824	0.6618739577611995	0.3334982068772939	1.9846402292793344	0.04718451314824196	0.8896038645099562
Slc30a6	100.07280853690371	0.18050041023217278	0.23067005959957604	0.7825047192752559	0.43391801297036797	0.9827898691553396
Usp34	3410.978248586929	0.1195310865421513	0.1548953952052062	0.7716890898131343	0.4402985940881988	0.9827898691553396
Abl2	618.6244862400874	0.08518354466358212	0.18379639446053891	0.46346689723486945	0.643029737183348	0.9905110955795501
Anp32e	644.9530388248317	-0.03136825130456743	0.16530767703899313	-0.1897567727430361	0.8494997307158816	0.9937217263181438
Bcap29	430.1296728542094	0.1597127333673907	0.2762337871510516	0.5781795739565186	0.563142887739575	0.9852153260815123
Chmp1b	369.2566824515994	-0.20551029441683305	0.15985419582573163	-1.2856108865661204	0.198578895432623	0.9672440546260765
Scn1a	1644.8283038716759	0.653713168052108	0.24191170894881925	2.702279980132804	0.006886574561068155	0.7793618429923805
Rapgefl1	2749.7128967364883	-0.19534693670447606	0.22975676428135058	-0.8502336691391698	0.3951951861692017	0.9827898691553396
Sntb2	321.3866641895747	0.23138726359508796	0.3044790628965577	0.7599447442916573	0.4472876143816738	0.9827898691553396
Kcnmb4	255.90759903265328	-0.09505425057670096	0.26127254121910143	-0.36381263079991666	0.7159979300684867	0.9905110955795501
Zfp787	212.6100458189257	0.10507519482993348	0.17923198923697672	0.5862524612780216	0.55770587212735	0.9852153260815123
Nrxn2	2380.476646697879	0.16062609137470268	0.21813974702769998	0.7363449053340377	0.46152082455713717	0.9827898691553396
Tbc1d15	591.6484725932421	0.020526370249000718	0.1362419021498762	0.15066121307099917	0.8802429713871146	0.9947879893448605
ENSMOCG00000002283	133.1774202380956	-0.3370340285890076	0.19682577477434812	-1.7123470184502103	0.08683273661877283	0.9208099655702215
Dpy30	538.4468227957539	-0.007442948538971848	0.17350530897776736	-0.04289752620725613	0.9657832207376932	0.9983627149610678
Msi1	514.0087849059472	0.12831886595314432	0.24487231361040515	0.5240235780893597	0.6002621406668218	0.9858063125051496
Zfp143	267.30406614484417	-0.005798447923327406	0.159480473893128	-0.0363583564920499	0.9709966189132448	0.9983627149610678
Slc25a18	287.12460653570975	0.08767697708083518	0.387265096665621	0.2264004110769082	0.8208900082370695	0.9932301794244984
Hsd11b1	142.42602203929124	0.46710925559286237	0.44327191156385254	1.0537758955782068	0.29198553179884906	0.9790994683758689
ENSMOCG00000002298	46.1740429065397	-0.07246899215092083	0.3227754967458339	-0.2245182576792245	0.8223540619399602	0.9932301794244984
ENSMOCG00000002301	37.627678146891	0.27617869387422445	0.3528291437904555	0.782754765967537	0.4337711350660364	0.9827898691553396
Prmt8	1263.0084959096341	-0.26811500460806437	0.16410821376520004	-1.6337695625136313	0.10230724569446971	0.9378550837358494
Gpr22	317.52054216171797	0.09355994331053293	0.35359574648176123	0.2645957827305449	0.7913208692727219	0.9932301794244984
Fibp	700.78080040988	-0.13678044499173186	0.1082720064805129	-1.2633038717754805	0.20647999533056371	0.970731939942315
Ddhd2	1443.0621799917612	0.08118339786702808	0.12115774460988354	0.6700636276156421	0.502817230086927	0.9827898691553396
Epha6	274.9427252969093	0.44231449599797773	0.38993244542678185	1.1343362194799247	0.25665354176562066	0.9790994683758689
ENSMOCG00000002315	126.40852044466337	0.14359039434328486	0.22754114290572258	0.6310524440091207	0.5280062343016483	0.9827898691553396
Frmd6	451.82774555744027	0.30380189182977263	0.2670109014732159	1.1377883455453122	0.2552088726221771	0.9790994683758689
Chordc1	1553.7865110184318	0.2426068382154751	0.1611027480785535	1.5059137172333046	0.13208932473108154	0.9564021971810307
Ift74	313.40728664243824	0.0523559729481713	0.2554740371119335	0.20493657022859052	0.8376216826424796	0.9932301794244984
Kif2a	2266.3810775180027	0.10614038210360731	0.16607413361764656	0.6391144712997565	0.5227484664064511	0.9827898691553396
Aff2	149.87469213903415	0.4841266285325339	0.4030724002695845	1.2010909906228717	0.22971590743462966	0.9790994683758689
ENSMOCG00000002326	728.9036260071176	-0.013173881254009354	0.22292666505748882	-0.05909513449461976	0.952876333981799	0.9969498598140254
Dag1	1454.051984706824	0.08472962781197914	0.2265535349573492	0.3739938457721716	0.7084088948629942	0.9905110955795501
ENSMOCG00000002329	927.5999851117617	0.03647814628031866	0.2739104721332582	0.13317543501064807	0.8940546377996019	0.9954333909839311
ENSMOCG00000002331	128.62623786155152	-0.09856610823072845	0.18371382057809696	-0.5365198324250618	0.5915993330434559	0.9852153260815123
Mllt6	905.396156019064	0.0834559522323626	0.1802823632781827	0.46291800659161997	0.6434231400696674	0.9905110955795501
Dnajb14	405.9940487303182	0.21040696699276434	0.2754025945333229	0.7639977660679073	0.44486857385749784	0.9827898691553396
Rapgef3	267.8133221130122	0.2905063063264921	0.2550640368329389	1.1389543972314964	0.25472217517667256	0.9790994683758689
Xpo7	2711.4355032322505	-0.09217626214792149	0.09312331276458496	-0.9898301446915059	0.3222571479989012	0.9808680905137676
Arhgap39	1147.4247882624638	-0.016364111069986788	0.10453961596697132	-0.1565350218538868	0.8756113160335326	0.9937688602708855
Kcnd1	72.59721978659384	0.06311848087222813	0.2163142306346929	0.29179070044088473	0.7704466559584248	0.9932301794244984
ENSMOCG00000002344	619.6322436517686	-0.2526584566303255	0.33233487374122705	-0.7602526144369016	0.4471036004018135	0.9827898691553396
Msrb2	202.20239326385385	-0.918212939275602	0.2656970364112103	-3.4558644374734953	5.485311174961691e-4	0.5486873934413619
ENSMOCG00000002346	439.5950063965244	-0.04896798991215834	0.16768582521391198	-0.2920222377156285	0.7702696214234235	0.9932301794244984
March9	104.66842494542533	-0.13876254689171358	0.25738370470723887	-0.539127164439369	0.5897991130607081	0.9852153260815123
Dera	59.683645842209856	0.46795317378358037	0.28212642845478164	1.6586647920458202	0.09718335778879933	0.9322829356632614
Gnao1	12767.377647142759	-0.10746606578071129	0.1508763901247016	-0.7122788773769638	0.47629210131178024	0.9827898691553396
Gga2	1013.8269375476906	-0.10904341099812916	0.13325366374188005	-0.8183145433761015	0.4131776038304124	0.9827898691553396
Ppp1r3f	651.9531149643402	-0.127998957353186	0.14975625994818356	-0.8547152379304498	0.39270881264362034	0.9827898691553396
Phf13	375.1544401711955	-0.32602536202983584	0.18586878789955488	-1.7540619149355123	0.07941989862244514	0.9066875931076556
Lkaaear1	27.836454435201563	0.4660537694953617	0.33380875174713903	1.396170013686156	0.16266330429394132	0.9612067070935637
ENSMOCG00000002368	1145.6647268239296	0.15868448454082534	0.2003417989638607	0.7920687812604206	0.4283205720462066	0.9827898691553396
Prr14	175.33821061236623	-0.08045443519654888	0.2596297031412374	-0.30988147435804764	0.7566510911572176	0.9923968896676919
Fam227b	31.639840230096127	-0.321328002962209	0.3655436741446139	-0.8790413449613885	0.3793788588158823	0.9827898691553396
ENSMOCG00000002373	298.10167387164245	0.056569488085579475	0.16901429098380394	0.3347023956157668	0.7378495941446654	0.9912761673515791
Plxna3	265.7482940587904	-0.06600976572102658	0.24491320539106756	-0.2695230974402742	0.787527170427897	0.9932301794244984
Exosc5	176.2358924436813	0.037875035483512884	0.2198330251620125	0.17229001627758045	0.863209532848303	0.9937217263181438
Nr1d1	1059.2382368059868	-0.1541965343684537	0.26109819205647344	-0.5905691385833198	0.554809148052703	0.9852153260815123
Gys1	433.1541530647315	0.4793081697790587	0.1568391560154899	3.0560491522392588	0.0022427448681219503	0.6951054810789936
Usp5	2954.6482876398527	-0.22778460937395947	0.20763965738858778	-1.0970188076725218	0.27263317055056163	0.9790994683758689
Mad2l2	139.09107792391825	-0.10332010548266161	0.19157340375625467	-0.5393238490146538	0.5896634155968259	0.9852153260815123
Gstm7	1668.3538629462846	-0.6842956859399556	0.20353317187702263	-3.3620843208468045	7.735649768235638e-4	0.5486873934413619
Spag5	88.01259870487267	-0.45882274804565626	0.3625119178134932	-1.2656763143486873	0.2056289915976204	0.970731939942315
March8	571.6246185966338	0.43615141907836597	0.1867705842878513	2.3352254357472497	0.019531647038336687	0.8838432118634834
ENSMOCG00000002395	790.0691252119202	0.03617330577829226	0.13693042793534088	0.26417288197896704	0.7916467060668513	0.9932301794244984
Gnpda2	304.8317599730529	-0.032272250274897565	0.22682974406712655	-0.1422752135423083	0.8868626240703488	0.9954333909839311
Tars	798.0551640644296	-0.186597758448778	0.21630882101720433	-0.862645164313187	0.38833259032702716	0.9827898691553396
Phip	767.8691541148395	0.29552920205385647	0.15067994296264786	1.961304180524646	0.04984354991759739	0.8896038645099562
Vash2	37.80000995266551	-0.3217801632384737	0.45748419461527534	-0.7033689185898041	0.48182587108101643	0.9827898691553396
Pdgfb	189.91232115060643	0.3557859099075357	0.20735989249864406	1.7157894210900124	0.08620059109825393	0.9208099655702215
Eif3a	3265.7090957968294	-0.08093885317615335	0.23001308045605348	-0.35188804486976816	0.724922225331722	0.9905110955795501
Zdhhc17	1142.495771794521	0.15110439436673645	0.1843762207354617	0.8195438314333234	0.412476205059656	0.9827898691553396
Bivm	762.5076350072383	0.14120445895701014	0.1811296817564545	0.7795765861658859	0.43564014196565015	0.9827898691553396
Gm45902	49.26331287059099	0.14689458538484154	0.25574640310278596	0.5743759583817246	0.5657134182304007	0.9852153260815123
Ccnq	80.90658410573248	-0.008088858872015377	0.23123557065713868	-0.03498103189326793	0.9720948659720554	0.9984120689781741
Dnah6	264.1470098451896	0.4475970850517218	0.3857306098676228	1.1603877773799975	0.24589096085123133	0.9790994683758689
Atpif1	1776.4417929330878	-0.2321810778983659	0.13085961199588927	-1.7742760685066028	0.07601749705980802	0.9066875931076556
Nup43	77.58998268797536	-0.03536560714704025	0.23228153670144966	-0.15225319949770907	0.8789872358792513	0.9947670066976839
Tfr2	69.69854534458845	-0.3892411522065942	0.272575421578826	-1.4280126577517909	0.15328821526657962	0.9564021971810307
Abracl	151.01427911744696	0.18017177544078042	0.3176874558585799	0.5671353152860551	0.5706222510757601	0.9852153260815123
Pacs2	1041.4773476034798	0.382738138985033	0.17199450069834618	2.22529288687143	0.026061582655985824	0.8838432118634834
Fopnl	246.20155800525944	-0.013144405243382796	0.1940978339416842	-0.06772051483754307	0.9460081183200175	0.9969498598140254
Epn1	3309.5321490191823	-0.01892268654537875	0.16632369219997054	-0.11377024099866695	0.9094199296291459	0.9967185265324758
Cdadc1	401.52808776162203	-0.015190205591339843	0.14942893273712896	-0.10165504974904702	0.9190304823443908	0.9969498598140254
Zfp280c	457.46458391527324	0.35622648909351845	0.3142400086385828	1.1336127778153977	0.25695701077213784	0.9790994683758689
Mtpap	325.66978264819164	0.11322296887195657	0.17419348765503706	0.6499839368058176	0.5157025976013551	0.9827898691553396
Rtcb	1025.31866928784	-0.06468462697637657	0.1500477510873499	-0.43109361191771933	0.6664003053127061	0.9905110955795501
Arhgdib	359.6402198651042	0.3712812719308072	0.33922058609254196	1.0945127953688483	0.2737301386709291	0.9790994683758689
Gm50318	75.76596982543879	-0.09946382202043057	0.3446104421209712	-0.288626837330469	0.7728669559232041	0.9932301794244984
Mtcp1	49.59776712412486	0.6401201331760855	0.3177244538169325	2.014702127853565	0.04393586912821281	0.8854355124960115
Btrc	1414.6421422117428	-0.1004921510397535	0.14371806961632475	-0.6992311496253129	0.48440758673740114	0.9827898691553396
ENSMOCG00000002453	75.90748407572885	-0.09591374308178718	0.3763027894014355	-0.25488448606600017	0.7988123189463444	0.9932301794244984
ENSMOCG00000002454	323.45278476581916	-0.34410724984267876	0.24336215774444028	-1.4139718887766972	0.15737015649463848	0.957385388462856
ENSMOCG00000002457	46.32517725351308	-0.23260236821237606	0.28535081664524053	-0.8151452690656097	0.4149891618796768	0.9827898691553396
Smndc1	409.1001752298157	-0.0732455306382123	0.23298885731417296	-0.31437353478001157	0.7532373541535671	0.9923968896676919
Bcl9	748.9304029477709	0.13112410517586523	0.14423794496230075	0.9090819008142201	0.36330689558587953	0.9827898691553396
Ppcdc	185.1920311160592	-0.6088517713573104	0.3562775935119554	-1.7089252381987907	0.0874647988404432	0.9208099655702215
ENSMOCG00000002464	948.3549751718482	0.17400746917905094	0.16126613477265966	1.079008121725947	0.28058410710130743	0.9790994683758689
Glrb	1471.153555442178	0.46661845973129196	0.22637638113728206	2.0612506366038215	0.039279134933328894	0.8842741452865222
ENSMOCG00000002467	151.10133923511165	-0.26865920278290706	0.18254707004931037	-1.4717256360802489	0.14109498190640885	0.9564021971810307
ENSMOCG00000002468	570.5361531758192	-0.18329659548076316	0.2630883471246482	-0.6967111903056633	0.4859835542746142	0.9827898691553396
Galt	314.40592318256034	0.007892524267811616	0.2543138472885602	0.031034583259857928	0.9752419594950869	0.9986064803838273
ENSMOCG00000002473	110.66105000060651	-0.11045421863046656	0.22597652533328938	-0.4887862509946964	0.6249930329034707	0.9892273736260639
ENSMOCG00000002476	203.82287366260954	0.18721197402504844	0.2537257761448405	0.7378516162984468	0.46060462328862295	0.9827898691553396
Hace1	779.6318787385551	-0.0870390347137613	0.15714561491302048	-0.5538750461598123	0.5796643639712904	0.9852153260815123
Cep55	63.51084358046734	0.2791422487481114	0.3236714312507125	0.8624247363119629	0.38845383329027783	0.9827898691553396
Ddx25	1470.5293037212366	-0.24444317596391515	0.14398183446416762	-1.6977362239730949	0.08955755764958917	0.9256682499605586
Rrp8	243.8730056762075	0.09061650335421542	0.14574195312574587	0.6217599079108792	0.5340997525279418	0.9827898691553396
St6galnac3	39.57048228078853	-0.43228072660550493	0.3052036935167732	-1.4163679397993523	0.15666780555157625	0.957385388462856
Atp13a3	447.54524511691875	0.16051918949535088	0.1683723269016616	0.953358502844132	0.3404084591830844	0.9808680905137676
Utp14a	293.6816923649491	0.21718770057365192	0.1674693402482834	1.2968803737547305	0.19467235038230515	0.9672440546260765
Selenof	649.5114047778846	0.049810018657899316	0.17847730233491338	0.2790832111773553	0.7801809669975582	0.9932301794244984
Rbm14	1017.542713946395	0.10422561923776988	0.12669964539458392	0.822619660166983	0.410724314938868	0.9827898691553396
Nsfl1c	1545.6049075779056	0.0029960337600485635	0.14512869212083168	0.020643979603661808	0.9835296572806992	0.9991581039407021
Tmem134	163.67830143828462	0.6114097143180769	0.23972402489991082	2.550473255959021	0.010757677737474306	0.8278134354129378
Chrm1	1030.4790100982434	-0.2565222495075412	0.33827791497470217	-0.7583180519683793	0.4482606029598886	0.9827898691553396
Tmub2	151.14616971094082	-0.01955778133000755	0.20248291862214407	-0.096589783785686	0.9230521699158273	0.9969498598140254
Gria3	2562.15432184126	0.09703574875432915	0.23993380131530054	0.40442717208824214	0.6858986223575131	0.9905110955795501
Klhdc8a	241.73031800772293	1.153019687599089	0.418486469573386	2.7552137797298486	0.005865379779979366	0.762152403329134
ENSMOCG00000002501	54.123062035051205	-0.27016639938758596	0.4303790742052152	-0.6277405561283494	0.530173912798461	0.9827898691553396
Matn2	168.47556896432675	-0.040411479859973336	0.32426419441738885	-0.12462516847591314	0.9008203021717445	0.9961191772170136
ENSMOCG00000002509	155.14514971127838	-0.06089517303659948	0.2938352030294116	-0.20724260540866557	0.8358203952024367	0.9932301794244984
ENSMOCG00000002512	137.03099184529034	0.39866249788333347	0.3986710486640773	0.9999785517890689	0.31732088765250416	0.9808680905137676
ENSMOCG00000002513	52.084661315481675	-0.1061345578151105	0.3801252275821602	-0.27920945550021564	0.7800840876457326	0.9932301794244984
Gigyf1	1100.8996294073975	-0.05777039743131623	0.116267897322014	-0.49687315898829854	0.619278500457438	0.9870832312028577
Cbln4	103.12138116350954	0.22112784828254128	0.35890581458243365	0.6161166503802978	0.5378175336106535	0.9827898691553396
Pdss2	235.20719644838903	-0.2869861065705259	0.15367492389649007	-1.8674881971233608	0.06183344354065447	0.8913498562012881
Mrpl2	249.69455068552293	-0.16070269858988145	0.13433482691014306	-1.1962847035741218	0.231585475930066	0.9790994683758689
Tprn	134.11287311856307	-0.01010779729129232	0.25662239141860355	-0.03938782284514073	0.9685811883386779	0.9983627149610678
ENSMOCG00000002528	209.7919283198321	0.008650060098730233	0.22629782848927196	0.038224229355078874	0.9695089027779659	0.9983627149610678
ENSMOCG00000002529	173.14013323769282	-0.08966574056607272	0.26969039936026534	-0.33247657602484	0.7395294243073064	0.9914566743662293
Fam129c	201.822060248768	-0.3365161032965824	0.3102148340573071	-1.084784047543054	0.2780173125257245	0.9790994683758689
Pds5b	2683.6078224357025	-0.04367242729966304	0.16510351574756488	-0.2645154290138559	0.7913827774428522	0.9932301794244984
Crem	136.47420204929162	-0.023459714995411007	0.26322353485529976	-0.08912468639366677	0.9289828185552513	0.9969498598140254
Ccdc85b	574.18563612526	-0.1453223819436352	0.17731260476299274	-0.8195829176266533	0.41245391511024615	0.9827898691553396
ENSMOCG00000002541	2358.012427927384	-0.07864723668264287	0.1522249540244423	-0.5166514070355029	0.6053995230490068	0.9858063125051496
ENSMOCG00000002542	325.4545947959557	-0.06315148889242	0.1338213281807581	-0.47190899799708036	0.6369917452078373	0.9905110955795501
Agpat4	318.93476485916796	0.32677063635303333	0.2546999825916951	1.282962931634249	0.19950506311604352	0.9672440546260765
Gpr6	281.8208959944271	-0.5652399692924329	0.3833139291774619	-1.4746136945906425	0.14031643099786226	0.9564021971810307
ENSMOCG00000002546	201.31737491661647	0.01785627754517564	0.2048253324907566	0.0871780718138537	0.930529969143156	0.9969498598140254
Kansl1	1744.5489237606382	0.0016857739808749928	0.08441429056710856	0.019970244013776537	0.9840671096673613	0.9991581039407021
Ppp1r14c	465.9271019455727	-0.055731560604909185	0.20677503458494395	-0.26952751194929414	0.7875237737993935	0.9932301794244984
Smg1	3140.115787413947	0.1671858154570312	0.19383038800651867	0.8625366598936417	0.3883922685996623	0.9827898691553396
Src	1186.343004748964	-0.05785042997092197	0.12850793792857917	-0.4501700899058351	0.6525878012757331	0.9905110955795501
Mrpl21	385.7923325562515	-0.2029526043101737	0.11600155623265931	-1.7495679446155052	0.08019289507744326	0.9066875931076556
Yes1	282.3911865783235	0.0827193466787166	0.20110578538186175	0.41132256101756715	0.6808360285631039	0.9905110955795501
Ppp1r1a	896.7587612799551	-0.2759826027195768	0.1613519525977366	-1.710438567840723	0.08718480424829904	0.9208099655702215
Camk1d	418.9971756904076	-0.2809752622063998	0.3104808269216374	-0.9049681585565843	0.3654822562193747	0.9827898691553396
Glyr1	1875.145329142241	-0.04801386772090995	0.14469599395634264	-0.3318258260515256	0.7400207817854845	0.9914566743662293
Arx	321.9662744489601	-0.15747398951667152	0.16162308553868857	-0.9743285681733638	0.32989342430666263	0.9808680905137676
Srrm3	1236.4076088995885	0.04755282997228275	0.17335415143267224	0.2743103039603378	0.7838461666955516	0.9932301794244984
Ndufs4	899.0329460592709	-0.18049591905306073	0.12557733150269476	-1.4373288307148608	0.15062458050694585	0.9564021971810307
ENSMOCG00000002570	163.97204834586205	-0.5674450397756928	0.22023210047137032	-2.576577340729034	0.00997838797909911	0.8278134354129378
Bhlhe41	784.2664381077763	-0.05388257217088969	0.15844187044964914	-0.3400778595832905	0.7337978946510568	0.9909445947637578
Celf6	374.4864315227129	0.03497719505058179	0.27906061971771745	0.12533905746343865	0.9002551325888846	0.9961191772170136
Atp8b1	53.56945426764462	1.3565123581006027	0.6070083992791648	2.2347505565186405	0.025433729501244607	0.8838432118634834
Htatip2	153.07532460795753	0.2619876173110184	0.21990647118130996	1.1913592897182779	0.2335125674852304	0.9790994683758689
Anapc7	568.3230692986772	-0.1266117505014333	0.1475038530596653	-0.8583623266452495	0.39069242342995114	0.9827898691553396
ENSMOCG00000002580	1997.6864892602096	-0.05821224668465866	0.10838131202515283	-0.5371059419464208	0.5911944366288963	0.9852153260815123
ENSMOCG00000002581	1317.7974785648996	0.0625800023423858	0.13944088998876317	0.4487923330626246	0.6535814700084249	0.9905110955795501
Rapgef6	1925.1567224692553	-0.01929760931915202	0.13216901608751339	-0.1460070589189712	0.8839158159368905	0.995162396455763
Tmem18	203.09485368207515	-0.018179630988442712	0.1910356493914289	-0.09516355217655187	0.9241849197103841	0.9969498598140254
Tubg2	838.1546291889837	-0.08564078144010302	0.1786576860308893	-0.47935682669312096	0.6316848016677288	0.9902831134386583
Mphosph9	618.8939343075832	0.3751674792813919	0.3271131516930683	1.1469042969981627	0.25142117657821716	0.9790994683758689
Cd63	152.49863485227434	0.292846835285763	0.2810568468863953	1.0419487677670178	0.2974354322653028	0.9790994683758689
Btbd1	3847.7205052703816	0.017501586255858	0.13286622877306423	0.13172336128957754	0.895203106886487	0.9954333909839311
Nhlrc1	185.2255434834926	-0.0702032496861503	0.2593331806394585	-0.2707067777175468	0.7866165635314658	0.9932301794244984
Sned1	48.992874593316216	1.2431874918410217	0.47006199259653714	2.644730932134886	0.008175589841312227	0.7793618429923805
Trmt2a	189.6117597198057	-0.059467587967474145	0.15905257122252647	-0.3738863666923971	0.7084888598812544	0.9905110955795501
Cog3	615.8065909269508	-0.029519888771437058	0.17183043207744134	-0.17179662772501728	0.8635974167947892	0.9937217263181438
Nell2	2230.264049152554	-0.17614252994649413	0.32164540494336014	-0.5476295549053835	0.5839462915237594	0.9852153260815123
Pdha1	2679.4360068482038	-0.003983675739265524	0.16497761856261373	-0.024146764718594872	0.9807355413318175	0.9991581039407021
Atp11c	238.50442253010021	0.2840931825097437	0.32931668443025386	0.8626747320781797	0.38831632879530353	0.9827898691553396
ENSMOCG00000002606	71.37225568475438	-0.44619064349695176	0.26930880228061577	-1.6567993311708682	0.09756005229337705	0.9331295853423318
Med4	248.41259306566224	-0.29409230810991915	0.13086906204086446	-2.2472256125598844	0.024625612102829042	0.8838432118634834
ENSMOCG00000002611	26.871348800384233	-0.49850577040120403	0.3775706860270301	-1.3202978643461645	0.18673558835103563	0.9672440546260765
Sh3bgrl	893.2169838484086	0.4793193639536893	0.3730949057171222	1.2847116286200533	0.19889307316710897	0.9672440546260765
Rabgef1	202.88155260559384	-0.13265409247113463	0.21796171263874317	-0.608611901903156	0.5427817136106854	0.9835123935726917
Alkbh5	1181.4357978729222	-0.23241253976137272	0.16145604452149762	-1.4394787166387404	0.1500149358814676	0.9564021971810307
ENSMOCG00000002617	56.34076896886741	0.12084131275086465	0.24457837712535355	0.4940801152218373	0.6212496005510508	0.987131271738163
ENSMOCG00000002623	127.67167834245808	-0.08961386051705623	0.2585854721148666	-0.3465541191627685	0.728926319668795	0.990650758600675
Mfsd4a	179.42767688435993	0.6187727870819236	0.4137982939642211	1.4953488115043452	0.13482343235295075	0.9564021971810307
Icam5	1502.7857905571	-0.22641281912264455	0.291333567024071	-0.7771600829777968	0.4370643294304097	0.9827898691553396
ENSMOCG00000002628	1989.9963873202628	0.06568451186119736	0.220685722298852	0.29763824853266935	0.765979278762284	0.9932301794244984
Itpkb	258.43958516093227	0.498050409307775	0.25880644434514516	1.9244127037407666	0.05430287334194225	0.8896038645099562
ENSMOCG00000002631	128.93535174656876	0.8724158908553614	0.5201283728262932	1.6773087884338918	0.09348211490782185	0.9274490592602745
Lman2	362.7674525976268	0.012551136353227122	0.2057603309427087	0.06099881495973013	0.9513601528249976	0.9969498598140254
Nfix	3209.526103530875	0.051112585847874606	0.2550738158671371	0.200383507315773	0.841180657163758	0.9934598315397855
Gabra3	1254.6424582991351	0.27324987152474645	0.21641425593976518	1.2626241757419179	0.20672427537369517	0.970731939942315
Lrrc3b	229.69666109516342	-0.24378698971497637	0.17762113858346454	-1.372511130483607	0.16990437631693786	0.9616795126262409
R3hdm4	1684.973349829345	0.0799084622832611	0.15725498742331867	0.5081458056917043	0.6113510938601628	0.9867514538040189
Rhoj	63.299845107281364	0.7162546294253409	0.3401767323629609	2.1055368027379173	0.035244607235987074	0.8842741452865222
Extl3	756.6275313543249	0.0573984227565637	0.28345562663637236	0.20249526685246075	0.8395295582750826	0.9932301794244984
ENSMOCG00000002649	191.64037846808438	-0.07726113937129378	0.29179603356713496	-0.2647778944312412	0.7911805669806772	0.9932301794244984
Stk32b	49.58291032651988	0.4018669886148104	0.4825781904327634	0.83275000110226	0.40498573842806634	0.9827898691553396
Gnb5	1562.7347249165482	-0.45897840231246123	0.20405774245652067	-2.249257473826348	0.02449611974602986	0.8838432118634834
Map4k2	576.3892778379312	0.20768751469680247	0.16278437151148656	1.2758443133599433	0.20201055937288068	0.9681356118033208
Asna1	1316.438150316818	0.03215064150141392	0.0938002875657026	0.3427563212841318	0.731781788091049	0.990650758600675
Zfp830	127.35572375660584	-0.09827507622539632	0.23316176809234113	-0.4214888102344273	0.6733981804592875	0.9905110955795501
Pkdcc	62.76579099676238	0.05477063947326853	0.23240960875410802	0.235664264342945	0.8136932018271618	0.9932301794244984
Ncdn	12329.604556137725	-0.09817800829628445	0.3469867362852407	-0.2829445567497922	0.7772193381885564	0.9932301794244984
Pkn2	406.03553591601855	0.2042110699530414	0.15532292817479706	1.3147516104204955	0.1885933950637623	0.9672440546260765
Zfp777	474.1863911278446	-0.0836436809926998	0.12680475754214296	-0.6596257318255683	0.5094940372237151	0.9827898691553396
Pyroxd1	337.8797909784638	-0.2906157783226996	0.23536357236902916	-1.2347525804334745	0.21692260041191916	0.9772502793407158
Lrrn3	938.897077633965	-0.2254675220366546	0.2325298826692163	-0.9696281589639462	0.3322318716896914	0.9808680905137676
ENSMOCG00000002676	1082.0576983746414	-0.025427318731304573	0.1507751727378948	-0.16864393699290947	0.8660767187771458	0.9937217263181438
Ripk1	295.24808801125477	0.34222793610105384	0.33272092824961147	1.0285735192596905	0.3036801268525946	0.9790994683758689
Nrp1	411.25873606078983	0.35900165883936797	0.2238368686037001	1.6038540079604808	0.10874623661461023	0.9402330488920683
Rab3d	50.64624713641854	0.1640020272547808	0.25959110182238737	0.631770604244329	0.5275367846329428	0.9827898691553396
Wdr59	503.08577720637055	0.15258130042529397	0.22760734272844388	0.6703707296795659	0.5026214889101288	0.9827898691553396
1700037H04Rik	801.9516576247158	-0.43801826528431675	0.2780662223957324	-1.5752300351710722	0.11520335674914359	0.9402330488920683
ENSMOCG00000002688	69.62554958102757	-0.1830587566831862	0.4163135962154834	-0.4397136157629481	0.6601445398312853	0.9905110955795501
Zfp423	210.81386751539532	0.016250690732296562	0.3118590411540638	0.05210908964562755	0.9584417703180059	0.9983627149610678
ENSMOCG00000002690	248.45405691066222	0.019560125080480013	0.5852105847985459	0.033424079448620074	0.9733364077648082	0.9986064803838273
Tspan9	121.63201695442838	-0.32903741775529555	0.2899312804221135	-1.1348807113059587	0.2564253027494438	0.9790994683758689
Mcm2	47.16555824273955	0.01435655385212095	0.3147116763564073	0.04561811629722413	0.9636146294863458	0.9983627149610678
Bcl6	450.4768050090418	0.1222945607801808	0.2312128061647626	0.5289264154902973	0.596856496646844	0.9858063125051496
ENSMOCG00000002696	144.75985797802326	-0.16252177699787504	0.19931276314147278	-0.8154107867267718	0.414837211977764	0.9827898691553396
Fam222b	589.8314259396736	0.06808291770024068	0.13690580880502087	0.4972975091013363	0.6189792680422276	0.9870832312028577
ENSMOCG00000002706	89.52835395937275	0.025349056546088714	0.2337955910124722	0.10842401448338873	0.9136593526205025	0.9967783847173113
Bche	173.64094618670836	0.8198465504128528	0.40273410176677626	2.0357018360655905	0.04178030462052739	0.8853224201958388
Zbtb12	106.65451505591662	-0.6827111567887544	0.25939629196560604	-2.6319233463802814	0.008490301626293124	0.7860334207914733
Llgl1	651.7023265753218	0.1939292868269537	0.2034528602070298	0.9531902703634391	0.3404936752040477	0.9808805921317556
Rims3	640.9545755571305	0.04328051784049745	0.33463252157485124	0.1293374524293401	0.8970906375467822	0.9956048882852729
Crcp	700.9244371316544	-0.069759236920551	0.17862402360634652	-0.39053670112306466	0.6961397219523544	0.9905110955795501
Arhgap24	151.82018448604344	0.5853533616791649	0.31164382333367596	1.8782767950206702	0.06034330929593464	0.8906097992566931
Scand1	401.2072279124233	-0.0671277891459645	0.16530042312463514	-0.40609568854733485	0.6846722935208076	0.9905110955795501
Pten	5317.359444745707	-0.1368019820663598	0.21044947908942627	-0.6500466651581901	0.5156620789563817	0.9827898691553396
Lmtk3	1821.7189972567012	0.04799118563600025	0.22506760499174505	0.21323008985571448	0.8311474995954251	0.9932301794244984
Nwd2	310.5845953194246	0.3571360670461937	0.4255883380798714	0.8391584897685072	0.40138037763371204	0.9827898691553396
Rabac1	389.9219727850371	0.2393433214505623	0.2675550083265222	0.8945574330586609	0.3710237151758242	0.9827898691553396
Rnf215	172.12860378728448	0.3404349827700297	0.3215042500542144	1.0588817495029166	0.289653636914005	0.9790994683758689
Carf	112.93536854458516	0.017560317427739572	0.20874513997076483	0.08412323961266321	0.9329584475935035	0.9969498598140254
Iqgap2	491.1047106861874	-0.441207847277484	0.25967431600742497	-1.699081580578298	0.08930381342225045	0.9256682499605586
Cfap206	101.11295093798907	0.3336188338789509	0.4948275031290642	0.6742123907205987	0.5001762931743885	0.9827898691553396
ENSMOCG00000002741	384.9601963983842	0.03081679617682885	0.18819139005681326	0.1637524233575486	0.8699260466434031	0.9937217263181438
Cutc	120.18034470498182	-0.1521797665002611	0.25309153319643346	-0.6012835142222988	0.547651167990556	0.9845706144959181
Rnf111	953.1657984641868	0.019689670327982495	0.14557251919950595	0.1352567808557188	0.8924088548739069	0.9954333909839311
Snx7	146.6902156711828	3.209379028337141e-4	0.19147476673663916	0.001676136800182882	0.9986626369515462	0.9995692383385617
Flrt2	227.46293489491438	0.23588200291845388	0.30583788269881734	0.7712648310175018	0.4405499736336258	0.9827898691553396
Ddit3	195.87650707210915	0.17712043005350822	0.23118952496718906	0.7661265365662461	0.443601014730899	0.9827898691553396
ENSMOCG00000002752	122.40948730083782	-0.034827541165535936	0.22749086913279495	-0.1530942375766554	0.8783239600580879	0.9945974584303666
ENSMOCG00000002756	105.72948695237547	0.21300371340369997	0.30785950321047717	0.6918861077290628	0.4890088555656512	0.9827898691553396
Rpgrip1l	396.63468420741685	0.14515991663222946	0.15092577766320198	0.9617967114680747	0.33615173028152	0.9808680905137676
Rbl2	1235.1105425270043	-0.08157658182091196	0.1234957813515066	-0.6605616882468249	0.5088934453106784	0.9827898691553396
Vwa5b1	105.82048401075839	0.4185592611999325	0.49517365417270987	0.8452777276675238	0.39795579335801157	0.9827898691553396
ENSMOCG00000002760	5118.9735506994375	-0.006544752988421729	0.14195091710372937	-0.04610574642247087	0.9632259658981964	0.9983627149610678
Zfp1	191.36226056647612	-0.05228735992270662	0.1903434229363822	-0.27470011370018516	0.7835466438001027	0.9932301794244984
Top2b	2742.6525793445885	-0.13357011908731933	0.19148542327290935	-0.6975471908216856	0.48546041731201534	0.9827898691553396
Rap1a	893.4423962976223	0.30529477540162847	0.27068988791704957	1.1278396018073022	0.259387665216537	0.9790994683758689
Plekhf2	54.46058419366231	-0.011602571526283393	0.2318214725995581	-0.05004959806430593	0.9600828642785321	0.9983627149610678
ENSMOCG00000002769	73.89414506339442	0.2606808697238007	0.292132199720513	0.8923387082053871	0.37221141262839913	0.9827898691553396
Nlgn2	1753.4213067882984	0.050338069082685025	0.18208612769900254	0.27645197203543354	0.7822009434527871	0.9932301794244984
Zmynd11	4121.210280387908	-0.10988312308634311	0.15700397502614788	-0.6998747838584525	0.4840055063385788	0.9827898691553396
Tomm20l	22.818618813995915	-0.1536542500728897	0.3814866785681221	-0.4027774984165054	0.6871119159312805	0.9905110955795501
ENSMOCG00000002774	3828.364701545695	0.03444956295449894	0.17154119646359234	0.20082384677671564	0.8408363157477496	0.9933710336992939
Rabl2	509.46682412763	-0.04520647615117396	0.181001518342404	-0.24975744162353386	0.8027749335010766	0.9932301794244984
Zfp868	201.6235759987963	-0.024466269542855006	0.20098997653643036	-0.12172880441339015	0.9031138002495396	0.9961191772170136
ENSMOCG00000002777	248.79809246434232	-0.4409132129319817	0.4213873574048136	-1.046337070118623	0.2954054360140027	0.9790994683758689
Rnf34	1006.2288881254118	-0.12166237332168277	0.11820541828267975	-1.0292453179323469	0.3033644118064694	0.9790994683758689
Kalrn	3750.6295360007534	-0.21837642912667884	0.3175979061852157	-0.6875877481362449	0.49171242574649393	0.9827898691553396
ENSMOCG00000002782	225.72976574148592	0.006313652797259217	0.16182520221300833	0.03901526283247674	0.9688782198980788	0.9983627149610678
Sars2	119.1462534767109	0.19185442746241313	0.25046042363282506	0.7660069590222832	0.4436721614762818	0.9827898691553396
ENSMOCG00000002787	602.6497958815706	0.037048083896822404	0.17692421459351745	0.20940086681712958	0.8341353161418704	0.9932301794244984
Fam49b	2687.6480340733815	-0.14046686714175113	0.19237436730128588	-0.7301745503430811	0.4652834966611115	0.9827898691553396
Stmn3	3904.398115895558	-0.030664242971696884	0.14575019387718322	-0.2103890372697287	0.8333640481765215	0.9932301794244984
Coq10a	276.53166965926005	-0.022110117321981967	0.12968300611401726	-0.17049355952269304	0.864621998970929	0.9937217263181438
Rhbdl2	29.428395568754055	0.16872208464333152	0.35236029767476146	0.4788339825932001	0.6320567391444165	0.9902831134386583
ENSMOCG00000002796	808.708320592845	0.07676409178655255	0.22625564533930376	0.339280337829509	0.734398553293542	0.9909445947637578
Mpped2	1457.8225387210477	-0.44704450730284806	0.1788540185378153	-2.499493782457725	0.012437088151263606	0.8666807996061601
Xkr7	30.306767739088727	0.13733918934177605	0.36037322032573904	0.38110265024031487	0.7031270809448702	0.9905110955795501
Ttc30a1	42.52910693846274	0.4404445936309328	0.3920181296292157	1.1235311847631142	0.2612119638690641	0.9790994683758689
Pcyox1l	166.9566681511318	-0.03528306954347478	0.21613443502654833	-0.1632459424577156	0.8703247944918826	0.9937217263181438
Azin1	2802.1455812047443	0.06415293819158685	0.11763512086365825	0.5453553132821749	0.5855091682062092	0.9852153260815123
Mettl9	1565.8799000326762	-0.14171030437552629	0.1633190019658754	-0.8676902422238404	0.38556392907712556	0.9827898691553396
Csnk1g1	249.0721655867529	0.08176330030644315	0.1972657879273483	0.41448292258643465	0.6785204712313254	0.9905110955795501
Scube1	103.50938229599767	0.7783494441511216	0.4236287748757829	1.8373384678114713	0.06615994440039746	0.9002990712532849
Kcna5	60.675447561691456	-0.6287359671311018	0.3630552940671912	-1.731791210334866	0.083310743698190165	0.9160440428753533
Ppfia3	1890.223565630486	-0.01681323371555768	0.1915243250490339	-0.08778641413435692	0.9300464360240068	0.9969498598140254
Dolk	93.5767929460986	-0.06033672929490294	0.2909030591497443	-0.20741180746347604	0.8356882620754253	0.9932301794244984
Cpne9	270.73149379944795	0.9006710452341626	0.4742507032249765	1.8991454079234114	0.0575453602284259	0.8901914908805476
Wrnip1	466.1684083168487	-0.2430667131762656	0.16678263357148007	-1.4573862276379725	0.14500979661418437	0.9564021971810307
Pnpt1	352.6838381592962	0.22555981115827645	0.21025631958676244	1.0727849303250028	0.28336762371253277	0.9790994683758689
Tbc1d8b	89.61512299659452	-0.18268824176197226	0.3126743033548594	-0.5842764813155632	0.5590343126946622	0.9852153260815123
Tdp2	700.1641936295562	-0.15181505469765913	0.16074531835627962	-0.9444446423078572	0.34494247776018183	0.9827898691553396
Wscd1	1082.392594189049	0.20043678532919323	0.28591562468901144	0.7010347389975872	0.4832813358887708	0.9827898691553396
Zfp326	630.0605739740553	0.15329659063248716	0.2618208961028751	0.5855017415120816	0.5582103959591882	0.9852153260815123
Smad1	394.0176012209833	-0.12630614700125942	0.13116176592577858	-0.9629799210902144	0.33555759974655097	0.9808680905137676
ENSMOCG00000002830	502.54149111488886	-0.1246672667836172	0.14967700670537232	-0.8329086045194312	0.40489627649749554	0.9827898691553396
ENSMOCG00000002832	7756.631175994251	0.024412476759632987	0.15674567816861576	0.15574577267369244	0.8762334160008141	0.9939168414943764
Slc6a15	306.2776253289158	0.026390075865967706	0.27281259455024415	0.0967333488011215	0.9229381554972509	0.9969498598140254
Hps1	93.98309539145862	0.45652435637207345	0.3614372808289367	1.263080430787493	0.20656027599387805	0.970731939942315
Fgf22	98.02082400799159	0.08026258638861837	0.2977458557847621	0.2695674342034822	0.7874930568486206	0.9932301794244984
ENSMOCG00000002841	189.46618449489785	-0.01601193890485581	0.19747821187592537	-0.08108205331996847	0.9353766980652909	0.9969498598140254
Pik3r1	2356.8087023147905	0.02728990742893533	0.3032410243690034	0.08999411437064397	0.928291891903136	0.9969498598140254
Cdk5rap1	256.1157572221108	-0.305063459713149	0.1567195913121119	-1.9465559931534386	0.05158798885424543	0.8896038645099562
Maged1	9615.538336455158	-0.16606290237886626	0.20152475315124252	-0.8240322827947469	0.4099212150761277	0.9827898691553396
Gpr75	1437.5300761400658	0.13249125670331144	0.15819713725801016	0.8375072962744329	0.40230747744308076	0.9827898691553396
Ccnk	294.85955637761214	-0.09497824825332525	0.19388833082507717	-0.489860569994865	0.6242325663262098	0.9887282962523538
Myorg	1150.8310064669713	0.2912860207614873	0.3161825357279804	0.9212590445289104	0.35691519813330863	0.9827898691553396
ENSMOCG00000002852	3705.1204687131835	-0.1776238550999665	0.233811003826134	-0.7596898871023655	0.4474399750938469	0.9827898691553396
Esyt3	58.525302392212666	0.5594777156648909	0.35503048628271433	1.5758582355076212	0.11505847786184763	0.9402330488920683
Alcam	1382.788905172162	-0.07603494835332267	0.27417587783588365	-0.27732180144175816	0.7815330206835353	0.9932301794244984
Nelfcd	827.1919758281466	-0.09886933827532474	0.1306521958297755	-0.756736904782985	0.4492075002148245	0.9827898691553396
Ankrd63	280.5381092205519	-0.3673043408773106	0.42732987335043326	-0.859533498085451	0.39004624696494294	0.9827898691553396
Armc9	593.1926803378258	-0.04247532540951436	0.10914173858215721	-0.3891758181728135	0.6971460904933617	0.9905110955795501
ENSMOCG00000002869	65.78404672439983	0.09350584794918353	0.26435716503721973	0.3537102840999922	0.7235560146359963	0.9905110955795501
Zcchc3	122.0215073927875	-0.3884665776840456	0.3174721934904755	-1.2236239445509107	0.2210941225359559	0.9790994683758689
Dcc	287.1631966770637	-0.11595959131869306	0.26944300143852723	-0.4303677983825791	0.6669281158046378	0.9905110955795501
Ecd	529.9955247259782	-0.10512655361383584	0.12656099290743994	-0.8306394505826916	0.40617734130338684	0.9827898691553396
Acan	41.8858268911372	0.39884800392841696	0.5305693412631357	0.7517358673210792	0.4522099162762311	0.9827898691553396
Nhsl2	229.90462412745384	-0.09727217882310991	0.32759820503395537	-0.2969252496759795	0.7665235785773974	0.9932301794244984
Ankrd9	108.97709427984505	0.2843835174090342	0.2537414225196656	1.1207611062675185	0.26238956378998707	0.9790994683758689
Acp2	499.1803721411978	0.0024055023188230356	0.1914191220642387	0.012566677210105313	0.9899735061737754	0.9991581039407021
1600012H06Rik	103.2823693191801	0.2442660261457334	0.18972742192998351	1.2874576782889964	0.19793481171157637	0.9672440546260765
ENSMOCG00000002885	48.2244366334546	0.0801718271639128	0.26710822812444884	0.3001473512323245	0.7640647621775133	0.9932301794244984
Gm50241	930.5464233940602	-0.20988982497100733	0.1943091947130213	-1.0801847297087375	0.28005992695142307	0.9790994683758689
Mppe1	226.06564076696623	-0.06570078152895759	0.1968712429213284	-0.3337246240438083	0.7385873665278382	0.9913222201471472
ENSMOCG00000002892	609.5077610113968	-0.097721840536865	0.1960863193407237	-0.4983613383402923	0.6182293816547861	0.9870832312028577
Mospd3	287.5293010078987	-0.17477086349739146	0.16784090812004662	-1.0412888339020916	0.297741517439758	0.9790994683758689
Cpne5	3310.3827158847644	-0.5173532392381335	0.29433240894033774	-1.7577175449374414	0.078795581055737	0.9066875931076556
ENSMOCG00000002895	129.78399513541862	-0.20352785283794356	0.21886102260015955	-0.9299410668009699	0.35240159864426956	0.9827898691553396
Htr2c	788.4066633976512	0.3700155748727116	0.34972175971084213	1.0580284600496372	0.2900424675524776	0.9790994683758689
ENSMOCG00000002902	119.76469339912961	-0.26293942418117483	0.22364020752684186	-1.17572518416491	0.23970471151629918	0.9790994683758689
Gpr146	38.75445271376104	-0.1037453561294578	0.35401030968044034	-0.29305744294031194	0.7694782449519927	0.9932301794244984
Zfp768	203.7342628988187	0.3509384775143909	0.17693911441005544	1.9833855204061486	0.04732438324999752	0.8896038645099562
Tkfc	187.17054653916455	-0.522888261040135	0.2821142382480671	-1.8534628535138018	0.06381604565646029	0.8971931179383005
Id2	691.7352720126049	0.2050799832287225	0.2883544911850293	0.7112078691263671	0.47695543295633186	0.9827898691553396
Borcs6	128.1472369283629	-0.19361754217898242	0.24566709690300323	-0.7881297276673093	0.43062082817744934	0.9827898691553396
Cox8a	1808.3524899129495	0.1617723692590878	0.26570626355585186	0.6088391259360847	0.5426310767972914	0.9835123935726917
ENSMOCG00000002917	3316.78570642045	-0.05528902013892263	0.18633159009628392	-0.2967238143052013	0.7666773742367198	0.9932301794244984
Ak5	2834.3705759195586	-0.5436994892399999	0.290721278793168	-1.8701743866048821	0.06145960532822643	0.8911089989335398
Fkbp14	44.56229577544536	0.3408703380003174	0.3816732051358745	0.8930947559679192	0.3718064310369823	0.9827898691553396
ENSMOCG00000002921	4216.073237707197	-0.03245350227745069	0.21513506838762994	-0.15085175336907897	0.8800926600689221	0.9947879893448605
Lmnb2	317.0284320447711	-0.09381480768194321	0.16833017491728428	-0.5573261462363646	0.5773046147858608	0.9852153260815123
ENSMOCG00000002929	57.76981574686092	-0.20359502032836	0.26180476648011314	-0.7776597159235648	0.4367696466999181	0.9827898691553396
Asap1	2492.9442958003965	-0.013889776181474309	0.327703624208731	-0.04238517720093083	0.9661916446108036	0.9983627149610678
Ccnt2	1612.6837147469919	0.4157814436936874	0.28540244048348	1.4568251168046833	0.1451646608200728	0.9564021971810307
Efhd2	2848.4157848157915	-0.20049689476981092	0.5134574231848336	-0.3904839733861173	0.6961787039959852	0.9905110955795501
Tmem38a	612.6994795660528	0.019117227758457988	0.20351462597025238	0.093935399813733	0.9251604731675587	0.9969498598140254
Xpc	362.424425908438	-0.08814091881994057	0.21890459145067653	-0.40264536360718794	0.6872091326871941	0.9905110955795501
Nop9	188.7337924559998	-0.16595176173986756	0.1435114944573761	-1.156365644210864	0.24753162803207845	0.9790994683758689
Rnf146	860.7760280155392	0.08585027701360544	0.18193686121527552	0.47186851768330607	0.6370206406803882	0.9905110955795501
Irf2bp1	469.3038565248813	-0.22672630230988935	0.25406312892176075	-0.8924014408234348	0.37217779912043936	0.9827898691553396
Egr4	343.0660029347821	-0.42011389610453337	0.4153149860177486	-1.01155486858974	0.31175093401532517	0.9790994683758689
Atg4d	205.10435610971768	0.22509984516684917	0.19197635804304344	1.172539407776342	0.2409805600917733	0.9790994683758689
Gfod1	508.8463668873149	0.0874290888383558	0.3654034795365941	0.23926725861842824	0.8108983519723224	0.9932301794244984
Zbtb3	32.73933030522298	-0.16474409534776438	0.315506441114073	-0.5221576293848159	0.601560584199555	0.9858063125051496
Myof	39.89163863236139	1.3023195693125522	0.49224884749757897	2.6456528561378856	0.008153344078051215	0.7793618429923805
ENSMOCG00000002967	212.12865134731132	0.0010254493761286774	0.16341296038160996	0.006275202246712854	0.9949931458715738	0.9993604035718797
ENSMOCG00000002970	833.7488236809074	0.08017629685223165	0.1292700005668466	0.6202235360150078	0.5351106281953733	0.9827898691553396
ENSMOCG00000002972	133.53487584845337	0.20545459583863984	0.1956022105997476	1.0503694984258267	0.2935482635280566	0.9790994683758689
Unc5b	125.0334874924166	0.6867353576695812	0.35669738970054315	1.9252603957828611	0.05419678965642722	0.8896038645099562
Nat14	427.0966067780132	-0.42885366471946157	0.2999324126867911	-1.4298343446038237	0.15276456931140575	0.9564021971810307
Tcaf1	8479.16713368382	-0.20412430070231527	0.15568096992640001	-1.3111705354791752	0.18980015455769533	0.9672440546260765
Manba	116.3156699379145	0.3122101982838256	0.34422879461583594	0.9069845497157101	0.3644149676355135	0.9827898691553396
Fbxw7	1681.2630454432353	-0.019418696232365053	0.3020788288808875	-0.06428353918182736	0.9487444601733634	0.9969498598140254
Mrpl9	519.722052313807	-0.07113632729843	0.1195811446415544	-0.594879130080765	0.5519242685653745	0.9848857854361492
Map4k1	71.37147267838237	-0.6286751421434226	0.33789617907705827	-1.8605571210086138	0.06280674487218445	0.8939331052483455
Gpr137b	91.35687010074722	0.31798295576703695	0.2706260318119525	1.174990275835663	0.2399986062129511	0.9790994683758689
Vps35	2380.067040656775	-0.16458430209919253	0.16149548289193044	-1.0191263504833077	0.3081429857921658	0.9790994683758689
Pomgnt2	295.7634168555381	0.08359991180037693	0.27400811026728966	0.3051001363383982	0.760289887365514	0.9932301794244984
Snx19	1801.5654630756032	0.020166492391886216	0.1661266398162528	0.12139228491102756	0.9033803274392559	0.9961191772170136
ENSMOCG00000003001	400.17874072651466	-0.18722570071015968	0.16937031006257183	-1.1054221996818179	0.26897668882009645	0.9790994683758689
Fkbp9	209.03468571966695	0.23085711198370315	0.21579163837232815	1.069814909071597	0.2847026300666513	0.9790994683758689
ENSMOCG00000003004	72.59313033657196	-0.7787531893467126	0.8308937889144222	-0.9372475757270585	0.3486312225056999	0.9827898691553396
Arfrp1	637.8300671680563	-0.11693298109696287	0.13186337677939122	-0.8867737498683425	0.3752007230538194	0.9827898691553396
ENSMOCG00000003007	7859.671903574532	0.28215097725593813	0.2331924998337103	1.209948765321098	0.22629855328419426	0.9790994683758689
Lrrcc1	797.3257992061122	0.344038761119855	0.2862380834586706	1.2019321711589441	0.22938980879009238	0.9790994683758689
Echs1	531.569498654506	-0.22948827340541914	0.1721363513971719	-1.3331772838377327	0.18247363215592693	0.9662432145671542
Siah2	198.99727570595775	-0.18927765257958862	0.2117260413139305	-0.89397436141992	0.3713356090413448	0.9827898691553396
Cntfr	621.6037318250425	0.09748173091542518	0.15774805600995412	0.617958365897542	0.5366027834820235	0.9827898691553396
ENSMOCG00000003014	230.94999651900994	0.23583612752276786	0.23264292044270232	1.0137257866002933	0.3107136159902233	0.9790994683758689
Adgra2	254.85585175791888	0.18877530934437722	0.3566172825167342	0.5293498621607576	0.5965627720339758	0.9858063125051496
ENSMOCG00000003023	672.1391573694237	-0.2523118535525035	0.20702194626571882	-1.2187686286585953	0.22293202160642464	0.9790994683758689
Nudt4	3991.7349630021085	0.3204068182090441	0.37059034562818427	0.864584903489392	0.38726666138725063	0.9827898691553396
Irs2	1118.041861611073	-0.1558181422874577	0.30442017425045714	-0.5118522209348079	0.6087544393365467	0.9867397952499977
Setmar	184.2310019869487	0.20691866024603964	0.23556149239084848	0.8784061356799181	0.37972335584247496	0.9827898691553396
Stambpl1	185.6641157899211	-0.176315154238255	0.2540238139985157	-0.6940890755985785	0.48762634910994906	0.9827898691553396
ENSMOCG00000003029	411.02684644388495	0.037118158164383644	0.2082880120608866	0.1782059264819009	0.8585612555640829	0.9937217263181438
Il1rapl1	68.90968634755869	0.2208503649747035	0.3423006164929541	0.6451941782560285	0.5188013584384901	0.9827898691553396
Pamr1	90.67962951209402	-0.006182091489102137	0.37454541474528913	-0.016505585826771606	0.9868310458504674	0.9991581039407021
Gucy1a1	3660.4445465894682	-0.6457924544233365	0.27250160976766047	-2.3698665669312935	0.017794505893993832	0.8796473849899012
Dnah2	175.8189052362211	-0.01845191220235443	0.38244501700414973	-0.04824722870465382	0.9615192109257807	0.9983627149610678
Zfp647	103.27819498187387	0.07512415205191827	0.22740523562443662	0.3303536607045715	0.7411327512104974	0.9914566743662293
Mink1	6818.044316105198	-0.28579054008656796	0.1710341756347244	-1.6709557550470342	0.09473041742844139	0.9274490592602745
Sdhb	1804.1782713217813	-0.1563564475686009	0.08661087463886633	-1.8052750098708332	0.07103165816903922	0.9056038784335924
Psip1	4095.504689393769	0.10096814180782261	0.22927835907520136	0.4403736236384434	0.6596665252644309	0.9905110955795501
Col12a1	83.92602805358125	1.2458621013698763	0.6039930690968219	2.0627092678941996	0.03914025884613017	0.8842741452865222
Zfp711	301.03911560022834	0.14459140065551243	0.25952722581798315	0.5571338428936938	0.5774359863988864	0.9852153260815123
Pcdhb14	61.178209144462436	0.17606408115901537	0.4192008947811576	0.41999929711726647	0.6744859671702264	0.9905110955795501
Ptov1	2122.597434906213	-0.15266234628062464	0.12635374436964295	-1.2082138684708614	0.22696500862254462	0.9790994683758689
Camk2b	18738.749320983206	-0.23418983348584918	0.17058929789277305	-1.3728284035324032	0.16980569849077823	0.9616795126262409
Aopep	214.32495323649783	0.24404552388578196	0.22069227176878925	1.105818169027047	0.2688052292578758	0.9790994683758689
Hax1	640.6420882858292	-0.07726352141446212	0.12077306664710681	-0.6397413227919638	0.5223407857031954	0.9827898691553396
Kif1a	12475.131049434705	0.09163481790035095	0.26229952576734517	0.3493518245306678	0.7268251959724112	0.9905110955795501
Atp13a2	4118.733222543874	0.22015235592076293	0.23087389049740686	0.9535610780693092	0.3403058654180637	0.9808680905137676
Srrd	55.98925118720228	-0.20699653227052417	0.25771592895607637	-0.8031965005384027	0.4218611678542349	0.9827898691553396
Plcb3	103.162938914315	0.1479026246539487	0.35252262837647647	0.41955498100960525	0.6748105817209304	0.9905110955795501
Kcnn1	183.2353132076659	0.43892472621096834	0.23143249398519758	1.8965561777986195	0.05788653893955412	0.8906097992566931
Adrb1	63.99251405976591	-0.14662388714997773	0.2622459610203369	-0.5591082759844953	0.5760878269492951	0.9852153260815123
D430041D05Rik	455.46842940293607	-0.12697749707504402	0.3436662178572245	-0.3694791355017518	0.7117706221673676	0.9905110955795501
Kctd1	1118.9636020186003	-0.3169849744627917	0.14300482309795248	-2.2166033815913324	0.026650206296645034	0.8838432118634834
Fuz	268.4213152202989	0.005673797280082818	0.2050605948077125	0.02766888141236105	0.9779262432322742	0.9991581039407021
ENSMOCG00000003083	934.4412827888115	0.06638735095870651	0.23327490034387072	0.2845884870633097	0.7759594326714794	0.9932301794244984
Ano8	445.46994302448445	-0.03579596100428876	0.17378632777161435	-0.2059768536644086	0.8368089917238544	0.9932301794244984
ENSMOCG00000003086	860.0117678472567	0.14976085017766969	0.2644412901154829	0.5663292979408334	0.5711699474860978	0.9852153260815123
Ccpg1	1270.9126053322245	0.09792057582480261	0.13715803901099088	0.7139251664057106	0.47527345456610137	0.9827898691553396
Nubp2	109.25892165629814	-0.08325305592443244	0.19700109152051504	-0.422602003277544	0.6725856647712077	0.9905110955795501
Bhlhe22	46.45359985781691	-0.596821830478159	0.537261500766145	-1.1108591060909443	0.2666290001508147	0.9790994683758689
ENSMOCG00000003094	320.1223740555711	0.18970110412570107	0.1994564997617369	0.951090109133123	0.3415586352445915	0.9826737213166676
Shkbp1	98.09641455105722	0.06766172550197512	0.19549308584744585	0.3461080232513969	0.72926153396297555	0.990650758600675
Cct8	2202.3612334358522	-0.21842956265848676	0.15559691295743805	-1.4038168142721184	0.1603734056805681	0.959550401625027
Snx14	603.1976634779045	0.22213451021957767	0.19855203815254707	1.118772248758848	0.263237313653298	0.9790994683758689
Ubxn8	99.37244067470436	0.05227312447730538	0.22203502150232987	0.235427384939618	0.8138770332012606	0.9932301794244984
Nrarp	34.423600500111924	0.02210028540572708	0.3312449002903321	0.06671886989462011	0.9468055117795626	0.9969498598140254
Vhl	526.7637919355575	-0.09789724378796152	0.1869686526193427	-0.5236024457387229	0.6005550800670907	0.9858063125051496
Minpp1	657.4265613698017	-0.10017906224892015	0.15735725578034146	-0.6366345279226422	0.5243629292308055	0.9827898691553396
Zfand5	3472.6230857292703	-0.13966507625509214	0.18752626937142164	-0.7447760610992916	0.45640710897752507	0.9827898691553396
Rars2	273.1315467532486	-0.08715156640326663	0.19967569048115957	-0.43646558173034	0.6624989657915357	0.9905110955795501
Uhrf1bp1l	1493.355564269467	-0.1330440620652593	0.20050552543637534	-0.6635431206980726	0.5069827721510735	0.9827898691553396
Akr1a1	5901.285464250222	-0.10034315494187816	0.14710981205717363	-0.6820969555917874	0.49517764554118365	0.9827898691553396
ENSMOCG00000003125	1285.0040895666723	-0.030141464951506925	0.1847083479780714	-0.16318409688275337	0.8703734872165195	0.9937217263181438
Sowaha	482.67210568474616	-0.37786331759479524	0.38397498478038666	-0.9840831631542691	0.3250746245949409	0.9808680905137676
Otud6b	1444.6451576556483	-0.09288650386406605	0.18738222570073906	-0.4957060549190589	0.6201018145099109	0.9870832312028577
Calr	3746.088479369107	0.019406837383450646	0.25897194775110804	0.0749379905892437	0.9402640494036338	0.9969498598140254
Ostc	231.94999966358327	0.1327346261883435	0.2160572797427417	0.6143492426933725	0.5389845689867936	0.9827898691553396
Slc4a2	327.77159060998747	0.4712063135016729	0.3069064496093409	1.5353418414682005	0.12469988143993004	0.9499749761956479
Abhd12	1118.852971919956	0.07235801777091891	0.20525900253350177	0.3525205563595626	0.724447904912049	0.9905110955795501
ENSMOCG00000003135	82.57948374148184	-0.07164728028478888	0.2795888857018033	-0.25625940067304603	0.7977505443138546	0.9932301794244984
Sf3b2	2697.66107577817	-0.18528284977782147	0.09439512620410377	-1.9628433927531146	0.04966437398601905	0.8896038645099562
Gabrg2	1372.6765289037955	0.4051126530306924	0.26589415558960416	1.5235861507838697	0.12761212491607646	0.9512476035538877
Tmem74	82.60752337637624	0.02034419255726206	0.3642644465487395	0.055850063738075946	0.9554612520565835	0.9980182914567937
Prkx	67.85701353542173	0.18118086869235064	0.26517471698490974	0.683250917555089	0.49444830318098326	0.9827898691553396
Sdr39u1	595.8547426704105	-0.010925225085771923	0.16762093817891652	-0.0651781645208934	0.9480321463427607	0.9969498598140254
Dhx37	217.06086741256016	0.06591960717465235	0.1615801995378033	0.4079683486170581	0.6832969123461644	0.9905110955795501
ENSMOCG00000003144	296.9720199116563	0.32658168203896965	0.19536560222817112	1.671643719847616	0.09459459817931783	0.9274490592602745
Ankrd34a	1681.3944417105401	-0.2938847401839455	0.20802415286302858	-1.4127433576304524	0.15773119816038922	0.957385388462856
ENSMOCG00000003152	1258.431521463689	-0.13849523638500477	0.3090465309137223	-0.44813716554439825	0.6540542070390838	0.9905110955795501
Exoc8	227.03966233097174	0.17101911111353046	0.24987548526376346	0.6844173246247273	0.4937116792536955	0.9827898691553396
ENSMOCG00000003155	1384.8688780411953	-0.03275743165242878	0.13897976423240585	-0.23569928926955788	0.8136660214388773	0.9932301794244984
Uprt	187.75886530819804	0.18950961073225778	0.21875929482717058	0.866292839725867	0.38632959190074606	0.9827898691553396
Prepl	4073.1874684651784	-0.13144385216150695	0.3172460811389318	-0.4143277410696955	0.6786341001755432	0.9905110955795501
Ints6	544.579341550484	-0.0603575523337152	0.15223405803533055	-0.39647864027711455	0.6917519621659982	0.9905110955795501
Nfat5	829.9605313471571	0.43092598586891573	0.22515774294376303	1.9138848179720243	0.055634874683879884	0.8896038645099562
Mapk14	1528.8644821631726	-0.15563366024646658	0.11328544497128042	-1.3738186779945303	0.16949798102319943	0.9616795126262409
ENSMOCG00000003171	926.3337798743073	-0.05972200461772712	0.11740103354733401	-0.5087008420044979	0.6109619321207397	0.9867514538040189
ENSMOCG00000003172	3240.249124559085	-0.057027632638456005	0.17322279591343034	-0.3292155188798366	0.7419927937861934	0.9917339364363256
Prnp	5542.728626159719	-0.0642722384643956	0.2271725873926255	-0.2829225092784325	0.7772362393251383	0.9932301794244984
Stam2	314.75717453884903	0.15630156110578572	0.20353045503671935	0.7679517106056046	0.4425158742781195	0.9827898691553396
Pigl	221.11251566593106	0.07225652032284063	0.16924780159054173	0.4269273789307443	0.6694322230070349	0.9905110955795501
Fzd4	31.20003919161169	0.3263506952564364	0.38548798206427337	0.8465911012551959	0.3972230756758204	0.9827898691553396
Farsb	1382.411873551409	0.1315619015241005	0.1888789094407104	0.6965409844522537	0.4860900999000049	0.9827898691553396
Iqcg	92.3840019988109	0.12573813975704629	0.3469133830520657	0.3624482245419029	0.7170171077264652	0.9905110955795501
Med30	203.80986606309332	-0.29073042817017736	0.22760129006972574	-1.277367224417366	0.20147263040836522	0.9681356118033208
Golph3	517.8986594752272	-0.05005731319520308	0.12910605479126797	-0.38772242925502737	0.698221455586999	0.9905110955795501
Zfp36l1	431.9611570336933	-0.006292003681074624	0.3188535687377478	-0.01973320764758227	0.98425620006077	0.9991581039407021
ENSMOCG00000003190	39.585410897242994	0.15014149567965282	0.33805338935257584	0.4441354543647583	0.6569446546533069	0.9905110955795501
Lrrk2	970.5743340260751	-0.6797804742634665	0.32621435789890457	-2.0838459675466945	0.037174180530762636	0.8842741452865222
Map4k4	1649.578044291409	0.053751439381255935	0.12407847002286708	0.43320520773144444	0.6648656958737345	0.9905110955795501
Ldlrap1	53.41685260431707	0.6121105566573664	0.358851724237606	1.7057478488025055	0.0880550367018484	0.9246160044329155
ENSMOCG00000003198	104.66913540306857	-0.06279463997927393	0.2042404489944534	-0.3074544748037606	0.7584974697609035	0.9929003536530008
Atp6v0a1	4534.735787859488	0.07746964271201101	0.23696316001785211	0.3269269480799238	0.7437231384276499	0.9918185902200896
Rnf182	67.19135048465408	0.39068644835405125	0.26952054019335425	1.4495609428274836	0.1471809941775514	0.9564021971810307
Tvp23a	159.06519181734427	0.21539638472201	0.3097084523294627	0.6954811310505498	0.48675383213276713	0.9827898691553396
Mblac1	52.16514748161826	-0.039277882915727945	0.24985794541718037	-0.15720085607102402	0.8750865536430753	0.9937217263181438
Akip1	128.10677698438673	0.21160772824096577	0.2449876441381984	0.8637485738733709	0.3877260237577364	0.9827898691553396
Gga3	732.1398179877301	-0.042093763351059243	0.1744903570931264	-0.24123833575854042	0.8093704004614859	0.9932301794244984
ENSMOCG00000003210	4081.515402937229	0.015275741104604697	0.4074725499509001	0.03748900657589181	0.9700951054680718	0.9983627149610678
Psmd14	1094.0549878206707	-0.02492932786878048	0.12153540111492651	-0.20511988803333742	0.8374784583839623	0.9932301794244984
ENSMOCG00000003212	4650.653345913958	-0.08761914457834638	0.25343550780074897	-0.3457256062446962	0.7295489385903715	0.990650758600675
Mau2	732.008859139638	-0.0065850700839850075	0.1375830858962619	-0.04786249734905766	0.9618258278974463	0.9983627149610678
Lgi2	208.66747847867026	0.597811333288179	0.31974447679402973	1.8696533534597128	0.061531971097899846	0.8911089989335398
Ptbp2	1642.278918522566	0.04351232180901658	0.22055719460146464	0.19728362018587098	0.8436055966522511	0.9937217263181438
Igfbp5	273.9544849017622	0.26304111343718456	0.27038390838124815	0.9728430771341982	0.330631299450289	0.9808680905137676
Tmem39a	132.72900254880153	0.262276275628598	0.28337021710822513	0.9255604851671095	0.3546744366957075	0.9827898691553396
Rasgrp2	781.4549506947116	-0.34721760276082875	0.35747853277468156	-0.9712963742627861	0.3314007137922354	0.9808680905137676
Hspa1l	46.42771338237652	0.1564423368297022	0.3222595896884378	0.4854544033304065	0.6273540492750551	0.9895369891543592
Ttc27	403.15191703830004	-0.24211801743583622	0.17450194926504975	-1.3874803029740654	0.16529535323855304	0.9612067070935637
Nol9	712.4947144355414	-0.15894261397212261	0.1281720772131061	-1.2400720767586193	0.2149487359809846	0.9760008498604946
Clcn3	2363.3809542841905	0.1301313284788777	0.17457054095997082	0.7454369320463808	0.4560076243139039	0.9827898691553396
Zfp382	309.107880347954	0.07781050787169859	0.2007546912128886	0.3875899855769004	0.6983194810688225	0.9905110955795501
Homer1	907.3024233947983	-0.1641417300290044	0.32263626839488135	-0.5087516380151901	0.6109263221642489	0.9867514538040189
Nubp1	444.7120621538173	0.06666028603797423	0.2224746318436662	0.2996309533610856	0.7644586709820991	0.9932301794244984
Junb	479.19256227333585	-0.8307807949819402	0.4162193529648574	-1.996016737482376	0.045932100979663784	0.8854355124960115
Rufy1	515.6664213095881	-0.16009129244998846	0.1719612859720463	-0.9309728730222022	0.35186759657539035	0.9827898691553396
Ndufb8	2108.3287806028175	-0.082371141284497	0.17905036391752924	-0.4600445342989486	0.6454842549731051	0.9905110955795501
Vwa5b2	524.9178319974093	0.7704757854947997	0.35929977866288754	2.1443814643083803	0.032002334208530665	0.8841458178596813
Dnajb4	1016.3534691417094	-0.14197136690223272	0.16613852829978729	-0.854536081155442	0.3928080264715047	0.9827898691553396
Cox4i1	3036.5249549229306	0.011433514202927497	0.1415297027806856	0.0807852625865036	0.9356127285111401	0.9969498598140254
Rsph1	92.14958651604029	-0.24539644108466804	0.3917815590746155	-0.6263603668949917	0.5310785991881581	0.9827898691553396
Cln5	195.17149829312064	0.28840409122006855	0.18020796199467326	1.6003959427086436	0.10951077462668594	0.9402330488920683
Tmem205	152.7451618572856	0.057686035485082124	0.25995557054245955	0.2219072873287785	0.8243860574916314	0.9932301794244984
Rspry1	295.6710203620723	0.10116699906725062	0.14041662840603594	0.7204773410077254	0.4712311460066693	0.9827898691553396
ENSMOCG00000003263	694.1949393094874	-0.13652009907666735	0.19382256563544836	-0.7043560620977513	0.48121106134279357	0.9827898691553396
Mmp24	263.78374481145295	0.08858854627133352	0.16892167797653013	0.5244356279934773	0.5999755815740483	0.9858063125051496
Atp6v0e	119.78689507783203	0.1036601206356939	0.20331853508600617	0.5098409773208548	0.610162875018434	0.9867514538040189
ENSMOCG00000003271	229.38315258024778	-0.047905695346331545	0.2667429331196287	-0.17959499352452132	0.8574705353644397	0.9937217263181438
Wdr61	671.0078882670547	-0.15318482273321807	0.10638857167020098	-1.4398616348387778	0.14990654923044255	0.9564021971810307
Madd	2356.7314140393964	-0.036082599460218155	0.1913563715381256	-0.18856231005106147	0.8504358750400595	0.9937217263181438
Kcmf1	914.2021693412756	-0.009274172547413374	0.09834387613222512	-0.09430350838464087	0.9248680630496533	0.9969498598140254
Ctps	1888.3644698213525	-0.014871020891942827	0.16249467859300243	-0.09151697163689904	0.927081821408499	0.9969498598140254
Htr1a	70.25527656145573	0.22476762491459354	0.4017789747478754	0.5594310281060373	0.5758675904478407	0.9852153260815123
A130010J15Rik	30.75485843396488	-0.06338102858355954	0.35452519293875223	-0.1787772204795309	0.8581126325277176	0.9937217263181438
ENSMOCG00000003289	49.58041346997128	0.0804427737115528	0.36002928786068167	0.22343397169032883	0.8231977669551622	0.9932301794244984
Ccser1	114.60416017088512	0.11607750995125883	0.24736824316459677	0.4692498457614134	0.6388910601899278	0.9905110955795501
Zfp871	323.2000276490352	-0.037692771722975735	0.2716003071256973	-0.1387802986008091	0.8896237627550055	0.9954333909839311
Unc13a	3776.746480451858	0.10640397975967802	0.15804168772041327	0.6732652712992667	0.5007785426741426	0.9827898691553396
Miga1	2227.5240410423	0.03903631130104251	0.15559892180937043	0.2508777750328324	0.8019086079589001	0.9932301794244984
ENSMOCG00000003303	248.274767372526	-0.06042529583910523	0.21517465914889392	-0.28081975860035113	0.7788486480188356	0.9932301794244984
Adcyap1	99.85254763376874	0.8638628017305192	0.5546822215952333	1.5574012796842502	0.11937524251968093	0.9446087516488444
Ccdc71	461.1363996359441	-0.17546394166244714	0.12202119981566109	-1.4379791538480415	0.1504399690225012	0.9564021971810307
Zkscan1	793.1046795550255	-0.0268877760882548	0.17215560311259406	-0.15618298563695035	0.8758887876465777	0.9939168414943764
Dnal4	497.6281375330559	-0.22234951035497855	0.22019014042127225	-1.0098068420755577	0.3125878414552148	0.9790994683758689
Cdc45	31.49928743919637	-0.14741173143670147	0.3408627051360958	-0.43246658908561025	0.6654023302066879	0.9905110955795501
Chchd1	339.07289101599275	-0.08373977030102651	0.20024338996209187	-0.4181899353425814	0.6758082538336734	0.9905110955795501
Ttc22	23.90723459296307	-0.30084969122824246	0.4090147024661116	-0.7355473762050619	0.46200619802600085	0.9827898691553396
Ptprt	393.56131907647085	-0.06990211820889358	0.3041580908045756	-0.22982166288585215	0.8182303506906977	0.9932301794244984
Eri1	230.39188460024033	-0.21234945107103564	0.17230168952130004	-1.2324281419468315	0.2177891938635925	0.9772502793407158
Sh3rf1	405.71455972831416	0.04923292331115687	0.2561067025413994	0.1922359814194961	0.847557362380882	0.9937217263181438
Pard6b	43.42295419939832	-0.6011099932733095	0.29739527585984166	-2.021249300397779	0.04325396456875175	0.8854355124960115
Tmem215	78.78857178950769	0.35549448489797586	0.3905621866266545	0.9102122455029154	0.3627105873910964	0.9827898691553396
Gnptg	368.2290165579518	0.1490528488459347	0.2149724515301712	0.6933579060246018	0.48808497182621535	0.9827898691553396
Kif3b	1290.0207029685976	-0.03557528858149757	0.1628292107261376	-0.2184822270085902	0.8270534046371067	0.9932301794244984
Dnali1	220.48850018288857	-0.3180736896551701	0.2801802667582251	-1.1352465801228042	0.25627201777695036	0.9790994683758689
ENSMOCG00000003330	72.84073596231039	-0.004676258616009882	0.2998096417213204	-0.01559742571707072	0.9875555594140647	0.9991581039407021
Rnft1	144.69713539948032	0.011050486709572538	0.2850248275082588	0.03877026014252159	0.9690735559681283	0.9983627149610678
Gabbr1	4967.4366391279	-0.13637639084577913	0.1941567895741234	-0.7024034088373438	0.4824276200425355	0.9827898691553396
Pde6d	489.72262166134374	0.022606810918245596	0.11858535861299348	0.19063745459524672	0.8488096437793099	0.9937217263181438
Bend5	226.58116272335062	-0.07737603261438206	0.2695955589264535	-0.2870078161617287	0.7741063354716072	0.9932301794244984
Atp6v1c1	3411.018408832897	-0.18731914199740554	0.17450225545552753	-1.0734482572068786	0.283070042568331	0.9790994683758689
Irf5	105.25721861046405	0.17893603900270222	0.2666963395411535	0.6709354890680488	0.5022616269107729	0.9827898691553396
Cdk5rap2	216.00041071360175	0.06516696769971031	0.20832174932213735	0.31281883870387284	0.7544183019690026	0.9923968896676919
Epc2	997.4709436849305	0.059530823954496395	0.2120802131291606	0.2806995668107947	0.7789408410336027	0.9932301794244984
Jmjd1c	1208.7106713090575	0.10536066076565577	0.13329373554668958	0.7904397032128376	0.42927102293034186	0.9827898691553396
Kcna1	2787.144247405103	-0.0974179940483091	0.19540733066665478	-0.49853807283460816	0.618104841129635	0.9870832312028577
Stc1	56.4277271086006	-0.1676693429227593	0.2789417304422059	-0.6010909255382957	0.547779427079879	0.9845783140470524
Coq8b	351.84694981691666	-0.06814973650770952	0.17667372847491797	-0.38573780661104123	0.6996908600742685	0.9905110955795501
Pcsk6	133.47441467566972	0.8538634527430214	0.356656761052292	2.3940761706682756	0.016662288073755173	0.8796473849899012
Rnf14	1820.3314904035344	0.14731701975625036	0.17825861496977155	0.8264230022275886	0.4085641795248087	0.9827898691553396
Hacd1	54.52364223240657	0.41803815280464257	0.33262385478434525	1.2567894538883124	0.20882988586803777	0.9728716713013718
ENSMOCG00000003369	359.1818932530769	0.18733756961905654	0.19131881333749912	0.9791905268018812	0.32748584847567025	0.9808680905137676
Syncrip	1124.3505054728814	0.08117141759162311	0.1794592656976082	0.4523110984327679	0.6510448816990535	0.9905110955795501
Garem2	123.42952059126026	0.1848898555196726	0.27510085502903103	0.6720802648910758	0.5015325995144295	0.9827898691553396
Aggf1	1207.6018422350426	0.027275495033749333	0.1650375934629572	0.1652683758980728	0.8687327488855962	0.9937217263181438
Gfer	106.64346217572707	0.1819792529302391	0.21179690401780651	0.8592158311952447	0.3902214507106396	0.9827898691553396
ENSMOCG00000003380	969.5107164275804	-0.07296398735409795	0.13854980904536923	-0.5266264014135545	0.5984530541693612	0.9858063125051496
Sgpp1	169.12465814500166	0.38482809926135475	0.19349899890695282	1.98878599597513	0.04672482915546235	0.8854355124960115
Cxxc4	78.78245477604418	0.06945281131980131	0.30109759532802	0.23066544667730884	0.8175747192108804	0.9932301794244984
Uchl5	364.92570012679244	-0.08911577193479268	0.1971774456562387	-0.451957228871694	0.6512997952230146	0.9905110955795501
ENSMOCG00000003394	303.33479404887004	-0.27139310445070247	0.16240144955660343	-1.6711248895356139	0.09469701211544791	0.9274490592602745
Poc1a	37.08205463956307	-0.13742203596761468	0.28972545151412477	-0.47431813549495855	0.6352730609445546	0.9905110955795501
Ncstn	590.7791857341489	0.09917612748079148	0.15712219099681848	0.6312038220164564	0.5279072632544213	0.9827898691553396
Chmp2a	1086.2001680196165	-0.13673793080373792	0.11280555364153466	-1.2121560188273517	0.22545266351199647	0.9790994683758689
Fam114a2	344.08441945082626	-0.1707470159462584	0.1598863585847299	-1.0679273545139438	0.28555328222952686	0.9790994683758689
ENSMOCG00000003409	93.64274157103299	0.001196193454851592	0.2422455913643652	0.004937936942895195	0.9960601123622443	0.9995554716927965
Sall2	1324.2951288850988	-0.087479046444379	0.13580858832510248	-0.6441348630689626	0.5194879848698681	0.9827898691553396
Rrp9	173.1193832263429	-0.021205447303535144	0.1510997417394643	-0.14034072500334854	0.8883907888026694	0.9954333909839311
Nup88	714.6373562497881	-0.060666768736022815	0.11628750726558831	-0.521696355546313	0.6018817625650581	0.9858063125051496
Mdh2	4623.671419887078	-0.25534057317461784	0.13122369211102092	-1.9458420127257863	0.05167372023914476	0.8896038645099562
Nr2c2ap	193.87686340215265	-0.25083789465474177	0.19301678270634115	-1.2995652043188939	0.19375003193765583	0.9672440546260765
ENSMOCG00000003424	49.095283931712686	0.9299216396652091	0.32213801551399224	2.8867180987051726	0.003892828420400478	0.7243824912673226
Hmgn3	641.8689113192843	0.032915027700261466	0.2779596667459206	0.11841656052332468	0.9057376046988178	0.9961191772170136
ENSMOCG00000003429	1759.6097746998942	-0.07739470026659287	0.10898666353462051	-0.7101300081730441	0.47762351915863777	0.9827898691553396
Mxd1	434.78444240407606	-0.05934931906788747	0.1489014474310644	-0.39858120986610224	0.6902018090940844	0.9905110955795501
Rapgef1	1833.2581600353292	-0.14926535810083763	0.11865124676533138	-1.258017611867618	0.2083853869549505	0.9724116864138669
Cep68	239.7230385161573	0.05046858029384493	0.16874103748971644	0.299088953372831	0.7648721746666806	0.9932301794244984
Sec24d	62.70918034670401	-0.009513409623813775	0.28871245601728523	-0.032951157546331176	0.9737135370998761	0.9986064803838273
Thumpd1	966.7375433417046	-0.2083483456587107	0.1253491644640074	-1.662143872674441	0.09648393066131904	0.9301508283691331
Tmc7	104.99302205356972	0.44570512381931093	0.27149794080324724	1.6416519495531294	0.10066215498771514	0.9347323746186648
ENSMOCG00000003452	3176.9332933108776	-0.10300917335238126	0.12346618794450409	-0.8343107944555808	0.40410587061377673	0.9827898691553396
Prxl2b	83.60563312029517	0.0290906939879983	0.25107958576724243	0.11586244217786053	0.9077615619732257	0.9961191772170136
Eid1	1596.1201119179793	-0.12791827262161892	0.1330846947241563	-0.9611794420594661	0.3364619511605253	0.9808680905137676
Twistnb	261.48721108376543	0.09818477094631589	0.19821232405339886	0.49535149449064875	0.6203520276343699	0.9870832312028577
Usp21	508.8130753723001	0.04259158436645619	0.11056334209722635	0.38522338017787416	0.7000719226308053	0.9905110955795501
Adsl	416.7108377699028	-0.0672038324302678	0.11235581416892676	-0.5981339989155074	0.5497505261433354	0.9848857854361492
Ccdc6	1376.3376965255748	-0.22478795310402516	0.21077584570504446	-1.0664787151113557	0.2862072954412066	0.9790994683758689
Herc2	2532.4024498999884	0.14438116165519932	0.22040252020458592	0.6550794497321505	0.512416602414423	0.9827898691553396
Six3	273.1948263850153	-0.523556536811279	0.3285135107640716	-1.5937138645943891	0.111000137435749	0.9402330488920683
ENSMOCG00000003471	188.0212998555053	-0.15808159266146238	0.2568493104443244	-0.615464345175763	0.53824810891229935	0.9827898691553396
Trip6	74.27405509826728	0.17416274028180115	0.3133405888283131	0.5558256622069129	0.5783300406016714	0.9852153260815123
Dhx15	1614.993223463113	0.024802073122290262	0.10175034197079928	0.24375419916925745	0.8074211942311037	0.9932301794244984
ENSMOCG00000003477	178.00412381239323	-0.09488894361182999	0.23058667838865762	-0.41151095230182	0.68069791201621	0.9905110955795501
ENSMOCG00000003481	1400.338267539164	0.10642418109274845	0.22369226975849918	0.47576155048918434	0.6342442651532124	0.9904860221192583
Ccdc84	156.9897052671694	0.13110220941993972	0.3732102363247293	0.35128245867797686	0.7253764534069869	0.9905110955795501
AW554918	74.91963993122582	-0.15232807085875288	0.2460841891789774	-0.6190079556389722	0.5359111179155968	0.9827898691553396
Rpl21	2307.786708364012	-0.011617429952377495	0.21603390071738082	-0.05377595791123362	0.9571136646033259	0.9983454252037803
Prkca	519.3934947733139	0.054055517309440346	0.34659122012543864	0.15596331981484274	0.8760619338998499	0.9939168414943764
Smap2	4759.25698353001	-0.14795266488513048	0.1308118738553706	-1.1310339078905882	0.2580408200433773	0.9790994683758689
Bmt2	492.57864614349756	0.06931527385928796	0.19368975370061806	0.3578675305996157	0.7204424504792881	0.9905110955795501
Disp1	146.6410981842952	0.3831319358480645	0.19602217069818362	1.9545336860796974	0.05063813508973825	0.8896038645099562
ENSMOCG00000003508	56.63081343707029	-0.5055987837146321	0.30674297959230074	-1.6482815169450178	0.09929491575699664	0.9347323746186648
Soga1	508.700111112601	0.3873245792100055	0.2613095298949439	1.4822443688361628	0.13827528475805834	0.9564021971810307
Bloc1s2	284.28032882527697	-0.05448341461611511	0.1865795611057615	-0.29201169888716544	0.7702776792033714	0.9932301794244984
Mfsd10	205.68350303318948	0.4233772012441061	0.36788454369354684	1.1508425904318107	0.2497969995390355	0.9790994683758689
Pou3f2	167.88494899744921	0.34344117690297365	0.29105690823152985	1.1799794720205479	0.23800837952534337	0.9790994683758689
Dlgap1	4481.379345825796	0.09843987473951867	0.35750703478338347	0.2753508747014285	0.7830466820633348	0.9932301794244984
Bin3	244.48853054874007	-0.09119858338208744	0.14686274026539062	-0.6209783585495247	0.5346138624722704	0.9827898691553396
Agk	415.03366507654704	-0.01514550768865635	0.14321660775602196	-0.10575245375492782	0.9157787615703391	0.996861371236916
Lmo2	124.05367082591596	0.12625109134488952	0.3286334582120109	0.3841699260683351	0.700852506759842	0.9905110955795501
Dnajc30	386.36301815683845	-0.08486593029896074	0.13774933753040988	-0.6160895712491214	0.5378354046321413	0.9827898691553396
Tmem178	361.47462886755807	0.17275770649544045	0.5319879078829325	0.324739912196382	0.7453779247768133	0.9918185902200896
ENSMOCG00000003543	1048.6690596002015	0.19716552183294286	0.18808551120945802	1.0482759706747058	0.29451147733260147	0.9790994683758689
Pigc	259.91991312888524	-0.043766659397628783	0.13950876844770072	-0.31371977463937045	0.7537338804806345	0.9923968896676919
Itih3	120.89390748114167	0.39281921678112813	0.3899897969740502	1.0072551123876357	0.3138121946792639	0.9790994683758689
Nbdy	178.0077600782112	-0.18435712380712554	0.2027715999751584	-0.9091861179263329	0.3632518906643631	0.9827898691553396
Stard3	194.23737189460323	0.16781050222607036	0.2760758530347209	0.6078420129157965	0.5432922617584781	0.9835123935726917
Htra2	283.1570057904184	0.0591220382361773	0.14611838684944947	0.4046173757522567	0.6857587843134312	0.9905110955795501
ENSMOCG00000003557	257.7170609573841	0.2504417759816302	0.239197074380583	1.0470101970526442	0.2950948752055454	0.9790994683758689
Cdh2	854.3556622108375	-0.025362136461533624	0.22137778590958998	-0.11456495672014465	0.9087899572544549	0.9967138849505954
Srp14	1002.983586203291	-0.03574094270934255	0.14450774730258298	-0.2473289036504391	0.8046536916163517	0.9932301794244984
Tardbp	2516.9480651582894	0.21349417147501165	0.1619266404561773	1.3184623041246275	0.18734893597385902	0.9672440546260765
Glra3	60.98566569875087	0.7445423463160048	0.4682972617623489	1.5898925898350533	0.11185901826126367	0.9402330488920683
Ccdc148	104.15495719574128	0.1333252691335163	0.4462279410566259	0.2987828794804166	0.7651057147800334	0.9932301794244984
Akirin1	1247.0278223317687	-0.02550172464650157	0.12428726382485512	-0.20518373211947485	0.8374285789400814	0.9932301794244984
ENSMOCG00000003569	203.47784705212442	0.020525018419799042	0.21577526345025874	0.09512220303478179	0.9242177625657859	0.9969498598140254
Megf11	232.51050595331935	0.5664711589944593	0.302732546564519	1.871193452514138	0.061318271975536645	0.8911089989335398
Vegfa	628.5356389455559	0.6202086368869001	0.38153060361571983	1.6255803099653268	0.10403896668309234	0.9402330488920683
Wdpcp	141.829861112215	0.040505429710608984	0.1851872342248973	0.21872690026472286	0.8268627929437917	0.9932301794244984
D17H6S53E	141.43192295007532	0.09604083834067713	0.21373191889652499	0.4493518742381844	0.6531778423246077	0.9905110955795501
Cds1	282.89779959886306	0.16836107097267408	0.26207529756776904	0.6424148805140181	0.5206038404454892	0.9827898691553396
ENSMOCG00000003587	443.71501699659655	-0.15288248184192296	0.5780897361156985	-0.26446150535238905	0.7914243234301946	0.9932301794244984
Tspan2	440.94476040493964	0.14243389918902802	0.2464400540614091	0.5779657033898218	0.5632872745182457	0.9852153260815123
Spry3	100.51007094278312	-0.08731182406405545	0.29456572675086934	-0.2964086318769187	0.7669180340780831	0.9932301794244984
Rtkn	446.1152124036476	0.3889380110872995	0.3186284766647745	1.2206630592421808	0.22221361986640645	0.9790994683758689
Rnf19a	897.2645150645849	-0.1840352227208263	0.14524262228850165	-1.2670882680379403	0.20512373002370943	0.970731939942315
Ypel3	1781.3321339777272	-0.1529915449607978	0.10140782074596576	-1.508675995947622	0.13138160270463486	0.9564021971810307
Slc38a2	1694.7804102159607	0.5001763744236891	0.19722711780300542	2.5360426091267825	0.011211309200595211	0.8290899877123094
Mrpl16	430.88629910792827	-0.11120849520814557	0.12296822453104186	-0.9043677391639684	0.3658004386802311	0.9827898691553396
Fcsk	243.10059056414025	-0.3325174290061053	0.27422697503748333	-1.2125628011637237	0.22529701828625012	0.9790994683758689
Maz	1498.7694722741503	-0.010585431931185165	0.1032857530248669	-0.10248685439352545	0.9183702465799126	0.9969498598140254
Fam172a	416.9930522355409	-0.033654987121280976	0.1962576282431369	-0.1714837146589123	0.8638434345913604	0.9937217263181438
Msh2	548.7671583956029	-0.16637540407896564	0.17582802378545911	-0.9462394019850481	0.34402649341780583	0.9827898691553396
Csrp1	4442.421975497988	0.4051552770658647	0.28016926254585584	1.4461089463714891	0.14814664683702602	0.9564021971810307
Resf1	481.93940995610717	0.481927529621397	0.22900690391083944	2.104423584579042	0.035341513906774806	0.8842741452865222
Mocs3	89.81802283483272	-0.267000250160503	0.1862377735804143	-1.4336525025371227	0.15167145284569372	0.9564021971810307
Npl	27.70574025810021	0.34486700773290363	0.3752709322633262	0.9189814027240238	0.3581052996514527	0.9827898691553396
Tsc1	1634.0763103545055	-0.028249668558448137	0.10313766156355374	-0.27390255053475887	0.7841595114752433	0.9932301794244984
Ccdc115	471.19081112048076	-0.3115291082439639	0.19411305806701873	-1.6048848611534756	0.1085191457648034	0.9402330488920683
Dnajc24	80.65898516511776	-0.2756278697332885	0.22501073013221606	-1.2249543369390867	0.22059242574231508	0.9790994683758689
Plcxd3	390.6744752633437	0.25906473894234594	0.3089849098629051	0.8384381588644297	0.4017846658466343	0.9827898691553396
Prxl2a	970.4347345511842	0.18198196984466558	0.21095046856153235	0.8626763006766353	0.38831546611694473	0.9827898691553396
Ism1	69.18642963383351	-0.2728312850347158	0.23031856969450595	-1.1845822305886957	0.23618266614263053	0.9790994683758689
Mtpn	6534.447765328141	-0.06917392171303532	0.2280931789993563	-0.3032704529635695	0.7616837616245203	0.9932301794244984
Dynll2	11845.061864844109	-0.1464574608518993	0.13408316473347162	-1.0922882163694831	0.2747064380863712	0.9790994683758689
ENSMOCG00000003655	76.73249484598081	0.22061125621731317	0.22869467160402143	0.9646541157692363	0.3347180845682275	0.9808680905137676
Grina	3077.7669067954253	0.05129832677610705	0.2322667741933432	0.22085951361000675	0.8252018224099951	0.9932301794244984
Spast	351.6808002948496	0.19770079975494023	0.14955767077595988	1.3219034418575537	0.1862003061691513	0.9672440546260765
Syap1	546.6946101567138	0.08170479869716901	0.24674711877501762	0.3311276707213222	0.7405480512976128	0.9914566743662293
ENSMOCG00000003664	790.5104088301707	-0.06163730975626419	0.11017228104163061	-0.5594629535987677	0.5758458075966995	0.9852153260815123
ENSMOCG00000003665	36.705306880458444	-0.19159672534831967	0.33777770238539995	-0.5672272740185506	0.5705597801504667	0.9852153260815123
Mccc1	335.901724783073	-0.04225331345494679	0.18896541742550868	-0.22360341924258867	0.8230659028619448	0.9932301794244984
Ikbip	72.65453819526147	-0.1823015983421479	0.27944835646402955	-0.6523623922820018	0.5141674192195801	0.9827898691553396
ENSMOCG00000003676	462.1642538847162	-0.2566543314309746	0.27396849745461954	-0.9368023470416964	0.348860237804217	0.9827898691553396
Ifngr1	156.9968924489918	0.18281869053132468	0.2860348498227841	0.6391483088322697	0.5227264555722406	0.9827898691553396
Kpnb1	2621.528187864513	0.011975064474443848	0.12783726685377397	0.09367428426126684	0.9253678986199316	0.9969498598140254
Insyn1	1973.0453458558568	-0.11700020112548772	0.195817720782886	-0.5974954700612226	0.5501766304950035	0.9848857854361492
Tarbp2	245.23791918142	-0.0023374144714746123	0.1561968418927605	-0.014964543733089062	0.9880604672158968	0.9991581039407021
Zfp354a	90.45592764358643	-0.08011484556689571	0.25471883559594133	-0.31452265938425267	0.7531241093283148	0.9923968896676919
Ddx47	521.1661796889753	-0.04296121396435566	0.13047298658036524	-0.32927286398777705	0.7419494529488373	0.9917339364363256
Gpr165	250.0162395735804	0.5804828432909194	0.6453932328476366	0.8994250539778418	0.36842629916440733	0.9827898691553396
Eif2b2	771.0911446213279	-0.16289741556483264	0.08903344165479438	-1.8296205620852888	0.06730669685057429	0.9002990712532849
Pgm2l1	1289.4067816372717	-0.18323347010860117	0.38564190515021435	-0.4751388987076715	0.6346879744456186	0.9905110955795501
Chek1	49.15966989637843	0.1796979645622711	0.2831497551612693	0.6346393075986355	0.5256636855577288	0.9827898691553396
Ado	110.42860861936602	0.2629893660501431	0.2743654213304538	0.9585368475912677	0.33779212013554166	0.9808680905137676
Dcbld2	758.1435949418857	0.12366567994582092	0.19958481507926473	0.6196146730737373	0.5355115041248986	0.9827898691553396
Pnma2	2145.539333458858	-0.14709119637981932	0.2373007884020172	-0.6198512755491922	0.5353557068596533	0.9827898691553396
Rab4b	739.1310830200389	-0.006381726146558463	0.12437587957051104	-0.0513099981169624	0.9590785012550952	0.9983627149610678
Slc41a2	137.86081395538812	0.11768588315800732	0.29434831579517823	0.3998184356519262	0.6892902510907132	0.9905110955795501
ENSMOCG00000003716	87.32479797874112	0.3872969161867868	0.39604283664220774	0.9779167311052209	0.3281155094267952	0.9808680905137676
Nelfe	510.1586259820072	-0.1506524126295161	0.15557223228859976	-0.9683759782404036	0.3328566319720961	0.9808680905137676
Hipk4	87.61767241840161	0.05461479560534698	0.3445673206114776	0.15850254025374846	0.8740608191337937	0.9937217263181438
ENSMOCG00000003726	96.37500449631985	0.11624712035603678	0.2745598879522771	0.4233944048529128	0.6720075264278094	0.9905110955795501
Kcnt1	1313.9815443028601	0.21672931667107725	0.26339236368833746	0.8228382692503763	0.4105999708914554	0.9827898691553396
1110038F14Rik	356.5066116226749	-0.24971971175349436	0.11949169896982462	-2.089849871634651	0.036631287781922324	0.8842741452865222
Med19	618.3282179446408	-0.2658547846470075	0.19164587804075933	-1.3872189027225799	0.16537502314690036	0.9612067070935637
Vps37c	356.616452188498	-0.07806649315582997	0.18268927207768237	-0.42731843127950536	0.6691474099315956	0.9905110955795501
ENSMOCG00000003735	62.99461908894651	-0.23797574960476747	0.28781310898910395	-0.8268412458369878	0.4083270486101448	0.9827898691553396
U2af1	706.7993837555755	-0.024394613951963538	0.1439873490225587	-0.16942192572863884	0.8654647785543993	0.9937217263181438
ENSMOCG00000003737	77.1356642571963	0.29581936537587067	0.30208299968107416	0.9792651876741943	0.32744896656495315	0.9808680905137676
Cnnm3	161.79878696200922	0.13600586611026946	0.1818693604069662	0.7478217650621923	0.4545676720571938	0.9827898691553396
Pxmp4	66.7137925734829	-0.0120659389460968	0.2221005568394074	-0.05432646868517862	0.9566750617264859	0.9983454252037803
ENSMOCG00000003746	64.00084691407656	-0.28449316076631687	0.21842130751270858	-1.302497288410216	0.19274644430984966	0.9672440546260765
Gsk3b	1496.68312390254	-0.03410288179864909	0.23774655578025783	-0.14344216969506549	0.8859409807007587	0.9954194263526446
ENSMOCG00000003749	68.75314452028712	0.09530454170229408	0.4309009940816151	0.2211750332705031	0.8249561484425691	0.9932301794244984
Mon1b	269.77043402421833	-0.07614456701067365	0.1692796142693441	-0.4498153386001846	0.6528435969346145	0.9905110955795501
Relb	77.24111086992225	0.2714550044177782	0.2535797830716709	1.0704915081540831	0.28439812929982683	0.9790994683758689
ENSMOCG00000003756	31.83291335544685	-0.2549228922502733	0.36797425515251386	-0.6927737163150605	0.48845156924918637	0.9827898691553396
Mef2d	3824.6637850240127	-0.18310249657746633	0.15843189104995986	-1.1557174213096204	0.24779675988517946	0.9790994683758689
Mtmr9	821.6164946824337	0.04641373562601586	0.24089683410427076	0.19267059195110034	0.8472169561141639	0.9937217263181438
Rab14	4464.671095195855	-0.012208559385832242	0.14095408609454818	-0.08661373163487486	0.9309785506554402	0.9969498598140254
Gfpt1	1975.7222377707342	0.058677256746744115	0.16117860976823703	0.364051140725917	0.7158198209541322	0.9905110955795501
Dhrs13	173.44172990262282	0.14949022397832148	0.30758295634201743	0.4860159540572708	0.6269558544414383	0.9895369891543592
Foxn2	77.6268808669758	-0.0014508058232981873	0.24367095725771432	-0.005953954626458696	0.9952494595952847	0.9993695517446276
Fam193a	836.8318874731261	-0.009702409622549913	0.1414046896635626	-0.06861448262878969	0.9452964905661415	0.9969498598140254
Map3k1	144.6542574947961	-0.08810880730748832	0.23346406663189803	-0.37739772367800467	0.7058780582791908	0.9905110955795501
Chchd5	137.9463234679698	0.2375701632227426	0.21394752388759333	1.1104132401530409	0.2668209953973206	0.9790994683758689
Fads2	1070.4621890138556	0.5231833564289384	0.21597389121191013	2.42243797846657	0.015416757155773645	0.8796473849899012
Ugcg	1172.811122242075	0.18789372818944006	0.22017333136238948	0.8533900405957	0.39344304264393454	0.9827898691553396
Lhfp	50.01121822214414	0.44086745952511625	0.3839072232905669	1.1483697955623982	0.25081593719096856	0.9790994683758689
ENSMOCG00000003783	79.67095478426474	-0.09204506110148106	0.2375602235924599	-0.38745990262825525	0.6984157642033816	0.9905110955795501
Atp5j2	1626.0697236330766	-0.0068232206041372685	0.15426435574819877	-0.04423070106534923	0.9647205100819447	0.9983627149610678
Ccdc184	172.10307094676088	0.08203847319784273	0.234007422879318	0.3505806447864327	0.7259029792471365	0.9905110955795501
Anxa2	122.22763070405844	0.5739528111718705	0.39354536865440437	1.4584158699016292	0.1447259489594826	0.9564021971810307
Sox1	131.5546055553839	-0.27432399411416947	0.30175999610064147	-0.9090800558688976	0.3633078693795611	0.9827898691553396
Dchs2	345.6838510053581	-0.47230046294648814	0.33560010804250245	-1.4073310813316935	0.1593292369730411	0.957385388462856
Adamts5	42.99800532361505	0.44799096428458723	0.31890255357978553	1.4047895172231832	0.16008387718027564	0.9582908501689945
3110082I17Rik	59.91889139039495	-0.4046354175806183	0.2534454337617826	-1.5965385983672586	0.1103685952682663	0.9402330488920683
Arih1	673.8239564698029	-0.09085964082746269	0.16770136816815254	-0.5417942728789106	0.5879602371856592	0.9852153260815123
Eif4h	4959.138716064201	-0.20794755934485817	0.12613253736967728	-1.6486432738238843	0.09922073780945342	0.9347323746186648
ENSMOCG00000003809	844.9559412450125	-0.013071604899087036	0.12041466514192144	-0.10855492463215145	0.9135555143222437	0.9967783847173113
Atad5	129.60885016802163	0.05130452882806763	0.20314631050598947	0.25254964611604397	0.8006162453144022	0.9932301794244984
Hip1r	1167.2765307673526	0.2661143072880428	0.14805593545860282	1.7973903340231145	0.07227367417935614	0.9066875931076556
ENSMOCG00000003818	472.19985086412015	-0.10898643758155657	0.17502190008612256	-0.6227017163447998	0.5334805546310342	0.9827898691553396
ENSMOCG00000003820	49.67258609225808	0.029569216113460573	0.29870500955544405	0.09899136327665804	0.9211451275290226	0.9969498598140254
ENSMOCG00000003821	1112.6416083940094	-0.31122397080325476	0.26377035372935925	-1.179905043925388	0.2380379835486627	0.9790994683758689
ENSMOCG00000003822	86.86157863692871	0.021049398637843893	0.22558538834988043	0.09331011548140038	0.9256571961537462	0.9969498598140254
[truncated: 10,129 more rows]

## Sheet: Res_LT_RP
genes	baseMean	log2FoldChange	lfcSE	stat	pvalue	padj
ENSMOCG00000000002	14430.048744173035	0.0607814671822376	1.4311748233687978	0.04246963137540807	0.966124320550693	0.9887355771647884
ENSMOCG00000000004	35063.164797280784	-0.4812221469261124	1.659917141612783	-0.28990733022887805	0.771887133630206	0.9346136699509527
ND1	93023.29274790283	-0.02269781931127987	1.8670550840221918	-0.01215701641880968	0.9903003432182337	0.997091836555011
ND2	65806.17229115787	0.5830557656319528	2.1243857789001224	0.27445851474953087	0.7837322803757384	0.9383855531369372
ENSMOCG00000000014	201.85459272638667	0.29015297063755036	1.432993509201575	0.20248031046505974	0.8395412495923753	0.9560303112278585
COX1	101424.29191296597	0.5642373230605904	1.5638450393876902	0.3608012999046968	0.7182479909841126	0.9152559492971001
COX2	29618.927956533877	0.3207891107978902	1.7449814194888793	0.18383525876845852	0.8541426950005842	0.9598779436320931
ATP8	5024.172330062967	0.0774419205194836	2.760547204843809	0.02805310497266619	0.9776197961480454	0.9929013699431358
ATP6	83763.12501572452	0.35047786637199935	1.8197132478643427	0.19260060165156692	0.8472717737007149	0.9593371596970953
COX3	72797.96649693025	0.1710678237851262	1.6747174373035545	0.10214727569837737	0.9186397766520462	0.9751237060323895
ND3	8848.454946896338	0.270199128376721	1.835645837853655	0.14719567511598736	0.8829775741736179	0.9658926467006905
ND4L	5752.450089093122	1.0644666205094593	1.5510417699956283	0.6862913953068198	0.49252937396071444	0.802954452020401
ND4	97402.99898054237	0.7987062823335709	1.8943868550099017	0.421617306001311	0.6733043723675979	0.894624984269455
ND5	28070.575483603956	1.3865688608294782	1.7031890206790774	0.814101572987266	0.4155867648393517	0.7606830548667954
ND6	10439.137462888717	1.2162047266649159	1.6059145586400578	0.7573284145918938	0.4488531315902842	0.7806027260707312
CYTB	54815.09124700645	0.5297145478098915	1.6495371863946982	0.3211291944061347	0.7481124870709825	0.9276024151211083
ENSMOCG00000000037	180.05910022584257	-0.6985697470853987	2.0561531989571558	-0.3397459622365205	0.7340478455050066	0.9221737775983032
Atp6v1b2	10007.758594125055	-0.6359410412928299	0.4504129098129321	-1.411906780285122	0.1579774110595381	0.5415974501136845
Leng1	274.91000816686477	-0.5427177142013294	0.2865021498319323	-1.89428845305244	0.05818673284559963	0.36323182519678254
Klhl13	2159.8265495204037	0.9733765964217	0.5239132159923913	1.8578966262149728	0.06318369560067659	0.3737918498565168
Zfp282	242.07937632690994	0.21035470213589685	0.35872497264219194	0.5863954789278467	0.5576097817868504	0.8380568061139626
ENSMOCG00000000053	44.41476991716866	1.0766223920419138	0.9152252746357838	1.1763468753311672	0.23945629129969226	0.6274216374166905
Nck1	406.36820040523804	-0.19261692675491907	0.4153904958517503	-0.46370085179720283	0.6428620868335062	0.8836475459820528
Tmem185a	189.47259912818492	0.5272400986096484	0.4654244483000416	1.132815649318354	0.2572916782112416	0.6438789219882334
ENSMOCG00000000057	160.13790978535746	1.2271547552518156	0.5758502131447565	2.1310311731070506	0.0330865741232245	0.2865020601709148
Magel2	778.8057111738498	0.7897587655531433	0.9996460352211952	0.7900384113246551	0.42950533616368086	0.7689772061402842
Comtd1	54.91816627529032	0.3584711662467365	0.8007876686451397	0.44764820973484426	0.6544071042495161	0.887974587372803
Aasdhppt	831.7921258243636	-0.38786828665010414	0.4059121162584583	-0.9555474476232066	0.3393009229037265	0.7077647035907938
Etv6	58.229970141869025	-0.3254649691696413	0.6617668317559418	-0.49181215127698047	0.6228521456116912	0.8736680485508649
Rps6ka6	250.3283802634466	-1.295675340091536	0.5526435570856739	-2.3445045608134594	0.01905237750646871	0.22255841392214912
ENSMOCG00000000071	7528.140285889058	-0.7093492500478515	0.3932913261621309	-1.8036229198592306	0.0712904405057485	0.3937688500686118
Cpsf7	1547.9966467142813	-0.20990080563953747	0.23178883298104747	-0.9055691033083562	0.36516396842072013	0.7244414337844567
Strip1	1109.2852947199574	-0.07535105643841761	0.41300032665906217	-0.18244793423764288	0.855231210936708	0.9602879388593458
Rasa2	438.08217341442446	-0.4575927524402561	0.5885784787927404	-0.7774541015819081	0.4368909038575112	0.7730398007883789
Aldh9a1	336.93896341649776	0.812218758578301	0.53386334687289	1.5213982442059013	0.1281599292288484	0.5037207381397758
Slc16a4	30.867800744318583	0.8613245511540465	1.0065811103637066	0.8556931401611791	0.3921675356067973	NA
1700109H08Rik	96.26387649824963	0.1748471346315858	0.5687536184969604	0.3074215775429308	0.7585225063664098	0.9307005412411623
Mpp1	767.5863819149391	0.01258082756269524	0.283977604138663	0.04430218221205982	0.9646635322305228	0.9882335866913122
Wdr83os	476.09709262785145	-0.11691475695715049	0.38407229378894964	-0.30440820347586944	0.7608169187019307	0.9309817389762997
Ankib1	1194.5346031525546	0.327131664783323	0.2728601656400099	1.1988985787500936	0.23056738446344271	0.6196529077516456
B3gnt2	444.2489890541815	1.1629532201039887	0.5670884003914296	2.0507441508259854	0.04029186893722906	0.3056922736621971
Ankrd52	1127.7429370508676	0.24475484545859674	0.3674027967288147	0.6661757821055831	0.5052987505925626	0.8088997568029307
Hgsnat	401.46235979657956	0.16486317733085473	0.5004151647903186	0.32945280025623297	0.7418134642979873	0.9252916622638825
Ttc25	41.7864311164038	0.802259692290117	1.0979592843615764	0.7306825523649558	0.46497307513494684	0.7876435446328769
ENSMOCG00000000091	307.475578967904	0.6566753143725267	0.566407346641473	1.1593693448121745	0.24630566673292803	0.6341344422576273
Tmem47	1161.2174439059527	1.85955151134337	0.6908737976372504	2.6915936278129693	0.0071111534755632835	0.14000966412483207
Socs4	195.00231640350154	0.1293109869382918	0.452357086231702	0.28586042061482675	0.7749850290690157	0.9354459764278169
Zc3h12b	563.8561739807516	-0.5244681368583712	0.6039670787622751	-0.8683720608301647	0.3851906847447026	0.7383442332340431
ENSMOCG00000000095	53.79469772598602	0.3447250163781982	0.6493779559239514	0.5308542016763022	0.5955198166075174	0.8595608276607108
Amigo1	345.8748941166274	0.24289451715749094	0.5568741017876285	0.4361749206468252	0.6627098225199675	0.8911064234969983
Thtpa	1138.5104899303574	-0.3249571655354264	0.27145226696363295	-1.1971061032949917	0.23126520138640672	0.6200850476629779
Serpinb8	221.7686406303867	-1.3959514451087394	0.5614543683089795	-2.486313267653694	0.012907428823626114	0.1908989492237992
Zdhhc13	245.42611687864408	-0.6503717179358461	0.43335412982023364	-1.5007857850706001	0.1334109764829672	0.5124429368008547
ENSMOCG00000000103	1257.1816481189946	-0.47289746887911266	0.2078008732297312	-2.2757241657801304	0.02286252404499051	0.2406027751708205
Rgs7	1036.215240425535	-1.0210416077813307	0.5170499447061258	-1.9747446416644667	0.048297134100893584	0.33180214831185817
Mapk1ip1l	776.3969332812824	0.20016219226035367	0.2350659577977707	0.851515013639512	0.39448332688837706	0.7459366709105708
ENSMOCG00000000106	1092.9971372687255	-0.3152910950813817	0.43880384408772205	-0.7185240041296249	0.47243425266266004	0.7911826690134282
Cfap99	41.354497600185866	0.8567133794830172	0.7099884492774575	1.206658193319735	0.22756380566915338	0.6172734061280337
Tmem237	259.65813430209687	-0.639359462336127	0.3586626849546582	-1.7826205210529615	0.07464809703458043	0.4011365431248218
Pygb	2348.782159616095	1.8258801215552443	0.46279849966042436	3.9453025947468996	7.969926821230284e-5	0.012151073045906478
Pls3	1387.2714088611033	-0.09506330987223731	0.6130545595910404	-0.15506500748587962	0.8767700684370323	0.9651789439367574
Mogs	107.7572135162554	0.32791076411025094	0.5012150342096231	0.6542317004264259	0.5129625410777994	0.8138543676849934
ENSMOCG00000000120	80.99223018784271	1.7238930717339727	0.998539113352549	1.72641516860174	0.0842727488141198	0.4233931258544624
Polr1a	406.14992280812294	0.0782526035583206	0.4121056388746869	0.189884816359224	0.849399390794351	0.9596221702767143
ENSMOCG00000000123	311.8956929349157	-0.662617271685697	0.8975058769195614	-0.738287390339934	0.4603398274249348	0.7858604930573665
Mfsd14b	298.76992767056527	0.7833751565802539	0.40575011526070054	1.930683756126412	0.05352217293715915	0.348604695213521
Aktip	1902.3303486863158	-0.9799383176118983	0.23995373385487645	-4.083863592656421	4.4293037430073585e-5	0.007861683598782613
ENSMOCG00000000129	70.40181793210003	-1.6178080292462698	0.8380738338274092	-1.9303884263488855	0.05355872788245907	0.34861543074887974
Borcs5	279.06367814704424	-0.3900698144254461	0.38601332793010407	-1.0105086695246868	0.3122516479586554	0.6895271322527999
Oprl1	451.6399919660569	0.5305955846316756	0.5204680817477606	1.0194584514191654	0.3079853686258849	0.684079567370008
Zxdb	305.04158572813515	0.3409425540253921	0.533274275324685	0.6393380851116597	0.5226030176204055	0.8184213020570185
Psrc1	40.210098077363924	-1.040999400062428	1.184971118860278	-0.8785019174675548	0.3796713975947554	0.7345131381481749
Rnf150	94.19189500900382	0.16264740643889292	0.7031252421071984	0.23132067617349983	0.817065684970933	0.9478631475635876
ENSMOCG00000000138	211.74052324204317	-0.17571482114258397	0.4850739673586995	-0.362243354553487	0.7171701841023046	0.91467983704364475
Ccdc74a	44.6961412156084	-1.0437647495152371	0.8331560527416251	-1.2527842126100777	0.21028424865248704	0.6019228732338692
Gpank1	1050.4442791928193	-0.26464149108951646	0.24638753307355266	-1.0740863703136903	0.2827839726991167	0.6642610189447908
Rtl5	1134.8070843570522	0.003691657561045631	0.529275559883356	0.006974925427992962	0.9944348598119161	0.9980986528427589
Atg14	402.42842203144914	-0.34080649556599674	0.3006516682470828	-1.1335593032063729	0.2569794521602001	0.6436442592271143
Thap2	160.37042274981243	0.18111673556889313	0.49979611746708236	0.36238123754697205	0.7170671583479816	0.9146586556981869
Gen1	98.30589022836818	0.057870603999955104	0.7511247603016231	0.07704526206367697	0.9385875380311902	0.982445317546693
Erbin	1471.034877266192	1.1882287080707425	0.4351196024875733	2.7308094171755397	0.006317899530693348	0.13021223781456723
Ints1	1000.5399347425275	0.4956849094736622	0.4575121579794459	1.0834354909010555	0.2786151696544202	0.661486507966608
Zfp746	412.75580338803644	0.17946451143435127	0.3341636436411515	0.5370557654891773	0.5912290945624856	0.8561288112443864
Tnrc6a	1817.823760663073	0.48037593119725874	0.34534841220573553	1.3909892567019617	0.16422868457040318	0.5487296109261115
Plin3	190.8891356130698	2.393931473721523	0.7116957356489292	3.3637007414955487	7.690488434057161e-4	0.042736116101779326
Bcan	1294.5865258269764	2.666745480313758	0.7258675145527745	3.6738735745142246	2.3890097075397745e-4	0.022911373743599195
Lims1	257.0159448970577	0.5948499313569238	0.47904191526798107	1.2417492340396945	0.21432909848207055	0.6050860410989883
Mrpl32	187.39737002186476	-0.42127880548594615	0.4453007104146766	-0.9460546449468706	0.3441207153713566	0.7109439116985014
Cnksr2	3757.6236640589054	-0.25212468871894017	0.924791824678147	-0.27262858731118916	0.785138734590765	0.9386393482107406
ENSMOCG00000000160	572.99300345447	-0.8109203374355481	0.3250682159045514	-2.49461589217217	0.012609354271915866	0.18837995100706467
Rundc3b	1019.347263712091	-0.7582339958646614	0.34382806480032446	-2.2052708126225826	0.027435096703277557	0.2614080217930574
ENSMOCG00000000164	47.74647785184789	-2.1519198144353866	0.7533691209872408	-2.856395031980388	0.00428481658495223	0.10484575890586816
Elf1	170.29145603961942	0.9147828917376843	0.7314788917195011	1.2505936973619118	0.21108275124063944	0.6021585289317788
Tpgs1	248.25664354128034	-0.3015160742827564	0.5584388974847508	-0.5399267057520646	0.5892475797838286	0.8549697680318801
Zmat1	108.16259766295563	-0.6061598547938147	0.4704224456992501	-1.2885436490871527	0.19755678478187505	0.590287759956296
Stat5a	48.77257534522068	0.8454933637962104	0.7534102998190687	1.1222216685904818	0.26176820169390047	0.6479907274237853
ENSMOCG00000000172	31.42224811604983	-0.5834693023709808	0.8442183674889069	-0.6911355223252089	0.48948037884414475	NA
Hdac11	3779.0477244822982	-0.02924479354548232	0.26317574952639117	-0.11112267599925525	0.9115190672536733	0.9732254217795548
Gpatch1	334.12323962944674	-0.23761457280571754	0.4143821089293846	-0.5734189958626079	0.5663610314859673	0.843582838981854
Isoc2a	89.85211836398798	0.08564377913215754	0.7369522186899717	0.11621347620663994	0.9074833566524133	0.9719291829261109
Sft2d2	215.59824201021488	2.252322483483571	0.6108319422696155	3.687303049534068	2.2664338530224657e-4	0.022460359483452635
ENSMOCG00000000177	196.7675298439265	-0.8188522261439919	0.5370332560250429	-1.5247700527987547	0.12731646190314244	0.5025375574103532
Daglb	268.5526069924142	0.2095537097387064	0.40148024262118753	0.5219527326440037	0.6017032413195788	0.8627055222642634
Parp10	43.14467739376493	1.861503120404525	0.8854465854104668	2.102332485184961	0.03552416083311311	0.29385420365038273
Ammecr1	77.43409799970696	0.4351438947596017	0.8489845922257602	0.5125462802791233	0.6082687388924086	0.8662881233439365
B3galnt2	225.35026965307364	-0.49869430989575675	0.45850699893365215	-1.0876481952414425	0.2767504456870855	0.6613979702795059
Il17ra	40.689275608078006	0.2579848712970605	0.8751808763076409	0.29477891745702917	0.7681627726226461	0.9338572574144866
Parp3	37.194626209261926	1.628278475191863	0.9116558087346572	1.7860671314669185	0.07408838925715791	NA
ENSMOCG00000000187	213.88295803636416	2.454763044538785	0.7224622406731853	3.39777348398368	6.793664598711632e-4	0.04039512970393937
ENSMOCG00000000188	29.566729075362	-0.6111873750406982	0.8510615114804991	-0.718147121913059	0.472666577921988	NA
Rala	1422.762980370159	-0.5893276304592587	0.41805957657315196	-1.4096737964717772	0.15863602546146455	0.5425653191796769
Gabrb2	489.746957910224	0.12957625587155416	0.8843222233063265	0.14652606533746393	0.8835061148108908	0.9659515231526261
Zscan25	287.8919732611554	-0.17197148364484122	0.31298219872708294	-0.5494609097394656	0.5826891837646692	0.8499612352413543
Fam160a2	761.7534786819682	-0.520835821640522	0.3548096016822816	-1.4679304595226554	0.14212311336021208	0.5211619069009072
ENSMOCG00000000196	5195.680286729619	-0.5991129896727362	0.28905117851985235	-2.0726882787353467	0.03820129931624435	0.300282312435192
ENSMOCG00000000200	92.39738402053088	-0.00957243121003671	0.8388097706761799	-0.011411921444739726	0.9908948017018658	0.9974276450145726
Tnrc18	1174.1312637461328	-0.9765862758644458	0.942652524370014	-1.0359981547995218	0.30020300335324684	0.6786893405740193
Sdha	3297.7858334209723	0.24039435358506453	0.3324216389394919	0.7231609661512487	0.46958099697777317	0.7898525058075925
Bloc1s3	218.17535845468487	-0.4369058703767472	0.3888664519218972	-1.1235370606474908	0.261209469836845	0.6476862000208009
ENSMOCG00000000209	4896.065020782136	-0.5229485421684935	0.24719819553967964	-2.1155030724508306	0.03438709334227801	0.29167711414149083
Ankrd49	160.2850956202665	-0.2860330279140638	0.5798883518322997	-0.4932553430505583	0.6218321778651474	0.8731642766763884
Smim18	129.12304328527782	-0.9371672827558352	0.48467863544594	-1.9335848832981308	0.05316418735528532	0.34737830551046867
Abhd14a	538.9897101525014	0.4418334810684108	0.421325358140855	1.0486752637392873	0.29432760278233505	0.675182070271514
Tbck	476.89229716202783	0.30620891264904604	0.5853369286381833	0.5231327423018687	0.6008818816908306	0.8622767391175765
ENSMOCG00000000215	247.71682978954334	0.23705038809597595	0.38217322937959236	0.6202694743449086	0.5350803884955015	0.8249787054859089
Hr	213.2458022472488	0.526961665483361	0.5542634369791303	0.9507422469636991	0.34173523646425036	0.7093586022050734
ENSMOCG00000000217	711.2792881226832	-0.725651763071265	0.4394151324605216	-1.6514036715302693	0.09865617564028556	0.45210760721166704
ENSMOCG00000000218	77.06195795269166	0.27773677942381675	0.7467428993174419	0.37193092787046417	0.7099442772490032	0.9120507775076023
Adap1	1918.913265871598	-0.5099207713308749	0.3322761670571201	-1.5346293893031957	0.12487488932481099	0.5003836729470069
Plxdc2	125.98637358128427	0.7194511412731466	0.5364357829062453	1.3411691840827247	0.17986552905692132	0.5688080909462618
Eif3k	1160.9869432365304	-0.7017639244510282	0.2956734571708598	-2.3734424157170873	0.01762314078035384	0.21570509422380513
Cwc25	488.4801926530878	-0.6202002693988856	0.5027564518710277	-1.233599821724388	0.21735205948825498	0.6078822861949481
Aplf	80.46459071411132	-1.1411040868931694	0.6265609057653841	-1.8212181391994733	0.068573704207644	0.3857514145871819
Pot1b	285.72572265673676	0.06046354444900803	0.41197340138728294	0.14676565099931826	0.8833169975664666	0.9659120128348718
Diras1	1519.2691498183624	-0.29373718631153245	0.4126799065506175	-0.7117797150986414	0.4766011958048081	0.7939673766007478
ENSMOCG00000000233	534.5356482814615	-0.7381736255134485	0.6857483385384844	-1.0764497469825396	0.2817261641378841	0.6636861220142072
Tmco1	387.70441304937447	0.8797662776823166	0.41454143470200366	2.1222637932797803	0.0338155921399047	0.28972263813238236
Ipo11	997.483944240599	-0.03607270101029292	0.36797148938117724	-0.09803123897168468	0.9219074877169091	0.9768695184401825
Polr2f	281.27213465734025	-0.1042441444694366	0.4848549860038433	-0.21500066510321558	0.8297668000086436	0.95259992518073
Brca2	299.9629982815265	0.3886442278413536	0.46501708905547484	0.8357633235173209	0.4032880633643718	0.752905115047232
Immp1l	111.59760799769718	0.09130311278548156	0.6924920425044327	0.13184716528334275	0.8951051796626915	0.9690996719363372
Prpf3	510.3889980726517	0.141034243370002	0.38411561479299877	0.36716612899479717	0.713495102709991	0.913040327281525
Tapbpl	94.5299273834429	0.645860006352099	0.905363154478525	0.7133712070755787	0.4756160852167115	0.7939103478210265
Ocel1	255.56825665290094	-0.18509846768048294	0.49327812664751014	-0.3752415882262539	0.7074808031696793	0.9114247331051702
Lratd2	150.62968570209063	0.5429067432298773	0.6349182991895254	0.8550812662399225	0.392506159915778	0.7436168956059315
ENSMOCG00000000248	198.89261808455447	-1.0888159511205597	0.6002858589421836	-1.8138290864276863	0.06970404299037745	0.38869192759687493
ENSMOCG00000000250	547.2045874745579	-0.3614330191506815	0.40822903185300946	-0.88536823927021	0.3759580565125493	0.7328885475110007
Tmem127	650.2086806025737	0.6062612381443357	0.47342790385841504	1.2805777462699923	0.20034202063897552	0.5924770522602201
ENSMOCG00000000253	1466.987326669069	-0.34266261034368356	0.3436669652076966	-0.9970775344572149	0.3187268766942477	0.6943675191869556
Asb4	237.41516182017736	1.8944237772526178	1.0119890211270948	1.8719805627364596	0.061209292666288925	0.3687441278558804
ENSMOCG00000000256	55.61325199828285	0.5107555811512143	0.889022971901311	0.5745133672517885	0.5656204575840833	0.8430658839397015
Ddx1	1953.788818329836	-0.35461043079520216	0.40603529083363316	-0.8733487920893518	0.3824729933751616	0.7366972525457437
ENSMOCG00000000258	98.76336715308658	0.9355526408657818	0.4874535519592436	1.9192652040496447	0.054950779272913836	0.3518462515709376
Nfatc2	38.13865656327147	0.15788670256641454	0.8408078171587405	0.18777977481221048	0.8510492910840741	0.9596221702767143
Trpc1	422.3762053440701	0.41355602840767497	0.2914685713759121	1.4188700567455164	0.1559369034479567	0.5396156223482099
Cep89	169.36111430805576	0.581655732471455	0.5593533322773862	1.0398717570936165	0.2983994855212707	0.6774659568191965
Slc1a3	8460.330425508138	3.1043964568469655	0.7164267582607124	4.33316653942908	1.4697983810560224e-5	0.004263132279882492
ENSMOCG00000000264	64.72675484374562	0.7269768753821987	0.5376924108364617	1.3520311254742772	0.1763653584189284	0.5650249472291453
Ash1l	2392.377892447601	0.23747995749951886	0.37651676296804115	0.6307287771930522	0.5282178796110502	0.8203034739105048
Glyctk	52.169864167808896	0.1403966604603393	0.8523049112241707	0.16472586114596796	0.8691597607886012	0.9635972439779001
Usp38	564.0637613225134	0.1833227320589802	0.26113935103912617	0.702011134398175	0.48267221969751545	0.7979894392663498
Ccnc	434.0545277350864	-0.3635669326003089	0.3962967722141121	-0.9174107842692198	0.3589274237369069	0.7210075883579894
Armcx6	111.18192771239201	0.3594984557100255	0.5690060050616073	0.6318008114362553	0.5275170433485712	0.819931982879278
Trrap	2561.1428135210303	0.6484587670925165	0.5002127986630327	1.2963658043650925	0.19484948736585433	0.588327263857185
Zfp882	115.2467331042462	0.027333611299728132	0.515429840058888	0.05303071179698338	0.9577074376587102	0.9868095757876029
Stard8	217.789858970891	-0.679888673940293	0.8298455485648425	-0.8192954401166711	0.4126178735522534	0.7585178160895651
ENSMOCG00000000275	297.5804374818558	0.4217831568175146	0.6056721998737989	0.6963885033940794	0.48618556086846637	0.7999194866603172
Rbks	131.38433974868215	-0.9686834335164091	0.8175838284072716	-1.184812370131505	0.2360916405564039	0.6233504319180291
Arsb	2187.645543730317	1.0268856436211355	0.3721723932566386	2.7591666180167933	0.00579489807285725	0.12437153420317525
Mgll	2636.861378710447	0.08887984278257655	0.35236838168375	0.25223557902066834	0.8008589788476548	0.9438207509304681
ENSMOCG00000000281	233.65982212610677	-0.4788549957652188	0.4145560205296907	-1.1551032238136871	0.24804815822110932	0.6357605377419112
ENSMOCG00000000283	543.5539879205535	-0.7610826733785494	0.39447683827406393	-1.9293469211233765	0.053687808406811546	0.3492405733092238
Adcy3	940.5621941015316	0.35118496948714895	0.4268703252538203	0.8226970785058243	0.41068027711317634	0.7570624485242432
Zbtb24	123.8354804117745	-0.13770398226863007	0.46847931253961417	-0.2939382350143496	0.7688051006559584	0.9340118704095105
ENSMOCG00000000287	123.84853675674914	-0.4397369714883587	0.6231968197057988	-0.7056149158398329	0.4804276458466221	0.7959383622747326
Atg5	317.84430949697196	-0.40284356284173933	0.36898827383323995	-1.091751666406071	0.2749422688771527	0.65991854587861
B2m	317.95175921522014	2.520110591971083	0.7969335695259765	3.1622593003204376	0.0015655009653177312	0.06071458469444811
Pik3r4	748.1935176881766	0.7782181479411668	0.5450736136490496	1.427730362384097	0.15336948340611706	0.5364323225486894
Ankrd42	315.4298578729913	0.05103610807850882	0.46139445180591426	0.11061274767989013	0.9119234383361924	0.9732544372414301
ENSMOCG00000000295	249.48828259821093	-0.17644357306781722	0.551812675382404	-0.31975266415462916	0.7491558336427626	0.9277483461452806
Gtf2f1	582.1747732443631	-0.4381732694786544	0.3789629009625806	-1.1562431793868928	0.2475817025642367	0.6353564106374412
ENSMOCG00000000297	192.4232381764721	0.8088035162540174	0.437128974405617	1.850262882605259	0.0642756695997256	0.3746893445489886
Ranbp3	742.1404706780935	-0.3496538405714491	0.32186207806702627	-1.086346806282147	0.27732558614186376	0.661486507966608
Ago2	322.8125483370609	-0.3503666461604071	0.5923326384835221	-0.5915031916144425	0.5541833173042905	0.8357022583543777
Pla2g12a	496.4218542345209	0.125156120600393	0.46119979767940233	0.2713707187863812	0.786105920374861	0.9386393482107406
Sv2b	3920.462289832123	-0.8504777909220429	1.1448594963597332	-0.7428665208493053	0.45756249675915994	0.7855252218074101
Rpp40	66.46382053971008	0.2883840855831866	0.564819294510752	0.5105776101947539	0.6096468570945078	0.8665206885873343
Chkb	319.98245569275775	-0.2591209438121675	0.47094117396570473	-0.5502193440215899	0.5821689372836605	0.8498513289627491
ENSMOCG00000000309	281.26824316049834	-0.39703051868796396	0.7267855646267698	-0.546282890045915	0.5848714956406268	0.8516898411602436
ENSMOCG00000000310	4182.559181610719	0.547884388681293	0.4112780109500862	1.3321509394962174	0.1828105942518727	0.5725529594003872
Wdr92	280.38664084584497	-0.17552338383041544	0.4197627859922556	-0.4181489872083462	0.6758381904406567	0.8960672899328064
Rnf144a	154.88895868814436	-0.08099621079957008	0.6304595762162153	-0.1284716956568085	0.8977756961782786	0.9701826928193984
Smim13	2892.858597921608	-0.38367108673046574	0.4349743524267349	-0.8820545041103074	0.3777473335582299	0.733606226698996
Gpr173	130.81707814261554	0.49840058922876557	0.5480299483148526	0.9094404252200208	0.36311769127324467	0.7240643010804626
Wfdc3	101.46776895809413	-0.5066558425927625	0.6218087476922123	-0.8148097698418855	0.4151812077228	0.7602917958484042
Phf10	568.2389862939798	-0.108378015409894	0.5053984775886842	-0.21444072393525662	0.8302033870957104	0.952603114564086
Rtl9	80.39161264970005	0.7579672437684847	0.956156630955706	0.7927228858004934	0.4279392934818138	0.7683306427887718
Cox7b	1946.260200357238	-0.6936823415955427	0.32981561924994973	-2.103242845724167	0.03544454671021201	0.29385420365038273
ENSMOCG00000000330	120.51364389297667	-0.3873662457878256	0.48127208520488296	-0.8048799373496167	0.4208889668470756	0.763275443687485
Pex19	1468.8919930502775	-0.22025953066448076	0.26103520797466945	-0.843792423150269	0.39878541020704455	0.7496634303998504
Retreg3	541.2980122461969	0.8533980541588417	0.329228107228755	2.592117852094207	0.0095387089104254	0.1664129031419647
Hdac3	1011.4496808594743	-0.11996061196728074	0.2850204552532354	-0.4208842199087008	0.6738396286547952	0.8947410522513203
Msl3	425.6071624944041	-1.1267122095376771	0.35567850558599773	-3.1677826797021758	0.0015360629659600937	0.06071458469444811
ENSMOCG00000000344	85.97456242737356	-0.058938899041440285	0.6100521461623396	-0.09661288696746292	0.9230338220532734	0.977010966787497
ENSMOCG00000000346	1810.3392579955914	-0.6469925029530815	0.24164318619626582	-2.677470501599766	0.007418038423965054	0.14414266819900723
ENSMOCG00000000347	209.828078532618	0.5679015138526352	0.4663307807389658	1.2178083397212522	0.22329681438636803	0.6125595655554068
Efna3	402.46893821455023	-0.48392122190655484	0.4055392247464757	-1.1932784608173967	0.23276033516366046	0.6200940020515062
ENSMOCG00000000350	1543.4973490094205	-0.2955930361410243	0.20790675621013302	-1.4217577222082483	0.15509659679792287	0.5382551374901402
Prrc2a	5908.3415422056805	0.786042580243842	0.35195889059926727	2.233336339097662	0.02552677285131088	0.25212988600314695
Pla2g7	678.978052394531	2.0681441845259396	0.46478236718416477	4.449704486544045	8.598852402071612e-6	0.0038642848821727953
Hapln4	1180.6012810201717	0.23161944106028648	0.3803082742600644	0.6090307698693382	0.5425040437970676	0.8282780958832621
Zc4h2	319.03388744362707	-0.19627600741452195	0.38924311578718257	-0.5042504271850378	0.6140854083550863	0.8688523112621875
Mrgbp	257.31401085668114	-0.2640020385827654	0.5911826527316261	-0.44656594262858396	0.6551884904573793	0.8880216011533114
Chst11	168.2737530814366	0.7726115492231985	0.4724039530415041	1.635489170335793	0.10194654309161147	0.4600269109053864
ENSMOCG00000000358	465.98401168315655	0.4773625694975262	0.48137634942720886	0.99166186719713445	0.32136249862217764	0.6955765510265192
Vsnl1	10368.831655436894	-0.4956441763321279	0.6265528744445935	-0.7910652022329171	0.428905943961275	0.7685022578857138
Ninj1	191.09130946579717	0.39501088059113365	0.37206686508969633	1.061666376810808	0.28838716858153457	0.6711350702097083
Dmxl1	1735.385836694318	-0.05556162443791459	0.4359648348468337	-0.12744519740321464	0.8985880455085056	0.9702469459610314
Impa2	54.196031809905826	0.6693296683196823	0.8226001753872254	0.8136755721023357	0.41583083183601965	0.7609850985749331
Fbxl5	1234.7346369902978	-0.18815487441866344	0.3446581952677189	-0.545917308806515	0.585122779825135	0.8517164359247202
ENSMOCG00000000365	50.74654633495718	-0.3542282503960941	0.6718964581426681	-0.5272066046832451	0.5980501226405744	0.8613312411822347
Syn2	4245.077326976588	-1.1616750527881186	0.6807521069089597	-1.7064582555063248	0.08792279219899261	0.42956484924162536
Tecpr2	791.9470525824423	0.5124863711415739	0.31810058659529694	1.6110827604149753	0.10716168533481428	0.4690822937485005
ENSMOCG00000000370	149.01322740712888	0.78155145649558	1.5491949702082441	0.5044887645036203	0.6139179555959974	0.8688240088827119
Ero1lb	173.3812550067224	-0.12591720503638484	0.4772514224163625	-0.2638383022492754	0.7919045190299223	0.9397593593756947
Rxrb	661.5612530970715	-0.24970322533842634	0.4540305296789199	-0.5499701209850598	0.582339867394217	0.8498513289627491
Sv2a	3605.312259118676	0.41543667095306747	0.6374698021055465	0.6516962365603685	0.5145971508861943	0.8146418155402851
ENSMOCG00000000376	729.2900261054976	-0.5976128485873097	0.4168373362077193	-1.4336835899208078	0.151662577221349	0.535184382289698
St3gal1	170.75698857079044	-1.1090895430172232	0.7488582698657088	-1.4810406556852391	0.13859574006002393	0.5183235729246868
Sncaip	195.00564312843144	1.8528301982042699	0.7053839135697569	2.6266975508806234	0.008621792963439144	0.1570143367859392
Cdc25b	201.604980186954	-1.2550544935405532	1.0564527004859814	-1.1879892899731455	0.2348376292253436	0.6222339116494832
Tada2b	578.4979356944544	-0.1237057477345418	0.305116859754521	-0.40543727355501796	0.6851561173415073	0.9006163974162931
Il6st	711.7816526610743	1.1833281979739374	0.5167612265258902	2.2898935470241817	0.02202748840779933	0.23705963090094992
Timm8a1	256.4984881661856	-0.6958665982959467	0.4428523899704751	-1.571328537579621	0.11610635578231714	0.48651754156565025
ENSMOCG00000000389	418.1097385096815	-0.926822651296223	0.35202832994259275	-2.632807000071174	0.008468245269039524	0.15564818043186712
Eif3b	1967.959614484441	-0.004044553095548761	0.2949439828506957	-0.01371295341053343	0.9890589890923668	0.9963481150602648
ENSMOCG00000000392	102.86773852813239	0.39630556124690847	0.8816276058377878	0.4495158257553762	0.6530595943367838	0.8877320915514891
Mcl1	149.09123814888278	-0.4165276623965912	0.4907539921344907	-0.8487504311171088	0.3960201776664044	0.7474165930501319
Dusp10	114.69232801868684	0.3954430357961916	0.5345651253567965	0.7397471646363994	0.4594534237604239	0.7858604930573665
Cdv3	2162.0939965707844	-0.40702301577066663	0.28078141095606146	-1.4496081289169114	0.1471678278830414	0.529429122652795
Vip	120.84516292267388	-0.8213151758722055	1.8072356432547136	-0.4544593722117335	0.6494982274716239	0.8865740267553434
ENSMOCG00000000404	664.2761366673034	-0.5349553119128778	0.32646175042345216	-1.6386462157327453	0.1012869613577979	0.45850953348569945
Rbm42	700.7766552518856	-0.1635703214969112	0.31068685792428224	-0.5264796927354264	0.5985549578877394	0.8614323561903663
Trappc2	384.8853142851744	-0.8771803388042627	0.538126071013805	-1.6300647488639508	0.10308781305181501	0.46226254630927005
Atad2b	202.56614287222934	1.2283957425684462	0.4967937729121083	2.4726472221417546	0.013411646044316205	0.1930887345750706
ENSMOCG00000000409	472.50955298847884	-0.3652868474091542	0.4255407832967451	-0.8584062015847406	0.39066820436386995	0.741670863073937
March4	140.55982248046513	-0.6173612422783009	0.4321366735634211	-1.4286249699371927	0.15311205334061959	0.5363378023316174
Ube3b	992.726492339599	0.07667204032730758	0.27626018456392554	0.27753561537770555	0.7813688623385677	0.9383855531369372
ENSMOCG00000000414	331.73408087419693	-0.09878347226558422	0.42999185774555293	-0.22973335537911324	0.8182989741818834	0.9480555196268287
BDNF	84.83892064758544	-0.08991809088947181	1.448623000976829	-0.0620714228814803	0.9505059543387734	0.9853893288809709
Crb3	41.26251984283853	-0.11144688596149574	0.716701285509704	-0.15549977126417022	0.876427334252462	0.9650688461698561
Trim45	185.83391194299574	-0.20071630786473893	0.7817235199048905	-0.2567612496668379	0.7973630856654315	0.9435066482321702
Cmpk2	305.5962987355369	-0.8769585588819852	0.4377476155636119	-2.0033428571686844	0.04514050036678837	0.3201018666439161
Pfkp	4520.971971555469	-0.1976520961298698	0.49924841644257467	-0.3958992950608677	0.6921793211255733	0.9041516351961026
Rassf2	70.2146320338811	1.692676874378868	0.8240900433485876	2.0539950555656343	0.03997617026624707	0.3053285913976944
Commd5	212.17366830191176	-0.6449951670659357	0.3261564538775994	-1.9775637102922106	0.04797794657636214	0.33056416030480795
Hist1h2bc	286.86818533431443	0.9135309838618921	0.8794284199595757	1.0387781007849213	0.29890794843023705	0.6780557094291547
Sgcb	820.8026147095832	0.9541881485575622	0.4211653416859041	2.265590384854542	0.02347647433676783	0.24324068725340658
Ung	128.5032180533502	0.6297110827074143	0.7088970368323905	0.8882969599099922	0.3743810345618592	0.7316006337107547
Adcy7	613.4530628687596	0.44483503468234536	0.4894664908564289	0.9088161150807463	0.3634471986698668	0.7240657314898874
Adgrb2	3882.033439375267	0.041963038849197686	0.40234673329224535	0.1042957115765067	0.916934681021353	0.9744760402205895
Spaca6	75.53088222477581	-0.040141259128013765	0.74321086991138	-0.054010592085124084	0.9569267252974073	0.9867263106476485
Zfp954	123.95841098482283	-0.4492093107231563	0.4675903657437933	-0.9606898337364193	0.33670814438382196	0.7040853267122228
Trhde	237.6357618384025	-0.12122313857836463	0.6412722028474602	-0.18903538628384933	0.8500650825129663	0.9596221702767143
Bsdc1	1350.0318689040969	-0.3424125917906268	0.2297419228092264	-1.490422764829735	0.13611311048374447	0.5161534151379749
Iqsec1	2602.6733349481833	0.03954264782232464	0.5052037087131117	0.0782706997995923	0.9376127241138709	0.9822276014481337
Epc1	540.6832598193611	-0.27731908324260685	0.3342114748629242	-0.8297712798650867	0.40666811177044704	0.7544167287242804
Rab23	832.2598295341675	-0.4361207183752171	0.33895499664839385	-1.2866626032588497	0.1982119130409774	0.5904198456865308
Pir	133.05404624174324	-1.323001120408191	0.7349590354364484	-1.8001018514216096	0.07184455732828202	0.3950820195771097
Eed	226.3862457033194	-0.5355280892792783	0.44716875512099247	-1.1975972899411946	0.23107383165958897	0.6200567879965755
Sass6	58.01886203912446	-0.6762092470277211	0.7791925069202614	-0.8678333544305	0.385485567606351	0.7387338256531164
Rab12	2406.3781725376834	-1.0198442004136523	0.6414519594262359	-1.589899579269942	0.1118574425235145	0.47743135039684753
Lhfpl5	51.53108729517576	0.22260508245011365	0.715914916101447	0.3109379025964727	0.7558478295655449	0.9301421080188076
Sf3b1	4802.421155869449	0.33563486208174337	0.3890345329364989	0.8627379671113365	0.3882815524996894	0.7396221814870457
Nipbl	1100.1319101215201	0.7776425417849296	0.3521659272054433	2.208170869782288	0.02723236421993525	0.2607465984730032
Tspo	67.31454266745924	1.5147012106281754	0.8967864315426805	1.6890322571256329	0.09121324846130376	0.4370138947516833
Hpca	12182.275072190012	-0.5234679047830507	0.6214212342619745	-0.84237209146022	0.3995797096200372	0.7499180865027666
Kcnn3	325.82241327321304	1.387272163275188	0.7484316354594016	1.853572320501463	0.06380037064296984	0.3741805615117219
Twsg1	459.38141123413084	1.1238000195936844	0.4526831923149735	2.4825309149356554	0.013045274762127936	0.19132016894403428
Zswim9	217.1729060829616	0.3210481151074447	0.47327546337548443	0.678353601553042	0.4975475203493394	0.805681888293509
Gfm1	689.8498445630937	0.2772689990674027	0.37656959181765	0.7363021473111069	0.4615468397141001	0.7858604930573665
Lzts1	957.4117169275167	-0.05130186528450414	0.6187431825497938	-0.08291301905435634	0.9339207019786786	0.9811117480503927
Cenpc1	199.32153192751232	0.18642010877914053	0.5789960886351702	0.3219712748294665	0.7474744560729005	0.9276024151211083
Cadps	2511.448399539292	-0.34203001200115035	0.5761466558571626	-0.5936509541868206	0.5527455932214693	0.8343806289146628
ENSMOCG00000000471	6365.247167009042	-0.5117046863006406	0.530013716182665	-0.9654555545960355	0.33431668720242935	0.7031580968080016
Isy1	359.402718413335	-0.3071782293653169	0.4839035617411627	-0.6347922471577607	0.5255639203609632	0.8190740864095933
Btbd2	1893.594956839837	0.026349846156150103	0.4484155230277474	0.05876211862210579	0.9531415812571103	0.9860133287883451
Galnt18	223.20646684415243	-0.5349717862300276	0.5240569173022563	-1.0208276402188505	0.30733610654358196	0.6839486826287627
Ssr4	176.5766282225992	0.7372294619767336	0.45491936458231524	1.620571730670603	0.10510951907864345	0.4648428415333685
Jagn1	318.5786664758343	0.03311994491339569	0.46159726482857827	0.07175073909004925	0.9428002762292171	0.9833666943770394
Ryr1	971.1078081320965	-0.8982548419747005	1.142742709314195	-0.7860516935730691	0.4318372030085478	0.7702719637548828
Blzf1	379.21280981648783	-0.517304738009079	0.37576425144478764	-1.376673635185034	0.16861317354564528	0.5556641002639876
Utp15	536.4767786886508	0.10411323690902535	0.31725404964942727	0.3281699225717458	0.7427831879683686	0.9256185341422865
Gpi1	7244.349133530267	-0.10096783195123164	0.4396198881354341	-0.22967075575099183	0.8183476210031446	0.9480555196268287
Cacng8	429.0804195252767	0.583390419515341	0.49699204030795885	1.1738425813698057	0.24045808468552263	0.6278195607066016
Necab3	504.9665861600824	-0.953146839017754	0.7364050760438243	-1.29432410235183	0.19555349454251078	0.5891872706104734
Kif3c	1717.7887925629266	-0.6924289815650514	0.44944783442243613	-1.5406214660147572	0.12340894040596842	0.49832907277004296
Sept6	702.9007560778792	-0.695876558962301	0.5245145304112476	-1.3267059702172528	0.18460596527971282	0.5751953087885919
Atrn	1198.1616330093104	0.4696013980757499	0.5965630153077286	0.7871781958080534	0.4311775593120407	0.7699044347355538
Napb	5418.080868113826	-1.0372142711797512	0.5795052842039343	-1.7898271153895882	0.0734817086658897	0.3990157440432695
Cdpf1	74.96278721402756	2.2257608818104413	0.6974430364111637	3.191315656779012	0.0014162645605779705	0.05888887466571058
Mocs2	672.8889637422318	-0.27253443348296474	0.47656432013768685	-0.5718733483955016	0.56740778099445	0.8437928326985269
ENSMOCG00000000507	55.78145772743956	0.17287123141123678	0.62119883031424	0.2782864728251147	0.7807924592813045	0.9380868787404802
Mapre1	1027.801265704902	0.03968029178784624	0.41746577651511685	0.09505040657245199	0.9242747894693097	0.9776283728870435
Zfp398	289.8703743881958	-0.15250490583371779	0.3605842381717792	-0.422938358611964	0.6723402353355936	0.8945480061099663
Sik1	456.59264403705725	0.823243488923118	0.8514655740971677	0.9668546961467299	0.3336166769871143	0.7028859723581032
2410002F23Rik	684.561764769207	-0.07612554956456744	0.36638398030339836	-0.2077753222221363	0.8354044021217446	0.95418292532786
Fam8a1	383.0199205636705	0.35051845857096775	0.43927995602452324	0.7979386579418609	0.4249060883745787	0.7660817877535966
ENSMOCG00000000514	73.81044091387348	-0.9707240602663093	0.8256486014361806	-1.1757108999855097	0.23971042143496452	0.6276169818812413
Sike1	543.0520802941206	0.14527312848024762	0.3588050436822902	0.4048803968566342	0.6855654284992805	0.900619109590484
Ccdc65	506.63641439097137	-1.0305138636400921	0.4592109801364798	-2.2440967403127385	0.024826177657853967	0.24984435600604074
Tmem246	707.303683765258	0.2368104802413607	0.5567083111388907	0.4253762257597765	0.6705624342111673	0.8937021273789004
Pycr2	203.11770495801852	-0.035767790477576715	0.5307231156938789	-0.06739444621855811	0.9462676904141097	0.9845148703531285
Cars2	201.57103756419613	0.4492613812961177	0.38267024319315535	1.1740170271597263	0.240388205551764	0.6278195607066016
Akr1e1	87.3386846082671	0.4903266508097654	1.0971649503676415	0.4469033126199166	0.6549448720845698	0.8880008822176739
Crocc	1171.1312920443886	0.8166961291544466	0.8974999855537356	0.9099678465739083	0.3628394669796176	0.7239743190136934
Wdr77	966.9102572038718	-0.11214357726491635	0.30059958740352904	-0.3730663046931374	0.7090990961956742	0.9119009033728005
ENSMOCG00000000534	31.678804831624248	-0.39216576511697604	0.968517928127788	-0.40491327390816556	0.6855412609011395	NA
Magohb	191.52247580961452	0.3650946596675912	0.5210852471870318	0.7006428634057044	0.483525921538506	0.7980133486058422
Snx30	381.1320544559471	-0.6019918045694245	0.42576325799475445	-1.4139120585572962	0.1573877249251335	0.5413105630065598
Ago1	1723.5517507058444	0.3056662440884033	0.29190056046698143	1.0471588118892257	0.29502633821294943	0.6758139750255987
Cdk20	74.59692603269254	-0.4543213863860537	0.5381841948113775	-0.8441745238268917	0.39857188845318425	0.7496634303998504
Lgi4	438.32875235066706	2.1903697626691576	0.7249522660058771	3.0213986015065446	0.0025160989627648605	0.07894841389234755
Kcnh3	1167.912210653232	-0.8848012676711295	0.63376741179471	-1.3960977658436855	0.16268505652202753	0.5475943085649452
Plekhm1	358.0037057743805	0.10953857011140213	0.4149285421370865	0.2639938181818597	0.7917846822092415	0.9397593593756947
Mmaa	334.43192839715834	-0.5141004252832174	0.38758256052593804	-1.3264281669061642	0.1846979140801655	0.5752417080068225
Zmym4	692.3051856799606	0.059716312445034045	0.39552769662166126	0.15097883904235204	0.8799924085331885	0.9657270666544544
Snrnp35	274.3397166237625	-0.48649312991070154	0.41916544907620745	-1.1606231643921907	0.24579518091835248	0.6339180853352955
Upf3a	649.3499856822694	-0.6434388911403851	0.528560353415446	-1.2173423280475315	0.22347399586132863	0.612875277092849
Ppwd1	338.8148237954025	0.07301536333832416	0.45717757211437837	0.1597089791623831	0.873110327352241	0.9647521363273385
Rmdn1	925.9337491013783	-0.14020114807918851	0.6059424127477587	-0.23137701723736467	0.8170219183631166	0.9478631475635876
Bbs7	399.5946283243896	0.3511998732165086	0.7905031429944653	0.4442738480281634	0.6568446064584824	0.8889432216384754
Dpp6	1478.6675031666387	0.5020305855508134	0.5238088498374638	0.9584232601388691	0.3378493708250646	0.7058511450898926
Rcn3	26.687248832440503	1.1610607361607037	1.0405447204364973	1.1158201212857544	0.264499139103807	NA
D8Ertd738e	210.62555361447806	-0.5936027999774042	0.5735160469580991	-1.0350238726986702	0.3006577625374662	0.6789635609752274
Isca2	391.872047648849	-0.6960082730815215	0.4172814483085718	-1.667958822283507	0.0953239013538465	0.44526273022618
Slc9a5	598.2468530454971	0.500542074664682	0.7055010817543802	0.7094844892653835	0.47802387348660824	0.7948127079780882
Ust	235.78439780274923	1.0255330914705802	0.7552609061944303	1.3578527407674037	0.17451041578281346	0.5631690269984309
Fam219a	2360.4226483869897	-0.6869849194744113	0.2817941258863221	-2.43789652219914	0.014773002179737654	0.2018061828843553
Por	900.3227795935181	1.2863666618596135	0.5715601616046024	2.250623378382877	0.024409401425618597	0.24767628135960437
Hectd4	4018.2403765016966	0.8838257630399453	0.42555792164022627	2.076863613849365	0.03781414888253427	0.300282312435192
Actn2	726.2805106871414	0.3115760722105057	0.7181235063862663	0.4338753284632272	0.6643789763926256	0.8915181147961883
Neto2	855.9087347167946	1.3360785006497796e-4	0.4641559673330232	2.8785119543473805e-4	0.9997703279785257	0.999829052979292
Plppr4	2334.686572927133	0.30481392627226395	0.5397264355047551	0.5647563399172774	0.5722395073004116	0.8460863136661065
Ssr3	1084.708382576468	1.2360879324391754	0.4762038181959454	2.5957119309164325	0.009439516897414268	0.16605730021309242
Rem2	236.21937513202087	-0.5063886911574426	0.7110361258873279	-0.7121841953184891	0.4763507225051199	0.7939673766007478
Mras	6453.041768230898	0.039889316670684107	0.26469918307785284	0.15069678797970423	0.8802149071197134	0.9657270666544544
Gcsh	554.8121364169089	0.8984849529630619	0.5530639793864476	1.6245587969041373	0.10425660256337796	0.4638307211686085
Ufd1	536.7428932753069	-0.6747304628622381	0.34393549128687495	-1.961793650133794	0.049786513271416276	0.33692428461957097
Pde5a	49.040671265637094	0.4188777002022938	0.8188027371380486	0.5115734000430824	0.6089496058784858	0.8665150721034317
Adprh	61.70989395757459	0.8282224997440972	0.7712473435969533	1.073874038750555	0.2828791404314026	0.6642610189447908
Frmpd4	955.0012910573224	-0.34884323407753254	0.7617587123439364	-0.45794452813560826	0.6469922949696195	0.8852803966477149
ENSMOCG00000000589	413.5841813011165	-0.7873135743392999	0.8341213717386496	-0.9438837092714899	0.34522907766524547	0.7113956318827065
Ldb2	557.3961221360843	-1.0786031607379887	0.4371404754530703	-2.4674062945557265	0.013609583712450699	0.19475953009442085
Aven	82.62258469760224	-0.07667134602126674	0.536734145442118	-0.14284790090653002	0.8864103055191912	0.9666954327922989
Cecr2	80.28014171470122	1.7258713415077027	0.7139963314942894	2.417199172292255	0.015640456324619575	0.20483026664004841
Dctn2	2508.906622147522	-0.6373130966741906	0.19776536905395645	-3.222571776458557	0.001270453307374485	0.055341504510246796
Slc35a5	356.6007770904446	0.47884142470673635	0.4237684356738687	1.1299601017836347	0.25849303681447666	0.644444275429299
Ccdc97	227.79410946498209	0.14304853376867233	0.32903614239042084	0.4347502153697656	0.6637437449189852	0.8915181147961883
Chst15	559.3751599772756	0.6667590902095839	0.6400801380215521	1.0416806437245418	0.29755976600826195	0.6771030545857729
Slc4a7	269.80571501883986	0.9969814633008585	0.45014846385289253	2.2147836621889923	0.026774917150534542	0.25901123633932405
ENSMOCG00000000600	186.66129966023442	1.1033503389655936	0.4066586843812344	2.7132098276578906	0.006663489851476433	0.1347656825063907
Strn4	1765.115350839021	-0.605628446903729	0.2947557544543711	-2.054678959618011	0.03991002349543579	0.3050192798250144
Klhl5	951.310315269662	1.2071813088915615	0.4383035442267046	2.754212975898659	0.005883346924985909	0.12449245841980859
Mesp1	122.89713869515485	-0.4700957451351625	0.5509446772387633	-0.8532539918367099	0.3935184679436658	0.7448227949683389
Cdh7	175.38510387388095	-0.014023686568650462	0.5094560337843369	-0.02752678472464019	0.9780395768175154	0.9929013699431358
ENSMOCG00000000610	125.3349024472736	-0.047848012116647916	0.5858075275489472	-0.0816787252919859	0.9349021965789344	0.9815684732488931
Phkg2	374.6572085384799	-0.4506224006994035	0.41745057737023084	-1.079462875672952	0.2803814347758011	0.6623823894934513
Rbm18	1119.601640498246	-0.21297552857881216	0.29574873937173707	-0.7201231999542547	0.4714491444004791	0.7907868710125043
Ice2	131.70759689798533	0.5852092909756237	0.5276090924233923	1.109172111283497	0.26735594117616407	0.6540623025029711
Secisbp2	684.2921047786274	-0.31233941996750325	0.28042976036643796	-1.11378842088432	0.2653699656078154	0.6511780067945978
Ldlrad3	29.53930331936147	-0.5588059955036534	0.8766231707839426	-0.6374529149211592	0.5238298704999496	NA
Caml	277.5761876417707	-0.06276504876807346	0.3068828058530775	-0.20452448808136456	0.8379436576936605	0.9554538792206655
Fbxl6	122.04721715867704	0.011139298469140293	0.649914245366092	0.01713964349691336	0.9863252126138341	0.995618320041059
Rasl11a	60.54031747430901	0.07618473996436025	0.7964802334516066	0.09565176480803295	0.9237971512701024	0.9773839611124606
Eci1	169.53732564036076	1.1900818394454746	0.5427584068189072	2.1926548248612363	0.028332257855039872	0.26655633735137196
U2surp	1430.429226321831	0.17491855129447872	0.4454023743717925	0.3927202937370699	0.6945260802564999	0.9047927348388235
Ube3a	2833.253043145483	-0.0321110630051638	0.42224569646628335	-0.07604828959512651	0.9393806798603374	0.982445317546693
Nalcn	2218.932238738736	0.23420346264570865	0.50265596044172	0.4659319317329833	0.6412642238676787	0.8825735357629516
Rock1	968.8489610054877	0.70318932774677	0.7847371241831669	0.8960826575889601	0.37020861864616106	0.7284117956552196
Ppp2r5e	1472.5657520574512	-0.35217240714762177	0.24742529193178778	-1.4233484556005356	0.1546351667108707	0.5377520610034265
Npepl1	224.57807660340552	0.21926252355272446	0.5135244263144764	0.4269758405191239	0.6693969246542076	0.8930298662764009
Wdr24	251.24935168608434	-0.3204439110476585	0.3910176654723779	-0.8195126188494294	0.412494005385	0.7585178160895651
Kcna2	2983.7254791557875	0.34854881952260713	0.5661678625181501	0.6156280541469862	0.5381400312168908	0.826496351702346
ENSMOCG00000000649	1066.5022039316514	-1.6659871972921945	0.4230914452275233	-3.9376527606136937	8.228254894143976e-5	0.012307006789968848
Invs	159.56347593152367	0.6631384566948657	0.9269856706987571	0.7153707739570507	0.47437996674223754	0.7932123965830552
Khnyn	142.67255801746487	0.7872040816367035	0.5105496496657472	1.541875667042529	0.12310381001910625	0.49760384389776063
Kdelr1	562.3723854036193	0.9318719358307448	0.36134512366962096	2.5788972225975253	0.009911627137094758	0.16959578404939693
Tmem198b	53.644388295032655	0.9099105380700266	0.7178448431656392	1.2675587861819733	0.2049555577801703	0.5978199292929369
Rsrp1	872.5514673655873	-0.6992888419872075	0.4843356784944031	-1.4438103014855395	0.14879234346525544	0.5329634182195234
Kcnh5	155.75903595313613	0.931569639629801	1.0986391539092613	0.8479304932060897	0.3964766812219688	0.7479220642594627
Ranbp1	1096.5003671445338	-0.5317650134129736	0.3324307510003295	-1.5996264238877422	0.10968148291851992	0.4737857591235158
Rpusd4	186.7750673882247	-0.24283010647932413	0.42442400521683693	-0.5721403678740155	0.5672268828144662	0.8437928326985269
Cmbl	46.360836122030356	1.7774746041690765	0.905961381883708	1.9619761280257735	0.04976526359817959	0.33692428461957097
Syndig1	700.3898735979202	-0.9652836778723307	0.4901640302762977	-1.969307452707649	0.048917795890203154	0.33423924365237045
Mertk	231.91514413829861	2.8325963471173536	0.7845643848600313	3.610406490249615	3.0571750691119444e-4	0.026967235188688758
ENSMOCG00000000667	318.23008090421183	-0.5088129979322098	0.3623400863672662	-1.4042415318532526	0.16024693833610457	0.5446289198893842
Wdr34	274.14021979141796	-0.474884486441238	0.40089728655063367	-1.1845540051597723	0.23619383167025218	0.6233504319180291
Nelfa	267.1477132109469	-0.49078425789749053	0.3306623664860192	-1.4842458883758138	0.13774369995844077	0.5180417710011946
ENSMOCG00000000670	271.1166679942517	1.8306982345042497	0.7423685416319659	2.4660234530948517	0.013662238839252218	0.19480976531940933
Ssna1	276.0978662259115	-0.19359112949627225	0.38472316354661457	-0.5031959284999381	0.6148265270879969	0.8689868329260944
ENSMOCG00000000673	731.1852075754158	-0.2951861755368824	0.38419811073471993	-0.7683176134634919	0.4422985129450455	0.7761271825206554
Plec	3046.1908748909223	0.6303038429877806	0.5248447867414603	1.2009337977825236	0.22977688259635348	0.6193206343631446
Esyt2	531.8854106913408	-0.26770981456889004	0.4200519075606326	-0.6373255537001634	0.5239128093373997	0.8184213020570185
Tmem14c	413.7079113833641	0.2782060239481426	0.41727881274116624	0.6667149528167176	0.5049542257617361	0.8087562582380963
Scaf11	1029.1716887422035	0.35602384337333703	0.2877354545409191	1.2373304636419304	0.21596442261673546	0.6064342181247269
ENSMOCG00000000679	4486.407502522439	0.23668577853201975	0.49263014429723245	0.48045330005062264	0.6309051022810745	0.8779222415547084
Snrnp40	365.2540165782452	-0.2495330163583143	0.25647559193753483	-0.9729308526913882	0.33058766979029963	0.7008349296736086
Crnkl1	478.68404827525836	-0.3678587309904566	0.3076405092407943	-1.195742172896121	0.23179718842822916	0.6200940020515062
Zfp612	539.5274565454594	-0.1568102844616567	0.6010745627208738	-0.26088324841401755	0.7941825434601559	0.9411478631617514
Vezt	862.7910441822573	0.2929035678776469	0.31451417649778163	0.9312889203889759	0.3517041316619507	0.7172810038970876
ENSMOCG00000000686	102.15463780920084	-0.6046383228877044	0.4798747374033244	-1.2599919849073422	0.207672253640373	0.6016171596324764
Tmem43	190.91618082026474	0.9619576055729975	0.49577793948860055	1.940299333538853	0.05234332233579141	0.34591799981798826
ENSMOCG00000000688	427.7959117718808	-0.6484552993858848	0.3123194824654975	-2.0762563201849593	0.03787025082967938	0.300282312435192
Cers4	228.07828412226434	0.8141645472228339	0.5198885921247188	1.5660365692877518	0.11734005620866274	0.48742282156967015
Nts	146.67545773203318	1.5752721489115822	1.0924028011237066	1.4420249996532133	0.1492953211936369	0.5339608901157082
Kcnk3	130.26723801854328	0.29457507027772045	0.7770234273805505	0.3791070640827037	0.7046083607905855	0.9099915971461384
Adal	312.8431243731437	0.05583029760535367	0.48067939893077954	0.11614872143375035	0.907534675959291	0.9719291829261109
Wdr70	342.22322068696735	-0.048910555965861954	0.42281654311795625	-0.1156779619008829	0.907907772834347	0.9719291829261109
Dgkz	4042.88979693413	-0.6857195920886757	0.42933075332677817	-1.5971825609397967	0.11022501884985328	0.4750859993462024
Uhrf2	1133.6387830557762	-0.01383706475533885	0.219492460238637	-0.06304118483293181	0.9497337087703532	0.9849335715267324
Nipsnap1	1875.5392260244307	-0.5689331133115622	0.2324999286789632	-2.4470248939179124	0.01440408899447054	0.2004639568505995
ENSMOCG00000000698	2397.9277206394972	-0.9939273476083974	0.32649520074501553	-3.0442326421350048	0.00233274671602036	0.0752274237540435
Prkci	989.4348897345336	-1.098092038181344	0.6105815664464884	-1.7984362753892293	0.07210789855538474	0.39534676331057417
ENSMOCG00000000700	3325.9618871090784	1.0088823474704747e-4	0.47088954181293613	2.1425031942443515e-4	0.999829052979292	0.999829052979292
Smarcc1	855.7733536840773	-0.2892605392615052	0.43908706410021003	-0.6587771831863602	0.5100388611962898	0.8122781689270162
Tbc1d1	187.900828626049	0.6545217793674013	0.6425661197005529	1.0186061158537583	0.30838999963223374	0.6847225309235481
Slc20a1	1347.4982314960855	0.39186296290859707	0.43078440285315595	0.9096498394863515	0.36300720548507637	0.7240643010804626
Hcn3	140.46169265234533	1.083045917106803	0.6870539833487987	1.5763621831109738	0.11494235842746402	0.4848503407832178
Dscaml1	604.8245534194366	0.04694152990006658	0.4343066507907027	0.1080838384920065	0.9139291880604985	0.9737508532906589
ENSMOCG00000000709	1472.5547937868334	0.1357374945195729	0.37901842416120923	0.35812901396539815	0.7202467671013993	0.9156697193040241
Slc25a37	614.4802293749605	-0.38751269735291793	0.8636697069696372	-0.4486815899941494	0.6536613670668557	0.8877320915514891
Cdh9	207.68693798146361	-0.3309402877421274	0.5948587595992008	-0.5563342262373437	0.5779823936995797	0.8478116721445458
Hspa5	2325.70149533742	1.0364055911449859	0.6418485251601836	1.6147199074522047	0.10637136445031066	0.4673547841789283
Gm20503	85.62415778789695	0.2469431587763266	0.6530947970356661	0.37811227389527163	0.7053471907650497	0.9105841989491897
Kif17	146.2511548380994	-1.2674564394433476	0.5280359580106511	-2.400322213317491	0.016380645796280582	0.20814442803624503
ENSMOCG00000000716	1047.452545675241	-0.260519858294923	0.37671486587130787	-0.691557148116159	0.4892154802907769	0.8010141650773406
Acap2	926.93391518396	0.5645316591919185	0.5365132829075966	1.0522230803540935	0.292697212625381	0.6733922593215373
2210408I21Rik	203.75685507217293	-0.3253411779672969	0.574069447122163	-0.566727910008532	0.5708990555461368	0.8450346059533413
Hspa12a	838.8107284202974	-0.4344124312477193	0.7271797631750786	-0.5973934551629271	0.5502447223476875	0.8330375860163844
Trp53inp2	1195.6925874652982	-0.091300980645525	0.46669590356850643	-0.19563270203875466	0.8448976623059019	0.9582759179915866
Txnrd2	173.764798200757	-0.1867686492781662	0.4787237377621038	-0.3901386844764709	0.6964339987210331	0.9056307395068918
Sulf2	566.8629354823316	0.09371757021420656	0.5257031164668157	0.1782709047723942	0.8585102274160605	0.9605284750170191
Epb41l3	3897.1549267798728	-0.08907476796307937	0.36482853607944266	-0.24415515551580383	0.8071106568579182	0.9449764458793107
Rnf128	173.8223785869796	0.336550084891041	0.5501580410706307	0.6117334652350084	0.5407141167730507	0.8276811066128599
Zc3h3	420.5698011815836	-0.1860338445650913	0.3411571444955385	-0.5453025022828568	0.5855454834040836	0.8520242005949725
Spsb3	512.0695165902315	-0.5816696383180143	0.34713764278475057	-1.6756167197882652	0.09381329168089003	0.44394256453209086
Aprt	183.82214392350645	-0.20696875703671883	0.49223052870628703	-0.42047119178220793	0.6741412702280338	0.895041641794326
C030006K11Rik	147.27679439442292	0.4880384418146078	0.5965202207010001	0.8181423275829443	0.4132759219227478	0.7586224250653825
Wdr75	381.221752484015	0.06814056793851053	0.3999308499343595	0.17038087446790967	0.8647106121882346	0.9628308356190104
Zfp579	127.56044959262306	-0.76873136084836	0.52892931114286	-1.453372586191827	0.14612033364446816	0.5276452868256719
Taf4b	232.26276991067826	-0.3564419382295667	0.5057787749397833	-0.7047388223675534	0.4809727867020939	0.7962868410777253
Hras	1457.030908549343	-0.6818558769129434	0.29759769567657834	-2.2912001229134753	0.021951841866679103	0.23645951402042384
ENSMOCG00000000745	454.7319822440863	-0.5470193797118448	0.4440715009237453	-1.231827258839962	0.21801361845118178	0.6078822861949481
Gcn1	1125.018166422048	0.7588305718757178	0.4200184202537892	1.8066602207998566	0.07081527364763789	0.39257463967754436
Adhfe1	410.64153460592337	1.1573078526978142	0.6999906868626767	1.6533189289771986	0.09826597256551375	0.451753367834579
Brpf3	1169.74262809399	-0.4602403923265516	0.31024329148331553	-1.4834821733810246	0.13794634930358246	0.5183121598477733
Tmem184c	775.2029262842298	0.6921261152523098	0.3858107051853676	1.7939525937202006	0.07282073576574535	0.3971280858980824
Wdr13	3553.8804798320025	-0.5322557216730793	0.2634561386218	-2.020282102582358	0.04335413417362151	0.31533172085180855
Prdm4	537.4226408621776	-0.1606719349987377	0.33614052621939383	-0.4779903714848996	0.632657058117146	0.8794245697138278
Rps27l	81.1019638892218	-0.04525718636325895	0.6157658140075654	-0.07349740004030642	0.9414103129484577	0.9827292346895241
Mbnl2	4958.865410338756	-0.6847175799181296	0.4453782864192343	-1.53738428836112	0.12419923157939937	0.49999230262092664
Clock	1536.974632206897	-0.17094537344688462	0.3589225399323174	-0.4762737204498778	0.6338793850669935	0.8796145678253801
Slc45a4	220.87959243613554	0.031280862581991226	0.5508297418229805	0.05678862306611599	0.9547135767912999	0.9862618214007128
Stkld1	62.80313712103587	0.5879082266533072	0.7212467446123084	0.8151277368597697	0.41499919633207344	0.7602917958484042
Jakmip1	1930.353082514571	-0.5728418145855363	0.36345598199979456	-1.5760968121467323	0.11500349361794068	0.4848503407832178
Rnf145	1008.9329707370396	0.6586447345138732	0.4235423141595548	1.5550860268137265	0.11992558237308677	0.4926269518413637
Cyp4f17	116.40126451654703	2.519256146445931	0.8190743986184446	3.07573542854621	0.002099840800700021	0.0725910081451298
Dscam	481.6292423345691	0.4529761186075872	0.674256952505222	0.6718152729824154	0.5017013044146067	0.807590931968503
Yipf4	596.5168598650382	0.20955778854954332	0.4927920307481274	0.4252458957816449	0.6706574300819603	0.8937021273789004
Dalrd3	126.0859428048512	-0.3447810237765678	0.5001406869556624	-0.6893680773608661	0.4905916669367835	0.8018661592618561
Ctsz	98.5591222270241	1.5057218274327588	0.6796581540235536	2.2154105244216318	0.026731899610652067	0.25901123633932405
Meis2	4394.229906128532	-0.3250629116599006	0.4576586603324276	-0.7102737036021257	0.47753442343905744	0.794764215836898
Idi1	585.4320710829106	-0.027526091324910424	0.5717920411151315	-0.048140039289857814	0.9616046364414831	0.9875131551435333
Mrps25	640.6432323044892	-0.44437963500877264	0.3193105494033865	-1.3916847903680933	0.1640178700439136	0.5483554991740851
Ubl4a	286.9443410794632	-0.6410094836907902	0.3250846873916741	-1.9718230619656292	0.04862980870199642	0.3333600027701794
Susd1	58.62911006104623	0.2583073833642011	0.9351171603385389	0.27622996809371625	0.7823714411203742	0.9383855531369372
Tefm	95.87855878336028	-0.0676987258740546	0.5147142087936806	-0.13152682540611801	0.8953585672948865	0.9691975316103032
Bod1l	2270.7781453554335	0.41453250302951034	0.39039913800953985	1.0618171575455189	0.2883186991390313	0.6711070601216207
Slc35c2	231.63251303347292	0.46972408183550995	0.5098186592162981	0.9213552178682078	0.3568650010254189	0.7194127888709388
Zkscan4	104.52717900926835	-0.5536745652639986	0.5486475775906877	-1.0091625077347215	0.3128967041261337	0.6897486994786731
ENSMOCG00000000801	110.70838595651686	-0.6920655703643002	0.8034654749725518	-0.8613507262249728	0.3890449054285601	0.7398346368599018
Nrros	44.905311581479985	-0.11866133410589663	0.699152117489037	-0.16972176889353022	0.8652289533450473	0.9628308356190104
ENSMOCG00000000803	34.75619909747257	-0.6949941018809248	1.0939509801963578	-0.6353064391936258	0.5252285747706478	NA
Zfp317	231.69182768015685	0.0026374534046301624	0.6469231447618239	0.004076919222918183	0.9967470981076226	0.9987195584262635
Fa2h	244.2108917742243	1.906761502582132	0.8811045273912476	2.164058228400692	0.030459880822934316	0.2774159077335717
Cyth3	432.83377314178347	-0.31312672208307823	0.4382780930353284	-0.7144475780536855	0.47495046066874824	0.7939103478210265
ENSMOCG00000000809	43.453912890039256	0.6114014455494778	0.9415099647518315	0.649383934784625	0.5160902453466617	0.8152870085197129
Chic2	134.14402859743518	0.19702078101538606	0.420253314582583	0.46881434168122416	0.6392023477931187	0.8815254922829372
Foxred2	214.42102356706735	0.2413448946960556	0.3766739053869837	0.6407263451077264	0.5217004943968615	0.8179851030385171
Rhoq	487.9347777371423	0.3094116819142435	0.3872510629954495	0.7989950486407815	0.42429328302477953	0.7653110453102803
Zfp146	1420.255554679705	-0.40013573900780613	0.295684591820589	-1.3532519112480317	0.17597516632456034	0.564851958602185
Emb	70.85109613276326	1.1524702293075282	0.7927153848828203	1.4538259901160957	0.14599455587632007	0.5276452868256719
Kctd16	219.00295632177568	-1.3097977043365427	0.6958074570537162	-1.8824140084423193	0.05977982537741158	0.3660667782637376
Asic4	279.9705816493543	1.2275495304275643	0.7605936620318272	1.61393604983287	0.10654129820333748	0.46748709886828504
ENSMOCG00000000825	111.81786484805605	-1.8998520569657804	0.6234864136039602	-3.0471426730600264	0.002310280247693809	0.0752274237540435
Immt	1854.4436428280546	-0.10526340215367255	0.2888040908749266	-0.3644803016286198	0.7154993807154928	0.9142257843060544
Cmtr2	65.16829253329618	0.45336950854263464	0.7259651900301646	0.6245058506507684	0.53229542922966	0.8224057742495929
Card6	70.5120870797589	0.33292035375755646	0.7401349062999524	0.4498103668990242	0.6528471821011033	0.8877320915514891
Stx6	313.34812817618774	-0.6252110918251518	0.419211036498075	-1.4913994083932538	0.13585666335443208	0.5156742549029385
Esco1	591.5226772933762	0.23307889377668395	0.617150426369598	0.3776695013366126	0.7056761270619192	0.9107671841162777
Paip1	1316.897499637829	-0.5089794461313712	0.41073830512092213	-1.2391818337506328	0.21527816655776466	0.6059717576367244
Rtl6	2141.5509006411903	-0.11476924744418204	0.49944886291663576	-0.22979178844048836	0.8182535658742158	0.9480555196268287
ENSMOCG00000000836	708.7546646183151	0.004657998982897931	0.37028616298052053	0.012579457318644046	0.9899633099284404	0.9969213042314347
Rgp1	254.79847163468352	-0.5454251816877217	0.4441467641109932	-1.2280291690955984	0.2194360183167423	0.6096674487600434
Atp8b2	1263.1298631869586	0.30981970478725895	0.35196574576131656	0.8802552763113525	0.3787210347755508	0.7338684284749634
ENSMOCG00000000841	219.3031007856208	-0.6999702046198719	0.4359928355585371	-1.6054626304195148	0.10839203080307379	0.47078087301320437
Slc35c1	97.49757160348719	0.8353952893597717	0.5216081257532309	1.6015764481303179	0.10924930234294523	0.4732372769510206
ENSMOCG00000000843	2529.325592546768	-0.6085351873179538	0.34942333867613184	-1.741541333854587	0.08158873455420183	0.41713380538201555
8030462N17Rik	1263.9311091231868	0.09082563159162062	0.3435061800815377	0.26440756195437715	0.7914658852165477	0.9397593593756947
Gsg1l	125.52848258916855	0.020163827305224803	0.7116146090020435	0.028335319497589037	0.9773947110159195	0.9929013699431358
Smyd2	366.68064019112296	-0.6178155712111076	0.413858670427772	-1.492817754844962	0.13548489842592146	0.5156742549029385
Setx	1193.9929008800366	0.7195745956021341	0.43151299732977333	1.6675618117064888	0.09540274441778562	0.44526273022618
Map3k8	27.220967768734734	1.3176097982775128	0.9656429631804662	1.364489618334503	0.1724135194191674	NA
Vps13c	2140.06646195955	0.4890439770899102	0.4865927799335823	1.0050374712848442	0.3148788069612975	0.6911234828800737
Akr1b3	885.6381293345114	-0.32162870741239946	0.4340985660229958	-0.7409117020565362	0.458746979707608	0.7855576947427864
Stxbp5l	1047.1542351315693	-0.6178062236494599	0.6534864473740424	-0.9454002085766902	0.3444545957644243	0.7109439116985014
Zfp346	232.35525114771104	-0.4785881183187269	0.4014469517765313	-1.1921578086489915	0.23319937338904273	0.6202654771510838
Fgf13	2797.6227277835683	-1.0974792871016237	0.3156280591168643	-3.477128396544971	5.068150512503699e-4	0.03508832003270703
Prpf40b	691.9846089236977	-0.003118266947171602	0.4051379179825041	-0.007696803505087531	0.9938588999497476	0.9979957296272373
Acad11	162.21021208679315	0.9513535271110382	0.5392745679726678	1.7641357178914023	0.07770913220427048	0.4079986755731499
Slc5a6	181.16323796779758	0.9767177497955611	0.707136160376671	1.3812301004028584	0.16720822251048353	0.5535746609394961
Aptx	194.58016637401764	-0.2923587814089774	0.49298623725184115	-0.5930363959828486	0.5531567949512961	0.8348051236772227
ENSMOCG00000000871	493.9556668090849	0.07392624174474555	0.30735419137712977	0.2405245928598272	0.8099236004057806	0.9458638697039436
Whamm	219.59220516827162	0.8528779910594613	0.578227786587446	1.4749861747269726	0.14021626037690663	0.5193497954067621
Isg20l2	170.303659423947	0.2890228795037282	0.4108431183080761	0.7034872111135145	0.4817521739627828	0.7970223779584604
Shb	298.155610292688	-0.11673993905669645	0.4050280808293538	-0.2882267787893977	0.7731731516472402	0.9350655856742333
Ptprn	2889.5099597269964	-0.21291457593332316	0.5751277290592297	-0.37020398282934486	0.7112305092148232	0.9123021481590635
Parg	863.0556816516449	-0.5534804403582942	0.3730778332288229	-1.4835522002692225	0.13792775832740575	0.5183121598477733
Hdac5	1493.5039758448147	0.1236214955255689	0.39835114316537107	0.310332975432805	0.7563077573586929	0.9301904902791991
Pdrg1	708.6806184990505	0.052550805207289594	0.4131200650660673	0.1272046788598504	0.8987784022721761	0.9702498874201814
Parm1	651.2521394528541	0.5422387371788833	0.4302806776062751	1.2601977392883408	0.20759803819777367	0.6015487013274671
Tac2	147.42301821149513	-0.29478220096878943	0.8528192780639539	-0.34565611795033013	0.7296011664401412	0.9195015972134548
Dstn	2726.3897027950884	-0.07533674617770736	0.5703691249490174	-0.13208419404616503	0.8949176976945936	0.9690731469749816
Ppm1k	1635.9348541114723	0.05120600365638032	0.36732193935909824	0.13940360803311758	0.8891312214021398	0.9674028113543044
ENSMOCG00000000894	121.714367609707	0.1467884707706459	0.9224429551578104	0.15913013368456322	0.8735663474581887	0.9647521363273385
Tmem267	52.01042640758894	1.4047024124056342	0.7673517074832049	1.8305848526913964	0.06716253112838713	0.38311229909117883
Lrch2	658.0423556538899	0.501748028627957	0.5147428510775498	0.9747547296239476	0.3296819377994626	0.7007287943362304
Jam3	290.3203917480087	0.9893147264551209	0.6591208606165728	1.500961030924843	0.13336564109019067	0.5124343146509038
Lig1	420.25307498569015	0.2663753016992779	0.4121431379448649	0.6463174493879665	0.5180737895459975	0.8164960392013306
Egfr	156.81654675030694	2.566381228819912	0.7672856042690797	3.344753524034457	8.235572265388961e-4	0.04395502076690671
Utp14b	130.56420003139024	1.2867198529946753	0.5603218803340163	2.296394087319314	0.021653358742135913	0.23467275156908135
Faim	256.9324499779067	-0.7016650434158661	0.51943529387859	-1.3508228102418267	0.1767521993475458	0.5651888020008106
Brinp3	159.66958903316797	0.6566540717125935	0.5982137754664484	1.0976913248120659	0.2723392991736945	0.6583027574837518
Ano7	51.25450841442284	-0.5255138708642063	0.7831253368274051	-0.6710469527051269	0.5021906189175954	0.8079215160035194
ENSMOCG00000000908	200.03329298033196	-0.4128144761336098	0.4444917924367723	-0.9287336305367921	0.35302714740777036	0.7177162413331449
Prkn	46.23210884946486	0.5127831770663845	0.6468582298118439	0.7927288444881366	0.42793582106179906	0.7683306427887718
Tab2	1545.627661138119	0.6039976768316183	0.3674306419519082	1.6438413345794758	0.10020898074418078	0.45571135717391886
Mmp9	43.61479591839893	0.5999904729371252	0.8787958361779297	0.6827415973505423	0.49477013966471145	0.8039085258768613
Ercc5	727.7264883110819	0.15341653229163424	0.39901412861350183	0.3844889724199178	0.7006160677055995	0.9076943324060344
Sncb	7016.627263213108	-1.1259838283297603	0.592484691558244	-1.9004437487969608	0.05737491029843249	0.3608156706869165
ENSMOCG00000000918	1893.1422409294012	-0.5431667059309621	0.503437003384986	-1.0789169295837282	0.28062476110467677	0.6625351715419528
Rngtt	201.75014701883504	-0.4630099809736898	0.47066934633350455	-0.9837266534999975	0.3252499310357806	0.6989668260652127
Arfgap1	955.3689334458381	-0.2793707716971778	0.4483276425101215	-0.6231397424727623	0.5331926952540936	0.8232572749885331
9330159F19Rik	2855.1042185672236	-0.31198668993143686	0.45253185477274716	-0.6894248142776835	0.49055597231573034	0.8018661592618561
Cep76	105.48151028633524	-0.35576384484366963	0.44435526589718155	-0.8006292985531741	0.4233462840035575	0.764588229479165
Mical2	3589.4586350268864	-1.3862980815013348	1.0995501633834477	-1.2607865722428975	0.20738575293414224	0.6012289551721188
Mrps35	364.9335923606767	-0.11790611235974507	0.34921106877715213	-0.3376356676568762	0.7356377600952624	0.9224981109143523
Etfrf1	108.02408451466853	-0.02625136805471437	0.7781899392011284	-0.03373388260668521	0.9730893599274992	0.9916855487409221
ENSMOCG00000000927	694.1274895152444	-0.4372018069397564	0.2776824282112737	-1.5744669540526812	0.11537953550422281	0.485353178711078
ENSMOCG00000000929	205.72409432694897	-0.7437476819246636	0.6178065879659468	-1.2038519763496898	0.2286467961608833	0.6182509549670814
ENSMOCG00000000934	28.89233460324626	-0.22540969406916261	0.914398734792734	-0.2465113800931232	0.8052863961626127	NA
Scly	188.77827725470027	-0.9037375733080373	0.644527445783703	-1.4021708140126627	0.1608642448290453	0.5446924116393355
Syt14	115.89403840698704	-0.09275029586269345	0.5762476770013292	-0.16095560913207727	0.8721283634706449	0.9646460820433789
Ndufaf5	333.0495394356514	-0.6231035559758966	0.3760608983021322	-1.6569219474535404	0.09753525647846371	0.45085304640551543
Nxf1	1878.412979537068	0.03899285984233935	0.5795961832238162	0.06727590859114044	0.9463620555870949	0.9845148703531285
Samd12	71.3545650920917	-1.118346953817444	0.8055632336893277	-1.3882795379024757	0.16505194056066766	0.5494357176524666
Nkrf	395.79972943633516	0.6740805737751869	0.6010238036858475	1.1215538713131001	0.26205217414164816	0.6480192253883302
Pknox1	389.77114879564147	-0.01899060337922281	0.46728962919443434	-0.040639899096329014	0.9675829755377995	0.9893359859731032
Vps35l	988.4617862646944	0.22886561399342423	0.29932097365573807	0.7646160280657527	0.4445002220660219	0.7775093827521173
Psmd6	1025.8227743509133	-0.5258872831702853	0.24745141507861687	-2.125214289048247	0.03356873626708721	0.2889602171134558
ENSMOCG00000000948	1582.7572429454754	-0.3190071817854156	0.2788501688745645	-1.1440092830960953	0.2526197871636629	0.6399159037475758
Galnt7	344.5229187542386	1.225077145557249	0.5665208127238437	2.162457438530904	0.030582934328852382	0.2774159077335717
Fam162a	673.2539598528288	-0.8353056365552062	0.4493155212691668	-1.859062500658214	0.06301827979770616	0.37321383633183347
Prps2	1571.8081322156725	-0.22769472590801806	0.6746556041783173	-0.3374977166095494	0.735741733163208	0.9224981109143523
Gpc1	991.8466467837623	0.4919281574850895	0.42659013488823966	1.1531634635994745	0.24884329683406756	0.6363966636453187
Sfrp4	60.75676140085367	-1.3276414505158678	1.1057419984697574	-1.200679229289652	0.22987565422796166	0.6193206343631446
Thy1	5419.596952421603	0.12228094700451063	0.47751872209201063	0.25607571252661576	0.7978923754546782	0.9437208642659506
ENSMOCG00000000955	2273.906704526151	-0.23833147975874555	0.5404263810945807	-0.44100637588422026	0.659208381173058	0.8900211249897826
Hs6st1	697.9697924128079	0.47927907813922427	0.5266284435357692	0.9100896163552379	0.36277525018820667	0.7239676582040868
Rfx4	264.85818770442086	1.8441761725309556	0.4947130550488801	3.727769367939445	1.931820378731539e-4	0.020644493061198532
Tmem91	242.30461937487	-0.26082128182902986	0.5745859050908912	-0.4539291331689935	0.6498798341183134	0.8869931122845154
Sin3b	1975.0225917691353	0.12443203548047987	0.3485196896345507	0.35703014544445477	0.7210692381951427	0.9160481662376481
Tspan4	139.61263170257726	0.9294953050055761	0.630225663626909	1.4748610833401945	0.14024989491158008	0.5193497954067621
Fli1	50.49665988950728	0.9441756251426825	0.8622244601509002	1.0950462075472085	0.27349639338183407	0.6586878074866975
Fos	364.41715577051565	-0.28954662972518164	1.3537317701510507	-0.2138877406215219	0.8306346005853229	0.9526383132568869
Nos1	449.0967519308624	0.9280616850243572	0.7183353129729712	1.2919616622819117	0.19637042162327792	0.5891987994889344
2410004B18Rik	286.2441613072638	-0.8303398291942767	0.4122377232327881	-2.01422573044192	0.043985839417755315	0.31646656310827903
Jmy	264.80667877172914	-0.8685070278513196	0.535746206564527	-1.6211165234759601	0.10499265092890052	0.464507530232218
Nars	2978.3000473129346	-0.5613371038396135	0.451649923600206	-1.2428588482093956	0.21391985239747033	0.6048609362270535
ENSMOCG00000000975	82.86636356497036	0.5862362735382022	0.5807223805717341	1.0094948862846298	0.3127373528629275	0.6897486994786731
Acot5	255.7312491943672	-0.9184418684961694	0.5607174933493346	-1.637976127711014	0.10142667375593782	0.45880334823283025
ENSMOCG00000000983	1270.7724896611721	0.2937541888756639	0.39742533163173427	0.7391430930423554	0.4598201119309463	0.7858604930573665
Tram1l1	267.9322723552826	-0.420103665426948	0.3967176261230812	-1.0589488284964967	0.28962308495566624	0.6717656247338635
ENSMOCG00000000987	78.05439525618134	1.8139019680431323	1.141415468412916	1.589168903208642	0.11202226505795126	0.4774592658085611
Igsf9	47.68922258526814	0.08191607201244694	1.0475818315163132	0.07819539204290918	0.9376726274130837	0.9822276014481337
Syt7	4225.557622913127	-0.41276643674240987	0.49661109449330204	-0.8311663620071963	0.40587965469500725	0.7537313720289485
Sec61a2	895.9914266203097	0.2957857376197641	0.4074203729444095	0.7259964333205365	0.46784095706362167	0.7885988180581983
Gtf2h5	291.32574759893294	-0.18252515153352356	0.4178168990938491	-0.4368544018429593	0.6622169425542459	0.8910127567375284
ENSMOCG00000000994	247.67661447968578	-0.17613152204315866	0.7162992940532441	-0.24589096136965677	0.8057666408476775	0.9445198424642516
4932438A13Rik	2651.3408496177985	0.8660491678090771	0.5382168043441137	1.6091083756934519	0.10759264613376673	0.46988312442995
Rasip1	40.64791469547419	-0.5550611008695441	0.7684801654234455	-0.7222842252066403	0.47011974944314755	0.7901673291773317
Polr3c	258.19551108581874	-0.06047479579791182	0.36071736966864654	-0.16765146589271182	0.8668574802390375	0.9632736288933174
Sgsm3	735.4613719608127	-0.7396248882345112	0.3686142363331251	-2.0065011476282084	0.04480280643738975	0.31903321002473717
BC024978	100.49765136860724	0.1812012387902348	0.42529249454546186	0.4260626301056559	0.6700622097124012	0.8936166645620585
Ankrd16	115.77693363328655	-0.0833674028680882	0.6751607631899917	-0.12347785507290866	0.9017287091767031	0.9711579128838419
ENSMOCG00000001006	570.9761137813327	0.26578603072692386	0.3500190525079501	0.7593473235885837	0.4476448155619003	0.7795393897667764
Clstn2	192.74504122758358	-0.32959165426793113	0.8935639602081179	-0.3688506575300628	0.7122390435359821	0.9128205130301338
Tmem183a	529.8051202582044	-0.632811277056023	0.2853089037005754	-2.217986431016337	0.02655575761106396	0.2578039369896427
Prkch	480.5223783292449	-1.0699972194389922	0.8506433501698424	-1.257868199669524	0.20843942602948556	0.6018431623603168
Caps2	48.850322832333354	-0.002237599049177566	1.1680952133143616	-0.0019155964545292388	0.9984715760989635	0.9995541808745033
Zfp869	379.1172174097429	0.46993622165168447	0.3576763306174664	1.313858875817756	0.18889370013881512	0.5812860412467352
Snx27	4101.230508661103	-0.218954813612748	0.25735309037349013	-0.8507953539434258	0.39488304297990295	0.7464551179648714
Ankmy1	131.4182408683736	4.135783001084079	1.6278827060271581	2.5405902930054722	0.011066551476076643	0.1789478337932789
Rbx1	852.0419638044967	-0.49142242191085395	0.35271083286136995	-1.3932728346452672	0.16353730208692202	0.5481357374345199
Ric8b	1785.5320070331425	0.08984901121465255	0.46798971996290917	0.19198928391370135	0.8477505994797181	0.9593609754929882
Atp6ap1	2432.0445492433973	0.5327095255379735	0.5425881867039355	0.9817934459171107	0.32620161770038625	0.6990845240252429
Ash2l	2757.273777650516	-0.756333180669073	0.2968783849289133	-2.547619560953132	0.010846067985171647	0.177172308351183
Mafb	63.33571065861341	-0.1523881025925449	0.6077391311691411	-0.2507459118180979	0.802010561832314	0.9438207509304681
Vapa	3177.534888597127	-0.6166097505025929	0.438579602990825	-1.405924366518003	0.15974658492736643	0.543834671032018
Plekhn1	283.9780009172961	-0.21463260642143192	0.6390307885886736	-0.33587208981817146	0.7369673247395394	0.923208198230549
Fahd1	155.2548352568283	0.308695751874629	0.40525127483684703	0.7617391259260294	0.44621571860469866	0.7789353482209518
Lrpap1	977.7355505290689	0.6321906939363127	0.4420199829376049	1.43023102651346	0.15265072331371307	0.5363378023316174
Rhpn1	469.3490977856894	0.18830405966272104	0.8378703331542708	0.22474129016339098	0.8221805412561232	0.949447864049973
Tiam1	1528.787219006478	0.281871649243968	0.6301548002205515	0.44730540677515135	0.654654563696259	0.8880008822176739
Stau2	1746.3835248763373	-0.5751920865784145	0.5067503245415883	-1.1350601247246153	0.2563501274684222	0.643167784321744
Ndufaf4	1046.2344836655207	-0.6661653169709439	0.5158930301902237	-1.2912857472125778	0.19660461102424653	0.5891987994889344
Cmtm5	218.62470787456328	2.9791345793705597	0.8059583247251738	3.696387875125459	2.186887771403496e-4	0.022227751604726814
ENSMOCG00000001041	559.4810126358495	0.4041337502197369	0.2207353801299295	1.830851719293279	0.06712267832113887	0.38311229909117883
Prmt3	393.1671386541869	-0.447793033203162	0.25037440265136823	-1.788493665731028	0.07369639669573584	0.3995398186916479
Gtf3c6	466.93720837260827	-0.43738066680855053	0.5245550195382548	-0.8338127565599498	0.40438650572566504	0.7530380279423571
Inhba	58.767269717424966	0.9390964456230753	0.9256520027134489	1.014524295167315	0.3103326425944475	0.6872394386840167
Fam122a	182.46936868698862	-1.04712499569139	0.44330291089386303	-2.3620981725114274	0.018171829316895136	0.21910664121204018
Atxn7l1	268.55048408875	0.007906799143546889	0.5331940373080855	0.0148291214647966	0.988168506564399	0.9960416918175822
ENSMOCG00000001053	593.876905102218	1.7945917129049767	0.5757162193591122	3.117146351900104	0.001826108936596351	0.06666267943872822
Ggct	359.77003304442627	-0.7264920581749622	0.7503375525350987	-0.9682203106061107	0.3329343534145563	0.7024938486170873
Golga1	851.7688677274451	-0.06091068021438314	0.45857851863864213	-0.1328249748706186	0.8943318022716565	0.9688798207720268
Gatad2a	463.07282041816006	0.521402392745889	0.3181423970707862	1.6388962852690072	0.1012348615077681	0.45850953348569945
Dtd1	370.0285467964552	-0.5220447054454029	0.30313290420172806	-1.722164430879447	0.08503973616129173	0.4245665440589208
Pou3f4	136.1493528209302	-0.6801715978180529	0.9077705784843778	-0.7492769802626493	0.4536902794177289	0.7832480746285045
ENSMOCG00000001064	28.59624174548678	-1.8109416153939109	1.227629060061164	-1.4751537531244858	0.1401712116719827	NA
Tfeb	111.40034568826906	0.7934248886293442	0.7072913526293556	1.121779427501534	0.26195623539690044	0.6480192253883302
Cuedc2	670.2113882665323	-0.11518282520535182	0.27161959870242874	-0.42405933060647694	0.6715225444220754	0.8939601587671914
Tspan6	353.4668258052891	0.10387863911373658	0.4821480085181114	0.21544969029947675	0.829416732259985	0.9525276465510133
Inafm2	61.85085702806964	0.8676180558270784	0.9767864455811196	0.8882371983682742	0.37441317328991364	0.7316006337107547
Cast	340.28041317258857	0.7619647227212119	0.44236649285608565	1.7224738650562772	0.08498371315544041	0.4245665440589208
Dlg1	3554.6598504721637	-0.7378461300630776	0.38069229074092337	-1.9381693509659539	0.052602564683348965	0.34616868271182843
ENSMOCG00000001074	3601.431755553034	-0.378141290027775	0.34722268874686535	-1.0890454520483543	0.27613384265807395	0.6609870484882882
Npy1r	140.8861520064722	-0.4575013650834763	0.6936211239998915	-0.6595839562169215	0.5095208527756746	0.8120412339859017
Nsg1	2272.280281466108	0.5786142543658932	0.4825831024221017	1.1989940208469956	0.23053027053677475	0.6196529077516456
ENSMOCG00000001081	609.2480028617588	0.25613343116995924	0.35587651911769613	0.7197255716813683	0.47169397845795974	0.79083389141718
ENSMOCG00000001089	1699.9387766765756	-0.6517264688965841	0.30791116949868913	-2.1166054805925407	0.03429334459911145	0.29116903809312417
ENSMOCG00000001091	522.2709634107009	-0.7920867031578005	0.36123411750886747	-2.192723955921347	0.028327273672571627	0.26655633735137196
Abcg1	549.2215492793486	0.8602180196598752	0.46737650515929663	1.840524737902017	0.06569123582734128	0.37848845758660005
Ier5	121.31697631458991	-0.8345242986901015	1.0691126005389884	-0.7805766186549291	0.4350515479634968	0.7713710467779403
Rnf122	48.64489229001299	2.3477817366957003	0.9730229080335914	2.4128740621743394	0.015827287305477847	0.20503061071540585
Hilpda	125.05324739097603	0.23130518162482433	0.4612376375713498	0.501488089399563	0.6160276581888884	0.8699639081341763
ENSMOCG00000001098	227.7374492629618	-0.4710771917951529	0.4715156149149955	-0.9990701832431962	0.31776069392952794	0.6942513636248293
Stk4	1020.9684013859868	-0.48940869693458544	0.3945795937341777	-1.2403294663643774	0.21485355781328352	0.6057732813543881
ENSMOCG00000001103	675.8071193698491	-0.6000977685799332	0.26015152068034797	-2.306724046857609	0.021070208808883047	0.2306804575154728
Slc30a4	325.45545907656447	-0.5374482809968699	0.5734446131276771	-0.9372278833792225	0.34864134977272937	0.7144654371010335
Thop1	528.5992973568274	-0.1633352158245348	0.3446177314380359	-0.47396056825910404	0.6355280263822435	0.8801326761077956
Ap3m2	1662.7383848510597	-0.39110575997015523	0.3781358482222813	-1.0342996090131338	0.30099611959546785	0.6792117370454086
Katnbl1	201.2776656882219	-0.030295920924703935	0.5610811579166035	-0.05399561275092218	0.9569386596619013	0.9867263106476485
Zbtb5	183.03156608028775	0.45141642016193056	0.34998126897013065	1.2898302286013397	0.19710960994692728	0.5893958967786923
Fscn1	2540.7546932370046	-0.8740915831348505	0.6113513900158631	-1.4297695194774478	0.15278317998278043	0.5363378023316174
Rrp1b	312.10971156129557	0.0601714781444167	0.35307822030293984	0.1704196823377828	0.8646800942827113	0.9628308356190104
Pkn1	500.3770057320923	0.15363095633165738	0.33464399639733455	0.45908774095933863	0.6461711596445096	0.8851909873372045
Igsf10	61.623034067972	1.4575920950467989	0.5956352552886323	2.4471219292425537	0.014400211459665248	0.2004639568505995
Iqca	64.42443097726343	1.3863183353680353	1.295042873409001	1.0704806488133987	0.2844030147626633	0.6652479645077874
Med27	356.7426369504823	-1.0887360017459211	0.3549071424119015	-3.0676643877804675	0.002157387633512433	0.07372314292451106
Rnf144b	326.8030153769516	-0.8867975410235363	0.42418263390158617	-2.0906031274002617	0.0365636551796005	0.29650407453692657
ENSMOCG00000001129	74.42155612933931	-0.22505059783081025	0.5830269007052782	-0.38600379769538967	0.6994938562191646	0.9070583696341163
Plod3	323.2652766644338	0.5750215389838248	0.6062518570013958	0.9484862311646509	0.34288197901871004	0.7099176625944547
Sin3a	867.7831560363354	0.3950094080935929	0.30200390953728834	1.3079612402991796	0.19088645614727878	0.5833337067970675
ENSMOCG00000001133	675.1751166832436	-0.46584046411200525	0.444942585220266	-1.0469675854501406	0.2951145284483631	0.6758139750255987
Mro	166.15859616714155	0.09881546964168447	0.45989695169496336	0.2148643718500356	0.8298730632570128	0.95259992518073
Plpp6	55.40786733656726	0.9238707070106655	0.7597541041146543	1.216012788884184	0.223980050279624	0.6132968759641121
Marf1	3409.4210991728064	0.23691705017495904	0.3639333848873269	0.6509901537291175	0.5150528429176768	0.8149815937330827
Tril	201.35504811853968	2.9506458562746123	0.8434017136645046	3.498505882154687	4.678727691569147e-4	0.03392648152935384
Prim1	134.15272744902535	0.1120034557366843	0.5426488697736002	0.20640134343855454	0.8364774215131245	0.954318609828425
Lpl	37.764377856987224	-0.025781716531522576	1.1247149950492514	-0.022922888594006513	0.9817117827333779	0.9941203760318514
Cfl2	702.9987647953935	-0.22633662327589862	0.36032523762257257	-0.6281453521525958	0.5299087256591611	0.821240012475251
Cers2	434.66701742189986	1.314545359896287	0.6649057982447294	1.9770400008039142	0.04803710887463778	0.3307801382380964
Ist1	963.2819544688534	-0.006037320855324954	0.20493931190692866	-0.029459066682466215	0.9764984648163233	0.9928534045434432
Csk	469.7173368486856	0.32617610771766903	0.3787068989000516	0.8612890566954089	0.38907886132877784	0.7398346368599018
Qpct	101.3704039253658	1.1300702148789326	0.6749010906990259	1.674423453232928	0.09404740667894641	0.44443154781160293
Klhl24	2432.374291927481	0.6023015443382554	0.32522281149293164	1.8519658617222974	0.06403072522341467	0.3741805615117219
ENSMOCG00000001151	98.25166357172056	-1.5093548528595462	1.1298195684102514	-1.3359255717117131	0.18157360175464465	0.5702958933631357
Pcdhb18	36.627420429038025	1.12129639629383	0.7924306535256626	1.4150088607816802	0.15706589807840066	NA
ENSMOCG00000001154	132.0954498931636	0.23858740113023089	0.5455945502873822	0.43729799171300227	0.6618952516180135	0.8908854223913917
Stard4	143.4051207874321	-0.817933576341381	0.7549446648930972	-1.0834351368748374	0.27861532672002454	0.661486507966608
Sh3bgrl3	1717.307817782848	-0.6051348940236189	0.35562619207337104	-1.7016038399634255	0.08882965720356363	0.4308165919513779
Ppp1r13l	51.818254986363854	0.9545671821346148	0.7686219741293924	1.2419202342163584	0.21426599370429528	0.6050860410989883
Lum	67.2523382567147	0.3684051126482873	1.3589449239148592	0.2710964264739905	0.786316869963865	0.9386393482107406
Dock4	1471.9945038092287	0.021664214922973192	0.5761759793488136	0.03759999670145534	0.9700066105532689	0.9904019793133523
Dennd5a	4574.598223849353	0.3993458298746225	0.26770728195575094	1.4917256899296074	0.1357710715230448	0.5156742549029385
ENSMOCG00000001163	158.2679383281872	1.116792719426229	0.8270100481301185	1.3503980053825384	0.17688835031509273	0.5653201456455477
Gucy1a2	167.0418349238453	-0.01900055146361621	0.6773639812461405	-0.02805072603456278	0.9776216935193521	0.9929013699431358
ENSMOCG00000001169	128.4485832598666	-0.07492999886477407	0.49135662599939395	-0.15249616042598454	0.8787956185579641	0.9657270666544544
Epha3	45.08956444499318	0.8036841058198553	0.8203661179912048	0.9796651619252656	0.3272514282025539	0.6993003617977555
Kirrel3	288.7867563719494	0.42053737176117373	0.6169479326645798	0.6816415932295701	0.4954656077613376	0.8043777346293096
Slc1a4	608.2291225790714	1.1751675082300175	0.5520909657074924	2.128575871050645	0.03328936658172282	0.2877014152542498
ENSMOCG00000001177	73.18316357265726	1.4614347850267042	1.0491843267400511	1.3929247204517128	0.1636425561544799	0.5482141344496678
Maml1	245.66154808748408	0.16422769273038082	0.30254271176315484	0.5428248189265463	0.5872504232463276	0.8530086763460765
Kcns2	108.64346112616828	-0.7733227932994002	0.7663317288334244	-1.0091227652502635	0.31291576132588644	0.6897486994786731
Dixdc1	1986.1006338380575	0.27976156618059245	0.3079343839690703	0.9085103214998309	0.3636086630443178	0.7240657314898874
Rbm46	50.74712970563992	-2.0918841466539897	0.8930241555813958	-2.3424720748926284	0.019156467472891653	0.22272827373982673
ENSMOCG00000001189	34.10612353024728	-0.43545862722044887	0.9020967491267237	-0.48271832000502757	0.6292957535122616	NA
Ints13	543.6739574705764	-0.13858192746595657	0.4427111262187938	-0.3130301437182934	0.7542577607970564	0.9294956778651394
Mtf2	611.7056418344149	-0.32059848011901354	0.41245712049158306	-0.7772892361196512	0.43698814413977294	0.7730398007883789
Aox1	180.09945301558878	2.175376828736808	0.7373534989408834	2.9502495504008137	0.0031751735430844896	0.0894766914084378
Kcnb1	638.4607673280223	-0.4590808498420478	0.6904679484786297	-0.664883650071784	0.5061249139965176	0.8098528372023638
Lmf2	62.02516930416152	1.7536387008128327	0.6617507716564858	2.6499987244792287	0.008049207474196282	0.15169758364998762
Ncaph2	782.054852342826	-0.15705757117313035	0.2348979709459392	-0.6686203824607599	0.5037376671966204	0.8085084395285232
Rfesd	195.86788420534418	-0.9451104167686566	0.48730653614634994	-1.93945770611379	0.052445629716836306	0.34591799981798826
Ptrhd1	116.3408187539224	-0.6293502098639768	0.47676709891478714	-1.3200369977217346	0.18682266570813788	0.5783726762319944
Tmem125	130.2003497941346	2.357441472471628	1.1439721270216228	2.0607507969703085	0.039326820750410586	0.3037407130809684
Itpr2	304.66546596349866	2.6670676240541384	0.6718273044825583	3.9698708377271372	7.191160366638536e-5	0.011106140140268244
Ubqln1	4673.503751919432	-0.2729961790325473	0.3052892962797792	-0.8942212595045023	0.3712035196582664	0.7289996033617685
Nudt17	51.5656200856146	-0.0861333822923198	0.6896064128052076	-0.1249022350908007	0.9006009488836224	0.9704554624976476
Bccip	572.7138747493979	-1.0204448032402635	0.34403647376157076	-2.9660948215260086	0.0030160748420516364	0.08701072475779326
ENSMOCG00000001215	588.5143066289853	0.7490787562040061	0.36703256636790066	2.040905425959275	0.0412602283936507	0.3088094780072077
ENSMOCG00000001218	209.52491490783697	-0.6564287044849084	0.4429545184442621	-1.481932517113511	0.138358251796585	0.5183235729246868
1810010H24Rik	253.66977168565558	-0.04059674204538204	0.34547031915221743	-0.11751151920954093	0.9064547162791509	0.971820122983156
ENSMOCG00000001220	624.5073268442328	-0.8135083769140894	0.5426705341797697	-1.4990833768848035	0.13385200345391768	0.5129900007689376
C1qtnf12	29.023400213126365	-1.0444059517621798	0.8268339219787001	-1.263138731975107	0.2065393266316351	NA
Amer1	69.91307467112883	1.6457547013318268	0.7898785688413272	2.0835540629314506	0.037200749205257566	0.2982909858965732
Ralgps1	1373.1681316469808	0.05949827213008703	0.3691324872927934	0.16118405769821445	0.8719484370503598	0.9646460820433789
Psma1	1011.3085810908074	-0.41727154409002154	0.22303520628163967	-1.8708774773571317	0.06136206547514775	0.3691035319324517
Has1	98.05511837757163	-1.2797418684005075	0.6391936709618273	-2.0021191174731356	0.04527192189171505	0.32084248816226185
ENSMOCG00000001232	282.13434768551406	0.8664464960107594	0.45694987405162	1.8961521716337753	0.05793992550999092	0.3626429442972695
Zfp69	32.021240218795796	0.3823823435904834	0.8365743274447768	0.45708113558591706	0.6476127288753344	NA
Pnma3	972.2749318211565	0.23694739378908897	0.49165684944371973	0.4819365255608271	0.6298510380168838	0.8772837994107943
Apln	104.48034018764756	1.2871494221218767	0.8534039826676149	1.5082533574526307	0.13148969581711745	0.5095065046129555
Gclm	417.0580689165484	-0.4684655217693302	0.3307492011716701	-1.4163768804574697	0.15666518924806846	0.5404880854476444
Aip	888.88696967353	-0.6249030602873749	0.24400157477288797	-2.5610615868730466	0.010435285559276664	0.17453785635853458
Efcab1	114.75212342777276	3.072640070732318	1.206913257570379	2.54586653304133	0.010900685744003017	0.17757665050367658
Pcmt1	1557.5516714833948	-0.5659813694730892	0.37186969648052604	-1.521988413763444	0.12801198383369963	0.5036472874360411
Trim32	1004.8465065259812	-0.08573014332432742	0.560128066738726	-0.15305453951536516	0.8783552655992428	0.9657270666544544
Scmh1	1375.1931984135142	0.06668705047781337	0.5017564042789727	0.132907223324121	0.8942667542017237	0.9688798207720268
Abcb8	393.57297425857263	0.08952265798416706	0.4938405657587242	0.18127846149420046	0.856149011173972	0.9604675919083702
Arl6ip4	1130.8752100593108	-0.6365718115867416	0.31821234569216894	-2.0004623334210483	0.0454503633158906	0.32134109426431096
Nfyb	881.593970019169	-0.03045833448889573	0.5016549756994139	-0.06071570295187509	0.9515856256062908	0.9857366079886768
Kif20b	102.32118604910347	-0.14406577930651715	0.8126363121700048	-0.17728198598683634	0.8592868997743562	0.9608500058407753
Gna11	1814.406161510603	-0.1466812958721927	0.3980366911219634	-0.3685119968682679	0.7124915013827047	0.9128205130301338
Cript	730.6660892033146	-0.9329949754644679	0.6654663617289491	-1.4020167346106756	0.16091024951404798	0.5446924116393355
Slx4ip	31.203355331941363	0.07856430090617596	0.813325600364917	0.09659637034777499	0.9230469390591649	NA
Smad7	163.1659178329706	0.1125862885197679	0.5412195150768513	0.208023335048776	0.8352107471567529	0.95418292532786
Neurl2	152.94329861978827	-0.6292339250918548	0.6154417103691682	-1.0224102697141106	0.3065867619212947	0.6839486826287627
Gspt2	311.88682649979614	0.05630437122949453	0.6113590928372048	0.09209705374331856	0.926620929277723	0.9782709683301051
Papss2	52.07250004792576	2.5820962948688413	0.8126790520370648	3.1772644913100043	0.0014867138264649095	0.05993220618413798
Zfand2b	253.61163753544383	-0.5132939123030665	0.3411658575057385	-1.5045289586002397	0.1324452227555518	0.5120411537740643
Gnb1l	44.6668086471308	0.0017381299431202784	0.872946961276736	0.0019911060124181675	0.9984113283034856	0.9995541808745033
Dll1	108.02396353207453	0.4844649745797041	0.5443715645684607	0.8899527567420861	0.3734912541019248	0.7308800384696544
4931406P16Rik	476.2127850744843	0.562605578597788	0.27376410703751225	2.0550742925576344	0.03987182951247406	0.3049233418407341
Prkag2	1391.3349749080949	-0.8668804415334294	0.34370128436647474	-2.5221914521829656	0.01166262140529265	0.18248933388386868
ENSMOCG00000001288	66.4127753358451	0.9766988808345517	0.6417548927900122	1.521918869349604	0.1280294105212876	0.5036472874360411
ENSMOCG00000001290	89.72888182349844	-0.3231807161187969	0.5585093040090455	-0.578648759830799	0.5628261968528554	0.8412782654370347
Tmem192	257.60312317585596	0.25215557218899076	0.44712200510355565	0.5639524991184236	0.5727864597732999	0.8465792418125879
Phf21b	108.34298058111064	-0.9027280381164499	0.6014108879660901	-1.5010171185449992	0.13335113396879086	0.5124343146509038
ENSMOCG00000001293	144.2693528898601	0.43648900512647376	0.8516424353746651	0.5125261342037848	0.6082828346160369	0.8662881233439365
Polr2j	469.87759470965926	-0.7704003145502407	0.4838394998834597	-1.5922642007025132	0.11132535317096108	0.476302680525582
Zdhhc24	109.34006357247154	1.093046462353672	0.7445729862218686	1.4680178875412018	0.14209936412400492	0.5211619069009072
ENSMOCG00000001296	54.95029937652401	0.6010400549348291	0.6354335213709141	0.9458740131274741	0.34421284947867575	0.7109439116985014
Taf1	1789.7900222872192	0.5001655812990131	0.4900555489137933	1.0206303803877512	0.3074295901969271	0.6839486826287627
Kcnj4	1057.4724709355974	-0.40484599122217496	0.8442829283870715	-0.4795146006275381	0.6315725837630698	0.8784399024690557
Idh2	511.1821064377481	1.553125356762175	0.5433571808220002	2.8583874688332633	0.004258001055650489	0.10451677859115642
ENSMOCG00000001310	39.92417798229526	1.068744427470762	0.7991455362739992	1.3373589402172756	0.18110550032335646	0.570216205942641
Tasor2	819.465185298747	0.7249073054791076	0.29751728524272286	2.4365216457514665	0.014829281892401522	0.2018061828843553
ENSMOCG00000001313	2431.591697415578	-0.47715677119505656	0.31235307028702086	-1.5276199166430404	0.12660693385386768	0.5022845577989749
Mdh1b	32.05569786470564	0.9690007142279495	1.0316921989162195	0.939234313534476	0.3476104552117714	NA
Ufm1	1094.4748556366021	-0.3581695043135125	0.2998775470619487	-1.1943858679073491	0.23232706231827763	0.6200940020515062
Polr3gl	669.0129447999518	-0.5398452549960423	0.3627494330617255	-1.4882042693756108	0.13669703168406844	0.5165557994238773
ENSMOCG00000001318	68.68427073362213	0.4159486839020545	0.7302700779689338	0.5695819895276459	0.5689612468917631	0.8444088567160306
Fras1	470.92203323837964	0.9724233827578842	0.8554912797048149	1.136684155440388	0.25567034533545685	0.642350961807417
ENSMOCG00000001320	56.92804638023909	2.4043253460292795	0.9749670338148404	2.466058094930309	0.013660917570875102	0.19480976531940933
Atf5	109.22343359407635	0.12911438584578794	0.7988592563216733	0.16162344596254885	0.871602392852917	0.9646460820433789
Cdk5r2	951.5297250767215	-0.6413229852933219	0.5516642649664937	-1.1625240676632802	0.24502265425392503	0.6328254951315253
Acvr2a	918.6148220354465	0.464767515151496	0.49409212577694933	0.9406495082686432	0.34688450193069037	0.7128169105845398
Zgpat	336.5061264359364	-0.12548501593822825	0.3619372595975156	-0.3467037797594288	0.7288138703215381	0.919057352808837
Pbx4	73.58200160369779	0.20645943078120502	0.7614632520020573	0.27113512075386037	0.7862871104597187	0.9386393482107406
Mysm1	991.536630142096	-0.07926840569541355	0.6465664977379394	-0.12259899944203716	0.9024246467968539	0.9711579128838419
Mecp2	397.01375531133107	-0.056626114782121956	0.5560495840044172	-0.1018364484230459	0.9188864943714123	0.9751237060323895
Mcat	217.135984829933	-0.6169026728939068	0.47168512776316984	-1.3078696710650792	0.19091751806539461	0.5833337067970675
Gprin3	312.85525216281917	-0.4228809907905946	1.0424248153944267	-0.40567049493213314	0.6849847242347938	0.9006163974162931
Slc43a3	44.37317983274228	0.40847682166620863	1.2907469317757443	0.31646546012257176	0.7516492378297384	0.9283012500022066
Prkacb	13373.200472500243	-0.6645188695785171	0.3739769865842326	-1.7768977595332445	0.0755850630925689	0.40289447346339285
Actr10	1851.5343748987784	-0.6147220296824107	0.2585611229462722	-2.377472771922278	0.017431729877882107	0.214150962508031
Gar1	141.02239599738795	0.3846068110518436	0.5015899450593042	0.76677536071097	0.44321508827277206	0.7771621689383376
Psma4	1368.269048547145	-0.3898898609530068	0.3020105542621634	-1.2909809125894285	0.19671029628325767	0.5891987994889344
Notch3	118.35713704238523	3.4731737111391836	0.9279988830374684	3.74264859001878	1.8209079254759178e-4	0.020080547733030748
Lrrtm3	348.15966843617525	-0.5162406126163428	0.6109523850202705	-0.8449768349774339	0.39812377291296885	0.7491278334621876
ENSMOCG00000001346	312.3079347819932	-0.13520601709655466	0.4473582654904628	-0.3022320755565365	0.7624751541076992	0.9318008974050723
Hps6	71.59562591133493	-0.5214890806632957	0.6150111195663943	-0.8479343934967629	0.3964745089686706	0.7479220642594627
Spin2c	95.50351871901601	-0.8271252235502111	0.7274329242046215	-1.1370467242111617	0.25551875354734654	0.642350961807417
Sem1	722.6258679497765	-0.1801281608124607	0.5332160510116049	-0.33781458842194606	0.7355029155538619	0.9224981109143523
Kif5c	12659.726364497441	0.03245579958050131	0.37866462011809265	0.08571120156506686	0.9316959973390685	0.9804202106323513
Trim21	210.9297487849144	-0.4794787196903771	0.7914643723742715	-0.6058121330869444	0.5446395119019449	0.829537870893532
Pcgf1	197.67412347331464	-0.9379171677280714	0.5030264100628562	-1.864548558416392	0.06224470913138163	0.37176145917013437
Atp2b4	2048.6505810765734	0.36942256279145574	0.8044885583179053	0.45920176113365313	0.6460892860034453	0.8851909873372045
Fam53c	1125.4448026682717	-0.043826050226168166	0.32634834994437983	-0.13429223783002894	0.8931714909597411	0.9681519798097933
Sdhaf2	240.60696727111343	-0.3200856450293103	0.4095012322110748	-0.7816475747851332	0.43442171938610336	0.7711067344034434
Pkp2	126.67311359958514	1.1559364569169022	0.6306364270712697	1.8329681053870794	0.06680731437265378	0.3821416943336213
Scamp1	2846.3878927139463	0.5070689739328933	0.41140437017581755	1.2325318122318258	0.21775049072385125	0.6078822861949481
Tmx2	938.072493170079	0.4372037839783778	0.43289057604929265	1.0099637371837682	0.3125126639555371	0.6897486994786731
Nr4a1	746.1075082636412	-0.9400849985685933	1.2503686162455934	-0.7518462846511055	0.4521435040723777	0.7823207551911415
Zfp786	195.66224557727767	-0.22392681401982537	0.4339796169375356	-0.5159846344858543	0.6058651410079205	0.8647602110650363
Brd3os	82.69492941018184	-1.3146155627524019	0.546183238512244	-2.4069130468618942	0.016087999838227507	0.2061621703407344
Bbof1	51.00406757995347	0.3054049414823239	0.7356550989564764	0.4151469104415092	0.6780343603331465	0.8971027523238755
Dnase2a	119.41919203504592	1.392223308040068	0.5342614994575847	2.60588365332995	0.009163758322191976	0.16313684725674696
Ldhb	8187.338566161484	-0.19589905859587176	0.33273541974698695	-0.5887532464828482	0.5560268132581366	0.8372082632648469
ENSMOCG00000001381	1143.8726564235033	0.44921464318165005	0.6105196899252963	0.7357905905321683	0.46185814843694434	0.7858604930573665
Chdh	54.224644883892225	2.289063610126094	0.8678296540120154	2.6376877069637463	0.008347341421182469	0.15486206580452716
Appbp2	1772.5949097787561	0.11375632556315056	0.31147672768165957	0.36521613158660643	0.7149500775111086	0.9140239812525183
Carhsp1	266.5826567535595	-0.9130695515628153	0.9980693011516297	-0.9148358240347271	0.36027782494547533	0.7217988719352221
Zbtb45	243.67996330746007	0.16593666955420908	0.4740039626527412	0.350074435297022	0.7262828361231239	0.9179464766552093
Tubb4b	3682.5739365001236	0.02891619926480086	0.4301654153449025	0.06722111595516374	0.9464056750422929	0.9845148703531285
Bmyc	473.25971253262577	-0.6883167479898452	0.44442922466546364	-1.5487657196890319	0.12143804898555177	0.4941578256635336
Mcub	54.69933713130384	0.7214286033328328	0.8284762339584683	0.8707897387542902	0.38386896904997425	0.7379061579577977
Baz1b	4222.949635833392	0.1624480590012108	0.40591803419334177	0.4001991666224802	0.6890098283834766	0.9025386657053271
Wdr35	647.9302796603245	0.7921041281664689	0.3059871110855717	2.5886846192843422	0.009634328697584776	0.16714233397061323
Nudcd1	231.76359802898492	0.1301982737861712	0.4826888010045037	0.2697354351607515	0.787363797301581	0.9386393482107406
ENSMOCG00000001396	701.1476746425727	-0.05080813595831923	0.5694036186069081	-0.08923044093507068	0.9288987734947389	0.9792197431298104
Jarid2	1034.848305852862	0.14721642770212987	0.31397921330414963	0.46887316568795356	0.6391602981262613	0.8815254922829372
Fut9	218.02480729347235	-0.19793956200259577	0.6235112626019427	-0.3174594812876104	0.750894979813836	0.928140848139085
Zbtb16	197.4144220735378	-0.3081334203199628	0.9058534299343663	-0.3401581427387085	0.7337374378941215	0.9221737775983032
Neurod1	75.72791992704161	-0.6790013469530287	1.4109471348926805	-0.48123797849072136	0.6303473715045285	0.8773514679227356
ENSMOCG00000001406	509.4716394490824	-1.2766604876042393	0.7647260336651517	-1.6694351066950166	0.0950311810065714	0.44526273022618
ENSMOCG00000001407	53.74736634994185	0.8757596306909038	0.8084749768349657	1.083224163745111	0.27870893678038167	0.661486507966608
Tbc1d32	117.19446776776036	0.3508550758453505	0.5594422338234788	0.6271515710343314	0.5305598849549062	0.8212592755830967
ENSMOCG00000001409	30.849918292674037	0.5546354132092034	0.9095650504386468	0.6097809199481938	0.5420069423210445	NA
Otub1	2195.345059650657	-1.0672510199826333	0.2871153435195204	-3.717150769095254	2.0148221552299556e-4	0.021203774398225336
ENSMOCG00000001411	85.9238493257203	-0.49909368464616305	0.5989940335395683	-0.833219793020182	0.40472078168100734	0.7530380279423571
ENSMOCG00000001415	711.5625030357031	0.6773148466231179	0.7892948071570832	0.8581265713158565	0.39082257652437974	0.7418455035958378
Spry1	58.69375572523274	0.11623157540811276	0.7343579657831034	0.1582764548406116	0.8742389605825972	0.9649276365897238
Rad21l	351.92166170136886	0.01784619721786258	0.8607362840081662	0.020733641127290117	0.9834581330441079	0.994822770455585
Lrtm2	282.4685815212619	0.2483455164410946	0.4378062285172833	0.567249847682993	0.5705444455339297	0.8450346059533413
ENSMOCG00000001422	61.475667552969156	0.28042753781560104	0.6086193251347262	0.4607601603079636	0.6449706876297432	0.8845170786808065
March1	809.9994799248808	-0.5481445411115793	0.376626367768724	-1.4554067054810669	0.14555670114571115	0.5275096039534705
Chgb	3134.605632188697	0.627754321159646	0.7663671882326333	0.8191299559775636	0.41271227243886144	0.7585565507746641
Spata2l	1453.9451680187776	-0.5559745661328114	0.5187300679107949	-1.071799381848097	0.28381015082556577	0.6649074691918101
Zscan29	153.1355937516536	0.4264834149313974	0.5032473292412695	0.8474628480878246	0.3967371866078219	0.7482213821074248
Ube4b	2669.673432490132	0.19001907053711753	0.36374363762117834	0.522398334661769	0.6013930152730312	0.8625938653512107
ENSMOCG00000001430	67.30445282897095	-0.7393174334388134	0.7894909037900989	-0.9364483237103577	0.3490424073741024	0.7147138198675018
Aqr	814.8364746195858	0.2655019314955932	0.37469749939820457	0.7085767370265653	0.47858717661621103	0.7949430502241582
ENSMOCG00000001432	546.4194657104385	1.00613708814282	0.5355861536387552	1.8785718811196983	0.060302973599904594	0.3673111907877318
5330417C22Rik	475.6969016186411	0.2042874370135175	0.5674347269867346	0.36001927146466894	0.7188327220039686	0.91553590340272
Abraxas2	474.5021615202023	-0.6693072385038481	0.29670759560825666	-2.255780601543936	0.024084374792130808	0.2462604225725625
Wdr54	387.31726163348463	-0.3739882638567534	0.4372376742219808	-0.8553431826802821	0.3923611879774207	0.7435791629366513
Matk	860.632738421739	-0.8779576930937271	0.32008518898070876	-2.7428875915487634	0.006090152941048225	0.1264504783554726
Slc2a12	430.9905319741094	0.6287726880662416	0.6081749053318593	1.0338681891571027	0.3011977881745917	0.6794089713528537
ENSMOCG00000001441	39.38029953533169	0.5106151858904392	0.7971371987555532	0.6405612317272152	0.5218077944137891	0.8179851030385171
Kif1bp	1756.4912599627528	-0.2976822703264275	0.3600168367579544	-0.8268565242868475	0.4083183877638913	0.7560742034436775
Pan3	749.258885626371	0.3220895210976353	0.42616753694724957	0.755781454882386	0.44978023742308304	0.7807322605506052
Prelid3b	680.0436119202684	-0.48906298523082775	0.3650891996904985	-1.3395712216231732	0.18038478516484782	0.5694924545628588
ENSMOCG00000001446	4155.113346415609	-0.21901537825471004	0.26973331893830194	-0.8119700566351131	0.41680881339430076	0.7617474118464768
Gabra5	1520.4074591468573	-0.7214325104316932	0.421140950509942	-1.7130428887481512	0.08670464958633872	0.4275443431780478
Kcnc3	338.9266125658724	0.2281895555964926	0.488461546909766	0.4671597120390037	0.6403856154739116	0.8822651818922796
1700123O20Rik	106.84663275469634	-0.7459090664522305	0.5315240807522273	-1.4033401184695145	0.16051544031864456	0.5446924116393355
Vasp	144.43637249924376	0.1791810252792085	0.543775167817874	0.3295130706285238	0.7417679161579531	0.9252916622638825
Lrch3	529.1666099177403	1.1097703677957524	0.5044005895238985	2.200176587508075	0.027794368720506668	0.26261303724600127
Rab6b	15421.79785304231	-0.4797556029693131	0.49691590908283817	-0.9654663781137577	0.33431126841243575	0.7031580968080016
Rnf220	958.0376095791501	-0.18103524495183937	0.2335174187662996	-0.7752537087308954	0.43818975714317604	0.773942164257634
ENSMOCG00000001459	1097.536883231653	1.8317322893427244	0.7162828875647238	2.5572749553886385	0.010549579431183119	0.17524872924447973
Crmp1	2888.5851414794292	-0.4834498438909858	0.4841866628785481	-0.9984782336151478	0.31804751404133463	0.6943675191869556
Psmc3	1438.3874124858228	-0.6196221230708086	0.2610823669091385	-2.373282157681865	0.017630789739786292	0.21570509422380513
Atp6v1d	3499.0277764532875	-0.9533400556366625	0.34602566370969745	-2.755113726005245	0.005867173788091264	0.12437153420317525
ENSMOCG00000001467	1529.5600603510484	0.06771482312211864	0.41049549392722823	0.1649587489360431	0.8689764507531189	0.9635308114084933
Supt3	107.2357774100122	0.37698680496645315	0.540616553837815	0.6973275277833042	0.48559784445943044	0.7997033896871694
Dlc1	823.9875432535732	-0.18553934202974726	0.4875480898721211	-0.38055598182819733	0.7035327491423057	0.9089582294236697
Uqcrh	1131.4195615068081	-0.5455040192202294	0.36529059559612587	-1.4933426313097637	0.13534752164731223	0.5156742549029385
Hao1	149.09195571259932	-0.45368346405881144	1.0684097618884905	-0.42463433061196815	0.6711032624868467	0.8937021273789004
Tshz1	741.9127644038136	0.36984440087097487	0.47615490029779994	0.7767312709365468	0.4373173333655403	0.7730901930107039
Sh2b2	114.75209134870856	0.44088235508264956	0.4573330401833381	0.9640290911540227	0.3350313410593542	0.7031580968080016
Qser1	482.6513588392502	0.8863895950513742	0.5446601529476411	1.6274177397673222	0.1036484063860309	0.4631538329379071
Igf1r	209.3925932374903	1.0157820842795204	0.49921676930707876	2.0347515282578406	0.04187588053828011	0.3105819717177743
Basp1	9341.496333134139	-1.1544515162071467	0.6495209821217871	-1.7773891036374305	0.07550424232261542	0.40273398459239834
Oscp1	221.3336110926134	-0.05895229148084572	0.4296047755302344	-0.13722447895995704	0.8908533625244692	0.9674028113543044
ENSMOCG00000001485	2906.066451855104	-0.6307737505036579	0.39239027152370826	-1.607516282333586	0.1079411605336378	0.4700186091677749
ENSMOCG00000001486	4285.742357297953	0.10983105981946835	0.4874821488604959	0.22530273175377136	0.8217437746690581	0.949447864049973
Pls1	130.71576845263027	-0.16306429009967846	0.5103350435220892	-0.31952399148270605	0.7493292015409871	0.9277483461452806
Larp1b	63.11258141547444	0.8664447237748458	0.814498155231257	1.0637773925084457	0.28742955508023443	0.6696928426751857
ENSMOCG00000001491	1670.334279724297	-0.26674233198251623	0.2575689028025552	-1.0356154375786317	0.30038158701382106	0.678726550022489
Psph	184.7194815897941	0.4926850100476568	0.634224833813352	0.7768302087531479	0.43725895145878824	0.7730901930107039
Haus2	303.42541290678935	-0.22975407104256698	0.38479057755202556	-0.5970886098724782	0.5504482220664517	0.8331335442044348
Snx1	1212.5391717383861	0.201671151726123	0.3439495085467072	0.5863394094622953	0.5576474526387307	0.8380568061139626
Atp13a1	396.4241171120955	0.532100314245184	0.4555078299512588	1.168147459292019	0.24274728949582589	0.6304419578264708
Tmem121b	56.827925375716156	-0.261689078518434	0.9738497052778855	-0.26871608329312135	0.7881481741923833	0.9387700645160422
Sgta	1688.2082415663099	-0.3168457476429884	0.2509009898227221	-1.2628317961872553	0.2066496351692305	0.60011659619841
Nsdhl	579.6093119350207	-0.3791414759036237	0.42491167135542524	-0.8922830354228697	0.3722412448981344	0.729875166418568
ENSMOCG00000001505	1042.8657966752896	-0.04650541779807608	0.32418363856103627	-0.14345393248253083	0.8859316914219451	0.966551159751389
Cdkl4	185.94941852522783	-0.8087643453376655	0.6001583052214695	-1.3475850259861297	0.17779188938052615	0.5660934456616279
ENSMOCG00000001510	149.3509112399183	-0.31966948188943756	0.49900229590698786	-0.6406172566969968	0.5217713849462633	0.8179851030385171
Rbm3	496.7249609450234	-1.1090656587107968	0.8577264535516907	-1.2930295598536756	0.19600083566948603	0.5891924116055646
H13	752.1423526959417	0.6302370415923287	0.40511546776212853	1.5556973054467147	0.11978008763305929	0.49229449329760905
C2cd4c	130.83649279953556	-1.2218073496624802	0.6957013380918595	-1.7562239466343448	0.07905017736675064	0.41100573191171663
ENSMOCG00000001515	2627.44881181816	0.9284174517073462	0.7704883348013025	1.2049727552939153	0.22821381972499766	0.6176419536116687
Suds3	672.5064176755955	-0.9455642279167735	0.34883447080792757	-2.710638732825841	0.006715374908942329	0.13531638628400194
Cbx1	857.3612309580723	-0.20178649897489007	0.3416698047263758	-0.5905892068410598	0.5547956983618941	0.8358837507816603
Mgrn1	1893.5827162647538	-0.3823258950630403	0.29806927927706073	-1.2826746050124191	0.19960610050080552	0.5916197925511049
Cdkl2	1369.2527684306283	-1.3761364931473663	0.5772243925822143	-2.3840581077858083	0.017122898427634554	0.21322042733134045
Moap1	2624.140314047143	-0.7563169761832146	0.4164188480175025	-1.8162409789660285	0.06933341452402117	0.3873812041593044
Atxn1	440.63690843025546	0.07601326240859878	0.5359948939246871	0.14181713906267068	0.8872244458867924	0.9669941444859074
ENSMOCG00000001528	354.0193275695742	0.11708980524652254	0.5643661309305856	0.20747135384161464	0.8356417622705683	0.9542227613813621
ENSMOCG00000001529	79.25614710954574	-1.4179145820494565	0.8781519899911243	-1.614657369351048	0.10638491429300025	0.4673547841789283
Fbrs	994.1604240673942	0.09094652092019842	0.2950890145804121	0.30820029356062456	0.7579299291007886	0.9303603411366936
Syp	7826.369526268233	0.07158724677709356	0.6956062539056839	0.10291346056069238	0.9180316544450017	0.9751237060323895
ENSMOCG00000001535	5156.298282268184	-0.6736941907778304	0.2344409734236768	-2.873619661868339	0.004057973207383261	0.10320033742608996
ENSMOCG00000001536	2391.904125209875	0.18221502457499317	0.5237187750759498	0.34792532413711597	0.7278962661479247	0.9186745027618319
Spata13	1126.5354365153987	-0.08159616614096248	0.6311861389518347	-0.12927433146181463	0.8971405815101912	0.9701513127473134
ENSMOCG00000001541	75.82757181332266	1.1589949559427113	0.8104412987874966	1.4300788442996264	0.15269439131757423	0.5363378023316174
Mlec	1744.8946011818416	0.7676625095020321	0.45912255777029964	1.672020894007338	0.0945202020385082	0.44526273022618
Ube2a	507.9301271904272	-0.7668923927409913	0.31830377914485525	-2.409309731732686	0.015982727433447967	0.20592263774492225
Phtf2	235.04995487229849	0.1574102892099198	0.5845032760732782	0.2693060854464493	0.7876941496118384	0.9386971467265238
Lrp6	360.87879987450987	0.4927839433194644	0.3944808004965463	1.2491962668377792	0.21159329709160046	0.6021585289317788
Fam76b	295.0142939831956	0.421754623861894	0.7677588094669674	0.5493321843544927	0.5827775042166903	0.8499612352413543
ENSMOCG00000001552	79.89079906242787	-1.2622382369875027	0.5187343240738642	-2.4333038675261607	0.014961738766740671	0.20205431353733713
Dynlrb1	920.0786041719448	-0.8324418107455002	0.588713531956035	-1.4140014889409178	0.15736146530890022	0.5413105630065598
Olig2	554.8318926358197	1.2832087161031702	0.6567485933413167	1.9538811793636806	0.05071527083415148	0.3404501746133935
ENSMOCG00000001558	2043.3051439233413	0.07381465670984087	0.5887498714796937	0.1253752404638729	0.9002264886791123	0.9703078163796749
Pcf11	854.6342167338581	0.3368266377712563	0.44444966084900334	0.7578510401556798	0.44854016300674315	0.7804431467512178
Ccng2	546.8212007551392	0.18038806682231412	0.3637746565523193	0.4958785983937012	0.6199800665674076	0.8725024018099349
Lrrc36	49.422445863598604	-0.14538659317558733	0.8698143702625766	-0.1671466903124382	0.8672546291680393	0.9633192331502504
Ednrb	171.6404405223719	2.585252452509431	0.8539234639850435	3.0274990225057357	0.002465865116064786	0.07778965251535744
Fbxo45	1098.2379336755287	-0.5400162207131374	0.4544354959392415	-1.188323151555349	0.23470611993089524	0.6221857285372729
Atp1a2	6186.370241404392	3.4681164538304725	0.7194864629387736	4.820266443464135	1.4336661291013543e-6	0.0013133556016578936
Enpp2	1377.5341896741986	2.7038413708497013	1.3551800401250325	1.995189783491969	0.046022184892864956	0.32303906988097314
Pcdhga10	59.710184266020576	-0.4052753755183871	1.0315099469978144	-0.3928952664954241	0.6943968378235961	0.9047927348388235
Kat6a	1098.3521725284165	0.5795115835152008	0.3469964750461644	1.6700791656114162	0.0949037016504896	0.44526273022618
Mtch2	788.6907930998866	-0.3263196577523881	0.28659373957142203	-1.1386140473283644	0.2548641668065888	0.6421833867082752
Rimbp3	86.42248472757555	0.1387919515069055	0.5431385687149933	0.25553690991835126	0.798308439617958	0.9437800938400196
Gmppb	105.56722265286813	0.16004493842972542	0.4586733979481812	0.3489300647163465	0.727141813634568	0.918348603201177
Ttc30b	189.4397264155704	0.41709275932806467	0.35494065324361307	1.1751056282690548	0.23995245921620634	0.6278195607066016
Epsti1	33.28843983525853	-0.9540101064666191	0.9870955432726097	-0.966482032026708	0.3338030336379599	NA
Tatdn1	190.62026857268944	-0.028716279852897156	0.5826255970131089	-0.04928770723448158	0.9606900158180699	0.9872237298441326
Akap8	526.1495041176718	0.21266182295094493	0.5234569666408453	0.4062641945825064	0.6845484908244335	0.900514452752673
Zbed4	164.45755483883949	-0.03159128268542894	0.398974394858925	-0.0791812284008838	0.9368884752733441	0.9822130194760651
Plcb4	1145.486339563786	-0.29688500072463747	0.9713961227065085	-0.30562712140280635	0.7598885680649157	0.9308904128387258
ENSMOCG00000001594	583.081170162464	-0.3331461124817289	0.43898357626124235	-0.7589033633537834	0.44791036684998486	0.7798755611390952
Lekr1	80.07715856116575	-0.16964736639004235	0.8169329029159341	-0.20766376991856794	0.8354915083608802	0.95418292532786
Fosb	333.92103250376687	-0.4188858168067919	1.0228497785384987	-0.4095281883966557	0.6821520846980509	0.898753887794064
Alg1	73.31916771699366	-0.16711371938569006	0.6143934354421993	-0.2719978921412349	0.7856236400958873	0.9386393482107406
Ppp2r1b	1169.734326284776	-0.12281882684513255	0.3964957205362293	-0.3097607880332977	0.7567428724874273	0.9303603411366936
Zfp664	870.0950617525062	0.1992018309698441	0.31102505424962545	0.6404687604683023	0.5218678924279541	0.8179851030385171
Trim26	301.0123384005772	0.14062644905435298	0.2891010563660648	0.48642661781314733	0.6266647221306814	0.875916416969683
Zfp397	167.66576194842156	-0.05507089537191781	0.432576536194301	-0.12730902109582184	0.8986958206039979	0.9702488151268944
Smarca2	4441.926398130561	-0.4967012723690115	0.40634903657492855	-1.2223512981737377	0.2215748079795665	0.610370075629605
ENSMOCG00000001614	183.79640948874925	0.7092979211728325	0.881302506128897	0.804829120807121	0.4209182946268522	0.763275443687485
Krtcap2	240.02575719492998	-0.25313434310621735	0.46917471127167426	-0.5395310894317162	0.5895204509745162	0.8550527141101288
Zmpste24	352.95051356165044	0.6077250506899493	0.5013871761343107	1.212087344107008	0.22547894777307337	0.6155123938998311
ENSMOCG00000001623	1906.8854992907084	-0.346080875068266	0.41192091020617216	-0.8401634063564477	0.4008167728875919	0.7509423660952087
Myo10	825.2951220261282	1.4518882882787967	0.5391349558407285	2.692996016210298	0.007081311513821066	0.13965332756610302
ENSMOCG00000001626	50.54253060675063	-0.4873776757807256	0.6990202988390894	-0.6972296463924537	0.485659088489803	0.7997033896871694
Arnt	398.89128525021584	0.0865316560667313	0.38190315794592145	0.2265801009139192	0.8207502670615988	0.949447864049973
Trip13	71.36136573387368	0.03984787418000569	0.6188358770301619	0.06439166774111178	0.9486583644391017	0.9847686895532829
ENSMOCG00000001630	396.34344943627394	0.10783510602717321	0.3995671341648463	0.26987981945152806	0.7872527130430099	0.9386393482107406
Apoe	5381.341928107059	3.0270688811706514	0.890492160846975	3.3993212004151854	6.755333228429495e-4	0.04039512970393937
Ptpn1	296.8541472018918	0.14808296250299005	0.3022282427413084	0.4899706300107146	0.6241546819153866	0.8743225658355906
Ccne2	53.39265609879577	-0.05299830370203582	0.6998392523010157	-0.07572925286454228	0.9396345023922072	0.982445317546693
ENSMOCG00000001639	349.9719112165267	-0.2969850871681201	0.5609458961614004	-0.5294362418914441	0.5965028626475096	0.8601445425735642
Kif26a	206.97744555796174	0.6664048670670326	0.6431131282196516	1.036217172104479	0.30010083726071174	0.6786893405740193
Phtf1	548.1101715734417	0.056049724224885265	0.29411859447496386	0.19056844850268848	0.8488637115732905	0.9596221702767143
Nlrx1	251.69803830732747	1.0050381911420427	0.4450532511317965	2.258242555438415	0.02393054147986666	0.24525674057615557
Dpysl5	1206.8306134546747	0.3053636270238136	0.49711455436343976	0.6142721518480481	0.5390355016467204	0.8267965695963514
Pex6	524.1114293923889	0.2892165073302109	0.544793014013454	0.5308741116182311	0.5955060186652177	0.8595608276607108
Rbm15b	341.5319754244384	-0.1437769027400761	0.42959750782648237	-0.3346781583242998	0.7378678793498569	0.923424828772225
Klc4	727.6767366632919	-0.15217046718888558	0.25527483848832455	-0.5961044499724377	0.5511054515815283	0.8333995411478902
ENSMOCG00000001649	62.16444832589992	-0.5920125700092362	0.6286869046653681	-0.9416651843962733	0.3463640852121391	0.7121303079776552
Cdh12	254.33487507510378	0.13891234865665297	1.1310201608789832	0.1228204000790719	0.9022493196380137	0.9711579128838419
Zmym5	339.3645929651831	0.36199681940655953	0.47873970709809005	0.7561453834711671	0.449562034392319	0.7807322605506052
Gnaz	1320.8769419654302	-0.9499967605012501	0.39158652396260635	-2.4260200552559565	0.015265426667146139	0.20308250436966027
Pcdha3	40.40852065427856	0.12719689230596715	0.7419561353580817	0.17143451781631214	0.8638821152221995	0.962668944873505
Gpatch8	1981.8037649522203	0.7261695178610464	0.4235122256264935	1.7146364943463859	0.0864118934369199	0.4274393488562597
Elovl6	424.88347075308246	-0.08765717774224382	0.46272942173475967	-0.1894350642620033	0.8497518446573764	0.9596221702767143
Pcdhb13	38.173275646676046	0.520989473087569	1.047123429520298	0.4975435162655482	0.6188058238792172	0.872003656543625
Adgrd1	53.71951732121154	-1.0247727687127166	1.2440655963725487	-0.8237288867249066	0.41009362210881695	0.7567153767613136
Notch1	355.11800164456787	2.685254310284251	0.7540732702553122	3.560999197564826	3.694462126641781e-4	0.030172552368365805
ENSMOCG00000001664	32.4567479827039	1.0746394657513454	0.8051706752115448	1.3346728822047602	0.18198343272622905	NA
Lrig2	331.47102124129236	0.44681851260827243	0.4031959020653571	1.108192097983784	0.26777886276584	0.654475422792399
Sema5b	271.59746257282137	0.5627118946950491	0.582582278055305	0.9658925715581592	0.33409793984211306	0.7031580968080016
Grk5	442.2219806150841	-0.6513248452710892	0.3658748754142142	-1.780184672516011	0.07504574298147292	0.40254577155420657
Plbd2	317.99329495531236	0.6636051434904613	0.4062270550680242	1.6335818484057842	0.1023466817533175	0.46085071541478667
Abcc1	663.4958260864582	0.19177248820144432	0.7034470618191867	0.2726182233322588	0.7851467021891578	0.9386393482107406
Ddx50	1258.914105350003	-0.2222432084860601	0.24073054359364743	-0.9232032012572784	0.35590132089997845	0.7194127888709388
Mid1	88.74851698952418	1.6624828189913217	0.6746192723430475	2.4643274912934006	0.013727062423710776	0.1952658209841729
Ptprm	349.3471846833505	0.32028435335791616	0.5861666814079858	0.5464049109522667	0.5847876350980541	0.8516898411602436
N6amt1	89.08867146479008	-0.39939904312772423	0.564070515883305	-0.7080658036208224	0.4789043943486455	0.7950108637047115
Rnpepl1	282.8429312854596	0.8707730608933989	0.47847808141667936	1.8198807734624152	0.06877716345956675	0.3859830240024388
Lsm8	65.11747697867852	0.2398139184823197	0.6955651559964576	0.3447756352009401	0.7302630515256954	0.9198483432627443
Gpr153	185.53151975360197	0.3908018882376836	0.7199374180482349	0.5428275825656562	0.587248520255374	0.8530086763460765
Cdk5r1	835.5902222932842	-0.566868415923932	0.6095383849959186	-0.9299962559826772	0.3523730230003936	0.71755512085364
Fam98a	424.6012997104387	0.11192437170686578	0.46665611408131596	0.23984336287376423	0.8104516891917485	0.9460042685383072
H2-Ke6	151.40303326270646	1.2333874087673624	0.7043434823899115	1.7511163794436617	0.07992586536817407	0.4120099693814822
Copa	2152.1599534286433	0.06325192209343387	0.42136072369337685	0.15011347412499257	0.8806750896278176	0.9657795581062245
Rfc3	111.98520378028617	-0.3221058859819835	0.5152940874056537	-0.6250913679287238	0.531911093033683	0.8222375245045429
Zbtb39	159.56722194842624	0.4848393840664178	0.5382451562037194	0.900777979101612	0.36770637811774415	0.7261315590461995
Fam222a	276.1325236762551	1.0928730875833428	0.7611311904908022	1.4358537677041228	0.15104395632162257	0.5350654538506808
Prpf6	896.4108041890156	0.3208112354441406	0.2812083491339708	1.1408311183936524	0.25394020827679836	0.6412947455569518
Lrrn1	506.2370588207483	0.6938556525267292	0.6889415115146446	1.0071328856368096	0.3138709197482055	0.6907227671303833
Htr1f	100.64674298334538	-0.6076419841175991	0.7395640963578971	-0.8216218000711909	0.4112921780955554	0.7576032499864227
Tmem39b	131.45292477914592	0.5197246549762312	0.5548635699300474	0.9366710722092528	0.3489277807681989	0.7146829433164694
Ppp1r18	72.75947175124287	0.606813253145593	0.6121270452955866	0.9913191351520375	0.3215297722351184	0.6955852376605473
Zfpm1	73.71458441562845	-0.17722641958210134	0.5907452708895792	-0.30000480463470036	0.7641734907664711	0.9319609426925315
Mrps5	301.1011910992159	-0.4195623871884184	0.6431887940151553	-0.6523160712568825	0.5141972944993507	0.8142255960301303
Kif7	76.98878842811895	1.0828915762428475	0.8004906156998602	1.3527848484470828	0.17612437457928873	0.564851958602185
Sf3b5	324.7434357761204	-0.10135956651071172	0.3844993114979799	-0.26361442915417094	0.7920770388621032	0.9397765285990354
Usp12	1546.4614035987331	-0.4371265647551609	0.24443442158999126	-1.7883183633129505	0.07372465883855511	0.3995398186916479
ENSMOCG00000001716	169.73351128102513	-0.8324792322458338	0.6150069369217327	-1.3536094997767107	0.1758609945306006	0.564851958602185
Kcnh1	289.6432335889715	-0.31316524651870237	0.849455500261528	-0.3686658646889518	0.7123767952289958	0.9128205130301338
Plekhg5	471.87738570922056	-0.6179257672003623	0.7671764989852214	-0.8054545049512338	0.420557449785458	0.763275443687485
Ube2g2	780.2373467170579	-0.38907506266242464	0.252966159627055	-1.5380518217774006	0.12403594452610431	0.4996732562006885
Tmem259	571.2006716327	0.20953640500372	0.4092276913494671	0.5120289008614101	0.6086307829245367	0.8662881233439365
Ttc17	547.2624456666017	0.3666951315643748	0.3067894631307583	1.1952663817794935	0.2319829701303868	0.6200940020515062
Nfasc	2220.6558959522035	0.3850955598274468	0.45880796935610035	0.8393392999862167	0.40127893562896094	0.7510789979768837
Ankrd13d	621.0930989455247	-0.34314699593366593	0.29482522198094274	-1.1638997288903818	0.2444646494888002	0.6321316833487306
Grin1	4672.425909452827	0.1598097739181599	0.40062588873768745	0.3989002668342196	0.6899666925729533	0.9027190191326385
Igf2bp3	357.33614719026724	-0.2502432463729228	0.40381013354560535	-0.6197052168445915	0.5354518804447506	0.8251384945249415
Erich1	150.51648808922988	-0.49355487663104913	0.4227042118059165	-1.1676128669795784	0.24296295767900403	0.6304419578264708
Relt	71.91176947283027	0.3524322348857846	0.7688034712883982	0.45841654993461667	0.6466532037669215	0.8852307930466479
2310011J03Rik	192.2232328928741	-0.5604729841107833	0.4146986301225606	-1.3515187738747543	0.176529310140905	0.5650249472291453
Map3k20	1268.563467274828	0.9288957166003718	0.37511168285753776	2.4763177449558498	0.013274538017828894	0.19234575948890836
Ikbkb	337.2684477998834	0.03828450449984559	0.46063076870839725	0.08311321583487541	0.9337615174889571	0.9811117480503927
Zfp11	150.69706791356936	0.7106117662674144	0.52017176262825	1.3661098454805316	0.17190448853295723	0.5599813493892559
Msantd2	331.3662867514107	0.6335899173535936	0.7676891897679341	0.8253208795933709	0.40918944084003234	0.7564248143120884
ENSMOCG00000001762	195.28996201110456	-0.19387107270793488	0.5178519116912845	-0.374375508385707	0.7081249617866942	0.9117788611809676
Tmem150c	713.7217324290184	0.26641154167077685	0.4336305189227704	0.6143745194240463	0.5389678695895899	0.8267965695963514
Flcn	519.0634075635859	0.15566910243201593	0.33680195501845617	0.46219773998486896	0.6439395238079433	0.8841918399683724
Rcor2	425.3598126102462	-0.5842608991450834	0.38401871743712984	-1.5214385982129541	0.1281498089386577	0.5037207381397758
Rdh13	111.19498685923722	0.6355271882974689	0.6485663141706475	0.9798954623632399	0.3271377230603485	0.6993003617977555
Rad54l	37.841999911164194	-0.790032787589454	0.8551896343801682	-0.9238100601652649	0.35558521644297014	0.7191529581530274
Cox15	661.262166059979	-0.8759260415020277	0.4205798782481054	-2.0826627397169672	0.03728197603178054	0.29855707674743037
ENSMOCG00000001781	1342.9683730043887	0.46413868156778787	0.2935392193540419	1.5811811538818037	0.11383662320530667	0.48175983030516256
Grem2	175.05217143436698	-0.1153222018381625	0.900292389464272	-0.12809416494877418	0.89807445370518	0.9701826928193984
Vps26c	445.3302926162256	-0.20033528168128958	0.3453162028094214	-0.5801502508466242	0.5618132990682612	0.84085030978194
Olig1	172.25259723538636	1.6117618810083967	0.7888479531847752	2.043184462229145	0.04103418126746684	0.30804516429140455
ENSMOCG00000001794	572.5182519278799	-0.30908307714123506	0.5150311947527386	-0.6001249638667475	0.5484229565527152	0.8313462020751049
Tef	6700.03581473688	-0.36824892152569966	0.5032407077935117	-0.7317550345644902	0.4643180987269965	0.7872356472856348
ENSMOCG00000001801	244.22178789170627	-0.17098526531246833	0.7195385905938977	-0.2376318206523702	0.8121666680383703	0.9465849347815952
Pmm2	310.66240624378526	-0.5122304821878656	0.42533752362785404	-1.2042917770782855	0.228476823799522	0.6179318600463761
Cacna2d2	848.8249399807451	2.0085194525499745	0.6532210625972862	3.0747928497036785	0.002106488054228462	0.07260972736488369
2810459M11Rik	60.50557588330874	1.0183603224074047	0.7948807213293116	1.2811485988795388	0.2001414764789356	0.5920603080317169
Senp2	1434.3517001439116	-0.5563970848088967	0.3014157088395724	-1.8459458763811059	0.06490006452523153	0.37579324430155886
Dennd1b	85.77290275434201	1.2684048108780308	0.6147929165827479	2.063141550049577	0.0390991815089052	0.30350356821403435
Ccn2	162.5335815275308	-0.25598785668802504	0.7839059623689444	-0.3265542921939719	0.744005019248869	0.926752664596999
Cmtm6	123.64202675470207	1.1397142519093966	0.570645529285259	1.9972368018670077	0.0457994649822629	0.322467280976359
ENSMOCG00000001816	1644.9592799434536	0.1769265473848188	0.36214732719869575	0.48854853839014056	0.6251613539478685	0.8745346219442481
Timm9	644.5177260044624	-0.8421638445668569	0.3856271360209955	-2.183881179256548	0.028970980339487504	0.2700713286011789
Ncapd3	519.8400072640869	-0.12860221667889335	0.4034665999882132	-0.31874315416108867	0.7499212878041355	0.9279936363678291
Sigmar1	243.0862235667832	-0.03727326839863749	0.46914694551040587	-0.0794490271232316	0.9366754738470366	0.9820970494612027
ENSMOCG00000001823	819.1496941189656	-0.52924788294461	0.42211348044943975	-1.2538047408035875	0.20991298563313174	0.6018431623603168
Setd4	63.79798296247257	0.3903926795454055	1.1222493094749433	0.34786626843910023	0.7279406188635	0.9186745027618319
Tmem222	156.8352859329109	-0.37659876749470306	0.47604669911476466	-0.7910962689059906	0.4288878162836384	0.7685022578857138
Fam161b	107.66366909999152	0.8531682338490563	0.6841027537567929	1.2471346287729874	0.2123481375220359	0.6029239393515465
ENSMOCG00000001829	132.52577218804117	0.9370467801823048	0.7645065491546342	1.2256883622755879	0.22031597131152172	0.6096674487600434
Zswim5	654.5250542963612	0.6126003939224185	0.37458934415234296	1.63539193916119	0.10196691113415121	0.4600269109053864
Cpt1c	391.77636547123126	0.16897135598106328	0.39752058790366507	0.42506315678425116	0.6707906350895136	0.8937021273789004
Shisal1	105.570031250995	0.5377720382310355	0.7612092450669944	0.7064707131660046	0.47989545935093597	0.7956525359827938
Cwc27	239.56567255610477	-0.8937608514324159	0.5217657545043077	-1.7129542207719517	0.08672096198402336	0.4275443431780478
ENSMOCG00000001834	2569.811290340013	-0.5625583116154127	0.41454721532168204	-1.3570427947004213	0.1747676132412887	0.5632444934447319
Rbm4b	206.75982103060653	0.5521594337727128	0.46568975470211826	1.185680870574242	0.23574835178915451	0.6231427871697323
Zfp580	78.83123954000163	-0.6113894056745852	0.5990544889669928	-1.0205906423117916	0.3074484247960946	0.6839486826287627
Ppp1r1c	71.90257629340798	2.1048520094172773	0.9094878404973059	2.314326718503844	0.020649807260999502	0.22864758654358108
Abcc12	293.40306334038536	0.20374738626130134	1.4153554423305676	0.14395492479670313	0.885536063603976	0.966551159751389
ENSMOCG00000001841	1489.8509022446733	-0.38257407467282945	0.5180150901050131	-0.7385384749993928	0.46018729579445267	0.7858604930573665
Caprin2	174.41065239578566	-0.20496150146734024	0.6702460017648879	-0.30580040899555805	0.7597566170449029	0.9308904128387258
Hook3	572.7436309995688	-0.15140736502422578	0.5000007674235847	-0.3028142652748336	0.7620314114159865	0.9315458002219277
Mnt	370.95475235400625	-0.21693737959100853	0.46148901288242766	-0.47008135304464355	0.6382968959406883	0.8813950716468744
Pdia3	1770.376424663976	1.1005161932924747	0.5735057984285513	1.9189277533164812	0.05499347771936445	0.3518462515709376
Sstr3	151.5310129956163	-0.5142312217705364	0.7068522853144962	-0.7274946017069778	0.4669230210879794	0.787997365064682
Spns1	168.70267979359733	-0.34422182286346753	0.6753696653753851	-0.5096791290916828	0.6102762771320569	0.8665206885873343
Prxl2c	127.42073113371069	0.4747747627284253	0.4724332820152589	1.0049562145646858	0.31491793396450124	0.6911234828800737
Clcn2	258.0116279189038	-0.2286589634646624	0.6552004516697146	-0.3489908513981443	0.7270961778269944	0.918348603201177
ENSMOCG00000001860	323.0716353242116	-0.46902323948575864	0.3602836538880501	-1.3018165948530567	0.19297908950510934	0.5859002970051215
ENSMOCG00000001861	454.18566363120135	0.36356301603332586	0.4482543266544569	0.8110641535727628	0.417328830098678	0.7621250459826886
Ap3d1	4720.548550642583	-0.18190185207645887	0.30636230635918105	-0.5937474953697339	0.5526810110140699	0.8343806289146628
Cct2	1761.334971105321	0.29675700513028497	0.28415365915837015	1.0443539809033058	0.2963216465181394	0.6762324086228026
Wdfy3	2686.8005255226594	0.7905208054235027	0.4903324217124287	1.6122140213830878	0.1069153751500988	0.46864638455030405
Filip1	605.5040765140296	-0.13804032556843684	0.7340847836460724	-0.1880441178508215	0.8508420669785316	0.9596221702767143
Emp2	36.41799910514837	1.4832036283290013	0.7872437944940227	1.884046135012453	0.05955873528725435	NA
Colgalt1	217.82114700778564	0.20482633412794357	0.45276855660039267	0.4523863928756	0.6509906478472756	0.8877320915514891
Rasd1	601.3061165223583	1.3949445790646404	0.8586368112905565	1.6246037448219783	0.10424701869859311	0.4638307211686085
Proser1	469.6817143061115	0.5391542075838567	0.37449627872690555	1.4396784112694077	0.14995840399838697	0.5350348628360962
Zbtb41	255.33913499805465	0.8106906259503306	0.4011533950378957	2.0208993267369637	0.04329018762646456	0.31533172085180855
Hmg20b	78.09388378698014	0.9196743420742702	0.5837791147022128	1.575380685798255	0.11516859983264566	0.4849805202584356
Phyh	876.394190720503	-0.18986533011303708	0.40324576090807746	-0.47084271806224426	0.6377530563881557	0.8812705966826695
Celf3	2437.143345749683	-0.6929024969371316	0.3689206835348873	-1.8781882606796338	0.0603554155289463	0.3673111907877318
Rras2	213.18489511861654	0.016075113661523758	0.503738270186888	0.03191163866815173	0.974542517052752	0.9921461872092566
ENSMOCG00000001884	40.29029562194597	-0.061348734949226	0.8345208297962273	-0.0735137251927026	0.9413973225029832	0.9827292346895241
Sh3tc2	129.9998098452765	2.3731882023464603	0.818053712310432	2.9010175818942945	0.003719530081542933	0.0993992173701316
ENSMOCG00000001887	114.3921766176515	-0.4615191753280649	0.4366664661249597	-1.056914627366859	0.29055055208422126	0.6717656247338635
Ssr2	311.3736296554581	0.8744574921199942	0.5547747974688364	1.5762386757828801	0.1149708084120125	0.4848503407832178
ENSMOCG00000001891	124.0202563249237	-0.6997620561374617	0.538538371698151	-1.2993726963798895	0.19381605712306968	0.5873966863515281
ENSMOCG00000001895	1105.7362762480298	0.11515673833370244	0.37146006922889935	0.3100110829483023	0.756552528312374	0.9302991072992194
ENSMOCG00000001900	30.03610113830174	-0.06646364296919262	0.8135890626451364	-0.08169190813984935	0.9348917132216179	NA
Ckmt1	1963.2511971814051	-0.028578055677740074	0.5793576588175815	-0.04932713884557148	0.9606585921665386	0.9872237298441326
Cldn10	204.27330502248154	2.134613475933332	0.6292914459524876	3.392090405269069	6.936155029139375e-4	0.04083403742897299
Cep95	189.09172707428502	0.3131254171210529	0.5965822705721904	0.5248654419795781	0.5996767344731166	0.8618883677214217
Tssc4	192.81727270286433	0.05822324548416135	0.4876139525622385	0.11940438779124106	0.9049549852122403	0.9712747909877221
Scrn1	5934.654369812406	0.05660426707556303	0.3289017805663431	0.1721008228599277	0.86335826586735	0.9624162446282832
ENSMOCG00000001913	170.95648951002383	0.3109346036678195	0.6151741689122073	0.5054415796060409	0.6132487210603379	0.8684951519411145
Grik5	2316.845404304972	0.3972490984698198	0.4961963722137256	0.8005884781009918	0.4233699231618361	0.764588229479165
Srgap3	4305.501713568057	0.31794961020305235	0.24628120555512686	1.2910023299844675	0.1967028695773633	0.5891987994889344
Cog8	438.02893088348213	-0.10902785088845778	0.37464946103958735	-0.2910129660561218	0.7710414029959972	0.9341748967931741
ENSMOCG00000001921	205.57892923409466	-0.3006223903497693	0.6204402012006696	-0.48453080533467674	0.6280092073972675	0.8763536135142344
Prkcg	3859.740687255944	-1.101513835958428	0.5792517345380495	-1.901615084220473	0.057221494458886926	0.36023187512180166
Bmi1	844.3594395081175	-0.3332734959751521	0.5731636690941949	-0.5814630513860801	0.5609284134714831	0.8402268160981078
Cdkl1	879.0546009638341	-0.9396385870189696	0.46560149810694657	-2.018117619550998	0.04357901307380579	0.3158186142385808
Snx12	1388.7062712335426	-0.3883854699695097	0.2511113897472652	-1.5466660845627354	0.12194378534566504	0.49506792681290784
Ppp2r3c	669.0606091574833	-0.6926853636253747	0.3360599287115108	-2.061195948833303	0.03928434987564511	0.3037407130809684
Tomm22	1033.9404782729368	-0.3862479291868888	0.2575203738383491	-1.499873285479714	0.13364722917724517	0.5129900007689376
Rbm25	2935.9943160567136	-0.39973664666604053	0.6107356510749047	-0.6545166406488593	0.512779009767677	0.8138543676849934
Acss2	773.6220860397184	-0.10714194893814127	0.3834343204596709	-0.27942712277215237	0.7799170587353434	0.9379265808764083
ENSMOCG00000001937	126.5686218993874	-0.3500021945389956	0.6005314778962805	-0.5828207303388774	0.5600139880856171	0.8397032336797576
ENSMOCG00000001939	451.0006896049378	1.3382183351490198	0.75951502047385	1.7619379460252484	0.07807978248343024	0.4086424960259285
ENSMOCG00000001940	902.3569514663483	-0.4592093045684909	0.5852824235660493	-0.784594387390943	0.4326914218402655	0.7704621729095731
Dennd4c	498.43505255195345	1.3767499978492932	0.7869710598337654	1.7494290045940304	0.08021689087066405	0.41278202779486667
Rin1	558.8899743548097	-0.19178001965495256	0.6022451305223633	-0.3184417937735923	0.7501498400681977	0.9279936363678291
Ddit4	718.6681524624142	0.692858688119191	0.5740859935558257	1.206890075522833	0.2274744802371617	0.6172734061280337
Cldn11	1011.5343258652517	2.2836885887492557	0.9089514675442556	2.512442820428216	0.011989853346314123	0.184120497224055
Slc9a2	111.07501308742292	-0.34945139989559787	0.7875775416316316	-0.44370411981483904	0.6572565164902304	0.8892030141185234
Slc9a1	527.6163999615377	0.6378404979623934	0.498369419047984	1.2798548096727838	0.20059620334572653	0.5924770522602201
Ngrn	1057.29038942167	-0.6523500488244901	0.3100202701509394	-2.1042174065162924	0.03535948683174439	0.29385420365038273
Pigm	50.14986134018562	0.5648346622730392	0.6759787910188187	0.835580449827034	0.4033909708712548	0.752905115047232
Mtmr10	360.8304528229987	1.3211801578285194	0.47632108990185296	2.7737175318034972	0.005541977489982879	0.12204665983495629
ENSMOCG00000001957	96.28084700818225	-0.7784409638944385	0.7290229613469106	-1.0677866201309014	0.28561677484963355	0.6667755568338913
Prpsap2	1054.277415117692	0.3102029114024268	0.35229219308584114	0.8805273505644825	0.37857369530722496	0.7338220675784057
Abcc4	63.87254065756749	0.7106387178623405	0.6425799627239923	1.1059148418662743	0.2687633801378498	0.6550523026191013
Incenp	231.46403724697768	-0.04128481737380243	0.6173091364507192	-0.06687867542536893	0.9466782895684334	0.9845984099656996
Nifk	380.2534793782298	-1.0286208594718083	0.48347667544892553	-2.1275501212477246	0.03337440149218168	0.28822685733117254
Rasl10b	2011.0171605923783	0.5605462767471632	0.6027220474762067	0.930024509795772	0.35235839441648775	0.71755512085364
Hecw1	1271.1717501406383	-0.21638652131750102	0.7800797768045435	-0.27739024616673114	0.7814804703234246	0.9383855531369372
Champ1	254.33706588557254	0.4837254844962558	0.44686362068299923	1.0824901874019546	0.2790347732465377	0.6616395956758133
Srrt	1711.5552302884194	-0.4585101195280546	0.21457214118592027	-2.1368576414156646	0.03260957215162458	0.28420342060728776
ENSMOCG00000001972	458.5435209010234	0.7500521594364918	0.5834569131072208	1.2855313607341836	0.1986066650907245	0.5907529918106292
Edil3	1219.2949755409725	0.622361194922916	0.5109670771252823	1.2180064485256872	0.2232215222397393	0.6125595655554068
Emc9	335.242088848357	-0.1504086609478999	0.379350132297316	-0.39649033476550094	0.6917433366367283	0.9037806810903067
ENSMOCG00000001976	125.18175312154898	-0.4104280855775713	0.4719634978344096	-0.8696182807797813	0.3845090441467873	0.7383442332340431
Ecsit	822.1713160587514	-0.35920757275066145	0.25376563594678697	-1.4155091228584826	0.15691927550376586	0.5405805400610613
Ppl	175.1004122247841	0.22280780676946907	0.8897354553641003	0.2504202855199144	0.8022623436973689	0.9438207509304681
Abtb1	285.8878611940487	-0.005535418823497736	0.38898576342229935	-0.014230389243033176	0.9886461753291721	0.9962698345067804
Cdc25a	106.56825609831033	0.16829620231784304	0.5663131208548797	0.29717870930447626	0.7663300755303075	0.9326780532398338
Prkcq	151.21263034206476	2.219296992581566	0.8114480140063937	2.73498357784394	0.0062383388276928764	0.12879570371340918
ENSMOCG00000001987	41.50750098862678	-0.33091673278846867	0.6989898266856237	-0.47342138634200914	0.6359125749478591	0.8804601631482059
Rims2	1858.1982899130087	-0.8540098942218843	0.3815989555271385	-2.2379775464588474	0.025222519401220035	0.2507911377251745
Ptprd	2665.585139561332	0.6681098203415162	0.6157974145691344	1.0849506745801851	0.27794350224284736	0.661486507966608
Cdk7	369.6699483696934	-0.4691944265004972	0.338759707026639	-1.3850361089832954	0.16604142639579222	0.5517084779823306
Srsf1	2489.386217814389	0.019860586021042993	0.44896631340458193	0.04423624986569049	0.964716087108934	0.9882335866913122
Lhfpl2	263.5516114518324	1.219240085921015	0.6217171816347659	1.961084753545174	0.04986913696580108	0.33692428461957097
Mta2	699.931481552238	0.7840970410411355	0.27047313263126826	2.898983101992916	0.0037437507036182822	0.09978218103326775
ENSMOCG00000002001	231.686015344775	0.04574008687775875	0.4848633688818956	0.09433603322774473	0.9248422271563537	0.9777753192758992
Kcnf1	281.5061178733117	-0.4860197834225883	0.8210602792028592	-0.5919416585277383	0.5538896565269338	0.8353653513529862
Pa2g4	1196.9120204821581	-0.3342041496163349	0.2978855794001098	-1.1219212097791522	0.26189594172204633	0.6480192253883302
Uba6	396.1614576860257	0.9532428781576867	0.521002286360825	1.8296328118174694	0.06730486386552115	0.38333661181811746
Ttc5	362.6438500560474	-0.3725710499836555	0.32971889361761875	-1.1299657289755836	0.25849066557903133	0.644444275429299
Rrp36	181.29069899512862	-0.7029417488258795	0.4170174671464517	-1.685641020353266	0.09186496325268655	0.43823141955021494
Spint2	277.36716851603944	1.498231407332976	0.6764549009185619	2.2148282247619453	0.02677185713406143	0.25901123633932405
Efs	142.8716328663081	1.6321647703391584	0.6716244923465631	2.4301745825805137	0.01509155146492383	0.20301892536297986
Usp37	354.18782514212296	0.24682417334546403	0.39336573570301797	0.6274673946990913	0.5303529024885447	0.8212592755830967
Tnik	3567.6898686887853	-0.20442475515022182	0.3170530347538414	-0.6447651740944108	0.519079373661483	0.8164960392013306
ENSMOCG00000002022	160.88322612692903	-0.24011625007646348	0.5235886011167998	-0.45859716877774315	0.6465234701369671	0.8852307930466479
Chst12	133.6390336514274	-7.371417225097943e-4	0.6232418016068001	-0.001182753981856392	0.9990562990786737	0.9995541808745033
Rsph9	100.63502453764512	-0.18131081401103977	0.7137834063250853	-0.25401377000975506	0.7994849199992378	0.9438207509304681
Stx4a	746.741664802969	-0.39712672595282617	0.3788741928212698	-1.0481757097141922	0.29455765961992864	0.6753835304148917
Atp7a	181.80792973519098	1.2825894113639027	0.4594618380215255	2.791503679362842	0.0052463761155436784	0.11771680144536872
Kbtbd2	1169.833597745031	-0.23480826260957094	0.2661951113168624	-0.8820908146959525	0.3777276989865548	0.733606226698996
Pbx2	939.1188049093245	-0.6373891021082572	0.26723314406014304	-2.385142398222907	0.017072511550310292	0.21281583580323898
Osbpl11	182.1608936475079	-0.048082980136445894	0.3990929437866214	-0.12048065716279335	0.9041024013724346	0.9711579128838419
Klhdc3	3379.4357813684687	-0.6140451796925849	0.2695572283888066	-2.277977049114381	0.02272794505072934	0.24040248025008845
ENSMOCG00000002036	775.2547669354287	-0.6316975223834612	0.24298082207310248	-2.599783460249429	0.009328260209177229	0.1650768904874042
Tctn2	376.27863837967647	0.48938325874101674	0.34896286171176627	1.402393527897057	0.1607977649770717	0.5446924116393355
Bms1	747.1485090484957	-0.16457552722182292	0.387227740365821	-0.42500965211414204	0.670829638520511	0.8937021273789004
Zfp810	99.6527818726136	-0.5329981193654464	0.49622050651388866	-1.0741154635263515	0.2827709347122579	0.6642610189447908
Kctd5	332.1299841142793	0.23426981472657785	0.30842735064730525	0.759562387171271	0.44751620916853474	0.7795393897667764
ENSMOCG00000002043	232.64588307578308	2.038724448297297	0.6227906083171666	3.2735311372246034	0.0010621268781197918	0.05155433810041046
ENSMOCG00000002044	4848.981709027069	-0.5533717527781402	0.30632415443339733	-1.8064907542198319	0.07084171705540313	0.39257463967754436
Elavl3	1932.4279726324569	-0.09212908405983392	0.23638956487393356	-0.3897341412213619	0.6967331478188705	0.9057226272258426
Plcb1	2436.3970352976303	-0.5088560319659058	0.7094339627152273	-0.7172704701341805	0.4732072243583504	0.7921289613286027
Kcns1	176.34632703977806	-0.7068277917952368	0.7417606837472495	-0.952905441448396	0.340637982819734	0.7086189847371465
Flot2	956.7098452516691	-0.2539011220486118	0.3080697490871453	-0.8241676529453383	0.4098443039036904	0.7567153767613136
Zc3h6	1047.8445815325713	-0.24169679208589395	0.3255153372239455	-0.7425050817793365	0.45778137399917335	0.7855576947427864
Tmem69	275.5587197877129	-0.6803185071915658	0.32784841610766613	-2.0751007897751985	0.03797719456375485	0.300282312435192
Tubgcp3	618.8258899061352	-0.3151738042275772	0.2606808401189276	-1.2090409256153571	0.22664712277154234	0.6166295090366465
Pdia4	689.3975059067013	1.1762107104699266	0.45091692897564356	2.608486474752559	0.00909436056131674	0.16238759128405209
Lhfpl4	452.5351418237321	0.05087426136528834	0.6774487668282388	0.07509683957869992	0.9401376623769944	0.982445317546693
Hist3h2ba	97.1320320319533	-0.49075543503707675	0.6696750723519221	-0.7328261948194168	0.4636644425150925	0.7869944950550293
Cpped1	379.2543638236633	-0.03359127293478059	0.4647570000086013	-0.07227706722902272	0.942381414655925	0.9832251081846165
Tbl1x	2080.7792936200244	0.39026693368483906	0.27703620210585095	1.408721786966039	0.15891745004327046	0.5430592861823483
[truncated: 10,940 more rows]

## Sheet: Res_CombinedPairBond
genes	baseMean	log2FoldChange	lfcSE	stat	pvalue	padj
[truncated: 12,128 more rows]

[truncated: 18 more sheets: Res_STsep, Res_LTsep, Res_TRAP_IvP, DESeq_ST_RP, DESeq_LT_RP, DESeq_CombinedPairBond, DESeq_STsep, DESeq_LTsep, DESEq_TRAP_IvP, RRHO_Paired, RRHO_Short_term, RRHO_Long_term, RRHO_FET_UU, RRHO_FET_DD, GO analysis, DESeq_Descriptions, Results_Descriptions, RRHO_Descriptions]
