# Supplementary figures and images for: Prolonged partner separation erodes nucleus accumbens transcriptional signatures of pair bonding in male prairie voles
Source: eLife journal article supplement (doi:10.7554/elife.80517), 2023-02-28

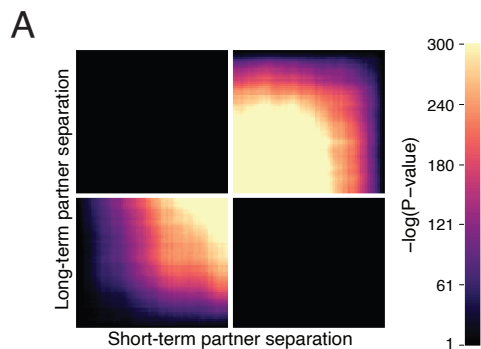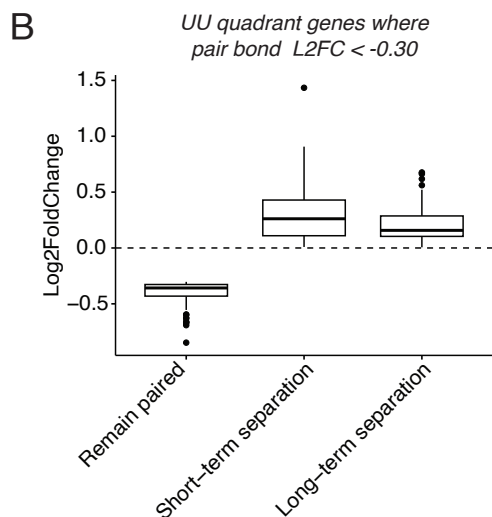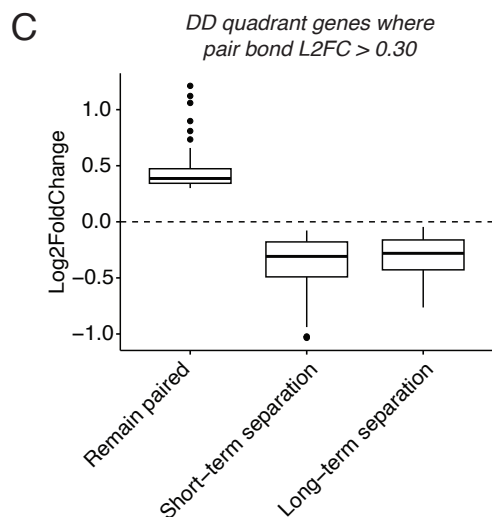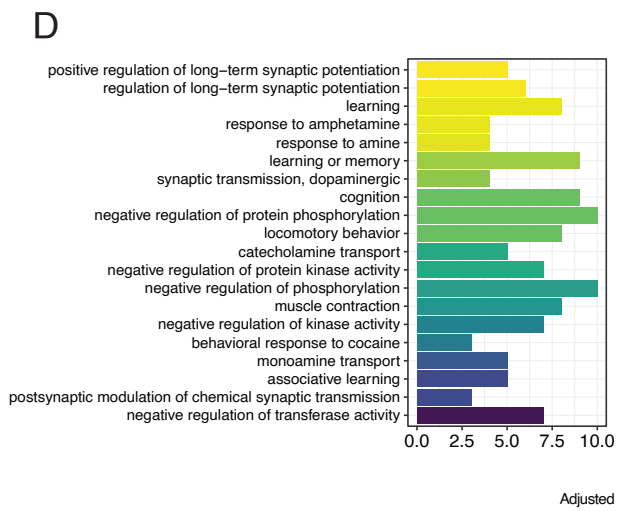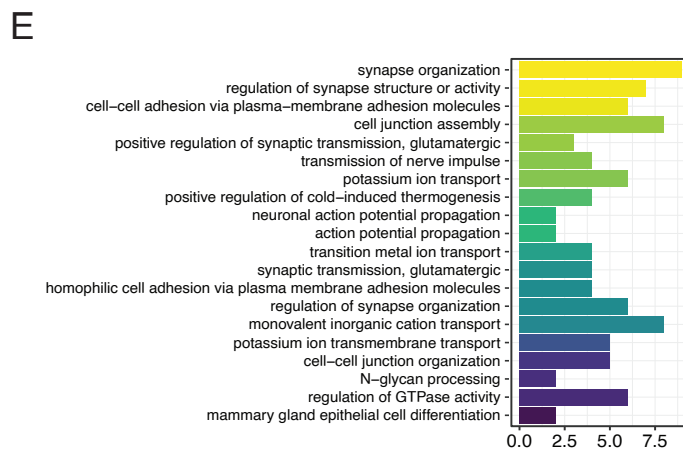

Supplement: supp [file elife-80517-supp-v1.zip]

Timepoint    ■ Remain Paired    ■ 48 hours post-separation    ■ 4 weeks post-separation

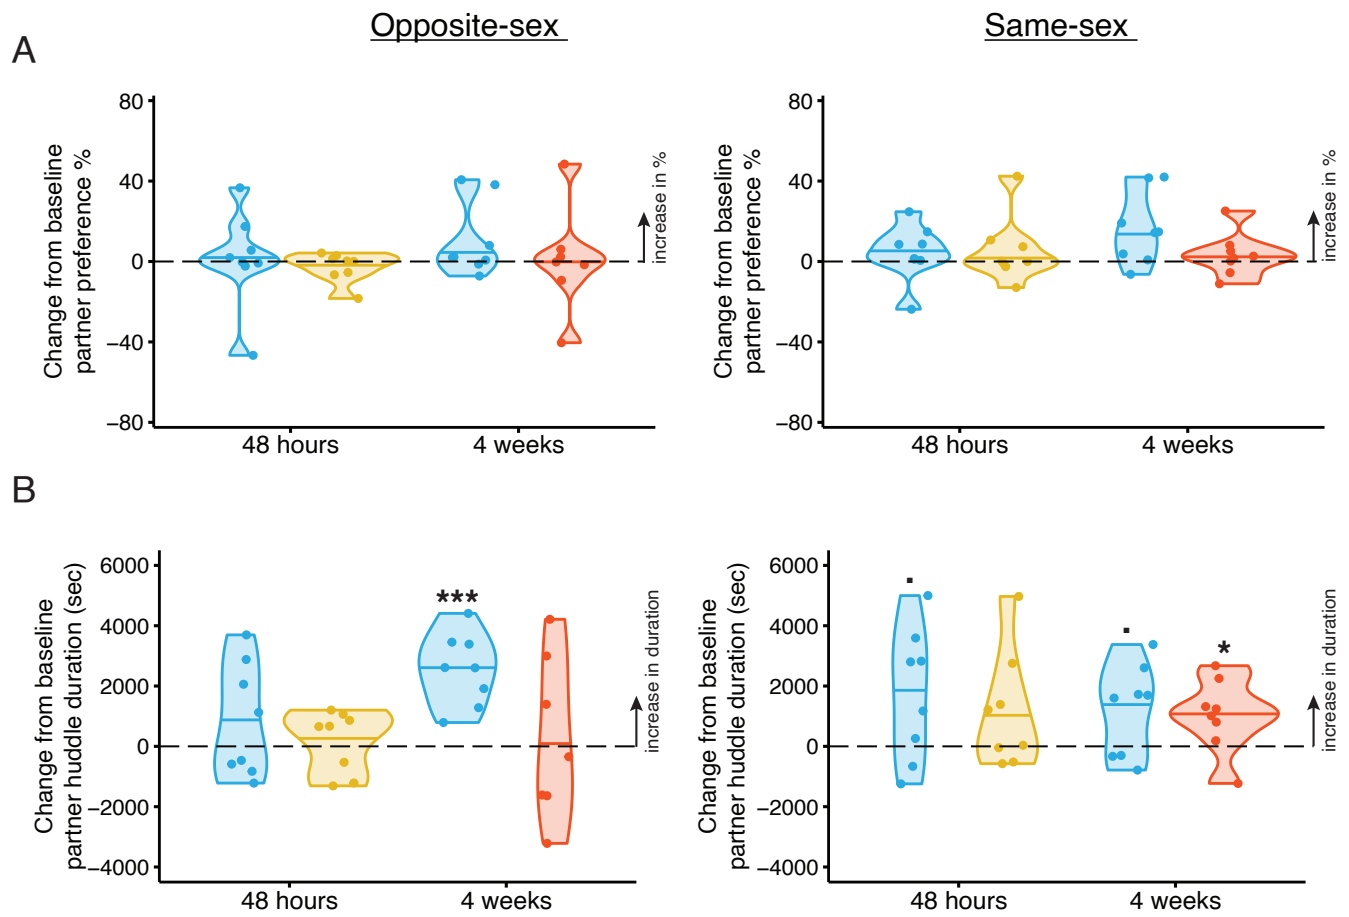

Supplement: supp [file elife-80517-supp-v1.zip]

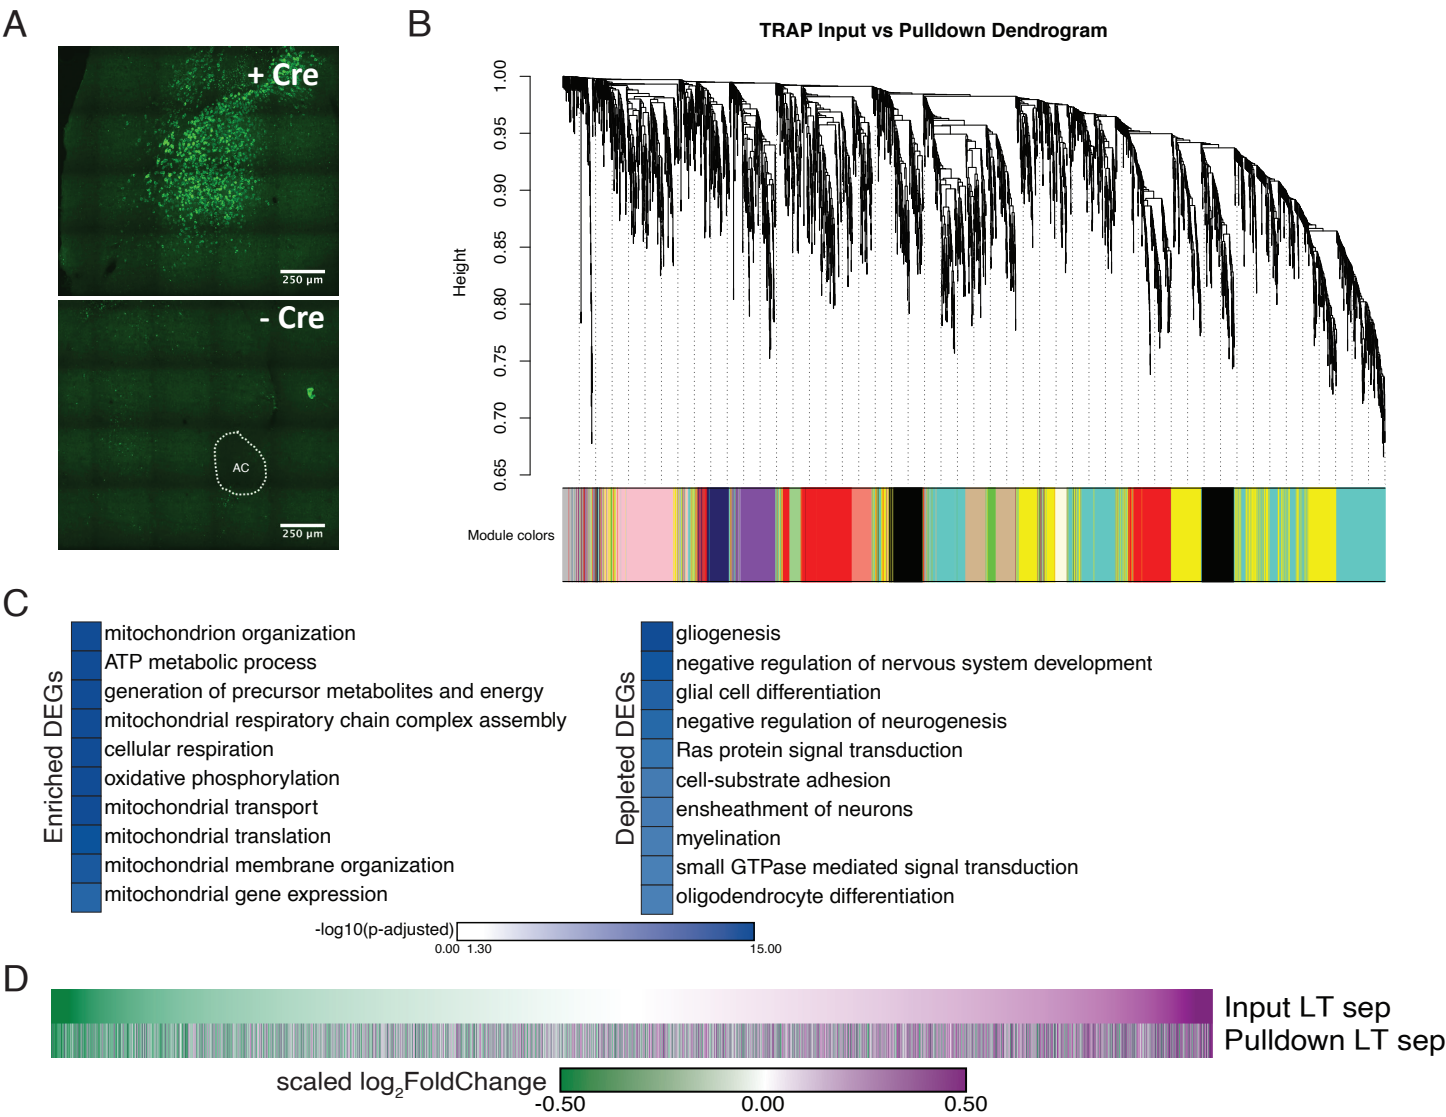

Supplement: supp [file elife-80517-supp-v1.zip]

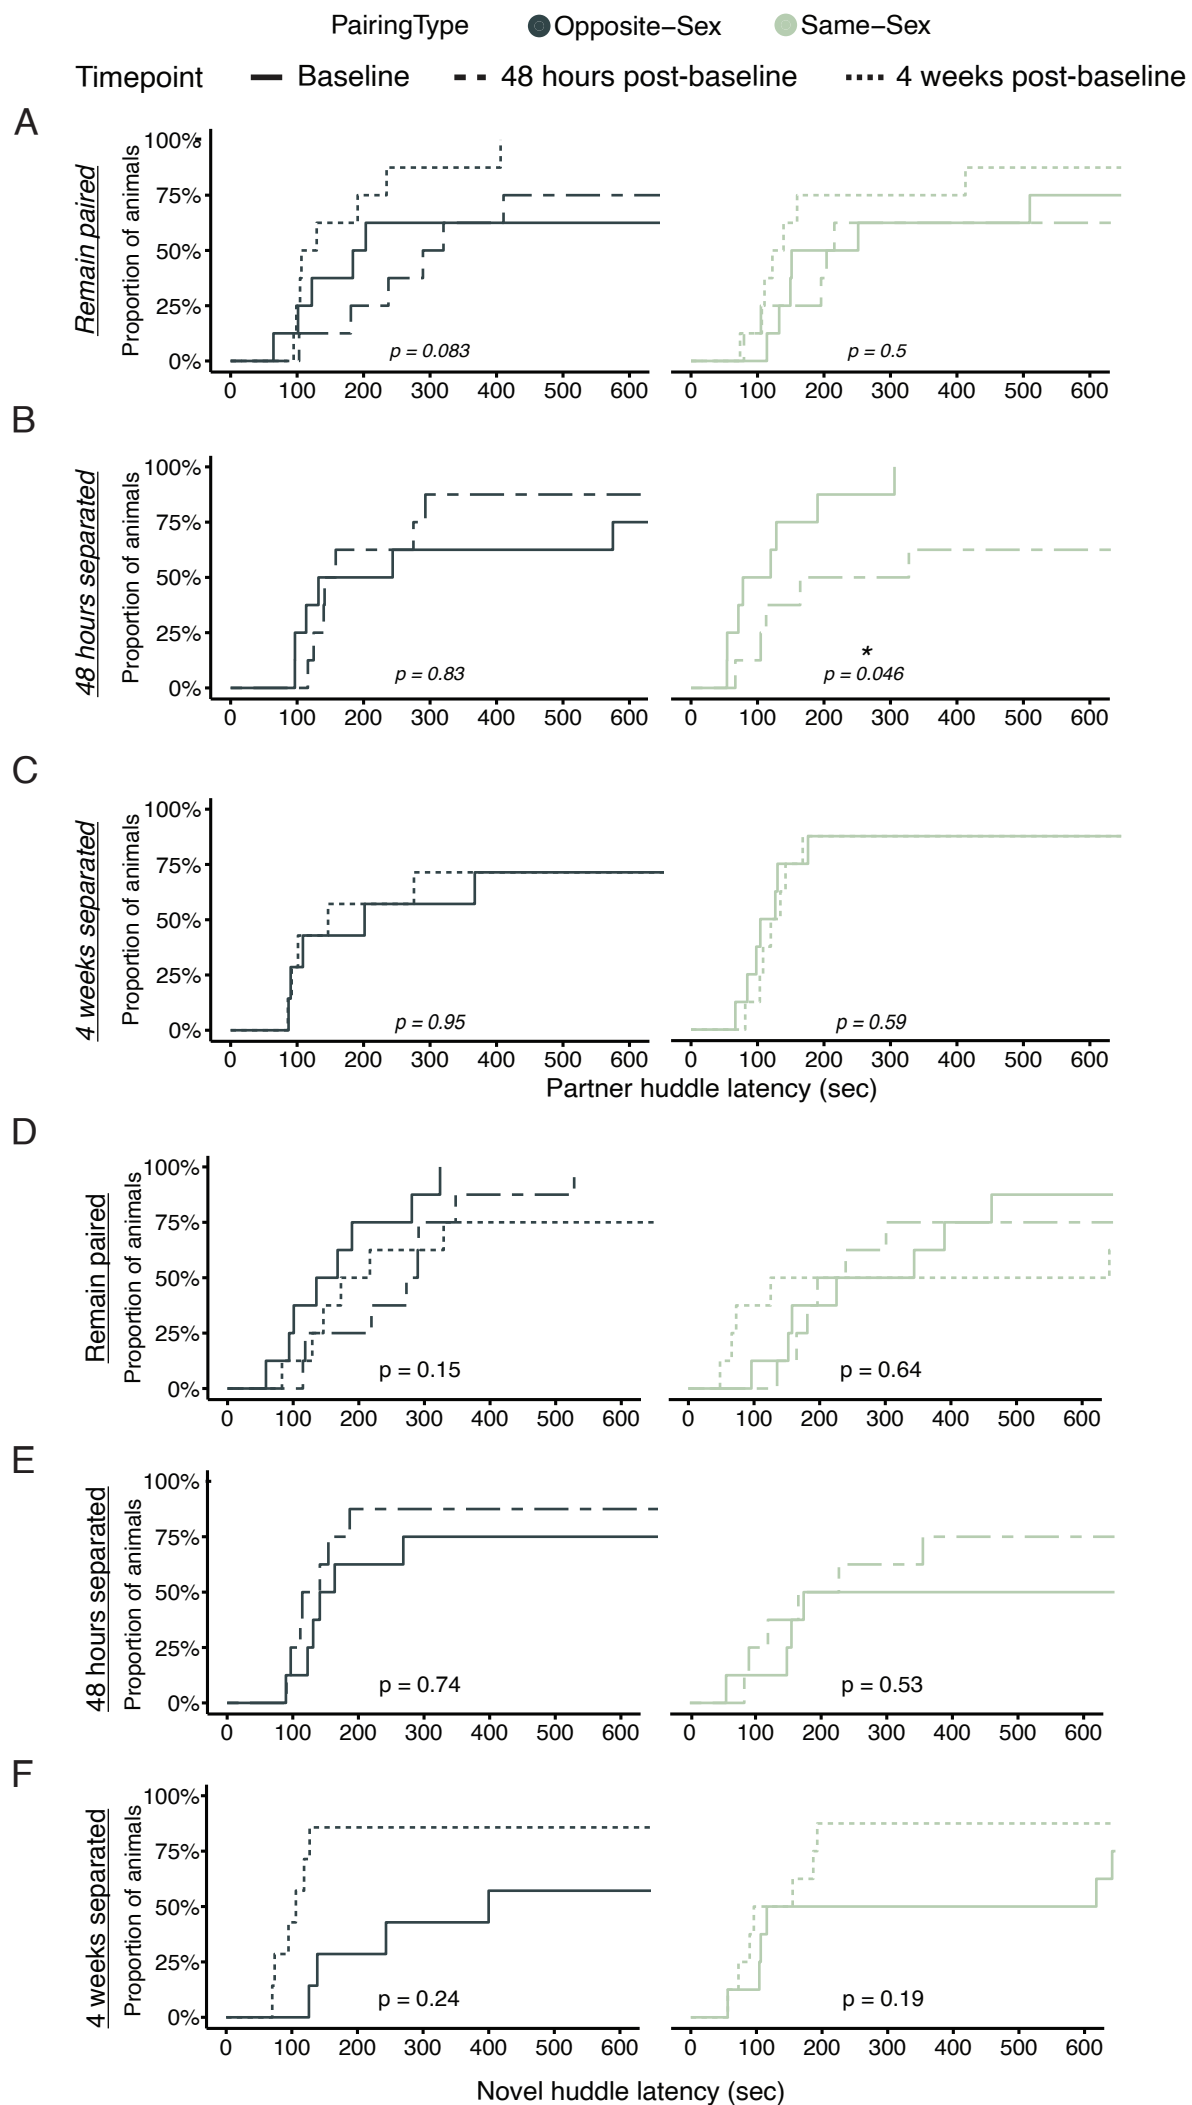

Supplement: supp [file elife-80517-supp-v1.zip › elife_poa_e80517_Figure_1_figure_supplement_1.pdf]

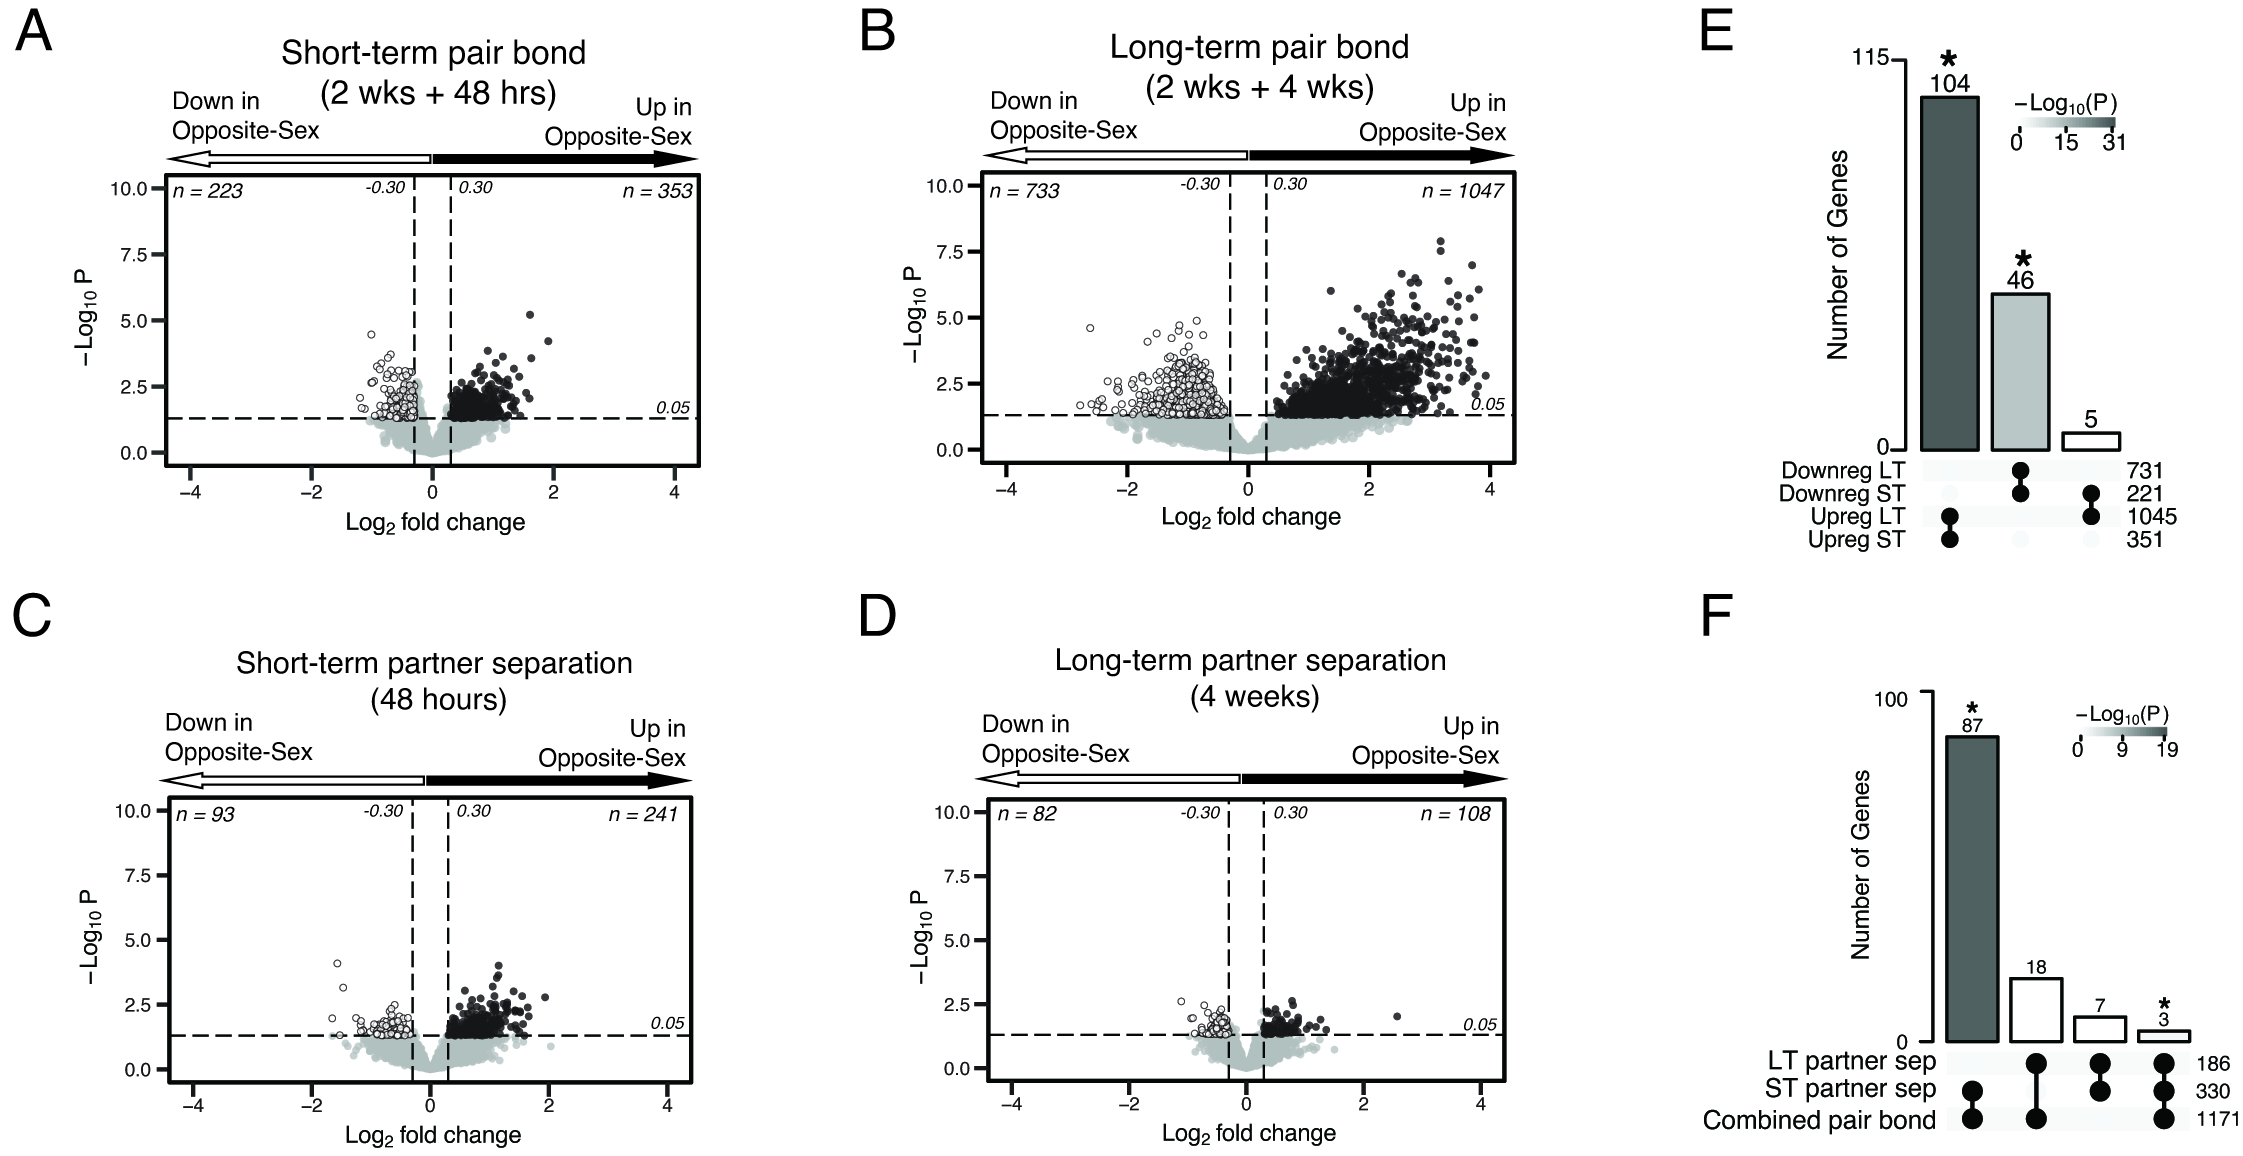

Supplement: supp [file elife-80517-supp-v1.zip › elife_poa_e80517_Figure_3_figure_supplement_2.tif]

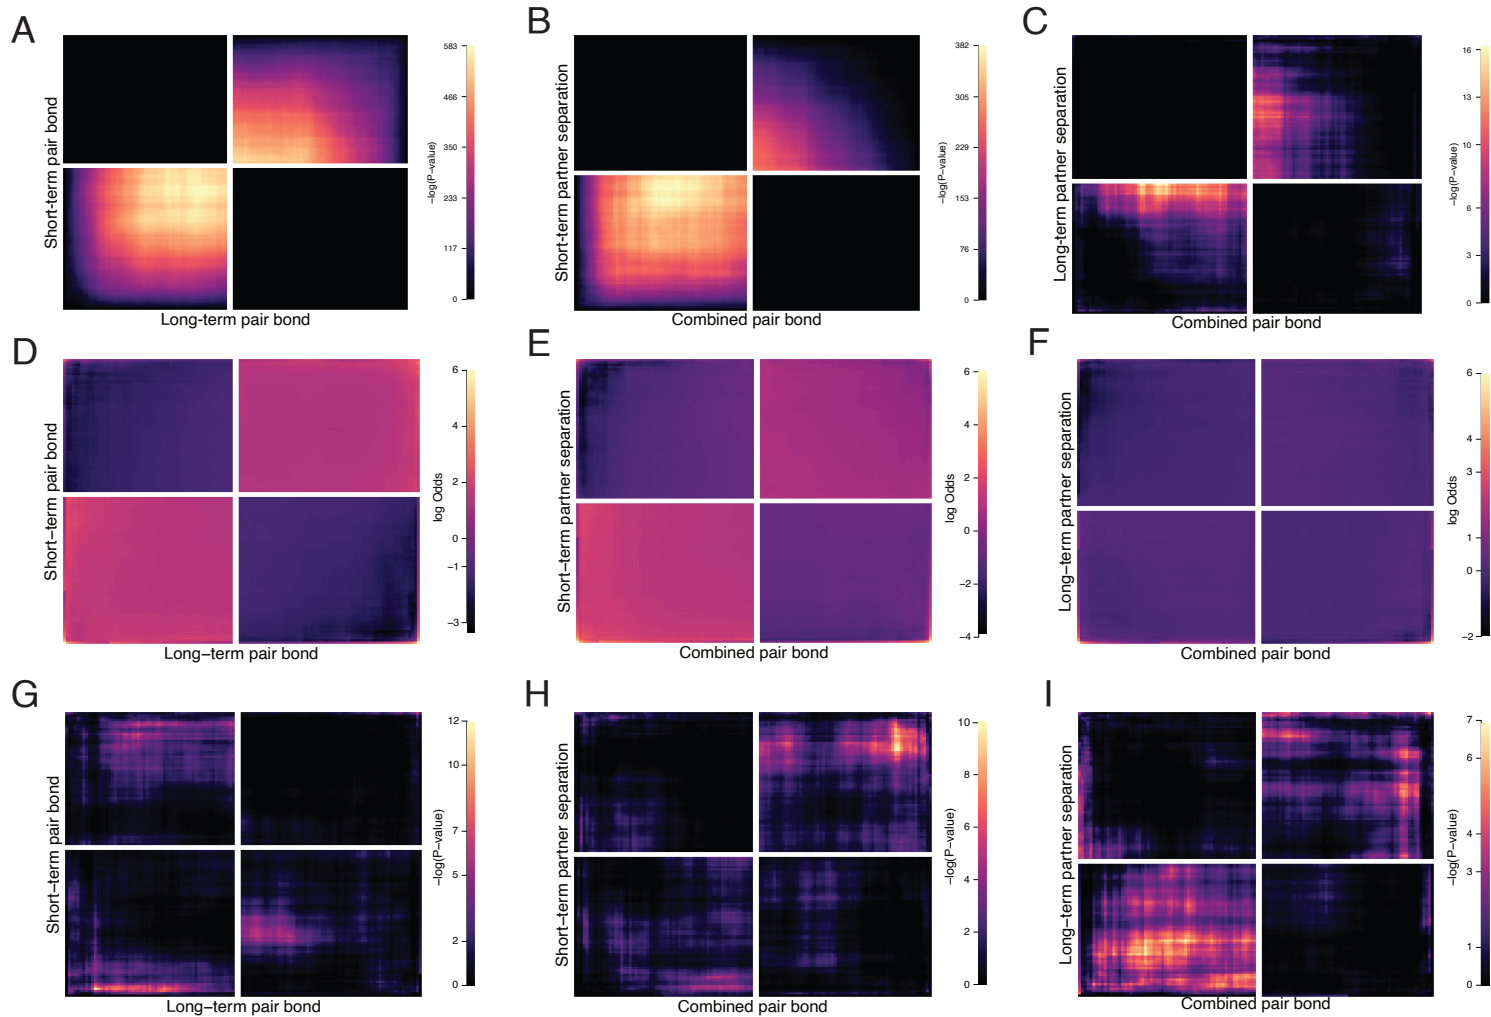

Supplement: supp [file elife-80517-supp-v1.zip › elife_poa_e80517_Figure_3_figure_supplement_4.pdf]
